# Supplementary material for: Burden of stroke in North Africa and Middle East, 1990 to 2019: a systematic analysis for the global burden of disease study 2019
Source: Springer Nature journal article supplement (doi:10.1186/s12883-022-02793-0), 2022-07-27

**Incidence**  
1990 2019

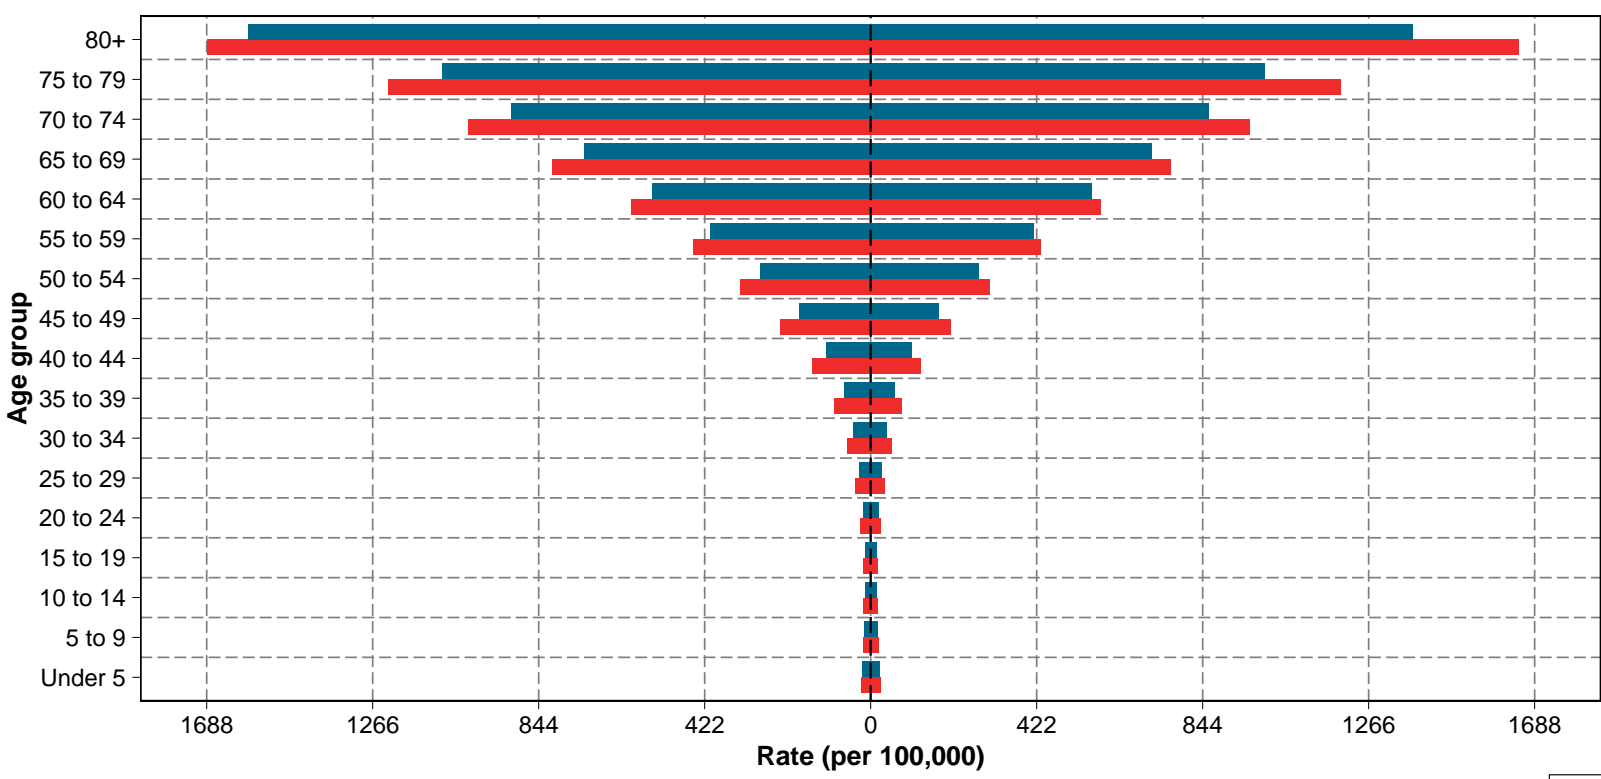

**Prevalence**  
1990 2019

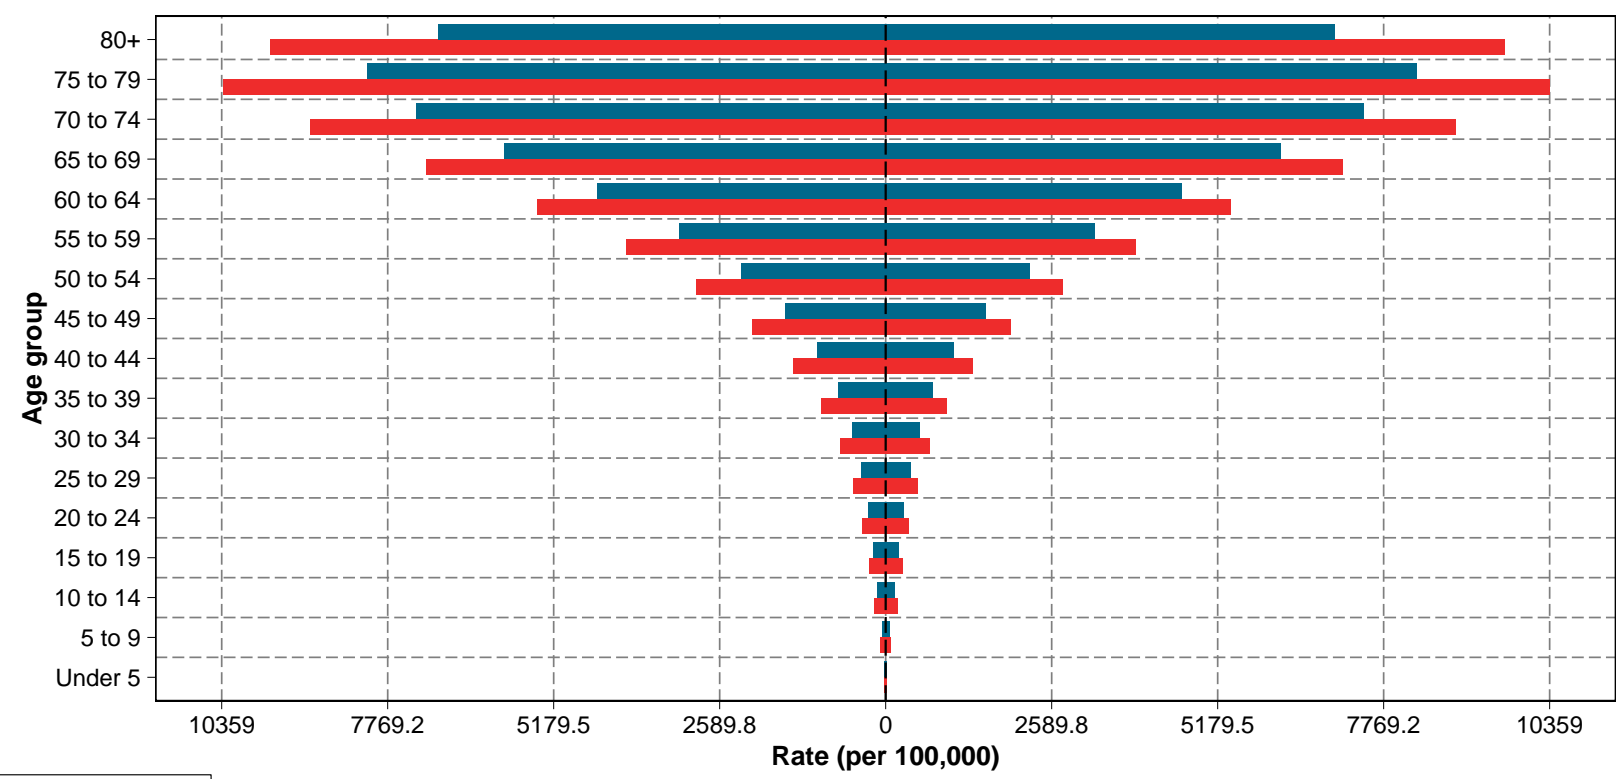

**Deaths**  
1990 2019

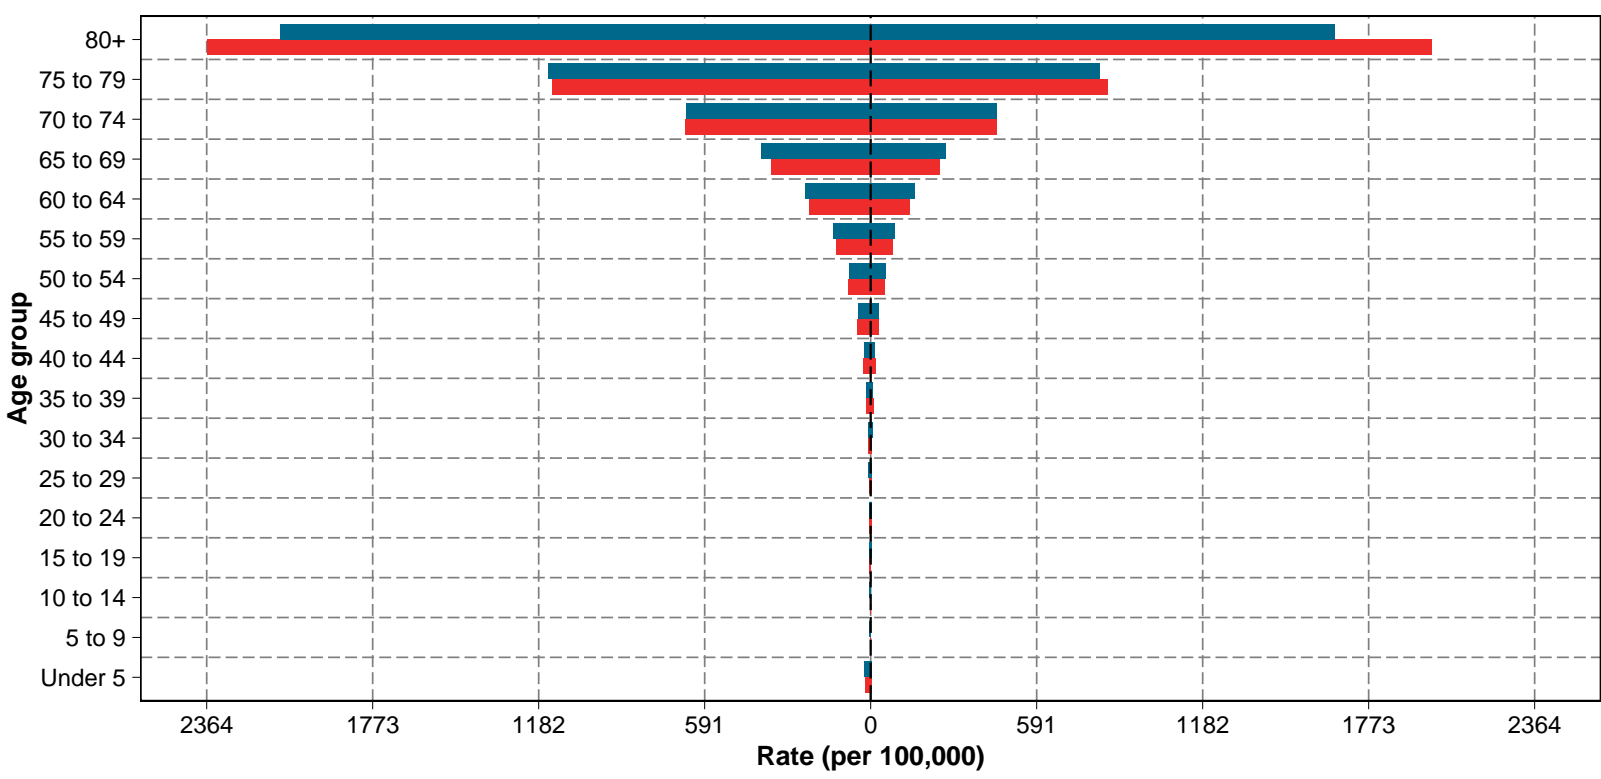

**Sex**  
Female Male

**DALYs**  
1990 2019

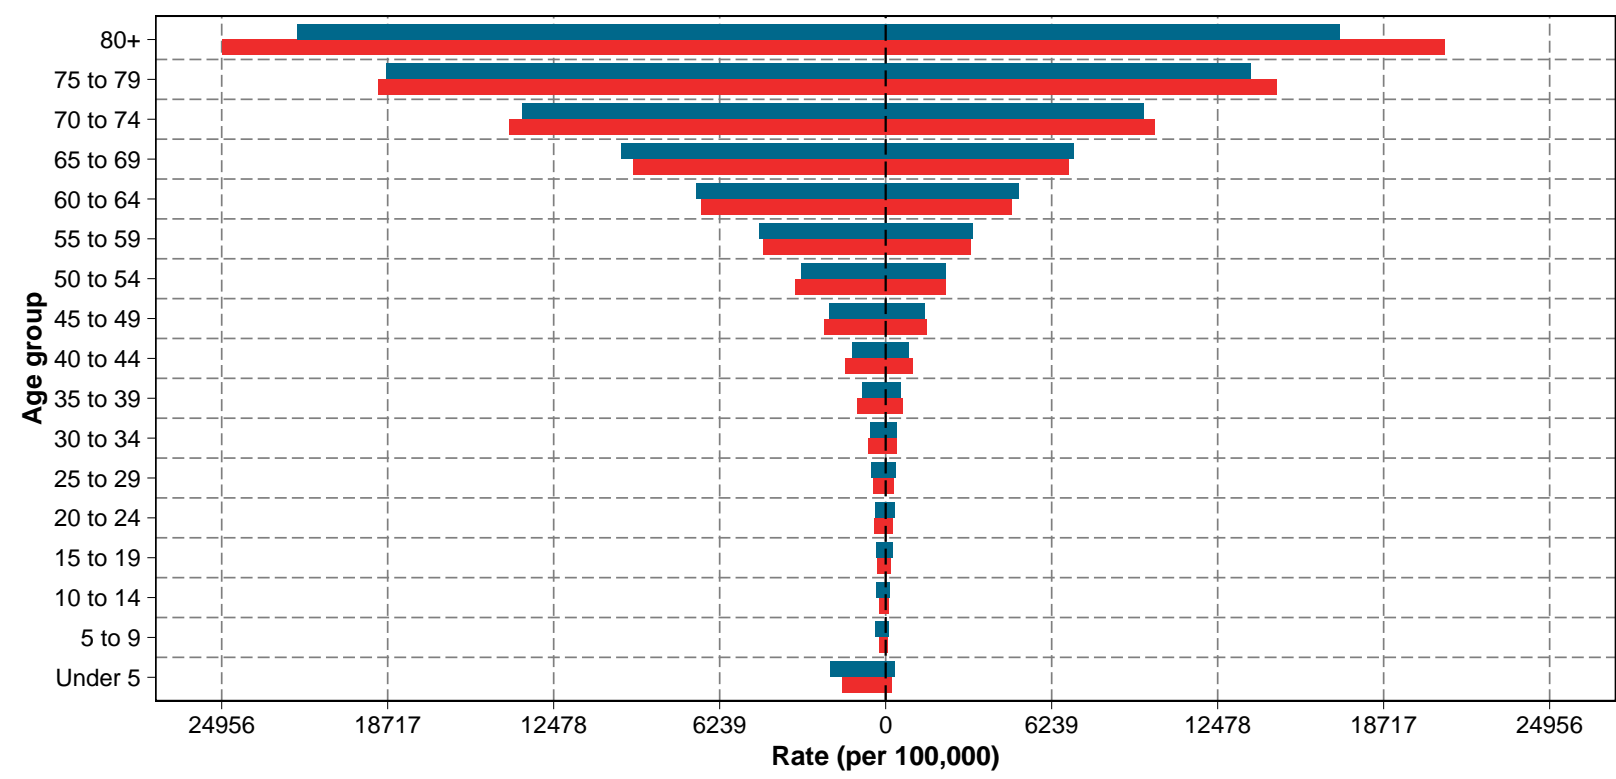

Supplement: MOESM1 [file 23310060]
