# Supplementary material for: Burden of stroke in North Africa and Middle East, 1990 to 2019: a systematic analysis for the global burden of disease study 2019
Source: Springer Nature journal article supplement (doi:10.1186/s12883-022-02793-0), 2022-07-27
Supplement: MOESM2 [file 23310060]

| Measure | Metric                              | Year                                  |                                       |                                       |                                       |                                       |                                       | % Change (1990 to 2019)   |                           |                           |
|---------|-------------------------------------|---------------------------------------|---------------------------------------|---------------------------------------|---------------------------------------|---------------------------------------|---------------------------------------|---------------------------|---------------------------|---------------------------|
|         |                                     | 1990                                  |                                       |                                       | 2019                                  |                                       |                                       | Both                      | Female                    | Male                      |
|         |                                     | Both                                  | Female                                | Male                                  | Both                                  | Female                                | Male                                  |                           |                           |                           |
| Deaths  | All ages number                     | 139,646<br>(119,721 to 158,492)       | 70,687<br>(59,470 to 80,741)          | 68,960<br>(59,643 to 85,159)          | 268,925<br>(237,694 to 305,151)       | 135,278<br>(118,602 to 153,364)       | 133,647<br>(116,656 to 154,453)       | 92.6 (69 to 127.1)        | 91.4 (68.1 to 130.3)      | 93.8 (63.6 to 129)        |
|         | Age-standardized rate (per 100,000) | 98.9 (83.4 to 112.4)                  | 100 (82.8 to 115.1)                   | 97.3 (83.7 to 119.8)                  | 74.3 (65.5 to 84.4)                   | 76.6 (66.5 to 87)                     | 72 (63.2 to 83.1)                     | -24.9 (-33.5 to -11.6)    | -23.4 (-32.5 to -7.3)     | -26.1 (-37.2 to -13.2)    |
| DALYs   | All ages number                     | 3,720,191<br>(3,296,673 to 4,210,080) | 1,864,468<br>(1,630,099 to 2,100,616) | 1,855,723<br>(1,625,798 to 2,239,319) | 6,825,095<br>(5,997,712 to 7,672,914) | 3,381,659<br>(2,964,458 to 3,806,477) | 3,443,435<br>(3,000,704 to 3,949,761) | 83.5 (62 to 112)          | 81.4 (59.1 to 112.7)      | 85.6 (59.2 to 118.2)      |
|         | Age-standardized rate (per 100,000) | 2112.9<br>(1846.3 to 2382.6)          | 2148.6<br>(1852.9 to 2418.8)          | 2072.4<br>(1804.7 to 2486)            | 1566.9<br>(1393.2 to 1757.1)          | 1602.7<br>(1419.3 to 1798.2)          | 1530.7 (1345 to 1746.4)               | -25.8 (-34.1 to -14)      | -25.4 (-33.9 to -12.3)    | -26.1 (-36.8 to -13.5)    |
| YLLs    | All ages number                     | 3,343,813<br>(2,915,076 to 3,820,011) | 1,642,895<br>(1,421,029 to 1,873,556) | 1,700,919<br>(1,477,336 to 2,091,745) | 5,856,993<br>(5,118,863 to 6,681,203) | 2,826,616<br>(2,430,203 to 3,230,624) | 3,030,377<br>(2,614,448 to 3,546,434) | 75.2 (52.3 to 105.9)      | 72.1 (48.9 to 106.7)      | 78.2 (50.9 to 113.3)      |
|         | Age-standardized rate (per 100,000) | 1909.3<br>(1647.4 to 2174.2)          | 1905.8<br>(1625.1 to 2166.3)          | 1907.7<br>(1648.8 to 2343.1)          | 1359.2<br>(1198.9 to 1548.9)          | 1358 (1182.6 to 1543.5)               | 1358.4<br>(1179.9 to 1577.9)          | -28.8 (-37.9 to -15.8)    | -28.7 (-37.8 to -14.4)    | -28.8 (-39.7 to -15.5)    |
| YLDs    | All ages number                     | 376,377<br>(275,042 to 477,102)       | 221,573<br>(162,779 to 280,478)       | 154,804<br>(112,886 to 197,367)       | 968,101<br>(708,487 to 1,217,543)     | 555,043<br>(406,276 to 703,151)       | 413,058<br>(300,546 to 520,677)       | 157.2<br>(151.4 to 163.6) | 150.5<br>(143.9 to 157.8) | 166.8<br>(159.1 to 174.8) |
|         | Age-standardized rate (per 100,000) | 203.6 (148.4 to 259)                  | 242.9 (177.3 to 307.8)                | 164.7 (119.8 to 211.3)                | 207.7 (152.1 to 263.7)                | 244.7 (179.4 to 309.5)                | 172.2 (125.3 to 217.8)                | 2 (-0.3 to 4.4)           | 0.8 (-2 to 3.8)           | 4.5 (1.6 to 7.6)          |

Data in parentheses are 95% Uncertainty Intervals (95% UIs)

DALYs=Disability-Adjusted Life Years; YLLs=Years of Life Lost; YLDs=Years Lived with Disability

*The attributed burden to all risk factors quantifies the burden caused by the stroke which can be attributed to known risk factors.*
