# Supplementary material for: Burden of stroke in North Africa and Middle East, 1990 to 2019: a systematic analysis for the global burden of disease study 2019
Source: Springer Nature journal article supplement (doi:10.1186/s12883-022-02793-0), 2022-07-27
Supplement: MOESM3 [file 23310060]

| Country     | Measure    | Age-standardized rate (per 100,000) |                              |                              |                              |                              |                              | % Change (1990 to 2019) |                        |                        |
|-------------|------------|-------------------------------------|------------------------------|------------------------------|------------------------------|------------------------------|------------------------------|-------------------------|------------------------|------------------------|
|             |            | 1990                                |                              |                              | 2019                         |                              |                              | Both                    | Female                 | Male                   |
|             |            | Both                                | Female                       | Male                         | Both                         | Female                       | Male                         |                         |                        |                        |
| Afghanistan | Incidence  | 235.9<br>(218.7 to 254.4)           | 253.7 (234.7 to 274.5)       | 215.5<br>(196.7 to 235.3)    | 217.7 (200.8 to 238.5)       | 229.5 (211.3 to 251.2)       | 207.3 (187.2 to 229.5)       | -7.7 (-11.8 to -3.2)    | -9.6 (-15 to -3.7)     | -3.8 (-9.1 to 2.5)     |
|             | Prevalence | 1597.6<br>(1485.6 to 1723.9)        | 1827.8<br>(1688 to 1974.4)   | 1363.9<br>(1256.8 to 1483)   | 1657.6<br>(1533.4 to 1779.5) | 1875.8<br>(1738.2 to 2022.4) | 1434.7<br>(1306.5 to 1561.9) | 3.8 (-1.2 to 8)         | 2.6 (-3.2 to 8.1)      | 5.2 (-1.6 to 11.1)     |
|             | Deaths     | 198.6<br>(135.7 to 257.5)           | 219.5 (136.8 to 288.7)       | 177.9 (122 to 236.7)         | 161.5 (110.3 to 208.5)       | 184.9 (118 to 245.3)         | 137.3 (98.4 to 184.1)        | -18.7 (-36.1 to -1.6)   | -15.7 (-35.7 to 6.5)   | -22.8 (-40.4 to -4.1)  |
|             | DALYs      | 4471.6<br>(3212.1 to 5710.6)        | 5125.9<br>(3559 to 6647.3)   | 3780.2<br>(2694.7 to 5062.8) | 3498.2<br>(2508.8 to 4500.4) | 4097.7<br>(2827.9 to 5410.5) | 2878.5 (2109 to 3743.7)      | -21.8 (-39.4 to -3.6)   | -20.1 (-39.3 to 2.6)   | -23.9 (-40.9 to -2.9)  |
|             | YLLs       | 4231.2<br>(2971.5 to 5515.6)        | 4835<br>(3252.5 to 6357.9)   | 3589.8<br>(2507.4 to 4861.4) | 3249.7<br>(2264.5 to 4235.5) | 3800.7<br>(2532.4 to 5132)   | 2680.7<br>(1917.4 to 3551.8) | -23.2 (-41.6 to -4)     | -21.4 (-41.4 to 2.6)   | -25.3 (-43.2 to -3.5)  |
|             | YLDs       | 240.4<br>(175.9 to 301.7)           | 290.8 (211.4 to 366.3)       | 190.4<br>(137.2 to 241)      | 248.5 (183.7 to 312)         | 297 (219.2 to 373.6)         | 197.8 (142.4 to 250.4)       | 3.4 (-2.1 to 8.1)       | 2.1 (-4 to 8.7)        | 3.9 (-3.4 to 11.1)     |
| Algeria     | Incidence  | 218.7 (200 to 239.8)                | 233.8 (212 to 257.3)         | 204.1<br>(185.3 to 226.1)    | 181.7 (164.3 to 202.2)       | 195.6 (176.7 to 217)         | 169.4 (150.9 to 190.9)       | -16.9 (-21.1 to -12.3)  | -16.3 (-22.1 to -10.5) | -17 (-22.8 to -9.8)    |
|             | Prevalence | 1724.6<br>(1603.2 to 1858.9)        | 1921.5<br>(1776.1 to 2069.8) | 1532.1<br>(1410.2 to 1671.4) | 1540.3<br>(1417.2 to 1668)   | 1720 (1573 to 1873.1)        | 1369.2<br>(1244.9 to 1493.4) | -10.7 (-14.5 to -7)     | -10.5 (-15.9 to -5.3)  | -10.6 (-15.6 to -5.2)  |
|             | Deaths     | 179.4<br>(149.3 to 211.2)           | 198.1 (163.1 to 233.8)       | 167.9<br>(132.7 to 206.8)    | 101.5 (82.6 to 121.6)        | 120.7 (93 to 144.9)          | 89.5 (70.1 to 112.3)         | -43.4 (-54.9 to -30.2)  | -39.1 (-51.7 to -24.3) | -46.7 (-58.8 to -31.1) |
|             | DALYs      | 3167.5<br>(2642 to 3755.9)          | 3421.3<br>(2800.4 to 4066.2) | 2977<br>(2353.8 to 3676.1)   | 1755.4<br>(1459.6 to 2081.9) | 1979.9<br>(1585.6 to 2345.6) | 1586.9<br>(1262.8 to 1965.2) | -44.6 (-55 to -31.9)    | -42.1 (-53.2 to -29.7) | -46.7 (-58.6 to -31.8) |
|             | YLLs       | 2895.9<br>(2372.6 to 3490)          | 3099.4<br>(2467.5 to 3737.7) | 2754.6<br>(2140.4 to 3446.9) | 1512.6 (1223 to 1842.1)      | 1691.6<br>(1306.1 to 2042)   | 1387.4<br>(1058.8 to 1764.7) | -47.8 (-58.8 to -34)    | -45.4 (-57 to -32)     | -49.6 (-61.7 to -34)   |
|             | YLDs       | 271.7<br>(197.5 to 343.9)           | 322 (235.6 to 405)           | 222.4 (162 to 283.9)         | 242.8 (178.6 to 307.3)       | 288.3 (211.9 to 368.1)       | 199.5 (145.5 to 252.4)       | -10.6 (-14.9 to -6)     | -10.5 (-16.5 to -4.5)  | -10.3 (-15.9 to -3.7)  |

| Country | Measure    | Age-standardized rate (per 100,000) |                              |                              |                              |                              |                              | % Change (1990 to 2019) |                        |                        |
|---------|------------|-------------------------------------|------------------------------|------------------------------|------------------------------|------------------------------|------------------------------|-------------------------|------------------------|------------------------|
|         |            | 1990                                |                              |                              | 2019                         |                              |                              | Both                    | Female                 | Male                   |
|         |            | Both                                | Female                       | Male                         | Both                         | Female                       | Male                         |                         |                        |                        |
| Bahrain | Incidence  | 168.7<br>(153.4 to 186.1)           | 192.8 (173.7 to 214.4)       | 147.6<br>(133.5 to 163.3)    | 113.4 (102.3 to 126.6)       | 129.3 (115.6 to 145.1)       | 102.3 (91.8 to 115)          | -32.8 (-36.8 to -28.7)  | -32.9 (-38.2 to -27.6) | -30.7 (-35.7 to -25.3) |
|         | Prevalence | 1499.7<br>(1387.3 to 1636.7)        | 1776.4<br>(1629.9 to 1946.5) | 1261.5<br>(1160.6 to 1372.1) | 1136.4 (1049 to 1234.8)      | 1343.4<br>(1231 to 1478.1)   | 993.7 (916.1 to 1082.9)      | -24.2 (-27.5 to -20.8)  | -24.4 (-28.9 to -19.8) | -21.2 (-25.7 to -16.5) |
|         | Deaths     | 102.5 (90.2 to 118.9)               | 108.1 (94.2 to 123.6)        | 96.7 (82.7 to 123.3)         | 52.8 (43.5 to 66.9)          | 58.3 (47.3 to 70.6)          | 47.7 (38.7 to 68.2)          | -48.5 (-58.4 to -36.5)  | -46.1 (-57.8 to -31.2) | -50.6 (-61.4 to -37.7) |
|         | DALYs      | 1981.3<br>(1768.7 to 2241.6)        | 2180.5<br>(1927.8 to 2463.4) | 1811.4<br>(1579.4 to 2135.9) | 940.9 (796.8 to 1146.2)      | 1069.9<br>(905.6 to 1266.2)  | 842.5 (698.9 to 1104.8)      | -52.5 (-61.2 to -42.5)  | -50.9 (-60 to -39.8)   | -53.5 (-62.8 to -42.5) |
|         | YLLs       | 1746.7<br>(1538.4 to 2013.1)        | 1884.5<br>(1645.3 to 2159.1) | 1630.3<br>(1398.1 to 1971.2) | 767 (633.5 to 977.6)         | 849.9 (694.6 to 1033.5)      | 701.2 (565 to 965.8)         | -56.1 (-65 to -45)      | -54.9 (-64.8 to -42.3) | -57 (-66.4 to -44.7)   |
|         | YLDs       | 234.6 (172 to 295.1)                | 295.9 (217.6 to 373.6)       | 181.1<br>(131.3 to 228.7)    | 173.8 (126 to 219.2)         | 220 (158.3 to 278.9)         | 141.3 (102.6 to 178.3)       | -25.9 (-30 to -21.8)    | -25.6 (-31 to -20.2)   | -22 (-27.5 to -16)     |
| Egypt   | Incidence  | 208.4<br>(190.8 to 229.2)           | 225.8 (205.1 to 248.5)       | 190.9<br>(174.1 to 211.6)    | 228.4 (205 to 255.3)         | 263.1 (232.7 to 295.2)       | 202.8 (180.4 to 229.1)       | 9.6 (3.5 to 16.5)       | 16.5 (7.7 to 25.9)     | 6.2 (-1.1 to 14.4)     |
|         | Prevalence | 1523.8<br>(1408.7 to 1660.1)        | 1713.4<br>(1573.1 to 1881.9) | 1333.5<br>(1225.8 to 1457.5) | 1806.1<br>(1658.1 to 1974.5) | 2109.9<br>(1929.1 to 2306.9) | 1561.1<br>(1415.7 to 1723.1) | 18.5 (12.9 to 23.9)     | 23.1 (15.2 to 30.7)    | 17.1 (9.8 to 24.2)     |
|         | Deaths     | 110.8 (93.9 to 129)                 | 113.5 (89.4 to 131.5)        | 107.9 (92 to 133.7)          | 85.7 (63.1 to 118.9)         | 106 (74.7 to 146.9)          | 76 (53.2 to 111.2)           | -22.6 (-42.6 to 1.6)    | -6.7 (-31.3 to 23.7)   | -29.6 (-48.5 to -4.9)  |
|         | DALYs      | 3316<br>(2889.1 to 3785.7)          | 3159.1<br>(2603.7 to 3729.5) | 3456.7<br>(2952.4 to 4055.5) | 2138 (1636.8 to 2809.8)      | 2331.5<br>(1745.9 to 3073.2) | 2050.6<br>(1517.6 to 2794.5) | -35.5 (-50 to -17)      | -26.2 (-43.6 to -4.9)  | -40.7 (-56.8 to -20.4) |
|         | YLLs       | 3076.6<br>(2652.9 to 3538)          | 2873.7<br>(2308.1 to 3436.4) | 3263.5<br>(2769.8 to 3852.6) | 1855.4<br>(1367.5 to 2533.1) | 1977.9<br>(1421.1 to 2695)   | 1825.1<br>(1299.2 to 2565.1) | -39.7 (-55.1 to -19.7)  | -31.2 (-50.2 to -8)    | -44.1 (-61.1 to -22.6) |
|         | YLDs       | 239.4<br>(173.2 to 304.9)           | 285.4 (205.8 to 363.6)       | 193.1<br>(138.5 to 247.7)    | 282.6 (206.4 to 356.5)       | 353.6 (259.8 to 445.5)       | 225.6 (162.3 to 287.3)       | 18 (11.8 to 24.2)       | 23.9 (15.1 to 32.4)    | 16.8 (8.7 to 25)       |

| Country                    | Measure    | Age-standardized rate (per 100,000) |                              |                              |                              |                              |                              | % Change (1990 to 2019) |                        |                        |
|----------------------------|------------|-------------------------------------|------------------------------|------------------------------|------------------------------|------------------------------|------------------------------|-------------------------|------------------------|------------------------|
|                            |            | 1990                                |                              |                              | 2019                         |                              |                              | Both                    | Female                 | Male                   |
|                            |            | Both                                | Female                       | Male                         | Both                         | Female                       | Male                         |                         |                        |                        |
| Iran (Islamic Republic of) | Incidence  | 166.6<br>(146.6 to 190.9)           | 166 (146.4 to 189.8)         | 167.8<br>(146.9 to 192.1)    | 138.8 (121.8 to 159.6)       | 143.7 (125.3 to 165.6)       | 134 (117.3 to 154.1)         | -16.7 (-18.1 to -15.1)  | -13.4 (-15.7 to -10.7) | -20.1 (-21.9 to -18.3) |
|                            | Prevalence | 1446.9<br>(1279.8 to 1649.5)        | 1590.6<br>(1412.9 to 1796.1) | 1306.1<br>(1144.4 to 1502.8) | 1253.8<br>(1113.5 to 1418.4) | 1349.7<br>(1199.5 to 1520.2) | 1159.3<br>(1022.9 to 1319.6) | -13.3 (-15.9 to -10.7)  | -15.1 (-17.9 to -12.3) | -11.2 (-14.9 to -7.3)  |
|                            | Deaths     | 120.7<br>(102.8 to 133.5)           | 119.3 (97.9 to 132.8)        | 120.5 (99.8 to 136.2)        | 66.2 (58.7 to 71.3)          | 68.2 (59 to 74.4)            | 64.8 (57.3 to 70.3)          | -45.1 (-50.6 to -35.4)  | -42.8 (-49 to -28.2)   | -46.3 (-53.9 to -37.9) |
|                            | DALYs      | 2324.3<br>(2051.8 to 2547)          | 2273.2<br>(1968 to 2521.3)   | 2353.7<br>(2039.8 to 2680)   | 1262.2<br>(1153.5 to 1346.3) | 1252.8<br>(1126.4 to 1360.2) | 1274.9<br>(1173.4 to 1371.5) | -45.7 (-51 to -38.3)    | -44.9 (-50.5 to -34.8) | -45.8 (-52.2 to -38.4) |
|                            | YLLs       | 2099.4<br>(1838.1 to 2315.2)        | 2010.4<br>(1714.9 to 2235)   | 2165.6<br>(1872.3 to 2471.9) | 1065.8<br>(976.7 to 1134.4)  | 1027.6<br>(914.9 to 1114.7)  | 1107.2<br>(1008.5 to 1192.1) | -49.2 (-54.5 to -41.4)  | -48.9 (-54.7 to -38)   | -48.9 (-55.5 to -41.1) |
|                            | YLDs       | 225 (161.2 to 290.2)                | 262.8 (188.6 to 336.4)       | 188.1 (135 to 244.4)         | 196.4 (140.3 to 251.9)       | 225.2 (162.4 to 288.2)       | 167.7 (119.6 to 216.7)       | -12.7 (-15.5 to -10)    | -14.3 (-17.2 to -11.4) | -10.9 (-14.6 to -6.8)  |
| Iraq                       | Incidence  | 273.7<br>(249.1 to 300.1)           | 283 (256.6 to 313.4)         | 263.6<br>(239.4 to 291.4)    | 241.6 (216.9 to 267)         | 251.8 (223.5 to 279)         | 229 (205.5 to 255.4)         | -11.7 (-16.4 to -6.7)   | -11 (-17.8 to -3.8)    | -13.1 (-18.8 to -6.7)  |
|                            | Prevalence | 2177.9<br>(2027.8 to 2349.2)        | 2361<br>(2194.4 to 2551.7)   | 1988.1<br>(1830.6 to 2150.2) | 1968.8<br>(1823.4 to 2122.1) | 2125.9<br>(1956.5 to 2301.3) | 1798.1<br>(1653.6 to 1955.1) | -9.6 (-13.3 to -5.4)    | -10 (-15.6 to -4.3)    | -9.6 (-15 to -3.7)     |
|                            | Deaths     | 166.1<br>(140.6 to 193.9)           | 159.8 (131.4 to 190.3)       | 171.8<br>(138.4 to 212.7)    | 143.3 (119.2 to 166.1)       | 130.4 (108.1 to 152.5)       | 156.6 (129.2 to 180.7)       | -13.7 (-30.2 to 4.5)    | -18.4 (-36.2 to 2.6)   | -8.8 (-29.2 to 16.3)   |
|                            | DALYs      | 3625.9<br>(3103.7 to 4212.9)        | 3440.4<br>(2892.9 to 4034.8) | 3806.5<br>(3068.5 to 4676.9) | 2922.9 (2399 to 3459.1)      | 2633.5<br>(2172.9 to 3105.6) | 3215.2<br>(2605.8 to 3837.4) | -19.4 (-35.5 to -0.8)   | -23.5 (-40.2 to -3.7)  | -15.5 (-35.2 to 9.5)   |
|                            | YLLs       | 3290.4<br>(2783.1 to 3856.6)        | 3051.6<br>(2496.5 to 3667.3) | 3526.5<br>(2786 to 4394.2)   | 2616.5<br>(2102.7 to 3132.9) | 2279.1<br>(1838 to 2745.4)   | 2960.2<br>(2363.2 to 3565.5) | -20.5 (-38.2 to 0)      | -25.3 (-44.1 to -2.8)  | -16.1 (-36.8 to 11.4)  |
|                            | YLDs       | 335.5<br>(247.9 to 421)             | 388.7 (286.6 to 486.3)       | 280 (203.4 to 354.4)         | 306.4 (223.5 to 385.2)       | 354.5 (259.3 to 446.4)       | 255 (185.7 to 319.6)         | -8.7 (-13.3 to -3.7)    | -8.8 (-15 to -2)       | -9 (-15.8 to -1.7)     |

| Country | Measure    | Age-standardized rate (per 100,000) |                           |                           |                           |                           |                           | % Change (1990 to 2019) |                        |                        |
|---------|------------|-------------------------------------|---------------------------|---------------------------|---------------------------|---------------------------|---------------------------|-------------------------|------------------------|------------------------|
|         |            | 1990                                |                           |                           | 2019                      |                           |                           | Both                    | Female                 | Male                   |
|         |            | Both                                | Female                    | Male                      | Both                      | Female                    | Male                      |                         |                        |                        |
| Jordan  | Incidence  | 306 (274.1 to 345.1)                | 330.4 (295.3 to 371.9)    | 281.8 (252.1 to 319)      | 225.9 (200.5 to 253.4)    | 238.1 (211.1 to 268.8)    | 214.8 (188.9 to 242.4)    | -26.2 (-30.9 to -20.8)  | -27.9 (-34.1 to -20.7) | -23.8 (-30.3 to -16.5) |
|         | Prevalence | 2342.5 (2150.9 to 2519.7)           | 2636.2 (2425.5 to 2829.1) | 2054.6 (1854.3 to 2240.7) | 1793.9 (1621.2 to 1952.9) | 2009 (1844.9 to 2184)     | 1600.9 (1402.7 to 1795.5) | -23.4 (-27.7 to -19.5)  | -23.8 (-28.4 to -18.7) | -22.1 (-28.9 to -15.1) |
|         | Deaths     | 150.9 (123.6 to 175.4)              | 179 (143 to 212.1)        | 122.5 (90.6 to 147.9)     | 75.7 (61.3 to 89)         | 83.4 (66.9 to 100.8)      | 69.3 (49.6 to 86.9)       | -49.8 (-59.4 to -39.2)  | -53.4 (-63.9 to -39.7) | -43.5 (-57.7 to -26)   |
|         | DALYs      | 2910 (2466.9 to 3357.8)             | 3397.8 (2813.2 to 3942)   | 2420 (1823.8 to 2868.7)   | 1448 (1220.4 to 1679.5)   | 1567.2 (1301 to 1843.4)   | 1341.5 (1037.4 to 1637.5) | -50.2 (-58.7 to -41.1)  | -53.9 (-63 to -42.5)   | -44.6 (-57.6 to -29.6) |
|         | YLLs       | 2537.3 (2107.4 to 2961.2)           | 2951.2 (2380.7 to 3505.7) | 2120 (1569.5 to 2582.4)   | 1163.5 (954.9 to 1374.6)  | 1225.7 (976.2 to 1498.5)  | 1108.5 (804.4 to 1401.8)  | -54.1 (-63.2 to -43.8)  | -58.5 (-68 to -45.7)   | -47.7 (-62 to -30.7)   |
|         | YLDs       | 372.8 (275.9 to 467.3)              | 446.6 (326.1 to 560.9)    | 300 (218.2 to 380)        | 284.5 (207.6 to 358.1)    | 341.5 (250.3 to 429.2)    | 233.1 (167.4 to 299.5)    | -23.7 (-28.5 to -19.2)  | -23.5 (-28.6 to -18.2) | -22.3 (-30.3 to -14.4) |
| Kuwait  | Incidence  | 129.3 (117.8 to 143.2)              | 143.2 (128.1 to 159.1)    | 118.8 (107.6 to 132.7)    | 125.8 (113.7 to 140.4)    | 114.2 (101.9 to 127.3)    | 133.2 (119.3 to 150.4)    | -2.7 (-8.2 to 3.3)      | -20.3 (-25.9 to -13.8) | 12.1 (3.5 to 21.2)     |
|         | Prevalence | 1307.7 (1215 to 1402.4)             | 1494.9 (1380.5 to 1620.6) | 1182.3 (1088.2 to 1273)   | 1230.6 (1134.6 to 1332.5) | 1258.3 (1158.6 to 1368.3) | 1203.7 (1101.4 to 1315.5) | -5.9 (-10.4 to -1.4)    | -15.8 (-20.9 to -10.7) | 1.8 (-4.8 to 8.4)      |
|         | Deaths     | 51.5 (44.4 to 57.6)                 | 57 (48.1 to 65.9)         | 45.9 (39.8 to 51.1)       | 46.5 (38 to 55.2)         | 35.1 (27.5 to 42.5)       | 54.1 (43.1 to 66)         | -9.6 (-24.2 to 7.7)     | -38.5 (-49.2 to -25.6) | 17.8 (-3.8 to 44)      |
|         | DALYs      | 1062.6 (953.7 to 1169.4)            | 1196.2 (1049.2 to 1358.7) | 962.9 (865.1 to 1060)     | 938.4 (795 to 1093.3)     | 733.2 (616.2 to 859.1)    | 1078 (885.2 to 1296.6)    | -11.7 (-24 to 3.3)      | -38.7 (-47.5 to -28.4) | 12 (-7.3 to 34.4)      |
|         | YLLs       | 859.4 (762.7 to 948.7)              | 946.3 (815 to 1091.9)     | 791.2 (700.7 to 872.7)    | 749 (616.5 to 896.1)      | 523.9 (417.7 to 632.2)    | 903.6 (721.1 to 1118.7)   | -12.8 (-27.8 to 5.7)    | -44.6 (-54.8 to -31.9) | 14.2 (-9.2 to 42)      |
|         | YLDs       | 203.3 (149.1 to 254.2)              | 249.9 (183.9 to 314.9)    | 171.6 (124.6 to 215.7)    | 189.4 (138.2 to 238)      | 209.2 (152.9 to 265.5)    | 174.3 (125.5 to 218.8)    | -6.8 (-12.1 to -1.3)    | -16.3 (-22.2 to -10.1) | 1.6 (-6.2 to 10)       |

| Country | Measure    | Age-standardized rate (per 100,000) |                              |                              |                              |                              |                              | % Change (1990 to 2019) |                        |                       |
|---------|------------|-------------------------------------|------------------------------|------------------------------|------------------------------|------------------------------|------------------------------|-------------------------|------------------------|-----------------------|
|         |            | 1990                                |                              |                              | 2019                         |                              |                              | Both                    | Female                 | Male                  |
|         |            | Both                                | Female                       | Male                         | Both                         | Female                       | Male                         |                         |                        |                       |
| Lebanon | Incidence  | 158.9<br>(144.4 to 175.1)           | 191.1 (172.2 to 213)         | 125.8<br>(113.8 to 139.9)    | 150.5 (135.7 to 167.8)       | 171.4 (152.6 to 193.8)       | 125.8 (113.2 to 140)         | -5.3 (-9.9 to 0.3)      | -10.3 (-17 to -3.4)    | 0 (-7 to 8)           |
|         | Prevalence | 1395<br>(1289.8 to 1503.7)          | 1681.8<br>(1553.6 to 1818.8) | 1095.5<br>(1005 to 1193.1)   | 1425.1<br>(1320.3 to 1538.1) | 1637.2<br>(1503.3 to 1770.9) | 1173.9 (1075 to 1276)        | 2.2 (-1.8 to 6.6)       | -2.7 (-7.9 to 3.1)     | 7.1 (0.7 to 13)       |
|         | Deaths     | 58.1 (48.4 to 69.3)                 | 62.9 (50.8 to 77.4)          | 51.9 (42 to 63)              | 35.2 (24.5 to 45.6)          | 34.6 (22.6 to 45.5)          | 35.6 (24.7 to 48.4)          | -39.5 (-55.5 to -19.2)  | -45 (-60.1 to -23.2)   | -31.4 (-54.4 to -5)   |
|         | DALYs      | 1135.7<br>(980.3 to 1327.2)         | 1258.1<br>(1068.7 to 1486.1) | 998.4<br>(832.2 to 1199.4)   | 752.9 (593.3 to 935.9)       | 776.9 (600.7 to 968.8)       | 722.7 (539.9 to 931.9)       | -33.7 (-47.6 to -16)    | -38.2 (-52.3 to -21)   | -27.6 (-46.4 to -5.2) |
|         | YLLs       | 915.1<br>(774.3 to 1101.2)          | 977.9 (802.1 to 1201.3)      | 840.3<br>(690.3 to 1035)     | 528.3 (372.5 to 692.1)       | 504.8 (337.8 to 675.3)       | 554.4 (377.8 to 765.6)       | -42.3 (-59.3 to -21.3)  | -48.4 (-63.8 to -26.6) | -34 (-57.7 to -7.6)   |
|         | YLDs       | 220.5<br>(159.4 to 277.9)           | 280.2 (203.4 to 354.5)       | 158.1<br>(113.7 to 200.8)    | 224.6 (165.6 to 281.1)       | 272.1 (199.6 to 341.7)       | 168.3 (124 to 213.4)         | 1.8 (-2.8 to 7.2)       | -2.9 (-8.9 to 3.7)     | 6.5 (-0.5 to 14.6)    |
| Libya   | Incidence  | 158.4<br>(144.6 to 173.8)           | 189.7 (172.3 to 209.8)       | 131.3<br>(118.5 to 146.9)    | 170.9 (153.6 to 190.3)       | 205.9 (184.1 to 231.3)       | 137.3 (122.2 to 154.6)       | 7.9 (2.1 to 14.6)       | 8.6 (0.6 to 17.3)      | 4.6 (-3.1 to 13.6)    |
|         | Prevalence | 1393.6<br>(1294.4 to 1505.9)        | 1722.8<br>(1593.9 to 1863.9) | 1107.3<br>(1017.3 to 1206)   | 1588.4<br>(1461.7 to 1712.9) | 1962.6<br>(1805.7 to 2124.5) | 1230.9<br>(1123.6 to 1346.7) | 14 (8.9 to 18.7)        | 13.9 (7.9 to 20.4)     | 11.2 (4.7 to 18.2)    |
|         | Deaths     | 84.6 (66.2 to 107)                  | 90.1 (68.5 to 116.3)         | 79.7 (61.3 to 104)           | 69.4 (53 to 90.1)            | 73.3 (53.5 to 94.3)          | 65.4 (47.3 to 94.3)          | -17.9 (-36.4 to 7.9)    | -18.6 (-38.6 to 7.5)   | -18 (-39.2 to 13.5)   |
|         | DALYs      | 1996.7<br>(1628.5 to 2421.5)        | 2181.7<br>(1758.3 to 2699.4) | 1845.5<br>(1452.1 to 2305.6) | 1570.5<br>(1237.3 to 2001.2) | 1728.1<br>(1324.9 to 2172.1) | 1418.4<br>(1048.8 to 1982)   | -21.3 (-37.5 to 1.4)    | -20.8 (-37.9 to 1.1)   | -23.1 (-43.4 to 5.8)  |
|         | YLLs       | 1776.7<br>(1419.8 to 2228.9)        | 1894.6<br>(1468.8 to 2408.6) | 1684.7<br>(1291.8 to 2149.2) | 1322.4<br>(1000.5 to 1742.3) | 1404.2<br>(1014.8 to 1834.1) | 1242.9<br>(885.9 to 1792.2)  | -25.6 (-43.4 to 0.2)    | -25.9 (-44.4 to -1.3)  | -26.2 (-47.4 to 5.6)  |
|         | YLDs       | 220 (160.5 to 278.1)                | 287.1 (210 to 361.9)         | 160.9<br>(117.4 to 204.8)    | 248.1 (179.9 to 311)         | 323.9 (237.3 to 405.4)       | 175.6 (126.9 to 221.7)       | 12.8 (6.9 to 18.8)      | 12.8 (5.7 to 20.4)     | 9.1 (2.1 to 17.3)     |

| Country | Measure    | Age-standardized rate (per 100,000) |                              |                              |                              |                              |                              | % Change (1990 to 2019) |                        |                        |
|---------|------------|-------------------------------------|------------------------------|------------------------------|------------------------------|------------------------------|------------------------------|-------------------------|------------------------|------------------------|
|         |            | 1990                                |                              |                              | 2019                         |                              |                              | Both                    | Female                 | Male                   |
|         |            | Both                                | Female                       | Male                         | Both                         | Female                       | Male                         |                         |                        |                        |
| Morocco | Incidence  | 208.9<br>(191.2 to 230.2)           | 222 (201.3 to 245.1)         | 195.8<br>(178.4 to 216.7)    | 199.8 (179.8 to 222)         | 218 (194.3 to 242.4)         | 181.4 (161.4 to 202.4)       | -4.4 (-9.8 to 1.5)      | -1.8 (-9 to 6.4)       | -7.4 (-14.4 to 0)      |
|         | Prevalence | 1638.9<br>(1517 to 1774.3)          | 1826.2<br>(1688 to 1978.3)   | 1442.7<br>(1326.7 to 1568.7) | 1695.1<br>(1563.4 to 1833.2) | 1933.9<br>(1777.3 to 2096.9) | 1451.1 (1326 to 1578.6)      | 3.4 (-0.7 to 8.2)       | 5.9 (-0.1 to 12.4)     | 0.6 (-5.3 to 6.9)      |
|         | Deaths     | 132.2<br>(102.8 to 158.4)           | 132.2 (98.9 to 164)          | 132.7 (102 to 169.1)         | 116.4 (94.2 to 139.3)        | 115.8 (90.7 to 142.7)        | 117.1 (90.3 to 148.3)        | -11.9 (-29.1 to 8)      | -12.4 (-31.4 to 12)    | -11.7 (-32.6 to 11.5)  |
|         | DALYs      | 2727.6<br>(2237.6 to 3235.4)        | 2805.4<br>(2199.3 to 3452)   | 2650.6<br>(2098.7 to 3299.8) | 2257.8<br>(1838.8 to 2702.5) | 2326.5<br>(1862.9 to 2840.5) | 2189.2<br>(1716.8 to 2775.9) | -17.2 (-33.9 to 0.9)    | -17.1 (-34.6 to 4.5)   | -17.4 (-36.5 to 4)     |
|         | YLLs       | 2471.3<br>(1965.4 to 2986.8)        | 2502.3<br>(1924.2 to 3113.9) | 2443.1<br>(1879 to 3075.6)   | 1992.7<br>(1584.1 to 2446.6) | 2006.4<br>(1542 to 2524.3)   | 1980.4<br>(1507.2 to 2565.6) | -19.4 (-37.5 to 0.5)    | -19.8 (-38.9 to 3.6)   | -18.9 (-39.1 to 4.2)   |
|         | YLDs       | 256.4<br>(188.2 to 324.8)           | 303.2 (221.2 to 383.9)       | 207.6<br>(151.9 to 265.5)    | 265.1 (194.2 to 333)         | 320.1 (232.8 to 400.3)       | 208.8 (152.3 to 263.9)       | 3.4 (-1.4 to 9.1)       | 5.6 (-1.1 to 12.9)     | 0.6 (-6.5 to 7.6)      |
| Oman    | Incidence  | 218.7<br>(199.5 to 241)             | 218.7 (201.1 to 239.9)       | 220.3<br>(197.6 to 248.1)    | 196.2 (174.8 to 222.1)       | 196.7 (174.6 to 220.9)       | 197.2 (173.3 to 226.1)       | -10.3 (-15.9 to -4.6)   | -10.1 (-16.8 to -2.7)  | -10.5 (-17.5 to -2.3)  |
|         | Prevalence | 1666.8<br>(1535.5 to 1837.5)        | 1708.3<br>(1573.9 to 1868.3) | 1654<br>(1503.8 to 1846)     | 1525.6<br>(1399.9 to 1686.6) | 1620.9<br>(1485.5 to 1782.5) | 1470.3<br>(1336.8 to 1639.5) | -8.5 (-12.4 to -4.5)    | -5.1 (-10.6 to 0.5)    | -11.1 (-16.7 to -5.2)  |
|         | Deaths     | 145.7<br>(112.8 to 183)             | 132.9 (99.7 to 172.9)        | 164.6<br>(123.6 to 211.7)    | 103.7 (90.7 to 118.7)        | 96.2 (81.3 to 112.7)         | 113.6 (94.9 to 135.1)        | -28.8 (-45 to -3.7)     | -27.6 (-47.4 to 2.6)   | -31 (-48.8 to -3.5)    |
|         | DALYs      | 3071.8<br>(2428.5 to 3824)          | 2880.2<br>(2254.5 to 3648.2) | 3309.8<br>(2481.3 to 4230.7) | 1884.3<br>(1667.3 to 2127.1) | 1850.6<br>(1600.6 to 2133.9) | 1954.3<br>(1645.1 to 2297.2) | -38.7 (-51.9 to -20.7)  | -35.7 (-51.4 to -13.8) | -41 (-55.7 to -19.3)   |
|         | YLLs       | 2813.8<br>(2171.3 to 3569.2)        | 2597.3<br>(1982 to 3336.9)   | 3070.4<br>(2265.1 to 3987.7) | 1647.1<br>(1439.9 to 1874.5) | 1579.7<br>(1341.4 to 1850.4) | 1740.8<br>(1444.4 to 2086.9) | -41.5 (-55 to -21.9)    | -39.2 (-55.6 to -15.2) | -43.3 (-58.5 to -20.2) |
|         | YLDs       | 258 (187.8 to 325.9)                | 283 (204.6 to 359.2)         | 239.4<br>(173.3 to 305.9)    | 237.2 (174.1 to 301.6)       | 270.9 (199.5 to 347)         | 213.5 (154 to 271)           | -8.1 (-12.8 to -3)      | -4.3 (-10.5 to 2.8)    | -10.8 (-17.6 to -4.7)  |

| Country   | Measure    | Age-standardized rate (per 100,000) |                              |                              |                              |                              |                              | % Change (1990 to 2019) |                        |                        |
|-----------|------------|-------------------------------------|------------------------------|------------------------------|------------------------------|------------------------------|------------------------------|-------------------------|------------------------|------------------------|
|           |            | 1990                                |                              |                              | 2019                         |                              |                              | Both                    | Female                 | Male                   |
|           |            | Both                                | Female                       | Male                         | Both                         | Female                       | Male                         |                         |                        |                        |
| Palestine | Incidence  | 205.3<br>(186.9 to 227.2)           | 219.9 (198.4 to 245.9)       | 189.1<br>(170.9 to 208.4)    | 189.7 (170.1 to 212.2)       | 204.9 (181.5 to 232.3)       | 174.1 (155.7 to 195.4)       | -7.6 (-13.7 to -1.7)    | -6.8 (-15.3 to 1.3)    | -7.9 (-15.2 to -0.6)   |
|           | Prevalence | 1569.1<br>(1439.1 to 1706)          | 1757.9<br>(1608.1 to 1909.3) | 1346.3<br>(1216.9 to 1487)   | 1510.8<br>(1381.5 to 1666.5) | 1709.5<br>(1551.3 to 1891.4) | 1288.3<br>(1164.9 to 1422)   | -3.7 (-8.5 to 1.4)      | -2.8 (-9.1 to 4)       | -4.3 (-11.3 to 2.9)    |
|           | Deaths     | 172.5 (141 to 208.3)                | 167.4 (134.4 to 203.8)       | 180.5<br>(143.7 to 218.9)    | 122.4 (105.6 to 138.2)       | 120.3 (103.4 to 137.5)       | 128.2 (106.9 to 146.6)       | -29.1 (-43.5 to -10.1)  | -28.1 (-43.6 to -8.9)  | -29 (-44.2 to -8.9)    |
|           | DALYs      | 3154.1<br>(2576 to 3790.5)          | 3092.5<br>(2534.4 to 3756.6) | 3242<br>(2606.5 to 3942.7)   | 2128.3<br>(1878.2 to 2399.7) | 2125.8<br>(1871.5 to 2402.7) | 2143.7<br>(1826.8 to 2453.1) | -32.5 (-46.4 to -15)    | -31.3 (-45.2 to -14)   | -33.9 (-48.2 to -14.8) |
|           | YLLs       | 2906.5<br>(2327.1 to 3569.6)        | 2799.7<br>(2247.9 to 3452.3) | 3047.8<br>(2405.3 to 3732.9) | 1890.3<br>(1632.7 to 2140.5) | 1840.8<br>(1585.3 to 2106.6) | 1958.7<br>(1635.9 to 2263.7) | -35 (-49.6 to -16.4)    | -34.3 (-49 to -15.3)   | -35.7 (-50.5 to -15.8) |
|           | YLDs       | 247.6<br>(182.7 to 312.7)           | 292.8 (214.3 to 366.6)       | 194.2<br>(141.2 to 247.4)    | 238 (173.6 to 302.4)         | 285.1 (206.6 to 364.4)       | 185 (134.4 to 235.8)         | -3.9 (-9.4 to 1.6)      | -2.6 (-9.7 to 5.6)     | -4.7 (-13.1 to 3.7)    |
| Qatar     | Incidence  | 172 (156.7 to 190)                  | 194 (175.9 to 213.7)         | 155.9<br>(140.2 to 174.9)    | 127.1 (114.7 to 141.6)       | 153.6 (138.5 to 170.8)       | 118.5 (106.3 to 133)         | -26.1 (-30.3 to -21.7)  | -20.8 (-26.3 to -14.7) | -24 (-29.5 to -18.1)   |
|           | Prevalence | 1575.7<br>(1457.5 to 1705.2)        | 1842<br>(1703.7 to 1986.7)   | 1421.7<br>(1304.3 to 1545.9) | 1226.3<br>(1127.4 to 1327.2) | 1494.2<br>(1374.6 to 1608.3) | 1138.8<br>(1041.5 to 1238.7) | -22.2 (-25.6 to -18.9)  | -18.9 (-23.4 to -14.5) | -19.9 (-24.2 to -15.3) |
|           | Deaths     | 83.5 (63.4 to 108.7)                | 87.7 (62.1 to 113.5)         | 78.4 (60.2 to 104.9)         | 52.9 (42.5 to 69.2)          | 85.3 (67.3 to 107.4)         | 44.5 (33.8 to 60.1)          | -36.7 (-54 to -15.7)    | -2.7 (-30.9 to 40.9)   | -43.2 (-60.2 to -20)   |
|           | DALYs      | 1635.2<br>(1336.8 to 2028.2)        | 1810.5<br>(1411.2 to 2251)   | 1535.9<br>(1234 to 1994.8)   | 904.5 (747.6 to 1130.3)      | 1337.1<br>(1100.6 to 1637.6) | 777.6 (615.8 to 1012.7)      | -44.7 (-57.5 to -29.5)  | -26.1 (-44.6 to -1.3)  | -49.4 (-62.2 to -32.8) |
|           | YLLs       | 1394.8<br>(1089.9 to 1796)          | 1507.8<br>(1102.5 to 1942.9) | 1333.4<br>(1023 to 1773.9)   | 722.3 (572.2 to 941)         | 1093.5<br>(869.8 to 1382.2)  | 615.6 (462.5 to 844.9)       | -48.2 (-62 to -31)      | -27.5 (-48.5 to 4.6)   | -53.8 (-67.9 to -35.2) |
|           | YLDs       | 240.4 (176 to 302)                  | 302.7 (221.4 to 378.9)       | 202.6<br>(146.9 to 256.8)    | 182.2 (132.5 to 228.2)       | 243.6 (177.9 to 307.5)       | 162 (117.2 to 203.8)         | -24.2 (-28.2 to -19.9)  | -19.5 (-24.8 to -14.4) | -20 (-25.4 to -14)     |

| Country      | Measure    | Age-standardized rate (per 100,000) |                              |                              |                              |                              |                              | % Change (1990 to 2019) |                        |                        |
|--------------|------------|-------------------------------------|------------------------------|------------------------------|------------------------------|------------------------------|------------------------------|-------------------------|------------------------|------------------------|
|              |            | 1990                                |                              |                              | 2019                         |                              |                              | Both                    | Female                 | Male                   |
|              |            | Both                                | Female                       | Male                         | Both                         | Female                       | Male                         |                         |                        |                        |
| Saudi Arabia | Incidence  | 173.2<br>(157.5 to 188.9)           | 184.1 (166.2 to 202.2)       | 164.7<br>(149.7 to 181.5)    | 193.9 (176.5 to 213.7)       | 208.5 (189.1 to 230.9)       | 183 (165.3 to 203.9)         | 11.9 (6.7 to 18)        | 13.3 (5.8 to 22.4)     | 11.1 (3.3 to 19.2)     |
|              | Prevalence | 1823.4<br>(1631.5 to 2105.7)        | 2116.9<br>(1855.1 to 2480.5) | 1606.9<br>(1452.2 to 1828.2) | 1967.7<br>(1818.1 to 2143.5) | 2303.7<br>(2114.7 to 2542.3) | 1737.6<br>(1598.1 to 1892.9) | 7.9 (-0.1 to 15.2)      | 8.8 (-1.8 to 18.8)     | 8.1 (0.3 to 15.7)      |
|              | Deaths     | 152.2<br>(119.3 to 186.2)           | 155.6 (119.3 to 192.9)       | 149.4<br>(109.4 to 184)      | 102.7 (80.4 to 120.5)        | 103.9 (80.9 to 128.2)        | 101 (71.5 to 118.8)          | -32.5 (-49.1 to -10)    | -33.3 (-52.2 to -8)    | -32.4 (-48.6 to -7.4)  |
|              | DALYs      | 2982.3<br>(2362.6 to 3635)          | 3156.7<br>(2497.6 to 3896.3) | 2859.9<br>(2110.2 to 3582.5) | 2114.9<br>(1685.1 to 2485.5) | 2193.9<br>(1787.9 to 2684.8) | 2054.3<br>(1550.6 to 2417.9) | -29.1 (-46.4 to -5.6)   | -30.5 (-48.8 to -6.9)  | -28.2 (-46.2 to -1.7)  |
|              | YLLs       | 2703.1<br>(2094.2 to 3361.1)        | 2809.1<br>(2141.4 to 3546)   | 2631.5<br>(1898.1 to 3338.9) | 1815.5<br>(1408.2 to 2165.5) | 1814.6<br>(1398.7 to 2271.4) | 1809.4<br>(1315.1 to 2152.9) | -32.8 (-51 to -7.4)     | -35.4 (-54.6 to -9.4)  | -31.2 (-49.5 to -2.6)  |
|              | YLDs       | 279.2<br>(202.4 to 366.3)           | 347.6 (245.7 to 463.1)       | 228.4<br>(162.9 to 295.8)    | 299.4 (218.9 to 378.4)       | 379.2 (277.3 to 480.2)       | 244.9 (178 to 311.8)         | 7.2 (-1.5 to 15.6)      | 9.1 (-2 to 19.9)       | 7.2 (-1.4 to 16.4)     |
| Sudan        | Incidence  | 238.5<br>(219.3 to 261.5)           | 258.3 (235.7 to 284.5)       | 219.6<br>(200.5 to 242)      | 227.1 (205 to 253.2)         | 251.4 (224.3 to 281.3)       | 205.6 (184.8 to 230.6)       | -4.8 (-9.7 to 0.9)      | -2.7 (-9.1 to 4.2)     | -6.4 (-12.2 to 0.4)    |
|              | Prevalence | 1650.5<br>(1527.1 to 1787.5)        | 1865.9<br>(1720.9 to 2030.5) | 1447<br>(1330.1 to 1580)     | 1785.8<br>(1645.2 to 1936.9) | 2055.9<br>(1879.7 to 2248.7) | 1551.6<br>(1411.7 to 1686.8) | 8.2 (3.7 to 12.8)       | 10.2 (3.8 to 16.3)     | 7.2 (1.5 to 13.4)      |
|              | Deaths     | 177.4<br>(127.6 to 228.6)           | 183.3 (126.2 to 232.8)       | 171.7<br>(121.1 to 235.2)    | 125.2 (92.6 to 174.9)        | 133.2 (95.2 to 177.3)        | 118.3 (82.4 to 182.8)        | -29.4 (-42.2 to -12)    | -27.3 (-40 to -9.2)    | -31.1 (-46 to -11.2)   |
|              | DALYs      | 3858.9<br>(2972.6 to 4948.3)        | 4109.5<br>(3028.9 to 5205.6) | 3619<br>(2618.1 to 4954.6)   | 2585.5<br>(1970.5 to 3552.9) | 2783.9<br>(2061.8 to 3639.3) | 2415.2<br>(1713.6 to 3693.4) | -33 (-45.3 to -16.9)    | -32.3 (-44.4 to -16.2) | -33.3 (-48.2 to -13.2) |
|              | YLLs       | 3603.3<br>(2717.3 to 4677.2)        | 3801.2<br>(2704.2 to 4909.9) | 3412.7<br>(2448.8 to 4749.2) | 2309 (1690.7 to 3286.2)      | 2443.2<br>(1714.4 to 3253.6) | 2194 (1481.8 to 3466.6)      | -35.9 (-49.3 to -18.7)  | -35.7 (-48.5 to -18.9) | -35.7 (-51.6 to -14.8) |
|              | YLDs       | 255.7 (185 to 323)                  | 308.4 (224.3 to 391.1)       | 206.3<br>(147.6 to 262.4)    | 276.5 (201.3 to 351.5)       | 340.7 (248.5 to 435.3)       | 221.2 (159.2 to 279.8)       | 8.2 (2.6 to 13.3)       | 10.5 (3.1 to 17.4)     | 7.2 (-0.1 to 14.6)     |



| Country              | Measure    | Age-standardized rate (per 100,000) |                              |                              |                              |                              |                              | % Change (1990 to 2019) |                        |                        |
|----------------------|------------|-------------------------------------|------------------------------|------------------------------|------------------------------|------------------------------|------------------------------|-------------------------|------------------------|------------------------|
|                      |            | 1990                                |                              |                              | 2019                         |                              |                              | Both                    | Female                 | Male                   |
|                      |            | Both                                | Female                       | Male                         | Both                         | Female                       | Male                         |                         |                        |                        |
| Syrian Arab Republic | Incidence  | 220.3<br>(204.4 to 238.9)           | 227.4 (209.1 to 248.1)       | 214.1<br>(197.1 to 233.9)    | 179.3 (164 to 196.4)         | 187.8 (170.4 to 208.4)       | 174 (158.4 to 192.6)         | -18.6 (-22.5 to -14.7)  | -17.4 (-23.5 to -11.2) | -18.7 (-23.7 to -13.3) |
|                      | Prevalence | 1763.3<br>(1639.3 to 1893.7)        | 1873.4<br>(1735.8 to 2024.9) | 1664.2<br>(1542.6 to 1805.3) | 1518.7<br>(1403.8 to 1637.5) | 1621.3<br>(1490.9 to 1762.6) | 1425.9 (1313 to 1542.2)      | -13.9 (-17.3 to -10.5)  | -13.5 (-18.3 to -8.5)  | -14.3 (-18.8 to -9.2)  |
|                      | Deaths     | 146 (120.2 to 176.6)                | 154.6 (124.4 to 188.1)       | 138.6<br>(110.2 to 173.1)    | 99 (78.3 to 124.9)           | 112.4 (90.1 to 137.7)        | 94.4 (73.2 to 123.1)         | -32.2 (-50.2 to -8.6)   | -27.3 (-46.3 to -1.3)  | -31.9 (-51.3 to -4.3)  |
|                      | DALYs      | 3375.3<br>(2823.7 to 3954.9)        | 3343.4<br>(2777.6 to 3977.7) | 3412.6<br>(2788.6 to 4131)   | 2018.1<br>(1589.6 to 2547.1) | 2050<br>(1659.7 to 2522.7)   | 2062.1<br>(1600.6 to 2662.8) | -40.2 (-55.3 to -19.9)  | -38.7 (-53.2 to -18.5) | -39.6 (-55.6 to -16.7) |
|                      | YLLs       | 3104<br>(2569.3 to 3700.7)          | 3033.6<br>(2450.6 to 3676.8) | 3176.2<br>(2542.4 to 3889.2) | 1784 (1385.4 to 2304.3)      | 1781.8<br>(1391.9 to 2254.3) | 1860 (1415 to 2463)          | -42.5 (-58.2 to -20.6)  | -41.3 (-57 to -19.3)   | -41.4 (-58.4 to -16.7) |
|                      | YLDs       | 271.3<br>(197.6 to 341.4)           | 309.7 (227.4 to 391.6)       | 236.3<br>(172.9 to 296.7)    | 234.1 (172.3 to 295.5)       | 268.2 (198.3 to 338)         | 202.1 (147.5 to 255.6)       | -13.7 (-17.7 to -9.6)   | -13.4 (-18.8 to -7.3)  | -14.5 (-19.9 to -8)    |
| Tunisia              | Incidence  | 161.6<br>(146.8 to 177.5)           | 170.9 (153.7 to 189.4)       | 152.8<br>(138.2 to 168.8)    | 159.6 (144 to 178.9)         | 169.1 (150.9 to 190.1)       | 149.3 (133.9 to 169.2)       | -1.2 (-6.6 to 4.3)      | -1.1 (-8.1 to 6)       | -2.3 (-9.2 to 6.2)     |
|                      | Prevalence | 1032.7<br>(941.1 to 1123.3)         | 1121<br>(1021.5 to 1220.6)   | 946.9<br>(850.7 to 1041.4)   | 1260.8<br>(1162.6 to 1366)   | 1368.1<br>(1250.5 to 1484.4) | 1145.6<br>(1040.7 to 1258.2) | 22.1 (16.3 to 28.2)     | 22 (14.2 to 29.8)      | 21 (13.5 to 29.2)      |
|                      | Deaths     | 106.6 (88.9 to 126.5)               | 104.6 (84.8 to 127.5)        | 109.2 (88 to 132.1)          | 80 (60.6 to 101.4)           | 75.3 (56.3 to 95.4)          | 85.2 (62.2 to 111.9)         | -25 (-43.8 to -0.6)     | -27.9 (-46.3 to -3.8)  | -21.9 (-45.5 to 5.9)   |
|                      | DALYs      | 1961.4<br>(1663.1 to 2298.3)        | 1961.8<br>(1651.8 to 2354.9) | 1964.8<br>(1570.2 to 2368.6) | 1477.5<br>(1138.5 to 1875)   | 1418.7<br>(1102.8 to 1764.5) | 1541.2<br>(1150.5 to 2009.7) | -24.7 (-42.8 to -2)     | -27.7 (-44.7 to -5.7)  | -21.6 (-43.5 to 5.8)   |
|                      | YLLs       | 1796.9<br>(1502.7 to 2136.4)        | 1771.3<br>(1457.6 to 2158.4) | 1825.2<br>(1434.4 to 2218.2) | 1278.1<br>(957.8 to 1669)    | 1188.1<br>(897.8 to 1535.8)  | 1375.1<br>(989.2 to 1848.3)  | -28.9 (-48 to -4.6)     | -32.9 (-50.9 to -9.1)  | -24.7 (-47.4 to 5.4)   |
|                      | YLDs       | 164.5<br>(121.8 to 205.4)           | 190.6 (140.2 to 239.2)       | 139.6<br>(100.7 to 176.5)    | 199.4 (146.5 to 250.1)       | 230.6 (169.1 to 291.7)       | 166.1 (120.6 to 208.6)       | 21.2 (14.7 to 27.8)     | 21 (12.1 to 30.1)      | 19 (9.9 to 29.1)       |

| Country              | Measure    | Age-standardized rate (per 100,000) |                              |                              |                              |                              |                              | % Change (1990 to 2019) |                        |                        |
|----------------------|------------|-------------------------------------|------------------------------|------------------------------|------------------------------|------------------------------|------------------------------|-------------------------|------------------------|------------------------|
|                      |            | 1990                                |                              |                              | 2019                         |                              |                              | Both                    | Female                 | Male                   |
|                      |            | Both                                | Female                       | Male                         | Both                         | Female                       | Male                         |                         |                        |                        |
| Turkey               | Incidence  | 149.7<br>(137.7 to 163.2)           | 167.5 (153.2 to 182.7)       | 132 (120.9 to 144.4)         | 145.6 (133.4 to 160.7)       | 149.5 (136.4 to 165.5)       | 141 (128 to 157)             | -2.8 (-7.6 to 1.9)      | -10.7 (-16.3 to -4.2)  | 6.8 (-0.4 to 14.8)     |
|                      | Prevalence | 1328.5<br>(1232.1 to 1434.1)        | 1560.9<br>(1444.2 to 1685.1) | 1079 (992.8 to 1178.4)       | 1213.6<br>(1124.7 to 1309.4) | 1324.4<br>(1225.4 to 1436.5) | 1091.9<br>(1004.3 to 1184.7) | -8.7 (-12.4 to -4.6)    | -15.2 (-19.9 to -10.1) | 1.2 (-4.6 to 7.4)      |
|                      | Deaths     | 72.6 (58.2 to 96.1)                 | 71.9 (54.4 to 90.8)          | 72.9 (58.3 to 106.1)         | 60.6 (48.7 to 73.6)          | 60.1 (47.3 to 73.7)          | 60.6 (48.9 to 73.8)          | -16.5 (-39.5 to 6.2)    | -16.4 (-39.8 to 9.8)   | -16.9 (-46.2 to 13.5)  |
|                      | DALYs      | 1520.5<br>(1299.1 to 1911)          | 1513.1<br>(1248.9 to 1836)   | 1520.5<br>(1242.1 to 2299.8) | 1162.6 (965 to 1380.4)       | 1131.7<br>(939.7 to 1340.6)  | 1186.5<br>(968.8 to 1425.8)  | -23.5 (-42.5 to -5.2)   | -25.2 (-42 to -7.1)    | -22 (-47.6 to 4.7)     |
|                      | YLLs       | 1311.2<br>(1103.9 to 1713.3)        | 1255.2<br>(993.5 to 1567.4)  | 1364.1<br>(1090.4 to 2137.3) | 971.3 (778.9 to 1182.1)      | 910.9 (724.6 to 1122.1)      | 1028.1<br>(814.4 to 1264.9)  | -25.9 (-46.7 to -4.8)   | -27.4 (-47.6 to -5.3)  | -24.6 (-51.6 to 5.5)   |
|                      | YLDs       | 209.2<br>(152.9 to 261.7)           | 257.9 (188.7 to 322.7)       | 156.4<br>(114.2 to 200)      | 191.2 (139.3 to 239.6)       | 220.9 (160 to 277.3)         | 158.4 (117 to 199.8)         | -8.6 (-13.2 to -3.6)    | -14.4 (-20.1 to -8)    | 1.3 (-6.5 to 8.7)      |
| United Arab Emirates | Incidence  | 307.6<br>(277.8 to 340.6)           | 332.4 (297.7 to 372.3)       | 292 (261.1 to 324.5)         | 262.2 (233.8 to 294.3)       | 287.5 (257.2 to 324.2)       | 250.5 (221 to 281.9)         | -14.8 (-19.2 to -9.9)   | -13.5 (-20.5 to -6.1)  | -14.2 (-20.6 to -8)    |
|                      | Prevalence | 2405.6<br>(2215 to 2643.8)          | 2711.8<br>(2489.9 to 2988.1) | 2243<br>(2047.8 to 2486.8)   | 2225.7<br>(2037.3 to 2436.3) | 2563.5<br>(2362.4 to 2805)   | 2096.7 (1909 to 2309.9)      | -7.5 (-11.6 to -3.6)    | -5.5 (-10.6 to -0.1)   | -6.5 (-12 to -1.1)     |
|                      | Deaths     | 182.5<br>(145.5 to 246.2)           | 195.6 (152 to 260.3)         | 174.2<br>(128.4 to 243.6)    | 91.3 (70.2 to 118.7)         | 89.1 (68.8 to 118)           | 92.4 (69 to 119.9)           | -50 (-62 to -34.9)      | -54.5 (-66 to -37)     | -46.9 (-61.1 to -26.4) |
|                      | DALYs      | 3565.6<br>(2877.6 to 4746.3)        | 3825.2<br>(3034.8 to 4985.8) | 3446.6<br>(2583.8 to 4747.3) | 1925.6 (1517 to 2457.9)      | 1955.3<br>(1575.1 to 2440.1) | 1920.6 (1479 to 2455.9)      | -46 (-58.5 to -30.5)    | -48.9 (-61.1 to -31.7) | -44.3 (-59.1 to -23.5) |
|                      | YLLs       | 3191.1<br>(2499.9 to 4322.8)        | 3368.8<br>(2590.5 to 4527.3) | 3119.5<br>(2249 to 4437.6)   | 1589.3 (1200 to 2106.9)      | 1530.2<br>(1168.6 to 2022.2) | 1619.5<br>(1182.6 to 2163)   | -50.2 (-63.3 to -33.3)  | -54.6 (-66.7 to -35.8) | -48.1 (-63.1 to -25.1) |
|                      | YLDs       | 374.4<br>(275.4 to 475.6)           | 456.4 (334.5 to 580.6)       | 327.1<br>(238.7 to 414.4)    | 336.4 (245.1 to 425.6)       | 425.1 (312.2 to 537)         | 301.1 (217.3 to 383.9)       | -10.2 (-14.8 to -5.7)   | -6.9 (-13 to -0.6)     | -7.9 (-14.2 to -1.6)   |

| Country | Measure    | Age-standardized rate (per 100,000) |                           |                           |                           |                         |                           | % Change (1990 to 2019) |                      |                       |
|---------|------------|-------------------------------------|---------------------------|---------------------------|---------------------------|-------------------------|---------------------------|-------------------------|----------------------|-----------------------|
|         |            | 1990                                |                           |                           | 2019                      |                         |                           | Both                    | Female               | Male                  |
|         |            | Both                                | Female                    | Male                      | Both                      | Female                  | Male                      |                         |                      |                       |
| Yemen   | Incidence  | 229.7 (212 to 249.6)                | 236.3 (216.7 to 259)      | 223 (204.7 to 243.6)      | 207.9 (190.1 to 228.3)    | 219.1 (198.4 to 241.9)  | 196.4 (178.4 to 218.4)    | -9.5 (-14 to -4.7)      | -7.3 (-13.4 to -0.8) | -11.9 (-17.7 to -5.6) |
|         | Prevalence | 1596.2 (1482.1 to 1716.9)           | 1715.1 (1595.3 to 1852)   | 1455.7 (1340.2 to 1590.7) | 1609.4 (1480.2 to 1745.5) | 1783.3 (1632 to 1944.4) | 1430.6 (1307.3 to 1558)   | 0.8 (-4.2 to 5.7)       | 4 (-2.3 to 11.1)     | -1.7 (-7.8 to 4.3)    |
|         | Deaths     | 174.2 (121.5 to 227.9)              | 172.3 (115.6 to 227)      | 177.7 (123.9 to 232.4)    | 135.7 (102.4 to 176.6)    | 138.4 (103.4 to 179.8)  | 132.8 (97.8 to 176.6)     | -22.1 (-38.2 to 0.7)    | -19.7 (-36.3 to 7.5) | -25.3 (-41.3 to -2.4) |
|         | DALYs      | 3663.8 (2666.7 to 4746.9)           | 3689.1 (2612.8 to 4814.4) | 3651.9 (2664.7 to 4784.8) | 2765.5 (2161.6 to 3520.5) | 2860.3 (2209 to 3665.2) | 2667.9 (2012.3 to 3583.2) | -24.5 (-41 to -1.9)     | -22.5 (-38.9 to 3.5) | -26.9 (-44 to -2.4)   |
|         | YLLs       | 3417.1 (2433.1 to 4490.4)           | 3408.6 (2334.9 to 4528.7) | 3444.7 (2472.5 to 4563.6) | 2515.8 (1917 to 3278.3)   | 2566.9 (1911.7 to 3379) | 2463.3 (1816.6 to 3352.6) | -26.4 (-43.7 to -2.2)   | -24.7 (-42 to 3.4)   | -28.5 (-46.2 to -2.5) |
|         | YLDs       | 246.7 (179.6 to 310.9)              | 280.4 (206 to 355.2)      | 207.3 (150.2 to 263)      | 249.6 (183.1 to 315.4)    | 293.4 (213.4 to 371.2)  | 204.6 (149.7 to 257)      | 1.2 (-4.2 to 7)         | 4.6 (-2.1 to 12.4)   | -1.3 (-8.2 to 6)      |

Data in parentheses are 95% Uncertainty Intervals (95% UIs)

DALYs=Disability-Adjusted Life Years; YLLs=Years of Life Lost; YLDs=Years Lived with Disability
