# Supplementary material for: Burden of stroke in North Africa and Middle East, 1990 to 2019: a systematic analysis for the global burden of disease study 2019
Source: Springer Nature journal article supplement (doi:10.1186/s12883-022-02793-0), 2022-07-27
Supplement: MOESM4 [file 23310060]

| Location                     | Risk factor                          | Measure                | 1990                      |                           |                           | 2019                      |                           |                           | % Change (1990 to 2019) |                          |                        |
|------------------------------|--------------------------------------|------------------------|---------------------------|---------------------------|---------------------------|---------------------------|---------------------------|---------------------------|-------------------------|--------------------------|------------------------|
|                              |                                      |                        | Both                      | Female                    | Male                      | Both                      | Female                    | Male                      | Both                    | Female                   | Male                   |
| North Africa and Middle East | All risk factors                     | Deaths                 | 98.9 (83.4 to 112.4)      | 100 (82.8 to 115.1)       | 97.3 (83.7 to 119.8)      | 74.3 (65.5 to 84.4)       | 76.6 (66.5 to 87)         | 72 (63.2 to 83.1)         | -24.9 (-33.5 to -11.6)  | -23.4 (-32.5 to -7.3)    | -26.1 (-37.2 to -13.2) |
|                              |                                      | DALYs                  | 2112.9 (1846.3 to 2382.6) | 2148.6 (1852.9 to 2418.8) | 2072.4 (1804.7 to 2486)   | 1566.9 (1393.2 to 1757.1) | 1602.7 (1419.3 to 1798.2) | 1530.7 (1345 to 1746.4)   | -25.8 (-34.1 to -14)    | -25.4 (-33.9 to -12.3)   | -26.1 (-36.8 to -13.5) |
|                              |                                      | YLLs                   | 1909.3 (1647.4 to 2174.2) | 1905.8 (1625.1 to 2166.3) | 1907.7 (1648.8 to 2343.1) | 1359.2 (1198.9 to 1548.9) | 1358 (1182.6 to 1543.5)   | 1358.4 (1179.9 to 1577.9) | -28.8 (-37.9 to -15.8)  | -28.7 (-37.8 to -14.4)   | -28.8 (-39.7 to -15.5) |
|                              |                                      | YLDs                   | 203.6 (148.4 to 259)      | 242.9 (177.3 to 307.8)    | 164.7 (119.8 to 211.3)    | 207.7 (152.1 to 263.7)    | 244.7 (179.4 to 309.5)    | 172.2 (125.3 to 217.8)    | 2 (-0.3 to 4.4)         | 0.8 (-2 to 3.8)          | 4.5 (1.6 to 7.6)       |
|                              | Alcohol use                          | Deaths                 | 0.5 (0.2 to 0.8)          | 0 (-0.1 to 0.2)           | 1 (0.5 to 1.4)            | 0.2 (0.1 to 0.4)          | 0 (-0.2 to 0.1)           | 0.5 (0.2 to 0.8)          | -54.7 (-78.2 to -35.6)  | -187 (-931.6 to 1078)    | -50.3 (-67.4 to -33.4) |
|                              |                                      | DALYs                  | 16.3 (9.1 to 23.4)        | 2.4 (-1.8 to 7)           | 29.7 (17 to 43.3)         | 7.7 (3.2 to 12.3)         | -0.1 (-2.8 to 3.1)        | 14.9 (7.3 to 23.4)        | -52.9 (-69.5 to -37.4)  | -102.8 (-796.6 to 518.7) | -49.7 (-64.4 to -34.2) |
|                              |                                      | YLLs                   | 15.4 (8.8 to 22.2)        | 2.5 (-1.2 to 6.6)         | 27.9 (16 to 40.8)         | 7.1 (3.2 to 11.4)         | 0.2 (-2 to 2.8)           | 13.5 (6.8 to 21.2)        | -54.3 (-69.4 to -39.1)  | -91.7 (-510 to 313.3)    | -51.6 (-65.5 to -36.3) |
|                              |                                      | YLDs                   | 0.8 (0.2 to 1.4)          | -0.2 (-0.7 to 0.5)        | 1.8 (0.8 to 2.9)          | 0.6 (0 to 1.2)            | -0.3 (-0.8 to 0.3)        | 1.4 (0.4 to 2.5)          | -27.5 (-90.9 to 3.1)    | 70.3 (-621 to 646.5)     | -20 (-50.1 to -1.7)    |
|                              | Ambient particulate matter pollution | Deaths                 | 18.8 (14.6 to 24)         | 17.8 (13.7 to 22.7)       | 19.7 (15.3 to 25.2)       | 19.3 (16.1 to 22.8)       | 19.1 (15.9 to 22.7)       | 19.4 (16 to 23.1)         | 2.4 (-15.9 to 26.2)     | 7 (-13.2 to 35)          | -1.8 (-21 to 21.3)     |
|                              |                                      | DALYs                  | 453.5 (356.5 to 572)      | 431.8 (333.8 to 545.6)    | 474 (366.6 to 605.5)      | 466.4 (391.1 to 553.9)    | 461.6 (382.5 to 549.4)    | 470.5 (390.7 to 563.6)    | 2.8 (-14.7 to 26.1)     | 6.9 (-13 to 33.7)        | -0.7 (-19 to 22.9)     |
|                              |                                      | YLLs                   | 404.6 (315.6 to 511)      | 375.8 (288.1 to 481.5)    | 432 (334.6 to 556.2)      | 399.1 (331.1 to 477.7)    | 383.4 (315.9 to 458.2)    | 413.6 (339.1 to 502.7)    | -1.3 (-19.7 to 22.8)    | 2 (-18 to 29.2)          | -4.3 (-23.2 to 20.2)   |
|                              |                                      | YLDs                   | 48.9 (33.6 to 66.1)       | 56 (38.3 to 75.9)         | 41.9 (28.6 to 57.2)       | 67.3 (47.1 to 86.3)       | 78.2 (54.8 to 100.9)      | 56.9 (39.9 to 72.9)       | 37.6 (22.3 to 61)       | 39.5 (23.4 to 66.5)      | 35.8 (20.6 to 58.3)    |
|                              | Diet high in red meat                | Deaths                 | 3.5 (1.4 to 5.5)          | 3.5 (1.4 to 5.6)          | 3.5 (1.4 to 5.4)          | 2.4 (0.9 to 3.8)          | 2.5 (0.9 to 3.9)          | 2.4 (0.9 to 3.8)          | -31.4 (-49.9 to -11.3)  | -30.7 (-51.7 to -8)      | -32 (-48.9 to -13)     |
|                              |                                      | DALYs                  | 95.6 (37.1 to 145.9)      | 97.8 (37.7 to 149.6)      | 93.4 (35.9 to 144.1)      | 66 (25.9 to 102.1)        | 67.2 (26.5 to 104.8)      | 64.9 (25 to 100.7)        | -30.9 (-48 to -10)      | -31.3 (-50.6 to -9)      | -30.5 (-46.6 to -10.9) |
|                              |                                      | YLLs                   | 85.5 (32.2 to 131.1)      | 85.7 (32.5 to 131.8)      | 85.2 (32.2 to 132.4)      | 56 (22 to 88.1)           | 55.4 (22.3 to 88.4)       | 56.5 (22.3 to 88.3)       | -34.5 (-50.7 to -13.1)  | -35.4 (-53.9 to -11.5)   | -33.7 (-48.9 to -13.4) |
|                              |                                      | YLDs                   | 10.1 (3.5 to 16.6)        | 12.1 (4.1 to 19.9)        | 8.2 (2.9 to 13.4)         | 10 (3.1 to 16.6)          | 11.8 (3.7 to 19.6)        | 8.4 (2.7 to 13.8)         | -1 (-13.8 to 6.6)       | -2.4 (-16.8 to 6)        | 1.6 (-10.8 to 9.2)     |
|                              | Diet high in sodium                  | Deaths                 | 1.9 (0.4 to 8)            | 1.4 (0.4 to 5.6)          | 2.5 (0.3 to 10.3)         | 1.4 (0.3 to 5.4)          | 1 (0.3 to 3.8)            | 1.8 (0.2 to 7.1)          | -29.4 (-42 to -7.5)     | -30.1 (-46.5 to -4.6)    | -29.7 (-43.1 to 2.8)   |
|                              |                                      | DALYs                  | 47.2 (7.8 to 192.7)       | 33.3 (9.3 to 134.4)       | 60.8 (5.4 to 240.1)       | 33.6 (5.8 to 133.3)       | 23.2 (6.9 to 94.8)        | 43.6 (4.2 to 169.4)       | -28.8 (-40.4 to -8.7)   | -30.5 (-45.7 to -6.8)    | -28.4 (-40.3 to 1.2)   |
|                              |                                      | YLLs                   | 42.9 (6.9 to 177.3)       | 29.6 (8.1 to 120.6)       | 55.9 (5 to 223)           | 29.2 (5 to 116.1)         | 19.5 (5.8 to 79.9)        | 38.5 (3.7 to 149)         | -31.8 (-44 to -11.2)    | -34 (-49.4 to -10.1)     | -31.1 (-43.3 to -1.4)  |
|                              |                                      | YLDs                   | 4.3 (0.7 to 17.3)         | 3.8 (1 to 15.1)           | 4.9 (0.4 to 19.2)         | 4.4 (0.7 to 17.1)         | 3.6 (1 to 14.7)           | 5.1 (0.4 to 19.5)         | 0.8 (-14.6 to 21.9)     | -3.2 (-24 to 23.5)       | 3.5 (-9.7 to 39.4)     |
|                              | Diet low in fiber                    | Deaths                 | 2.4 (0.6 to 4.5)          | 2.4 (0.6 to 4.5)          | 2.4 (0.6 to 4.5)          | 1.5 (0.4 to 2.7)          | 1.5 (0.4 to 2.8)          | 1.4 (0.4 to 2.6)          | -38.8 (-46.4 to -27.2)  | -36.7 (-45.7 to -22)     | -40.8 (-48.5 to -29)   |
|                              |                                      | DALYs                  | 56.7 (13 to 107.3)        | 58.4 (13.3 to 111)        | 55.1 (12.9 to 105.1)      | 36.2 (9.2 to 66.7)        | 38.1 (9.8 to 70)          | 34.5 (8.7 to 64.3)        | -36.1 (-44 to -23.8)    | -34.6 (-44.2 to -19.2)   | -37.4 (-45.5 to -24.7) |
|                              |                                      | YLLs                   | 51.4 (11.9 to 98.5)       | 52.2 (12 to 99.2)         | 50.7 (11.8 to 97.2)       | 31.7 (8 to 58.5)          | 32.7 (8.3 to 60.1)        | 30.7 (7.7 to 56.9)        | -38.4 (-46.7 to -25.3)  | -37.3 (-47.3 to -20.8)   | -39.5 (-47.8 to -26.3) |
|                              |                                      | YLDs                   | 5.3 (1.2 to 10.4)         | 6.2 (1.4 to 12.1)         | 4.4 (1 to 8.6)            | 4.6 (1.1 to 8.9)          | 5.4 (1.3 to 10.6)         | 3.8 (0.9 to 7.4)          | -13.1 (-16.8 to -5.6)   | -12.2 (-17.4 to -2.8)    | -13.4 (-18.8 to -4.9)  |
|                              | Diet low in fruits                   | Deaths                 | 5.1 (2.7 to 8.3)          | 5.3 (2.8 to 8.6)          | 4.9 (2.6 to 8)            | 2.6 (1.3 to 4.2)          | 2.7 (1.3 to 4.4)          | 2.5 (1.2 to 4)            | -49.5 (-60.6 to -37.3)  | -48.9 (-60.7 to -34)     | -49.9 (-60.7 to -37.6) |
|                              |                                      | DALYs                  | 132.9 (70.6 to 216)       | 141.1 (74.8 to 227.7)     | 124.9 (65.8 to 203.9)     | 70.5 (35.4 to 112.5)      | 74.7 (37.3 to 119)        | 66.5 (33.8 to 109.2)      | -47 (-58.1 to -34.3)    | -47.1 (-59.2 to -32.8)   | -46.7 (-57.6 to -34.7) |
|                              |                                      | YLLs                   | 121.1 (65.8 to 197.3)     | 126.7 (68.4 to 204.9)     | 115.7 (61.3 to 189.5)     | 61.5 (31.8 to 98.6)       | 63.8 (32.3 to 101.3)      | 59.4 (30.6 to 97.1)       | -49.2 (-59.9 to -36.1)  | -49.7 (-61.2 to -34.8)   | -48.7 (-59.3 to -35.9) |
|                              |                                      | YLDs                   | 11.8 (4.8 to 20.7)        | 14.4 (5.9 to 25.2)        | 9.2 (3.8 to 16.4)         | 9 (3.6 to 15.6)           | 10.9 (4.3 to 19.1)        | 7.2 (2.9 to 12.6)         | -23.8 (-30.8 to -17.7)  | -24.1 (-32.3 to -17.1)   | -22.6 (-29.5 to -16)   |
|                              | Diet low in vegetables               | Deaths                 | 2.7 (1.1 to 4.4)          | 2.7 (1.1 to 4.4)          | 2.7 (1.1 to 4.5)          | 1.2 (0.5 to 2)            | 1.3 (0.6 to 2.1)          | 1.2 (0.5 to 2)            | -53.2 (-63.5 to -38.7)  | -51.8 (-62.8 to -35)     | -54.6 (-64.5 to -40.8) |
|                              |                                      | DALYs                  | 64.2 (23.9 to 107.8)      | 66.5 (25.8 to 112.3)      | 62.1 (24.1 to 106.6)      | 31.1 (13.4 to 50.9)       | 32.8 (14.6 to 54.4)       | 29.5 (12.7 to 48.9)       | -51.6 (-61.6 to -36.8)  | -50.6 (-61.2 to -33.9)   | -52.4 (-62.2 to -38.1) |
|                              |                                      | YLLs                   | 59.3 (21.7 to 100.9)      | 60.7 (23.4 to 103.6)      | 57.9 (21.6 to 100.8)      | 27.6 (11.9 to 44.9)       | 28.8 (12.8 to 47.2)       | 26.6 (11.2 to 44.9)       | -53.4 (-63.1 to -38.3)  | -52.5 (-63 to -35.3)     | -54.1 (-63.7 to -39.8) |
|                              |                                      | YLDs                   | 5 (1.9 to 8.7)            | 5.8 (2.2 to 10)           | 4.2 (1.5 to 7.3)          | 3.5 (1.3 to 6.1)          | 4 (1.5 to 7)              | 3 (1.1 to 5.2)            | -30.2 (-37.3 to -21)    | -30.8 (-38.2 to -20.8)   | -28.8 (-36.3 to -19.6) |
| Diet low in whole grains     | Deaths                               | 5.1 (2.7 to 6.9)       | 5.2 (2.9 to 7)            | 5 (2.6 to 6.9)            | 4.6 (2.5 to 6.1)          | 4.9 (2.6 to 6.4)          | 4.4 (2.3 to 6)            | -9.2 (-21.3 to 3.9)       | -6.3 (-17.4 to 12.8)    | -11.4 (-28.9 to 2)       |                        |
|                              | DALYs                                | 105 (52.1 to 141.3)    | 107.6 (55.4 to 145.6)     | 102 (49.4 to 141)         | 96.7 (46.5 to 131.4)      | 101.6 (49.5 to 136.3)     | 91.9 (43.3 to 126.3)      | -8 (-19.2 to 3.7)         | -5.6 (-16.3 to 8.6)     | -9.9 (-26.9 to 3.1)      |                        |
|                              | YLLs                                 | 88.2 (44 to 120)       | 87.4 (45.3 to 118.5)      | 88.6 (42.8 to 122.7)      | 79.3 (38.8 to 107.1)      | 80.8 (40.9 to 109.5)      | 77.8 (37.3 to 107.8)      | -10.1 (-23.1 to 3.5)      | -7.5 (-20 to 10.3)      | -12.2 (-30.5 to 2.6)     |                        |
|                              | YLDs                                 | 16.8 (7.8 to 25.1)     | 20.3 (9.5 to 30.1)        | 13.4 (6.1 to 20.2)        | 17.3 (7.7 to 25.9)        | 20.8 (9.4 to 30.8)        | 14.1 (6.2 to 21)          | 3.1 (-0.3 to 5.8)         | 2.4 (-1.3 to 5.7)       | 5 (0.9 to 8.3)           |                        |
| High body-mass index         | Deaths                               | 21 (12.8 to 30.1)      | 24.6 (15.9 to 34.4)       | 17.5 (9.7 to 26.5)        | 20 (13.3 to 28.2)         | 21.5 (14.7 to 30.1)       | 18.5 (11.8 to 26.6)       | -5.1 (-21.8 to 19.4)      | -12.7 (-27.7 to 7.9)    | 5.6 (-17 to 42.8)        |                        |
|                              | DALYs                                | 658.8 (430.2 to 907)   | 777.1 (537.9 to 1035.1)   | 544.5 (320.9 to 790.2)    | 618 (440.1 to 822.7)      | 664.6 (484.5 to 874.4)    | 573.2 (389.4 to 777.6)    | -6.2 (-21.8 to 16.6)      | -14.5 (-28.3 to 2.6)    | 5.3 (-17 to 41.3)        |                        |
|                              | YLLs                                 | 588.2 (380 to 811.4)   | 681.4 (468 to 916.3)      | 498.1 (292.7 to 728.7)    | 525.8 (369.6 to 701.4)    | 549.3 (394 to 725.5)      | 502.7 (339.3 to 689.8)    | -10.6 (-26.8 to 12.4)     | -19.4 (-33.5 to -1)     | 0.9 (-20.9 to 37.6)      |                        |
|                              | YLDs                                 | 70.5 (42.5 to 105.3)   | 95.7 (60.3 to 138.7)      | 46.4 (25.5 to 73.6)       | 92.2 (60.2 to 130)        | 115.3 (76.6 to 160.1)     | 70.5 (44.3 to 102.1)      | 30.8 (19.5 to 49.8)       | 20.5 (11.5 to 34.7)     | 52 (32.1 to 90.9)        |                        |
| High fasting plasma glucose  | Deaths                               | 19.6 (11.9 to 34.6)    | 20.4 (12 to 37.9)         | 18.6 (11.5 to 30.4)       | 25.5 (14.8 to 45.2)       | 26.5 (15.2 to 48.1)       | 24.5 (14.1 to 42.7)       | 30.3 (2.9 to 59.5)        | 30.1 (0.9 to 64)        | 31.6 (2.7 to 62.7)       |                        |
|                              | DALYs                                | 374.5 (248.6 to 576.4) | 389.2 (249.9 to 613.2)    | 358.1 (241.8 to 542.7)    | 504.9 (318.8 to 793.9)    | 524 (331.6 to 820.2)      | 485.7 (302 to 760.7)      | 34.8 (7.9 to 64.8)        | 34.6 (6.6 to 72.3)      | 35.6 (7.5 to 67.2)       |                        |
|                              | YLLs                                 | 339.2 (224.1 to 519.5) | 346.7 (223.1 to 552.9)    | 330.2 (222.7 to 500.1)    | 440 (281 to 703.7)        | 447.3 (283.1 to 707.6)    | 432.4 (271.4 to 687.1)    | 29.7 (2.1 to 59.3)        | 29 (1 to 67.3)          | 31 (3.2 to 62.9)         |                        |
|                              | YLDs                                 | 35.3 (20.4 to 59.1)    | 42.5 (24.1 to 71.9)       | 28 (16.3 to 45.9)         | 64.9 (35.8 to 106.8)      | 76.7 (42.8 to 125.9)      | 53.4 (29.2 to 86.1)       | 83.9 (61.9 to 112.3)      | 80.5 (56.2 to 110.8)    | 90.9 (65 to 120.5)       |                        |
| High LDL cholesterol         | Deaths                               | 12.8 (4.7 to 27.2)     | 13.4 (4.8 to 29.1)        | 12 (4.7 to 24.5)          | 12.2 (4.7 to 25.1)        | 13.2 (4.9 to 27.2)        | 11.2 (4.5 to 22.3)        | -4.7 (-18.3 to 10.5)      | -1.7 (-14.6 to 18.8)    | -6.8 (-25 to 9.6)        |                        |
|                              | DALYs                                | 277.1 (159.3 to 469.3) | 293.4 (166.4 to 505.5)    | 259.6 (150.5 to 425.8)    | 274.7 (160.6 to 448.1)    | 297.1 (172.7 to 492.4)    | 253 (150.5 to 410.9)      | -0.9 (-14 to 13.7)        | 1.2 (-10.7 to 18.8)     | -2.5 (-20.5 to 13.8)     |                        |
|                              | YLLs                                 | 229 (124.2 to 398.7)   | 233.7 (124.1 to 423.1)    | 222.8 (125 to 374.1)      | 222 (126.5 to 376.2)      | 232.3 (127.5 to 404.6)    | 211.6 (122.5 to 349.4)    | -3.1 (-18.6 to 14.5)      | -0.6 (-15.8 to 21.9)    | -5 (-24.8 to 14.2)       |                        |
|                              | YLDs                                 | 48.1 (28.9 to 78.1)    | 59.7 (36.4 to 96.9)       | 36.8 (21.7 to 59.6)       | 52.7 (32.1 to 84.9)       | 64.7 (39.5 to 105.4)      | 41.3 (25.1 to 66.5)       | 9.5 (6.7 to 12.8)         | 8.5 (5.4 to 12.1)       | 12.4 (8.3 to 16.9)       |                        |
| High systolic                | Deaths                               | 58.7 (46.7 to 71.7)    | 62 (48.5 to 77.1)         | 54.9 (43.4 to 69)         | 44 (35.1 to 53.5)         | 46.7 (36.5 to 57.4)       | 41.2 (32.6 to 51)         | -25.2 (-35.3 to -10.7)    | -24.7 (-35.4 to -7.7)   | -25 (-36.4 to -10.7)     |                        |

| Location         | Risk factor                              | Measure               | 1990                      |                           |                           | 2019                      |                         |                           | % Change (1990 to 2019) |                        |                        |
|------------------|------------------------------------------|-----------------------|---------------------------|---------------------------|---------------------------|---------------------------|-------------------------|---------------------------|-------------------------|------------------------|------------------------|
|                  |                                          |                       | Both                      | Female                    | Male                      | Both                      | Female                  | Male                      | Both                    | Female                 | Male                   |
|                  | Blood pressure                           | DALYs                 | 1285.3 (1054.8 to 1530.5) | 1357.3 (1111.3 to 1621.8) | 1209.5 (979 to 1488.9)    | 965 (800.6 to 1143.2)     | 1009 (821.8 to 1196.7)  | 920.4 (751 to 1103.3)     | -24.9 (-34.3 to -12)    | -25.7 (-35.4 to -11.1) | -23.9 (-35.1 to -9.4)  |
|                  |                                          | YLLs                  | 1161.4 (939.6 to 1395.2)  | 1205.1 (969.5 to 1453.9)  | 1113.7 (894.6 to 1388.8)  | 836.8 (686.5 to 998.2)    | 855.8 (692.9 to 1021.3) | 816.5 (662.3 to 988.7)    | -27.9 (-37.6 to -13.9)  | -29 (-39.3 to -13.5)   | -26.7 (-38.3 to -11.6) |
|                  |                                          | YLDs                  | 123.9 (87.8 to 162.5)     | 152.1 (108.4 to 199.3)    | 95.9 (67.7 to 127)        | 128.2 (90.9 to 167.2)     | 153.3 (108.6 to 200.3)  | 103.9 (73 to 136)         | 3.5 (-0.6 to 7.9)       | 0.7 (-4.4 to 6.5)      | 8.4 (3.5 to 13.8)      |
|                  | High temperature                         | Deaths                | 1.8 (0.2 to 4)            | 1.8 (0.2 to 4.1)          | 1.8 (0.2 to 4)            | 1.5 (0.5 to 2.9)          | 1.5 (0.5 to 2.9)        | 1.5 (0.5 to 3)            | -16.8 (-52.5 to 47.8)   | -17.6 (-53.6 to 50.9)  | -15.9 (-53.5 to 44.8)  |
|                  |                                          | YLLs                  | 37.3 (3.8 to 86.3)        | 36.6 (3.7 to 84.7)        | 37.8 (3.9 to 87.2)        | 29.4 (10.2 to 59.3)       | 28 (9.3 to 56.5)        | 30.7 (10.6 to 61.6)       | -21.2 (-59.9 to 33.6)   | -23.7 (-58.8 to 36)    | -18.9 (-57.7 to 38.5)  |
|                  |                                          | YLDs                  | 15 (9.9 to 21.5)          | 16.5 (10.8 to 23.3)       | 13.4 (8.5 to 19.8)        | 2.6 (1.7 to 3.7)          | 3.1 (2.1 to 4.4)        | 2.1 (1.2 to 3.2)          | -82.7 (-86 to -78.6)    | -80.9 (-84.6 to -76.1) | -84.6 (-88 to -80.5)   |
|                  | Household air pollution from solid fuels | Deaths                | 350.7 (238.1 to 487.3)    | 394.6 (271.3 to 542.6)    | 307.4 (196.5 to 440.6)    | 66.8 (44.8 to 93.1)       | 83.4 (57.4 to 115.7)    | 51.3 (31.2 to 77.4)       | -80.9 (-84.8 to -76.1)  | -78.9 (-83.2 to -73.6) | -83.3 (-87 to -78.7)   |
|                  |                                          | DALYs                 | 321.5 (216.2 to 446.5)    | 357.2 (240.8 to 491.1)    | 286.1 (182.2 to 411.8)    | 60.6 (40.3 to 85.3)       | 75.1 (50.8 to 106.2)    | 47 (28.4 to 71.6)         | -81.1 (-85.1 to -76.1)  | -79 (-83.5 to -73.4)   | -83.6 (-87.3 to -78.9) |
|                  |                                          | YLLs                  | 29.3 (18.4 to 42.6)       | 37.4 (23.6 to 54.5)       | 21.3 (12.9 to 31.9)       | 6.2 (4 to 8.8)            | 8.3 (5.5 to 11.7)       | 4.3 (2.5 to 6.5)          | -78.7 (-81.8 to -75.1)  | -77.8 (-80.8 to -74.3) | -79.9 (-83.1 to -76.2) |
|                  | Kidney dysfunction                       | Deaths                | 9 (6.6 to 11.8)           | 9.8 (6.9 to 13.1)         | 8.2 (6.1 to 10.5)         | 9.3 (6.2 to 12.2)         | 9.8 (6.4 to 13.3)       | 8.7 (5.9 to 11.5)         | 3 (-15.8 to 24.8)       | 0.3 (-20.1 to 26)      | 7 (-14.4 to 27.3)      |
|                  |                                          | DALYs                 | 194.6 (155 to 238.3)      | 215.4 (169.5 to 268)      | 173.5 (137.8 to 214.2)    | 200.8 (155.6 to 247.9)    | 216.2 (164.6 to 268.5)  | 185.9 (143 to 230.8)      | 3.2 (-12.2 to 21.1)     | 0.4 (-15.8 to 22.1)    | 7.1 (-10.9 to 26.3)    |
|                  |                                          | YLLs                  | 173.5 (138.2 to 215.9)    | 188.4 (147.4 to 239.1)    | 158.4 (124.9 to 198.8)    | 172.1 (131.3 to 214.2)    | 180.7 (135.1 to 227.9)  | 163.6 (124.1 to 205.5)    | -0.9 (-17.1 to 19)      | -4.1 (-21.2 to 20.2)   | 3.3 (-15 to 23.8)      |
|                  | Lead exposure                            | Deaths                | 21 (14.3 to 28.1)         | 27 (18.4 to 36.1)         | 15.1 (10.2 to 20.2)       | 28.8 (19.6 to 38.8)       | 35.5 (24.3 to 47.9)     | 22.3 (15 to 30)           | 36.9 (29.3 to 43.8)     | 31.5 (24.5 to 38)      | 47.2 (37.2 to 56.3)    |
|                  |                                          | DALYs                 | 6.9 (4.4 to 9.8)          | 5.8 (3.4 to 8.4)          | 8 (5.3 to 11.4)           | 4.6 (2.9 to 6.7)          | 4 (2.2 to 6)            | 5.3 (3.4 to 7.4)          | -33 (-44 to -20.6)      | -31.7 (-43.3 to -16.4) | -34.1 (-44.8 to -22.7) |
|                  |                                          | YLLs                  | 161.3 (103.9 to 224.5)    | 135.1 (79 to 195.5)       | 186.8 (126.2 to 261.8)    | 95.5 (57.8 to 137.7)      | 81.3 (45.3 to 122.9)    | 109.3 (69.3 to 153.2)     | -40.8 (-50.5 to -30.4)  | -39.8 (-50.4 to -27.9) | -41.5 (-50.9 to -30.7) |
|                  | Low physical activity                    | Deaths                | 147.5 (94.7 to 207.2)     | 121.5 (72 to 177.2)       | 173 (115.7 to 243.7)      | 84.7 (51.7 to 121.2)      | 70.7 (39.6 to 106.7)    | 98.2 (62.3 to 138.7)      | -42.6 (-52.6 to -31.5)  | -41.8 (-52.4 to -28.5) | -43.3 (-52.7 to -31.9) |
|                  |                                          | DALYs                 | 13.7 (7.8 to 21)          | 13.6 (7.2 to 21.8)        | 13.8 (8.4 to 20.5)        | 10.9 (5.9 to 17.1)        | 10.6 (5.2 to 17.5)      | 11.1 (6.3 to 17)          | -20.8 (-29 to -15)      | -22.2 (-30.8 to -16)   | -19.5 (-27.6 to -13.6) |
|                  |                                          | YLLs                  | 5.8 (1.3 to 12.2)         | 6 (1.5 to 12.2)           | 5.6 (1.1 to 12)           | 5.6 (1.3 to 11.6)         | 6 (1.5 to 12.1)         | 5.2 (1 to 10.9)           | -3.2 (-15.8 to 12.7)    | 0 (-13 to 20.1)        | -5.9 (-22.5 to 9.5)    |
|                  | Low temperature                          | Deaths                | 90.6 (19.1 to 204.6)      | 95.2 (22.1 to 208)        | 85.6 (16.2 to 198)        | 91.7 (18.8 to 203.4)      | 98.9 (22.9 to 211.8)    | 84.7 (15.5 to 189.5)      | 1.2 (-11.8 to 16)       | 3.9 (-10.1 to 22.1)    | -1.1 (-18.1 to 15.4)   |
|                  |                                          | DALYs                 | 78.6 (16.8 to 175.9)      | 80.6 (18.7 to 174.2)      | 76.3 (14.6 to 175.7)      | 77.7 (15.8 to 170.3)      | 81.9 (19.5 to 174.9)    | 73.6 (13.6 to 164.5)      | -1.1 (-15.8 to 15.5)    | 1.6 (-13.4 to 22.5)    | -3.5 (-22.2 to 14.3)   |
|                  |                                          | YLLs                  | 12 (2.2 to 29.3)          | 14.6 (3 to 35.4)          | 9.3 (1.6 to 23.8)         | 14 (2.7 to 33.6)          | 17 (3.5 to 39.8)        | 11 (1.9 to 27.6)          | 16.6 (7.3 to 29.1)      | 16.6 (7.3 to 30)       | 18.3 (7.6 to 33)       |
|                  | Secondhand smoke                         | Deaths                | 8 (5.1 to 11.1)           | 8.1 (5.1 to 11.3)         | 7.9 (5.1 to 11)           | 5.9 (3.8 to 8)            | 6.2 (4.1 to 8.4)        | 5.6 (3.6 to 7.7)          | -26.5 (-36.4 to -12.8)  | -23.5 (-34 to -6.6)    | -29.2 (-41.8 to -16.7) |
|                  |                                          | DALYs                 | 153.7 (97.3 to 216.4)     | 152.4 (94.8 to 216.7)     | 154.4 (95.8 to 218.7)     | 100.9 (62 to 140.7)       | 102.5 (64.2 to 142.5)   | 99.1 (59.7 to 141.9)      | -34.4 (-43.8 to -23.6)  | -32.8 (-42.2 to -20.5) | -35.8 (-46.8 to -24.2) |
|                  |                                          | YLLs                  | 4.6 (3.3 to 5.9)          | 5.3 (3.9 to 6.9)          | 3.8 (2.8 to 5)            | 3 (2.2 to 3.8)            | 3.5 (2.6 to 4.4)        | 2.5 (1.8 to 3.2)          | -35.7 (-43.9 to -24.5)  | -35.4 (-43.9 to -22.1) | -35.5 (-45.6 to -24.3) |
| Smoking          | Deaths                                   | 111.9 (82.2 to 142.9) | 137.2 (100.8 to 175.5)    | 87.4 (62.2 to 113.3)      | 71.9 (53.5 to 91.9)       | 88 (64.9 to 113)          | 57 (41.2 to 74.5)       | -35.7 (-43.7 to -24.8)    | -35.9 (-44.9 to -23.8)  | -34.8 (-44.5 to -23.2) |                        |
|                  | DALYs                                    | 104.5 (76.1 to 134.5) | 126.5 (92.8 to 162.5)     | 83.1 (58.8 to 108.3)      | 65.3 (48.3 to 83.3)       | 78.5 (57.2 to 101.4)      | 52.9 (38.1 to 69.1)     | -37.5 (-46 to -26.2)      | -37.9 (-47.2 to -25.1)  | -36.3 (-46.2 to -24.3) |                        |
|                  | YLLs                                     | 7.4 (4.8 to 10.3)     | 10.7 (6.9 to 14.8)        | 4.3 (2.8 to 6)            | 6.7 (4.3 to 9.2)          | 9.5 (6.1 to 13)           | 4 (2.6 to 5.6)          | -10.4 (-13.1 to -7.7)     | -11.2 (-14.3 to -8.1)   | -6.3 (-10.7 to -1.6)   |                        |
| All risk factors | Deaths                                   | 14 (12.2 to 16.9)     | 5.2 (4.2 to 6.3)          | 23 (19.8 to 28.6)         | 9 (7.8 to 10.3)           | 3.1 (2.6 to 3.7)          | 14.7 (12.6 to 17)       | -35.8 (-45.8 to -23.9)    | -39.5 (-50.4 to -26.5)  | -36.1 (-46.6 to -23.7) |                        |
|                  | DALYs                                    | 377.9 (329.6 to 455)  | 151.6 (125.2 to 181.7)    | 599.2 (514.8 to 729.6)    | 246 (214.2 to 280.1)      | 91.3 (76.5 to 107.4)      | 393.2 (336.6 to 452.6)  | -34.9 (-44.3 to -23.8)    | -39.8 (-49.1 to -29.1)  | -34.4 (-44.8 to -22.4) |                        |
|                  | YLLs                                     | 340.2 (293.7 to 414)  | 129.6 (106.2 to 157.2)    | 546.4 (464.7 to 673.5)    | 212.6 (182.7 to 246.2)    | 74.1 (61.9 to 88)         | 344.6 (291.7 to 402.6)  | -37.5 (-47.3 to -25.3)    | -42.9 (-52.9 to -30.9)  | -36.9 (-47.6 to -23.9) |                        |
| Afghanistan      | All risk factors                         | Deaths                | 37.6 (27.4 to 47.7)       | 22 (15.4 to 28.4)         | 52.8 (38.5 to 67.9)       | 33.4 (24.1 to 42.3)       | 17.2 (12.3 to 22.5)     | 48.6 (34.9 to 62.2)       | -11.3 (-15.1 to -7.5)   | -21.6 (-29.7 to -13)   | -7.9 (-11.4 to -4.2)   |
|                  |                                          | DALYs                 | 171.7 (117.7 to 222.3)    | 193.1 (122.4 to 254.5)    | 150.8 (103.6 to 201.9)    | 141.8 (97.3 to 183.1)     | 163.1 (104.7 to 217.4)  | 119.7 (84.3 to 158.7)     | -17.4 (-35.5 to 0.5)    | -15.5 (-36.1 to 7.2)   | -20.6 (-38.5 to -0.2)  |
|                  |                                          | YLLs                  | 3918.2 (2798.8 to 5039.1) | 4546.8 (3139.6 to 5924.1) | 3258.5 (2322.1 to 4396.6) | 3136.6 (2253.2 to 4043.7) | 3687.1 (2565.8 to 4876) | 2567.2 (1870.1 to 3339.9) | -19.9 (-38.2 to -0.9)   | -18.9 (-39 to 4.4)     | -21.2 (-39.2 to 1)     |
|                  |                                          | YLDs                  | 3711.5 (2596.8 to 4842.1) | 4293.9 (2877.2 to 5644.1) | 3097.7 (2156.2 to 4225.7) | 2919.3 (2036.9 to 3811.3) | 3426.5 (2283 to 4642)   | 2395.1 (1694.6 to 3170.7) | -21.3 (-40.8 to -1.1)   | -20.2 (-40.8 to 4.6)   | -22.7 (-41.8 to 0.6)   |
|                  | Alcohol use                              | Deaths                | 206.7 (151.6 to 261.7)    | 252.9 (184.3 to 318.3)    | 160.9 (117.3 to 206.3)    | 217.3 (159.6 to 274.4)    | 260.6 (191.5 to 330.3)  | 172 (123.9 to 218.2)      | 5.2 (-0.7 to 11.2)      | 3 (-3.9 to 10.8)       | 6.9 (-1.6 to 15.2)     |
|                  |                                          | DALYs                 | 0 (0 to 0)                | 0 (0 to 0)                | 0 (0 to 0)                | 0 (-0.1 to 0.1)           | -0.1 (-0.1 to 0)        | 0.1 (-0.1 to 0.3)         | -                       | -                      | -                      |
|                  |                                          | YLLs                  | 0 (-0.1 to 0.1)           | 0 (-0.1 to 0)             | 0 (-0.2 to 0.2)           | 0.9 (-2.1 to 4.5)         | -1 (-2.7 to 0.7)        | 2.8 (-2.4 to 10)          | -                       | -                      | -                      |
|                  |                                          | YLDs                  | 0 (-0.1 to 0.1)           | 0 (-0.1 to 0)             | 0 (-0.1 to 0.2)           | 0.9 (-1.8 to 4.3)         | -0.8 (-2.4 to 0.8)      | 2.8 (-2.1 to 9.6)         | -                       | -                      | -                      |
|                  | Ambient particulate matter pollution     | Deaths                | 0 (0 to 0)                | 0 (0 to 0)                | 0 (0 to 0)                | -0.1 (-0.3 to 0.2)        | -0.1 (-0.3 to 0)        | 0 (-0.4 to 0.5)           | -                       | -                      | -                      |
|                  |                                          | DALYs                 | 6.8 (1.6 to 18.4)         | 6.4 (1.4 to 17.7)         | 7.2 (1.7 to 19.3)         | 14.4 (6.3 to 28)          | 14.6 (6 to 29.1)        | 14.2 (6 to 27.2)          | 110.7 (13.9 to 416.7)   | 128.2 (23.7 to 471.1)  | 98.7 (8.6 to 382.1)    |
|                  |                                          | YLLs                  | 164.7 (37.7 to 440.3)     | 161 (36.8 to 439.7)       | 165.4 (38.8 to 449.9)     | 350.1 (150.6 to 677.2)    | 363.8 (151.4 to 718.3)  | 337.9 (140.9 to 642.9)    | 112.6 (15.3 to 436.2)   | 126 (20.2 to 471.6)    | 104.2 (11.7 to 402.7)  |
|                  |                                          | YLDs                  | 155.9 (35.4 to 418.7)     | 151.9 (34.1 to 412)       | 157 (37.2 to 433.3)       | 325.1 (137.9 to 631.8)    | 337.3 (138.7 to 667.2)  | 314.4 (129.2 to 606.4)    | 108.5 (12.2 to 425.3)   | 122.1 (17.7 to 466.3)  | 100.2 (8.3 to 396.8)   |
|                  | Diet high in red meat                    | Deaths                | 8.8 (2.1 to 23.9)         | 9.1 (2.1 to 25.3)         | 8.4 (2 to 22.7)           | 25 (10.4 to 46.2)         | 26.5 (11 to 49.8)       | 23.5 (9.6 to 41.9)        | 184.8 (61 to 574.2)     | 191.7 (62.6 to 590.2)  | 179.8 (57.5 to 576.2)  |
|                  |                                          | DALYs                 | 10.9 (4.5 to 17.4)        | 12.4 (4.9 to 20.1)        | 9.3 (3.8 to 15.3)         | 5.8 (2.1 to 9.8)          | 6.8 (2.5 to 11.6)       | 4.8 (1.7 to 8)            | -47 (-66.6 to -23.8)    | -45.5 (-66.5 to -19.2) | -48.7 (-67.3 to -25.7) |
|                  |                                          | YLLs                  | 317.5 (129.6 to 500.2)    | 375.4 (147.9 to 606.1)    | 251.8 (104.2 to 416.1)    | 163.1 (59.8 to 276.1)     | 196.5 (70.9 to 337.2)   | 129.5 (46.4 to 222)       | -48.6 (-68.2 to -24.9)  | -47.6 (-68.2 to -20.7) | -48.6 (-67.5 to -25.2) |
|                  |                                          | YLDs                  | 299.9 (120 to 478.8)      | 354 (135.4 to 582.7)      | 238.4 (96.2 to 399.7)     | 150.9 (54.2 to 255.8)     | 181.7 (65.9 to 319.9)   | 120.1 (42.6 to 207.8)     | -49.7 (-68.8 to -25)    | -48.7 (-69.4 to -21)   | -49.6 (-68.1 to -25.3) |
|                  | Diet high in sodium                      | Deaths                | 17.6 (7.7 to 27)          | 21.4 (9.5 to 33)          | 13.4 (5.8 to 20.6)        | 12.2 (4.2 to 20)          | 14.9 (5 to 24.4)        | 9.5 (3.2 to 15.6)         | -30.6 (-52.6 to -16.2)  | -30.5 (-53.8 to -14.6) | -29.3 (-53.4 to -14.1) |
|                  |                                          | DALYs                 | 3.5 (0.5 to 14.8)         | 2.8 (0.5 to 11.9)         | 4 (0.3 to 17.6)           | 2.6 (0.4 to 10.8)         | 2.2 (0.4 to 9.4)        | 3.1 (0.3 to 12.6)         | -24.4 (-54 to 53.5)     | -21.5 (-60.1 to 80.4)  | -24.1 (-56.7 to 60.1)  |
|                  |                                          | YLLs                  | 87 (10.3 to 372)          | 73.3 (12.2 to 320.6)      | 99.3 (6.9 to 428.1)       | 65.6 (8 to 274.6)         | 56.3 (9.5 to 240.3)     | 75.9 (5.6 to 311.7)       | -24.6 (-55.7 to 55)     | -23.2 (-62.5 to 88.1)  | -23.5 (-55.4 to 56.7)  |

| Location                                 | Risk factor | Measure           | 1990                      |                           |                           | 2019                      |                           |                          | % Change (1990 to 2019) |                         |                        |
|------------------------------------------|-------------|-------------------|---------------------------|---------------------------|---------------------------|---------------------------|---------------------------|--------------------------|-------------------------|-------------------------|------------------------|
|                                          |             |                   | Both                      | Female                    | Male                      | Both                      | Female                    | Male                     | Both                    | Female                  | Male                   |
| Diet low in fiber                        | Deaths      | YLLs              | 82.5 (9.6 to 353.2)       | 69.3 (11.4 to 305.2)      | 94.4 (6.5 to 411)         | 61 (7.3 to 256.3)         | 52.3 (8.7 to 223.5)       | 70.7 (5.2 to 293.3)      | -26 (-56.8 to 53.8)     | -24.6 (-63.1 to 84.8)   | -25.1 (-56.4 to 54.8)  |
|                                          |             | YLDs              | 4.5 (0.5 to 18.4)         | 4 (0.7 to 17.4)           | 4.9 (0.3 to 20)           | 4.6 (0.6 to 18)           | 4 (0.7 to 17.2)           | 5.2 (0.4 to 20.3)        | 2.2 (-38.4 to 94.1)     | 0.2 (-53.4 to 135.1)    | 5.3 (-32.4 to 100.6)   |
|                                          |             | DALYs             | 200.9 (38.6 to 396.3)     | 236.6 (45.3 to 474.1)     | 160.1 (32.2 to 331.4)     | 236.5 (59 to 429)         | 284.5 (67.9 to 507.4)     | 188.4 (46.5 to 348)      | 17.7 (-13.6 to 76)      | 20.3 (-15.8 to 85.3)    | 17.7 (-14.8 to 74.8)   |
|                                          |             | YLLs              | 189.6 (35.9 to 378.8)     | 222.8 (42.1 to 450.8)     | 151.5 (30.5 to 320.5)     | 218.7 (53.4 to 403.7)     | 262.7 (61.6 to 474.4)     | 174.6 (42.9 to 325.8)    | 15.3 (-16.6 to 75.3)    | 17.9 (-19.1 to 83.9)    | 15.2 (-17.8 to 74.1)   |
| Diet low in fruits                       | Deaths      | YLDs              | 11.3 (2.2 to 21.5)        | 13.7 (2.5 to 26)          | 8.7 (1.7 to 16.5)         | 17.9 (4.5 to 31.4)        | 21.8 (5.3 to 38.2)        | 13.9 (3.6 to 24.4)       | 57.9 (31.2 to 122.1)    | 58.8 (31 to 129.6)      | 60 (31.9 to 124.6)     |
|                                          |             | DALYs             | 442.2 (240.2 to 734)      | 525.6 (277.3 to 879)      | 348.7 (183.7 to 586.8)    | 306.1 (156.6 to 499.8)    | 370.3 (189.6 to 609.3)    | 241.4 (118.2 to 408.4)   | -30.8 (-49.8 to -4.2)   | -29.5 (-50.2 to 0.7)    | -30.8 (-50.2 to -3.5)  |
|                                          |             | YLLs              | 420.8 (223.5 to 700.1)    | 499.3 (258.6 to 848.9)    | 332.6 (169.8 to 567.7)    | 285.4 (146.4 to 470)      | 344.9 (173.6 to 574.5)    | 225.5 (111.7 to 389.1)   | -32.2 (-51.8 to -4.8)   | -30.9 (-51.7 to 0.3)    | -32.2 (-51.6 to -4.3)  |
|                                          |             | YLDs              | 21.4 (10.4 to 35.6)       | 26.3 (12.9 to 43.4)       | 16.1 (7.6 to 27.2)        | 20.7 (9.1 to 34.9)        | 25.4 (11.2 to 42.6)       | 15.9 (7.1 to 27.3)       | -3.3 (-19.5 to 9.3)     | -3.5 (-20.1 to 10)      | -1.1 (-17.2 to 12.2)   |
| Diet low in vegetables                   | Deaths      | YLDs              | 13.7 (5.8 to 22.9)        | 15.4 (6.2 to 26.7)        | 11.8 (5.1 to 20)          | 9.6 (4.2 to 15.5)         | 11.1 (4.9 to 18.1)        | 8 (3.5 to 13.1)          | -29.9 (-48.8 to -4)     | -27.7 (-48 to 1.5)      | -32.5 (-50.7 to -9.1)  |
|                                          |             | DALYs             | 369.8 (153.1 to 621.9)    | 434.8 (180 to 748.7)      | 296.9 (125.7 to 500.6)    | 257.1 (113.1 to 415.5)    | 308.1 (134.9 to 505.6)    | 205.6 (91.1 to 337.9)    | -30.5 (-50 to -3.2)     | -29.1 (-49.8 to 1.6)    | -30.7 (-50.1 to -4.5)  |
|                                          |             | YLLs              | 352.8 (139.7 to 603.3)    | 414 (166.1 to 717.6)      | 283.9 (117.9 to 480.1)    | 240.5 (104.8 to 393.9)    | 287.9 (127.9 to 474.1)    | 192.7 (85.3 to 319)      | -31.8 (-51.7 to -3.9)   | -30.5 (-51.5 to 0.9)    | -32.1 (-51.7 to -5)    |
|                                          |             | YLDs              | 17 (7.5 to 27.4)          | 20.8 (9.2 to 33.4)        | 13 (5.6 to 20.8)          | 16.6 (7 to 27.5)          | 20.2 (8.5 to 33.8)        | 12.9 (5.5 to 21.2)       | -2.4 (-18.1 to 11.2)    | -2.9 (-19.1 to 12)      | -0.1 (-14.6 to 13.7)   |
| Diet low in whole grains                 | Deaths      | YLDs              | 7 (4 to 10.9)             | 7.7 (4.3 to 11.8)         | 6.4 (3.4 to 10.5)         | 8.7 (4.7 to 12.7)         | 9.9 (5.2 to 14.8)         | 7.5 (4.1 to 11.4)        | 24.5 (-3.7 to 56.8)     | 29.1 (-1.9 to 64.3)     | 17.9 (-10.9 to 53.4)   |
|                                          |             | DALYs             | 143.7 (78.3 to 225.6)     | 162 (84.9 to 260)         | 125.1 (65.2 to 208.1)     | 186.8 (96.5 to 282.6)     | 217.6 (110 to 325.6)      | 155.3 (80.2 to 245.9)    | 30 (-0.4 to 63.2)       | 34.3 (1.8 to 71.6)      | 24.1 (-6.5 to 63.5)    |
|                                          |             | YLLs              | 126.8 (68.9 to 204)       | 141.6 (74.1 to 232.9)     | 111.5 (55.7 to 190.3)     | 166.8 (86.3 to 252.5)     | 193.6 (95.3 to 297.8)     | 139.3 (71.2 to 225.7)    | 31.5 (-2.8 to 70.4)     | 36.7 (0.2 to 80.4)      | 24.9 (-8.8 to 71.1)    |
|                                          |             | YLDs              | 17 (8.9 to 24.6)          | 20.3 (10.7 to 29.6)       | 13.6 (7.1 to 20)          | 20.1 (10.2 to 29.4)       | 24 (12.1 to 35.5)         | 16 (8.1 to 23.3)         | 18.3 (10.2 to 25.7)     | 17.8 (7.4 to 26.8)      | 17.5 (6.6 to 29.2)     |
| High body-mass index                     | Deaths      | YLDs              | 29.5 (13.7 to 49.4)       | 41 (20 to 66)             | 17.9 (6.2 to 34.7)        | 33.3 (18.7 to 51.1)       | 43.2 (24.4 to 66.7)       | 22.7 (11.9 to 37.4)      | 12.9 (-19.6 to 69.6)    | 5.4 (-27.3 to 55)       | 26.4 (-13.3 to 133.7)  |
|                                          |             | DALYs             | 963.6 (461.5 to 1583.3)   | 1357.2 (698.8 to 2135.6)  | 547.1 (193.7 to 1030.4)   | 1033 (612.1 to 1572.6)    | 1373.2 (825.9 to 2071)    | 681.5 (359.5 to 1095.6)  | 7.2 (-22.8 to 59.5)     | 1.2 (-29 to 50.6)       | 24.6 (-15.7 to 130)    |
|                                          |             | YLLs              | 914.8 (432.1 to 1520.3)   | 1286.9 (649.1 to 2055.1)  | 520.6 (181.8 to 997.3)    | 961 (560.2 to 1480.6)     | 1276.2 (753.5 to 1964)    | 635.3 (330.6 to 1037)    | 5 (-26 to 57.7)         | -0.8 (-31.3 to 50.5)    | 22 (-18.9 to 129.2)    |
|                                          |             | YLDs              | 48.8 (24.3 to 80.1)       | 70.3 (37.6 to 110.1)      | 26.4 (9.4 to 48.7)        | 72 (43.3 to 107.2)        | 97 (60.8 to 141.5)        | 46.2 (24.5 to 72.4)      | 47.7 (24.4 to 98.4)     | 37.9 (15.7 to 83.9)     | 74.8 (34.8 to 192.8)   |
| High fasting plasma glucose              | Deaths      | YLDs              | 38 (21 to 63.8)           | 49.1 (24.8 to 84.5)       | 28.1 (16.3 to 47.1)       | 53.8 (30.1 to 91.9)       | 61.6 (33.4 to 107)        | 45.6 (25.8 to 77.9)      | 41.7 (0.9 to 100.2)     | 25.5 (-15.5 to 89.8)    | 62.2 (7.5 to 133)      |
|                                          |             | DALYs             | 782.6 (468.4 to 1224.3)   | 1025.2 (548.6 to 1672)    | 562.2 (350.7 to 901.6)    | 1146.7 (695.3 to 1821.3)  | 1362.5 (812.6 to 2203.4)  | 922.3 (557.2 to 1457.8)  | 46.5 (1.9 to 107)       | 32.9 (-11.7 to 108.4)   | 64.1 (11.9 to 130.2)   |
|                                          |             | YLLs              | 740.3 (435 to 1166.1)     | 966.5 (503.3 to 1590.4)   | 534.6 (325.2 to 869.4)    | 1067 (635.2 to 1721.2)    | 1265.4 (737.8 to 2059.6)  | 861 (514.4 to 1345.7)    | 44.1 (-1.4 to 107.8)    | 30.9 (-14.8 to 107.3)   | 61 (8.5 to 127.6)      |
|                                          |             | YLDs              | 42.3 (23.2 to 70.5)       | 58.7 (30.8 to 103.9)      | 27.6 (16 to 45.4)         | 79.7 (44.4 to 131)        | 97.1 (54.7 to 158.1)      | 61.3 (33.8 to 100.1)     | 88.4 (51.6 to 143.5)    | 65.5 (26 to 134.6)      | 122.4 (66.2 to 192.5)  |
| High LDL cholesterol                     | Deaths      | YLDs              | 14.7 (5.3 to 31.9)        | 16.9 (6.1 to 36.8)        | 12.6 (4.3 to 27.4)        | 19.8 (7.8 to 40.4)        | 23.6 (9.4 to 48.9)        | 15.9 (6.1 to 33.8)       | 34.3 (4.5 to 75.6)      | 39.5 (4.9 to 88.9)      | 25.9 (-6.1 to 71.2)    |
|                                          |             | DALYs             | 326.5 (175.2 to 568.9)    | 385.5 (208.9 to 673.1)    | 265.7 (131.5 to 488.7)    | 461.2 (265.1 to 763.5)    | 563.9 (320 to 946.8)      | 357.2 (191.1 to 624.4)   | 41.3 (8.1 to 83.8)      | 46.3 (9.7 to 94.8)      | 34.4 (-0.5 to 80)      |
|                                          |             | YLLs              | 285 (145.9 to 512.2)      | 334.2 (168.2 to 601)      | 234.1 (110.3 to 447)      | 408.9 (222.6 to 702.3)    | 498.8 (276.3 to 855.1)    | 317.8 (163.4 to 576.2)   | 43.5 (6 to 94.8)        | 49.3 (7.7 to 108.7)     | 35.8 (-3.3 to 90.1)    |
|                                          |             | YLDs              | 41.5 (25.3 to 67)         | 51.3 (31.4 to 82.7)       | 31.6 (18.6 to 51)         | 52.4 (32.6 to 83.5)       | 65.1 (40.8 to 102.2)      | 39.3 (24 to 62.7)        | 26 (17 to 36.3)         | 26.9 (15.6 to 40.3)     | 24.3 (11.2 to 41.3)    |
| High systolic blood pressure             | Deaths      | YLDs              | 94.3 (60.8 to 128.4)      | 110.1 (66.4 to 154.1)     | 79.2 (50.4 to 112.4)      | 76.2 (49.3 to 106.5)      | 90.2 (53.7 to 131.1)      | 61.5 (39.7 to 88.3)      | -19.2 (-40.8 to 5.3)    | -18 (-42.1 to 14.5)     | -22.4 (-43 to 4.6)     |
|                                          |             | DALYs             | 2233.2 (1518.3 to 3020.1) | 2655.2 (1697.2 to 3638.7) | 1805.3 (1180.2 to 2508.3) | 1759.3 (1176.5 to 2416.6) | 2100.8 (1340 to 2985)     | 1399.8 (941.2 to 1974.6) | -21.2 (-42.2 to 3.7)    | -20.9 (-44.6 to 11)     | -22.5 (-42.6 to 6)     |
|                                          |             | YLLs              | 2118.2 (1410.3 to 2902.6) | 2511.5 (1576.1 to 3485.4) | 1718 (1097.6 to 2426.8)   | 1638.8 (1060.4 to 2277.9) | 1955.1 (1182.9 to 2842.4) | 1306.4 (844 to 1849.3)   | -22.6 (-44 to 3.4)      | -22.2 (-45.9 to 10.8)   | -24 (-44.6 to 4.6)     |
|                                          |             | YLDs              | 115.1 (80.2 to 152.3)     | 143.7 (96.9 to 191.5)     | 87.3 (59.6 to 117.1)      | 120.4 (83.1 to 159.3)     | 145.7 (99.3 to 195.1)     | 93.4 (62.2 to 124.8)     | 4.7 (-10.5 to 23.4)     | 1.4 (-18.8 to 31.1)     | 7 (-11.2 to 28.3)      |
| High temperature                         | Deaths      | YLDs              | 1.3 (-0.5 to 3.8)         | 1.4 (-0.5 to 4.2)         | 1.2 (-0.4 to 3.4)         | 1 (-0.2 to 2.8)           | 1.2 (-0.2 to 3.1)         | 0.9 (-0.1 to 2.4)        | -20.9 (-197.5 to 113)   | -18 (-200.4 to 124.4)   | -25 (-188.3 to 101.1)  |
|                                          |             | YLLs              | 27.5 (-10 to 79.3)        | 31.4 (-10.9 to 90.9)      | 23.4 (-8.3 to 68.9)       | 20.5 (-3.1 to 54.7)       | 24 (-3.6 to 63.5)         | 17 (-2.7 to 45.5)        | -25.3 (-193.2 to 101.4) | -23.5 (-194.2 to 108.8) | -27.4 (-185.7 to 91.4) |
| Household air pollution from solid fuels | Deaths      | YLDs              | 82.7 (51.8 to 121.8)      | 95.8 (58.9 to 141.2)      | 69.8 (43.3 to 105.6)      | 45.9 (29.8 to 65.2)       | 55.8 (34.5 to 80.5)       | 35.6 (22.4 to 52.6)      | -44.5 (-58.1 to -28.4)  | -41.8 (-56.3 to -23.9)  | -49 (-61.6 to -32.8)   |
|                                          |             | DALYs             | 2004.6 (1330.6 to 2810.7) | 2390.6 (1584.9 to 3426)   | 1596.8 (1009.4 to 2326.5) | 1120.1 (755.8 to 1574.4)  | 1388.7 (912.8 to 1987.5)  | 841.8 (537.8 to 1220.7)  | -44.1 (-57.9 to -26.8)  | -41.9 (-57.4 to -22.5)  | -47.3 (-60.9 to -29.5) |
|                                          |             | YLLs              | 1896.9 (1240.2 to 2685.5) | 2256.2 (1459.7 to 3258.3) | 1516 (941.8 to 2228.1)    | 1039.6 (689.2 to 1480.4)  | 1287.3 (821.6 to 1876.4)  | 783 (494.5 to 1160.9)    | -45.2 (-59.5 to -27.3)  | -42.9 (-58.8 to -22.4)  | -48.4 (-62.3 to -29.6) |
|                                          |             | YLDs              | 107.7 (72.3 to 147.2)     | 134.4 (90.6 to 183.3)     | 80.8 (53.7 to 113)        | 80.5 (53.1 to 110)        | 101.3 (68.1 to 138.2)     | 58.8 (37.2 to 83)        | -25.2 (-35.2 to -16.9)  | -24.6 (-34.1 to -16.1)  | -27.3 (-40.4 to -16.7) |
| Kidney dysfunction                       | Deaths      | YLDs              | 13.8 (8.9 to 19.6)        | 16.7 (9.8 to 24.4)        | 11.1 (7.4 to 16.4)        | 15.5 (9.7 to 22.1)        | 18.4 (11.2 to 27.3)       | 12.4 (8.1 to 17.5)       | 12 (-15.3 to 42.2)      | 10 (-17 to 45.1)        | 11.6 (-16.7 to 44.3)   |
|                                          |             | DALYs             | 321.4 (221.5 to 440.4)    | 400.1 (260.3 to 565.9)    | 242.5 (170.3 to 345.1)    | 345.8 (241.5 to 470.4)    | 423.1 (281.3 to 592)      | 263.9 (186 to 357.5)     | 7.6 (-17.3 to 35.5)     | 5.7 (-20.4 to 37.2)     | 8.8 (-17 to 40.6)      |
|                                          |             | YLLs              | 301.9 (203.6 to 422.4)    | 374.4 (237.7 to 535.4)    | 228.9 (158.1 to 330.2)    | 319.3 (217.2 to 441.6)    | 389.9 (249.7 to 552.9)    | 244.6 (168.9 to 334.7)   | 5.8 (-20.4 to 35)       | 4.1 (-23 to 38.3)       | 6.8 (-20.2 to 40.2)    |
|                                          |             | YLDs              | 19.6 (13.5 to 25.7)       | 25.7 (17.7 to 34)         | 13.6 (9.3 to 18.2)        | 26.5 (18.3 to 35.2)       | 33.2 (22.8 to 44.2)       | 19.3 (13.1 to 25.8)      | 35.5 (25.3 to 45.5)     | 29.1 (18.5 to 40.2)     | 42.3 (28 to 57.2)      |
| Lead exposure                            | Deaths      | YLDs              | 21.1 (13.2 to 30.2)       | 20 (11.3 to 29.7)         | 22 (13.6 to 32)           | 19.3 (12.1 to 28)         | 19.2 (11.3 to 28.3)       | 19.5 (12.5 to 28.1)      | -8.5 (-30.2 to 15.9)    | -3.8 (-28.4 to 25.8)    | -11.4 (-32.4 to 13.8)  |
|                                          |             | DALYs             | 523.3 (330.4 to 753.1)    | 514.5 (308.7 to 753)      | 524.5 (329.2 to 762.8)    | 434.9 (284.8 to 613.6)    | 441.8 (269.8 to 643.5)    | 429.8 (285.4 to 615.7)   | -16.9 (-37.4 to 7)      | -14.1 (-36.6 to 13.8)   | -18.1 (-37.7 to 7.2)   |
|                                          |             | YLLs              | 496.7 (307.9 to 722.7)    | 486.8 (283.4 to 721.4)    | 499.1 (307.8 to 735.8)    | 405.6 (258.5 to 580.3)    | 411.5 (244.1 to 612.2)    | 401.6 (259.8 to 583)     | -18.3 (-39.5 to 6.7)    | -15.5 (-38.8 to 14.1)   | -19.5 (-39.6 to 7)     |
|                                          |             | YLDs              | 26.6 (17.2 to 37.3)       | 27.7 (17.2 to 39.2)       | 25.4 (16.7 to 35.3)       | 29.2 (18.8 to 41.1)       | 30.3 (19.2 to 43.2)       | 28.2 (18.4 to 39)        | 9.8 (0.9 to 19.6)       | 9.4 (-1.8 to 23.3)      | 10.9 (-0.9 to 22.7)    |
| Low physical activity                    | Deaths      | 6.4 (1.3 to 14.2) | 7 (1.6 to 15.9)           | 5.9 (1.1 to 13.1)         | 8.1 (1.7 to 18)           | 9.3 (2.1 to 20.6)         | 6.9 (1.3 to 15.4)         | 27.2 (-0.5 to 60.4)      | 33.5 (0.7 to 75.7)      | 18.5 (-11.2 to 59.7)    |                        |

| Location                 | Risk factor                          | Measure               | 1990                      |                         |                           | 2019                      |                           |                           | % Change (1990 to 2019)   |                        |                           |
|--------------------------|--------------------------------------|-----------------------|---------------------------|-------------------------|---------------------------|---------------------------|---------------------------|---------------------------|---------------------------|------------------------|---------------------------|
|                          |                                      |                       | Both                      | Female                  | Male                      | Both                      | Female                    | Male                      | Both                      | Female                 | Male                      |
|                          | activity                             | DALYs                 | 98.6 (19.2 to 231.3)      | 110.3 (22.2 to 259.4)   | 87.5 (15.6 to 210.3)      | 129.9 (25.1 to 306.9)     | 151.6 (31.4 to 365.9)     | 107.5 (19.2 to 260.3)     | 31.8 (2.6 to 64.1)        | 37.4 (2.7 to 76.3)     | 22.9 (-8 to 59.7)         |
|                          |                                      | YLLs                  | 89 (17.6 to 208.8)        | 98.7 (20.2 to 236.7)    | 79.8 (14.5 to 191.6)      | 118.3 (23 to 281.7)       | 137.6 (27.6 to 328.8)     | 98.4 (18.1 to 238.6)      | 32.8 (1 to 69.1)          | 39.3 (1.7 to 82.1)     | 23.2 (-9.5 to 64.9)       |
|                          |                                      | YLDs                  | 9.5 (1.6 to 24.4)         | 11.6 (2.2 to 29.2)      | 7.6 (1.2 to 20)           | 11.6 (2 to 30)            | 14 (2.6 to 36.1)          | 9.1 (1.4 to 24.2)         | 21.8 (9.2 to 34.6)        | 21.2 (4.7 to 38.9)     | 19.1 (1.6 to 35.8)        |
|                          | Low temperature                      | Deaths                | 18.8 (11.2 to 27.6)       | 20.8 (11.5 to 31)       | 16.8 (10 to 25)           | 15.4 (9.1 to 22.6)        | 17.6 (9.9 to 26.2)        | 13.1 (7.9 to 19.9)        | -18 (-36.1 to 1.3)        | -15.1 (-35.1 to 9)     | -22.2 (-40.4 to -2.1)     |
|                          |                                      | YLLs                  | 400.5 (241.2 to 573.3)    | 457.8 (262.7 to 682.1)  | 339.6 (203.7 to 508)      | 310 (185.3 to 451)        | 362.6 (209.9 to 532.1)    | 255.7 (153.8 to 388.8)    | -22.6 (-41.2 to -1.5)     | -20.8 (-41.3 to 3.5)   | -24.7 (-42.9 to -2.7)     |
|                          | Secondhand smoke                     | Deaths                | 7 (4.4 to 9.9)            | 8.5 (5.1 to 12.2)       | 5.4 (3.2 to 7.9)          | 6 (3.9 to 8.5)            | 7.5 (4.5 to 10.7)         | 4.4 (2.8 to 6.5)          | -14.5 (-34.5 to 7.6)      | -12.5 (-34.7 to 14.4)  | -17.4 (-38 to 10.6)       |
|                          |                                      | DALYs                 | 189.3 (119.8 to 269.4)    | 244.7 (152.5 to 349.2)  | 128 (77.7 to 193.2)       | 154.5 (101 to 218.8)      | 204.4 (130.4 to 296.2)    | 104.2 (65.8 to 154.9)     | -18.4 (-39.4 to 6.2)      | -16.4 (-39.1 to 13.9)  | -18.6 (-39.4 to 11)       |
|                          |                                      | YLLs                  | 183.3 (115.8 to 260.8)    | 236.5 (145.7 to 339.9)  | 124.2 (74.6 to 189.6)     | 147.8 (94.9 to 212.7)     | 195.4 (122 to 288.1)      | 100 (62.7 to 149.1)       | -19.4 (-40.5 to 6)        | -17.4 (-41 to 13.7)    | -19.5 (-40.9 to 10.6)     |
|                          | Smoking                              | YLDs                  | 6 (3.8 to 8.5)            | 8.1 (5.1 to 11.5)       | 3.8 (2.4 to 5.4)          | 6.7 (4.3 to 9.4)          | 9.1 (5.8 to 12.7)         | 4.3 (2.7 to 6)            | 10.5 (0.2 to 21.5)        | 11.4 (-0.8 to 24.9)    | 12.1 (-4.2 to 31.2)       |
|                          |                                      | Deaths                | 7.9 (5.3 to 10.8)         | 3.6 (2.2 to 5.4)        | 11.8 (7.8 to 16.5)        | 9.3 (6.4 to 12.9)         | 4.7 (2.8 to 7.1)          | 14.4 (9.8 to 20.1)        | 17.7 (-13.7 to 59.4)      | 28 (-17.5 to 105.1)    | 22 (-9.1 to 62.9)         |
|                          |                                      | DALYs                 | 213.2 (146.3 to 285.7)    | 109.8 (68.2 to 163.6)   | 310.7 (209.4 to 436.8)    | 269.9 (190.2 to 369.4)    | 145.8 (90.5 to 217.3)     | 403.2 (277.5 to 559.6)    | 26.6 (-8.6 to 76.4)       | 32.8 (-15.8 to 113.5)  | 29.8 (-5.9 to 78.4)       |
|                          |                                      | YLLs                  | 202 (135.8 to 273.7)      | 103.5 (62.6 to 156)     | 294.7 (195.6 to 414.9)    | 250.1 (170.4 to 345.1)    | 134.7 (80.9 to 204)       | 374.1 (251.9 to 528.9)    | 23.8 (-11.7 to 74.4)      | 30.1 (-18.9 to 112.2)  | 27 (-9.4 to 76.6)         |
| YLDs                     |                                      | 11.2 (7.8 to 14.7)    | 6.3 (4.1 to 8.8)          | 16 (11.2 to 21.2)       | 19.7 (14.1 to 26.1)       | 11 (7.1 to 16.2)          | 29.1 (20.5 to 37.4)       | 76 (48.6 to 108.8)        | 76.1 (26.6 to 149.6)      | 81.9 (55.6 to 111.2)   |                           |
| Algeria                  | All risk factors                     | Deaths                | 146.2 (120.5 to 176)      | 161.1 (127.8 to 194.7)  | 137.2 (108.7 to 170.1)    | 84.8 (68.6 to 104.3)      | 99.9 (77.4 to 121.8)      | 75.4 (57.9 to 96)         | -42 (-54 to -28)          | -38 (-51.9 to -22.4)   | -45 (-58.2 to -28.5)      |
|                          |                                      | DALYs                 | 2625.7 (2165.1 to 3168.6) | 2832 (2274.6 to 3421.8) | 2470.6 (1956.2 to 3102.5) | 1503.9 (1242.7 to 1802.3) | 1681.6 (1342.6 to 2013.7) | 1370.4 (1076.5 to 1712.2) | -42.7 (-54.3 to -29.1)    | -40.6 (-52.8 to -27.1) | -44.5 (-57 to -28.6)      |
|                          |                                      | YLLs                  | 2395.6 (1951 to 2939.2)   | 2560.1 (2019.5 to 3144) | 2281.6 (1759.4 to 2908.8) | 1295.2 (1031 to 1598)     | 1435.2 (1099.6 to 1758.4) | 1197.7 (912.6 to 1536.8)  | -45.9 (-58.4 to -31.6)    | -43.9 (-57 to -29.1)   | -47.5 (-60.7 to -30.3)    |
|                          | Alcohol use                          | YLDs                  | 230.2 (168.1 to 292.8)    | 271.9 (196.7 to 344.9)  | 189 (137.1 to 242)        | 208.7 (151.6 to 265.2)    | 246.4 (179.8 to 315.5)    | 172.7 (124.9 to 219.6)    | -9.3 (-14.6 to -3.7)      | -9.4 (-16 to -2.5)     | -8.6 (-14.9 to -1.3)      |
|                          |                                      | Deaths                | 0.2 (-0.2 to 0.5)         | -0.2 (-0.4 to 0)        | 0.5 (-0.1 to 1.2)         | 0.2 (-0.1 to 0.4)         | -0.2 (-0.5 to 0)          | 0.5 (0.1 to 0.9)          | -5.8 (-398.5 to 832.9)    | 11.9 (-153.8 to 229.4) | -4.2 (-294.5 to 442.5)    |
|                          |                                      | DALYs                 | 7.1 (-0.4 to 16.3)        | -2.3 (-6.6 to 2.5)      | 16.5 (2.3 to 33.6)        | 6.7 (0.4 to 13.2)         | -2.6 (-6.6 to 1.1)        | 15.6 (4.9 to 27.9)        | -5.7 (-163.2 to 363.6)    | 17.4 (-502.8 to 443.5) | -5.6 (-54.8 to 190.5)     |
|                          |                                      | YLLs                  | 7 (-0.1 to 15.7)          | -1.7 (-5.7 to 2.7)      | 15.7 (2.7 to 32.2)        | 6.1 (0.5 to 11.9)         | -2 (-5.5 to 1.1)          | 13.8 (4.4 to 24.8)        | -12.4 (-100.6 to 263.3)   | 18.9 (-480.3 to 669.9) | -12 (-57.5 to 154.1)      |
|                          |                                      | YLDs                  | 0.1 (-0.5 to 0.8)         | -0.5 (-1.1 to -0.1)     | 0.8 (-0.4 to 2.1)         | 0.6 (-0.2 to 1.5)         | -0.6 (-1.3 to 0)          | 1.7 (0.3 to 3.4)          | 411.6 (-2121.2 to 1439.2) | 12.8 (-71.3 to 77.2)   | 121.1 (-1355.3 to 1437.6) |
|                          |                                      | Deaths                | 27.7 (17.1 to 39.5)       | 28.8 (17.2 to 42.5)     | 27.3 (16.7 to 39.5)       | 19.5 (12.8 to 26.7)       | 22.3 (14.8 to 30.7)       | 17.5 (11.3 to 24.8)       | -29.8 (-46.9 to -4.9)     | -22.5 (-43.4 to 9)     | -35.7 (-53.4 to -11.2)    |
|                          | Ambient particulate matter pollution | DALYs                 | 578.5 (362.6 to 834.6)    | 597.2 (360.8 to 876.7)  | 566 (356.4 to 822.8)      | 409 (278 to 550.1)        | 451.9 (306 to 607.5)      | 373.5 (249.9 to 522.2)    | -29.3 (-46 to -3.6)       | -24.3 (-44.2 to 6)     | -34 (-50.7 to -9.9)       |
|                          |                                      | YLLs                  | 523.4 (326.1 to 751.4)    | 534.2 (320.7 to 775.1)  | 518.7 (327.5 to 762.4)    | 346.3 (230 to 474.4)      | 377.6 (250.8 to 518.9)    | 322.1 (209 to 460.5)      | -33.8 (-50.5 to -9.2)     | -29.3 (-49.4 to 1.4)   | -37.9 (-54.9 to -13.2)    |
|                          |                                      | YLDs                  | 55.1 (32.6 to 82.1)       | 63 (37.1 to 94.7)       | 47.3 (28.3 to 69.5)       | 62.7 (41 to 86.4)         | 74.3 (49.5 to 103.1)      | 51.4 (33.6 to 70.4)       | 13.7 (-1.3 to 44.3)       | 18.1 (-0.6 to 55.5)    | 8.7 (-5.2 to 36.8)        |
|                          | Diet high in red meat                | Deaths                | 4 (1.4 to 6.7)            | 4.3 (1.6 to 7.2)        | 3.8 (1.2 to 6.4)          | 2.5 (0.8 to 4.2)          | 2.9 (0.9 to 4.9)          | 2.3 (0.8 to 3.8)          | -36.8 (-59.1 to -6.5)     | -32.9 (-57.1 to 5.8)   | -39.7 (-61.8 to -8.7)     |
|                          |                                      | DALYs                 | 93.1 (31.8 to 155.6)      | 100.9 (36.1 to 166.9)   | 86.3 (29.4 to 146.4)      | 59 (20.7 to 94.5)         | 65.5 (23.4 to 108.1)      | 53.5 (18.2 to 87.4)       | -36.7 (-58.3 to -4.1)     | -35.2 (-57.9 to 3)     | -38 (-59.8 to -8.3)       |
|                          |                                      | YLLs                  | 83.8 (27.7 to 141.3)      | 89.8 (30.4 to 148.8)    | 78.7 (26.2 to 135.8)      | 49.4 (17.6 to 81.2)       | 54.1 (19.2 to 91.4)       | 45.7 (15.9 to 75.6)       | -41.1 (-61.3 to -7.3)     | -39.8 (-61.2 to 1.2)   | -42 (-62.4 to -11.2)      |
|                          |                                      | YLDs                  | 9.4 (2.8 to 16)           | 11.1 (3.3 to 18.9)      | 7.6 (2.3 to 12.9)         | 9.6 (2.6 to 16.2)         | 11.4 (3.1 to 19.3)        | 7.8 (2.1 to 13.3)         | 2.3 (-17.5 to 22.5)       | 2.6 (-18.8 to 26.9)    | 2.7 (-17.4 to 23)         |
|                          |                                      | Deaths                | 2.7 (0.5 to 11.3)         | 2 (0.5 to 8)            | 3.3 (0.3 to 13.9)         | 1.4 (0.3 to 5.5)          | 1.1 (0.3 to 4.3)          | 1.7 (0.2 to 6.8)          | -46.7 (-66.9 to 2.5)      | -44.6 (-70.2 to 16.1)  | -47.9 (-72.7 to 19)       |
|                          |                                      | DALYs                 | 56.6 (8 to 234.2)         | 42.4 (8.7 to 171.4)     | 70.9 (5.8 to 295.3)       | 30.4 (4.5 to 118.2)       | 22.9 (5.2 to 93.3)        | 37.7 (3.2 to 150.6)       | -46.2 (-66.4 to -5.1)     | -46 (-70.9 to 16.4)    | -46.8 (-69 to 6.8)        |
|                          |                                      | YLLs                  | 51.5 (7.3 to 213.4)       | 38 (8 to 156.8)         | 65 (5.3 to 271.3)         | 26 (3.8 to 100.8)         | 19.2 (4.4 to 79.9)        | 32.6 (2.7 to 130.7)       | -49.5 (-69.3 to -8.7)     | -49.5 (-72.9 to 10.1)  | -49.9 (-71.4 to 3)        |
|                          |                                      | YLDs                  | 5.1 (0.6 to 21.1)         | 4.4 (0.8 to 18.5)       | 5.8 (0.4 to 23.2)         | 4.5 (0.6 to 17.6)         | 3.7 (0.7 to 15.3)         | 5.2 (0.4 to 20)           | -13.1 (-46.3 to 60)       | -15.9 (-58.6 to 108.1) | -11.6 (-42.6 to 77.3)     |
|                          |                                      | Deaths                | 6 (1.3 to 11.2)           | 6.6 (1.4 to 12.7)       | 5.6 (1.2 to 10.7)         | 1.4 (0.4 to 3)            | 1.6 (0.4 to 3.6)          | 1.3 (0.3 to 2.7)          | -76.7 (-84.4 to -65.8)    | -75.3 (-85.9 to -60.6) | -77.5 (-86.3 to -64.5)    |
|                          | Diet low in fiber                    | DALYs                 | 123.3 (24.7 to 234.1)     | 134.9 (27.2 to 258)     | 113.6 (22.7 to 218.8)     | 26 (6 to 57)              | 28.7 (6.6 to 63.2)        | 23.9 (5.3 to 52.3)        | -78.9 (-85.5 to -69.6)    | -78.7 (-86.6 to -68)   | -78.9 (-86.4 to -69.1)    |
|                          |                                      | YLLs                  | 111.4 (22.3 to 212.6)     | 120.8 (24.1 to 233.1)   | 103.9 (20.7 to 203.8)     | 22.1 (5.2 to 48.4)        | 24.3 (5.6 to 54.1)        | 20.7 (4.7 to 45.3)        | -80.1 (-86.5 to -70.7)    | -79.9 (-87.6 to -69.6) | -80.1 (-87.5 to -70)      |
|                          |                                      | YLDs                  | 11.9 (2.3 to 23.3)        | 14.2 (2.7 to 27.8)      | 9.7 (1.9 to 18.8)         | 3.8 (0.8 to 8.5)          | 4.5 (1 to 10.4)           | 3.3 (0.7 to 7.2)          | -67.7 (-77 to -57)        | -68.5 (-79.2 to -57.1) | -66.4 (-76.4 to -54.3)    |
|                          | Diet low in fruits                   | Deaths                | 9.4 (4.5 to 15.6)         | 10.3 (5 to 17.2)        | 8.7 (4.1 to 15)           | 3.2 (1.3 to 5.7)          | 3.9 (1.5 to 7)            | 2.8 (1.1 to 5)            | -65.4 (-79.4 to -49.4)    | -62 (-78.3 to -42.6)   | -68 (-81.3 to -51.2)      |
|                          |                                      | DALYs                 | 208.8 (105.6 to 346.3)    | 229.1 (114.7 to 382.6)  | 191 (94.2 to 322.9)       | 68.4 (29.3 to 117.9)      | 78.9 (31.5 to 137.1)      | 59.6 (25.1 to 106.2)      | -67.3 (-80.6 to -50.8)    | -65.6 (-80.2 to -47.9) | -68.8 (-81.8 to -52.3)    |
|                          |                                      | YLLs                  | 190.1 (96.4 to 323.7)     | 206.7 (104 to 352.3)    | 175.9 (87.5 to 302.7)     | 58.3 (24.9 to 99.9)       | 66.6 (28.2 to 115.5)      | 51.7 (22 to 92.1)         | -69.3 (-81.8 to -52.7)    | -67.8 (-81.4 to -49.7) | -70.6 (-83.2 to -54.1)    |
|                          |                                      | YLDs                  | 18.7 (7.7 to 33.6)        | 22.4 (9.3 to 40.1)      | 15.1 (6.1 to 27.1)        | 10.1 (3.3 to 18.8)        | 12.3 (4 to 22.9)          | 7.9 (2.6 to 14.9)         | -46.2 (-68.5 to -29.7)    | -45.1 (-67.6 to -27.5) | -47.4 (-68.9 to -28.4)    |
|                          |                                      | Deaths                | 5.8 (1.9 to 9.8)          | 6.3 (2 to 10.6)         | 5.6 (1.9 to 9.8)          | 1.8 (0.6 to 3.4)          | 2.1 (0.7 to 3.9)          | 1.7 (0.5 to 3.2)          | -68.4 (-84.5 to -48)      | -66.5 (-84.3 to -43.2) | -69.7 (-85.3 to -49.5)    |
|                          |                                      | DALYs                 | 122.9 (36 to 209.5)       | 131.3 (41.1 to 226.7)   | 115.9 (36.6 to 204.4)     | 36.1 (10.5 to 67.8)       | 39.1 (10.9 to 73.8)       | 33.9 (9.9 to 66.2)        | -70.6 (-86.5 to -47.4)    | -70.2 (-86.7 to -44.2) | -70.8 (-86.4 to -48.2)    |
| Diet low in vegetables   | YLLs                                 | 112.4 (31.5 to 193.5) | 119 (36.7 to 209.1)       | 107.3 (32.8 to 192.1)   | 30.8 (9.2 to 59.4)        | 33 (9.4 to 63.1)          | 29.4 (8.7 to 58.9)        | -72.6 (-87.1 to -49.9)    | -72.3 (-87.3 to -47.1)    | -72.6 (-87.2 to -50.8) |                           |
|                          | YLDs                                 | 10.5 (3.5 to 18.3)    | 12.3 (4.1 to 21.6)        | 8.7 (3 to 15.1)         | 5.3 (1.1 to 10.2)         | 6.1 (1.3 to 11.9)         | 4.5 (1 to 8.5)            | -49.5 (-75.9 to -22.2)    | -50.3 (-77.3 to -22.3)    | -48 (-74.7 to -20.2)   |                           |
|                          | Deaths                               | 7.9 (4.4 to 10.8)     | 9 (5 to 12.5)             | 7.2 (3.8 to 10.2)       | 5.6 (2.8 to 7.8)          | 6.7 (3.3 to 9.4)          | 4.9 (2.4 to 7.1)          | -29.3 (-45.5 to -11)      | -26.3 (-44.5 to -5.7)     | -31.8 (-49.8 to -7.4)  |                           |
| Diet low in whole grains | DALYs                                | 134.4 (69.4 to 184.6) | 148.9 (77.1 to 209.9)     | 123.9 (63 to 177.2)     | 101.6 (49 to 145.7)       | 115.3 (54.9 to 162.8)     | 91.1 (42.7 to 133)        | -24.4 (-40.6 to -6.4)     | -22.6 (-40.3 to -3.4)     | -26.5 (-45.1 to -2.8)  |                           |
|                          | YLLs                                 | 115 (60 to 160.7)     | 125.6 (66.4 to 178.8)     | 108.4 (54.8 to 157.7)   | 83.3 (40.4 to 119.4)      | 93.5 (44.8 to 135.6)      | 76.3 (35.3 to 113.3)      | -27.5 (-44.9 to -6.6)     | -25.6 (-45.3 to -3.5)     | -29.6 (-49.6 to -2.5)  |                           |
|                          | YLDs                                 | 19.4 (9.1 to 29.1)    | 23.3 (11.3 to 35)         | 15.5 (7 to 23.4)        | 18.3 (8.2 to 27.5)        | 21.8 (10 to 32.8)         | 14.8 (6.7 to 22.6)        | -5.9 (-13.2 to 1.4)       | -6.4 (-16.3 to 4.2)       | -4.5 (-13.7 to 5.5)    |                           |

| Location              | Risk factor                              | Measure                | 1990                      |                           |                           | 2019                   |                         |                         | % Change (1990 to 2019) |                          |                        |
|-----------------------|------------------------------------------|------------------------|---------------------------|---------------------------|---------------------------|------------------------|-------------------------|-------------------------|-------------------------|--------------------------|------------------------|
|                       |                                          |                        | Both                      | Female                    | Male                      | Both                   | Female                  | Male                    | Both                    | Female                   | Male                   |
|                       | High body-mass index                     | Deaths                 | 24.9 (14.3 to 38.4)       | 31.3 (18.5 to 47.8)       | 18.9 (8.7 to 32.7)        | 18.5 (11 to 28)        | 22.1 (13.2 to 33.4)     | 15.6 (8.8 to 24.8)      | -25.7 (-45.1 to 2.9)    | -29.5 (-48.5 to -3.3)    | -17.3 (-42.2 to 31.2)  |
|                       |                                          | DALYs                  | 758.4 (465.7 to 1113.7)   | 964.7 (632.6 to 1362.5)   | 550.8 (274.8 to 908)      | 541.6 (362.1 to 750.9) | 633.7 (431.4 to 862.4)  | 455.5 (281.3 to 682)    | -28.6 (-45.9 to -4.3)   | -34.3 (-49.4 to -12.6)   | -17.3 (-41.4 to 27.4)  |
|                       |                                          | YLLs                   | 679.6 (411.9 to 1012.8)   | 856.5 (540.9 to 1228.3)   | 502.4 (249.5 to 839.9)    | 449.9 (289.4 to 640.4) | 517.1 (337.8 to 725)    | 388 (231.3 to 590.6)    | -33.8 (-51.4 to -8.4)   | -39.6 (-55.9 to -16.9)   | -22.8 (-47.2 to 21.4)  |
|                       |                                          | YLDs                   | 78.8 (46.9 to 117.3)      | 108.2 (67.9 to 155.9)     | 48.4 (23.4 to 80.4)       | 91.8 (59.1 to 130.2)   | 116.7 (77.7 to 163.4)   | 67.5 (40.4 to 99.8)     | 16.5 (2.8 to 38.8)      | 7.8 (-3.9 to 25.6)       | 39.4 (11.9 to 102.1)   |
|                       | High fasting plasma glucose              | Deaths                 | 30.5 (16.9 to 57.9)       | 34.9 (18 to 71.5)         | 27.6 (15.6 to 50.1)       | 31.5 (16.3 to 62.5)    | 36 (18 to 72.7)         | 28.7 (14.8 to 58.9)     | 3.2 (-29.5 to 43.2)     | 3.2 (-32.4 to 53.6)      | 4.1 (-34.5 to 54)      |
|                       |                                          | DALYs                  | 506.9 (318.1 to 852.8)    | 561.5 (337.7 to 994.9)    | 465.9 (288.4 to 772)      | 536.7 (315.2 to 918.5) | 586.5 (334.2 to 987)    | 501.3 (284.2 to 892)    | 5.9 (-25.1 to 46.9)     | 4.4 (-28.4 to 50.3)      | 7.6 (-28.2 to 57.7)    |
|                       |                                          | YLLs                   | 463.4 (286 to 779.7)      | 509.1 (299.6 to 913.7)    | 431.1 (264.2 to 713.5)    | 463.4 (262.6 to 805.2) | 501.1 (278.4 to 853.3)  | 439.5 (245.2 to 790.8)  | 0 (-30.3 to 40.7)       | -1.6 (-33.9 to 44.9)     | 1.9 (-34.6 to 53.4)    |
|                       |                                          | YLDs                   | 43.5 (24.7 to 72.5)       | 52.4 (29.6 to 89.6)       | 34.8 (19.4 to 58.8)       | 73.3 (40.4 to 121.1)   | 85.4 (46.4 to 142.6)    | 61.9 (33.6 to 104.2)    | 68.6 (33 to 116.4)      | 63 (20.2 to 117.2)       | 77.6 (35 to 132.8)     |
|                       | High LDL cholesterol                     | Deaths                 | 18.6 (5.5 to 43.7)        | 22.2 (6.2 to 54)          | 16.2 (5 to 37.5)          | 14.4 (4.5 to 33.7)     | 18.2 (5.1 to 41.8)      | 12 (3.8 to 27.4)        | -22.2 (-37.6 to -0.2)   | -18.1 (-36.4 to 6)       | -26 (-44.2 to 1)       |
|                       |                                          | DALYs                  | 327.1 (160.9 to 620)      | 377.5 (181.5 to 737.2)    | 287.9 (141 to 540.7)      | 272 (137.7 to 493.8)   | 323.3 (160.5 to 594.1)  | 231.1 (116.9 to 421.7)  | -16.8 (-32.6 to 5.3)    | -14.4 (-32.2 to 10.1)    | -19.7 (-38.4 to 7.6)   |
|                       |                                          | YLLs                   | 277.2 (125.8 to 543.1)    | 315.8 (137.5 to 664.1)    | 249.7 (114.7 to 485.3)    | 221 (105.2 to 416.5)   | 260.1 (118.2 to 499.9)  | 191.9 (89.4 to 368.7)   | -20.3 (-38.1 to 6.2)    | -17.7 (-38 to 12.1)      | -23.1 (-44.1 to 9.1)   |
|                       |                                          | YLDs                   | 49.9 (29.3 to 81.8)       | 61.7 (36.3 to 100.6)      | 38.2 (22.1 to 63.2)       | 51 (29.7 to 83.6)      | 63.2 (37.3 to 103.7)    | 39.2 (22.9 to 65)       | 2.2 (-4.8 to 9.8)       | 2.4 (-6.4 to 13.7)       | 2.6 (-7.2 to 13.7)     |
|                       | High systolic blood pressure             | Deaths                 | 90 (66.9 to 118.7)        | 103.1 (73.7 to 136.8)     | 81.1 (57.3 to 111.2)      | 48.1 (34.3 to 65)      | 58.4 (38.8 to 80)       | 41.4 (28.6 to 57.4)     | -46.5 (-58.9 to -30.8)  | -43.4 (-59.3 to -23.2)   | -49 (-63.7 to -31.2)   |
|                       |                                          | DALYs                  | 1667.8 (1296.2 to 2105.6) | 1864.4 (1392.7 to 2370.2) | 1505.9 (1115.3 to 1997.4) | 872 (662.5 to 1114.9)  | 995.9 (716.9 to 1288.7) | 775.7 (563.6 to 1026.9) | -47.7 (-59.3 to -34.5)  | -46.6 (-59.3 to -30.7)   | -48.5 (-61.8 to -31.6) |
|                       |                                          | YLLs                   | 1520.5 (1160.1 to 1940.1) | 1684.6 (1246.3 to 2173.3) | 1390.9 (1004 to 1866.5)   | 750.7 (558.1 to 975.3) | 850.6 (601.1 to 1114.8) | 677.3 (484.7 to 918.8)  | -50.6 (-62.6 to -36.3)  | -49.5 (-62.5 to -32.7)   | -51.3 (-65.1 to -33.8) |
|                       |                                          | YLDs                   | 147.4 (103.6 to 194.8)    | 179.8 (124.4 to 239.4)    | 115 (82.2 to 153.4)       | 121.3 (84 to 161.9)    | 145.3 (100.2 to 196.8)  | 98.4 (67.2 to 132.5)    | -17.7 (-28.5 to -6.1)   | -19.2 (-33 to -2.8)      | -14.4 (-27.3 to 0.3)   |
|                       | High temperature                         | Deaths                 | 5.5 (1.2 to 10.8)         | 6.1 (1.3 to 11.6)         | 5.2 (1.1 to 10.1)         | 3.3 (1.1 to 5.9)       | 3.9 (1.4 to 7.1)        | 2.9 (1 to 5.3)          | -40.9 (-57.8 to -7)     | -36.3 (-56.7 to 0.5)     | -44.3 (-61.8 to -17.6) |
|                       |                                          | YLLs                   | 89.3 (19.3 to 176.6)      | 95.6 (20.3 to 185.2)      | 85 (18.8 to 168.1)        | 48.8 (17.6 to 89)      | 54.6 (19.8 to 99.6)     | 44.7 (16.1 to 81.8)     | -45.4 (-62.6 to -13.9)  | -42.9 (-60.7 to -8.3)    | -47.3 (-64.8 to -20.8) |
|                       | Household air pollution from solid fuels | Deaths                 | 7.7 (3.4 to 14.5)         | 9.7 (4.3 to 18)           | 6.1 (2.4 to 12.3)         | 0.1 (0 to 0.1)         | 0.1 (0 to 0.2)          | 0 (0 to 0.1)            | -99.2 (-99.7 to -98.1)  | -99.2 (-99.6 to -97.9)   | -99.3 (-99.7 to -98.3) |
|                       |                                          | DALYs                  | 162.5 (70.9 to 299.1)     | 201.8 (90.7 to 364.8)     | 126.5 (51 to 256.1)       | 1.3 (0.5 to 2.7)       | 1.7 (0.7 to 3.4)        | 0.9 (0.3 to 2.1)        | -99.2 (-99.7 to -98.1)  | -99.2 (-99.7 to -98)     | -99.3 (-99.7 to -98.2) |
|                       |                                          | YLLs                   | 146.6 (63.4 to 270.8)     | 180.6 (79.9 to 327.3)     | 116 (46.3 to 234.6)       | 1.1 (0.4 to 2.2)       | 1.4 (0.5 to 2.9)        | 0.8 (0.3 to 1.8)        | -99.3 (-99.7 to -98.2)  | -99.2 (-99.7 to -98.1)   | -99.3 (-99.7 to -98.3) |
|                       |                                          | YLDs                   | 15.9 (7.2 to 28.9)        | 21.2 (9.6 to 37.3)        | 10.5 (4.4 to 21.1)        | 0.2 (0.1 to 0.4)       | 0.3 (0.1 to 0.6)        | 0.1 (0 to 0.3)          | -98.7 (-99.5 to -97.1)  | -98.7 (-99.5 to -97)     | -98.8 (-99.5 to -97.2) |
|                       | Kidney dysfunction                       | Deaths                 | 12.6 (7.7 to 17.4)        | 14.9 (8.6 to 21.4)        | 10.9 (7 to 15.1)          | 9.5 (4.8 to 14.4)      | 11.1 (4.8 to 17.2)      | 8.3 (4.5 to 12.8)       | -24.6 (-47.3 to -0.8)   | -25.8 (-52.4 to -3.1)    | -23.2 (-47 to 5)       |
|                       |                                          | DALYs                  | 237.3 (169.9 to 309.6)    | 277 (190 to 371.7)        | 201.6 (146.4 to 269.5)    | 188.2 (124.7 to 256.3) | 216.5 (136.6 to 296.8)  | 163 (107.3 to 226.6)    | -20.7 (-38.1 to 1.3)    | -21.8 (-39.7 to -0.8)    | -19.2 (-39.4 to 7.1)   |
|                       |                                          | YLLs                   | 213.2 (150 to 282.6)      | 245.9 (162.7 to 336.6)    | 184.5 (128.9 to 252.8)    | 158.6 (100.5 to 220.3) | 179.6 (108.4 to 252.4)  | 140.6 (89.7 to 201.7)   | -25.6 (-44.1 to -1.9)   | -27 (-46.2 to -4)        | -23.8 (-45 to 4.3)     |
|                       |                                          | YLDs                   | 24.2 (16.5 to 32.8)       | 31.1 (21.2 to 42.3)       | 17.1 (11.6 to 23.3)       | 29.6 (20.1 to 40.5)    | 37 (25 to 50.5)         | 22.4 (15.1 to 31.1)     | 22.4 (12.5 to 32.4)     | 18.9 (8 to 30.9)         | 31 (17.8 to 45.4)      |
|                       | Lead exposure                            | Deaths                 | 6.4 (3.2 to 10.7)         | 5.9 (2.5 to 10.2)         | 6.9 (3.7 to 11.3)         | 3.4 (1.6 to 5.6)       | 3.4 (1.4 to 5.9)        | 3.5 (1.8 to 5.8)        | -46.9 (-59.6 to -32.6)  | -42.7 (-57.5 to -24.8)   | -49.4 (-62.3 to -32.9) |
|                       |                                          | DALYs                  | 122.4 (60.7 to 200.5)     | 110.2 (43.1 to 187.9)     | 135.6 (73.5 to 216.7)     | 55.5 (24.6 to 93.2)    | 51.8 (18.2 to 93.6)     | 60 (29.1 to 96.1)       | -54.7 (-65.8 to -42.4)  | -53 (-66.2 to -40.4)     | -55.7 (-67.8 to -42.7) |
|                       |                                          | YLLs                   | 111.8 (55.2 to 183.6)     | 99.5 (38.5 to 173)        | 125.1 (66.7 to 203.2)     | 48.5 (21.2 to 82.3)    | 44.8 (15.7 to 81.5)     | 52.9 (25.3 to 85.3)     | -56.6 (-67.9 to -43.7)  | -54.9 (-68.1 to -40.9)   | -57.7 (-69.9 to -43.9) |
|                       |                                          | YLDs                   | 10.6 (4.8 to 17.9)        | 10.7 (4.1 to 19)          | 10.6 (5.2 to 16.9)        | 7.1 (2.6 to 12.8)      | 7 (2 to 13.2)           | 7.2 (3.2 to 12.3)       | -33.7 (-47.4 to -24.8)  | -35.3 (-53.6 to -24.1)   | -32.1 (-45.1 to -22.4) |
| Low physical activity | Deaths                                   | 10.7 (2.3 to 22)       | 12.4 (3.2 to 25.6)        | 9.6 (1.8 to 20.3)         | 8.2 (1.9 to 16.2)         | 10.3 (2.6 to 20.2)     | 7 (1.4 to 14.3)         | -22.9 (-38.5 to -0.6)   | -16.8 (-36.4 to 12.8)   | -27.6 (-45.6 to 1.3)     |                        |
|                       | DALYs                                    | 138.2 (28.3 to 301.9)  | 156.8 (37.9 to 340)       | 125.4 (22 to 286.4)       | 110.3 (23.5 to 231.6)     | 131.7 (31.8 to 274.7)  | 95.2 (18.1 to 207.4)    | -20.2 (-35.4 to 0.4)    | -16.1 (-33.5 to 10.8)   | -24.1 (-42.4 to 3.8)     |                        |
|                       | YLLs                                     | 124.5 (25.9 to 266.7)  | 140.2 (34.2 to 302.4)     | 114.4 (20.1 to 262.2)     | 95.5 (20.9 to 198.1)      | 113.7 (27.7 to 232.2)  | 83.4 (16.1 to 178.9)    | -23.3 (-39.4 to -1.3)   | -18.9 (-37.6 to 9.6)    | -27.1 (-46.2 to 1.9)     |                        |
|                       | YLDs                                     | 13.8 (2.5 to 34.1)     | 16.7 (3.3 to 40.9)        | 11 (1.7 to 27.9)          | 14.8 (2.8 to 35.5)        | 18 (3.6 to 43)         | 11.8 (2 to 29)          | 7.4 (-3.1 to 25.8)      | 7.8 (-5.7 to 31.2)      | 6.9 (-6.7 to 30.1)       |                        |
| Low temperature       | Deaths                                   | 8.1 (1.6 to 14.7)      | 9 (1.8 to 16)             | 7.6 (1.5 to 14)           | 4.8 (0.8 to 8.8)          | 5.7 (1 to 10.5)        | 4.2 (0.8 to 7.7)        | -41 (-56.9 to -24.4)    | -36.5 (-54.4 to -17.1)  | -44.5 (-59.8 to -26.1)   |                        |
|                       | YLLs                                     | 130.8 (25.6 to 239.7)  | 140 (27.7 to 250.4)       | 124.5 (24.2 to 230.1)     | 71.2 (12.6 to 130.3)      | 79.7 (14 to 148.5)     | 65.3 (11.5 to 119.3)    | -45.5 (-60.5 to -28.8)  | -43.1 (-59.3 to -26.1)  | -47.5 (-62.6 to -29.3)   |                        |
| Secondhand smoke      | Deaths                                   | 7 (5 to 9.3)           | 9 (6.3 to 12)             | 5.3 (3.6 to 7.3)          | 3.9 (2.8 to 5.2)          | 5.2 (3.7 to 7)         | 2.9 (1.9 to 4)          | -44 (-56.7 to -28.8)    | -42.2 (-55.8 to -25.5)  | -45.6 (-60.2 to -26.9)   |                        |
|                       | DALYs                                    | 152.8 (109.9 to 202.7) | 199.5 (144 to 264.6)      | 108 (73.6 to 147.5)       | 82.3 (58.4 to 109.2)      | 108.5 (77.8 to 142.9)  | 58.2 (39 to 81.7)       | -46.1 (-58.5 to -31.3)  | -45.6 (-58.3 to -29.6)  | -46.1 (-60.7 to -27.5)   |                        |
|                       | YLLs                                     | 143.4 (102.1 to 191.7) | 186.1 (132.3 to 250.4)    | 102.6 (68.4 to 141.7)     | 74 (51.5 to 100.4)        | 96.8 (66.4 to 129.3)   | 53.4 (35.2 to 76.7)     | -48.4 (-61 to -32.9)    | -48 (-61.2 to -31.3)    | -48 (-62.5 to -28.6)     |                        |
|                       | YLDs                                     | 9.4 (6.1 to 12.9)      | 13.4 (8.7 to 18.4)        | 5.4 (3.5 to 7.5)          | 8.3 (5.4 to 11.5)         | 11.8 (7.7 to 16.5)     | 4.9 (3.1 to 6.8)        | -12.2 (-19.1 to -4.3)   | -12.2 (-20 to -3.2)     | -9.3 (-21.2 to 4.3)      |                        |
| Smoking               | Deaths                                   | 19.3 (15.3 to 24.2)    | 5.2 (3.5 to 7.3)          | 32.3 (24.9 to 41)         | 8.7 (6.6 to 10.9)         | 2.1 (1.5 to 2.9)       | 14.6 (10.9 to 18.8)     | -55.2 (-65.8 to -41.3)  | -59.3 (-72.6 to -37.1)  | -54.8 (-65.9 to -39.7)   |                        |
|                       | DALYs                                    | 419.7 (330.2 to 523.2) | 119.6 (82.8 to 166.5)     | 716.9 (550.6 to 911.1)    | 197.1 (156 to 245.9)      | 48.4 (34.7 to 64.9)    | 339.1 (263.4 to 429.8)  | -53 (-63.5 to -39.8)    | -59.5 (-72 to -38.8)    | -52.7 (-63.6 to -37.5)   |                        |
|                       | YLLs                                     | 382.5 (295 to 487.2)   | 106.2 (73.6 to 149.4)     | 655.3 (495.7 to 855.2)    | 168.5 (127.5 to 216)      | 40 (27.9 to 54.2)      | 291 (216.4 to 379.7)    | -55.9 (-66.8 to -41.5)  | -62.3 (-74.6 to -41.2)  | -55.6 (-67 to -39.9)     |                        |
|                       | YLDs                                     | 37.2 (27 to 47.9)      | 13.4 (8.8 to 19.1)        | 61.6 (44.9 to 79.3)       | 28.5 (20.4 to 36.3)       | 8.4 (5.5 to 12.3)      | 48.1 (34.2 to 61.7)     | -23.3 (-31 to -14.8)    | -37.2 (-54.2 to -11.7)  | -21.9 (-29.9 to -13)     |                        |
| Bahrain               | All risk factors                         | Deaths                 | 88 (76.6 to 103.5)        | 93.2 (80.4 to 108.1)      | 82.6 (70 to 104.7)        | 44.8 (36.4 to 56.8)    | 49.6 (39.1 to 61.8)     | 40.5 (32.3 to 57)       | -49.1 (-59.1 to -37.3)  | -46.8 (-59 to -32.2)     | -51 (-61.9 to -37.5)   |
|                       |                                          | DALYs                  | 1711.9 (1516.3 to 1952.6) | 1890 (1659.5 to 2170.1)   | 1561.2 (1349.3 to 1877.8) | 818.1 (689.8 to 989.9) | 931.6 (777.1 to 1115.8) | 733.3 (605.5 to 952.1)  | -52.2 (-61 to -41.9)    | -50.7 (-60.1 to -38.9)   | -53 (-62.3 to -41.9)   |
|                       |                                          | YLLs                   | 1506.4 (1313.9 to 1759.1) | 1629.7 (1406.6 to 1904.3) | 1402.5 (1194.1 to 1720.9) | 666.6 (544.8 to 843.8) | 739.4 (597.4 to 910.9)  | 609.6 (488.6 to 839.3)  | -55.7 (-65 to -44.4)    | -54.6 (-65 to -41.3)     | -56.5 (-66.4 to -44.6) |
|                       |                                          | YLDs                   | 205.6 (148.9 to 260.9)    | 260.2 (186.6 to 329.6)    | 158.7 (114.6 to 203.1)    | 151.4 (109.5 to 192.5) | 192.1 (138 to 243.8)    | 123.7 (90.7 to 156.9)   | -26.3 (-30.5 to -22)    | -26.2 (-31.8 to -20.5)   | -22 (-28 to -15.5)     |
|                       | Alcohol use                              | Deaths                 | 1.8 (1.2 to 2.5)          | 0.5 (0 to 1.1)            | 3.1 (2 to 4.3)            | 0.2 (0 to 0.4)         | -0.1 (-0.2 to 0.1)      | 0.4 (0.1 to 0.7)        | -90.6 (-100.3 to -80.6) | -114.5 (-257.4 to -89.5) | -87.9 (-96.2 to -78.6) |

| Location                             | Risk factor | Measure                  | 1990                     |                         |                        | 2019                   |                        |                        | % Change (1990 to 2019)  |                        |      |
|--------------------------------------|-------------|--------------------------|--------------------------|-------------------------|------------------------|------------------------|------------------------|------------------------|--------------------------|------------------------|------|
|                                      |             |                          | Both                     | Female                  | Male                   | Both                   | Female                 | Male                   | Both                     | Female                 | Male |
| Ambient particulate matter pollution | DALYs       | 50.2 (34.5 to 66.5)      | 16 (4.5 to 30.1)         | 77.9 (52.2 to 106.8)    | 6.7 (2.2 to 11.9)      | -0.8 (-3.4 to 2.5)     | 11.5 (4.9 to 19.6)     | -86.7 (-95 to -77.4)   | -104.8 (-155.4 to -89)   | -85.3 (-93.3 to -76.3) |      |
|                                      | YLLs        | 45.8 (31.4 to 61.1)      | 15 (4.6 to 27.8)         | 71.2 (47.8 to 98)       | 5.6 (2 to 9.9)         | -0.4 (-2.5 to 2.3)     | 9.5 (4 to 16.2)        | -87.8 (-95.2 to -79.1) | -102.4 (-140.3 to -89.1) | -86.6 (-93.9 to -78.1) |      |
|                                      | YLDs        | 4.3 (2.4 to 6.3)         | 1 (-0.3 to 2.7)          | 6.8 (3.8 to 10.1)       | 1.1 (0.2 to 2.2)       | -0.4 (-1.1 to 0.2)     | 2 (0.6 to 3.6)         | -75.3 (-95.3 to -59.3) | -140.6 (-674.6 to 475.4) | -71.1 (-87.6 to -57.2) |      |
|                                      | Deaths      | 28.5 (22.3 to 35.8)      | 29.8 (23.2 to 37)        | 27.3 (21.3 to 36)       | 14.6 (11.4 to 19.3)    | 16.1 (12.4 to 20.9)    | 13.2 (10.2 to 18.9)    | -48.8 (-60.1 to -33.9) | -45.9 (-59.2 to -28.3)   | -51.5 (-63.1 to -37.6) |      |
|                                      | DALYs       | 618.1 (493.5 to 755)     | 673.8 (529.5 to 831.2)   | 574.6 (457.6 to 725)    | 304.4 (241.6 to 382)   | 347.9 (278.6 to 436.5) | 274 (216.8 to 360.3)   | -50.8 (-60.9 to -37.8) | -48.4 (-59.6 to -33.4)   | -52.3 (-62.9 to -39.3) |      |
|                                      | YLLs        | 539.4 (426 to 664.5)     | 575.4 (447.4 to 716.1)   | 511.9 (401.8 to 653.9)  | 242.3 (188.2 to 317.7) | 268.4 (206.9 to 348.9) | 223 (172.1 to 307.7)   | -55.1 (-65.7 to -41.1) | -53.3 (-65.4 to -37.8)   | -56.4 (-67.3 to -42.6) |      |
| Diet high in red meat                | YLDs        | 78.7 (54.3 to 104.1)     | 98.4 (67.3 to 130.7)     | 62.7 (43.2 to 83.3)     | 62.2 (44.8 to 81.4)    | 79.5 (56.9 to 104.1)   | 51.1 (36.8 to 66.2)    | -21 (-29.2 to -9.5)    | -19.2 (-29.3 to -5.7)    | -18.6 (-27.7 to -6.4)  |      |
|                                      | Deaths      | 3.8 (1.6 to 5.8)         | 4 (1.7 to 6.3)           | 3.6 (1.5 to 5.6)        | 1.8 (0.7 to 2.8)       | 1.9 (0.8 to 3.1)       | 1.6 (0.6 to 2.6)       | -53.6 (-66.4 to -36.3) | -51.8 (-67.5 to -29.6)   | -55.1 (-69.1 to -33.6) |      |
|                                      | DALYs       | 91.5 (39.7 to 137.6)     | 101.4 (42.9 to 154.9)    | 84.1 (36.9 to 128.2)    | 42 (17.3 to 65.3)      | 47.6 (19.7 to 74.8)    | 38.4 (15.7 to 60.6)    | -54.1 (-65.9 to -38.7) | -53.1 (-66.7 to -33.6)   | -54.4 (-67.5 to -35.1) |      |
| Diet high in sodium                  | YLLs        | 78.9 (34.1 to 120.1)     | 85.4 (35.4 to 132.6)     | 74 (31.9 to 114.1)      | 32.2 (13.4 to 51.4)    | 35 (14.2 to 56.6)      | 30.2 (12.4 to 48.4)    | -59.1 (-70.4 to -43.5) | -59 (-72 to -38.9)       | -59.1 (-71.5 to -40.3) |      |
|                                      | YLDs        | 12.6 (4.7 to 20.4)       | 16 (6.1 to 25.9)         | 10.1 (3.6 to 16.6)      | 9.8 (3.7 to 15.6)      | 12.6 (4.6 to 20.6)     | 8.1 (3 to 12.9)        | -22.4 (-36 to -6.8)    | -21.4 (-40.4 to 0.2)     | -19.4 (-37.9 to 5.5)   |      |
|                                      | Deaths      | 1.6 (0.3 to 6.5)         | 1.2 (0.3 to 5.1)         | 2 (0.2 to 8.2)          | 0.8 (0.1 to 3.1)       | 0.6 (0.2 to 2.5)       | 0.9 (0.1 to 3.7)       | -52.6 (-71 to -16)     | -51.5 (-75.3 to -0.3)    | -54.3 (-75.7 to 8.5)   |      |
| Diet low in fiber                    | DALYs       | 36.6 (4.8 to 147.4)      | 28.3 (5.3 to 119)        | 43.7 (3.6 to 175.3)     | 17.1 (2.3 to 68.4)     | 13.2 (2.7 to 56.7)     | 19.9 (1.7 to 76.7)     | -53.3 (-72.3 to -19.7) | -53.5 (-77.7 to 1)       | -54.6 (-72.8 to -5.2)  |      |
|                                      | YLLs        | 32.2 (4.2 to 130)        | 24.3 (4.6 to 102.6)      | 39 (3.3 to 158)         | 13.7 (1.9 to 56)       | 10.3 (2.2 to 44.7)     | 16.2 (1.4 to 63.3)     | -57.5 (-75.3 to -24.8) | -57.8 (-79.9 to -6.7)    | -58.6 (-75.5 to -10.7) |      |
|                                      | YLDs        | 4.4 (0.5 to 17.9)        | 4 (0.7 to 16.7)          | 4.7 (0.3 to 18.6)       | 3.4 (0.4 to 13.5)      | 2.9 (0.5 to 12.5)      | 3.7 (0.3 to 14.1)      | -22.8 (-56.1 to 28.9)  | -27.9 (-64.7 to 58.5)    | -20.8 (-47 to 49)      |      |
| Diet low in fruits                   | Deaths      | 0.9 (0.3 to 2.1)         | 0.9 (0.3 to 2.3)         | 0.9 (0.3 to 2.1)        | 0.4 (0.1 to 0.8)       | 0.4 (0.1 to 0.9)       | 0.3 (0.1 to 0.8)       | -61.5 (-76.1 to -38.6) | -59.7 (-78.7 to -22)     | -63.3 (-80.4 to -29.7) |      |
|                                      | DALYs       | 18.9 (5.3 to 42.7)       | 20 (5.7 to 47.2)         | 18 (4.8 to 41.4)        | 6.9 (2.3 to 15.3)      | 7.5 (2.5 to 18.1)      | 6.4 (2.1 to 14.6)      | -63.5 (-76.4 to -43.7) | -62.6 (-78.3 to -34.6)   | -64.3 (-79.5 to -37.1) |      |
|                                      | YLLs        | 16.2 (4.6 to 37)         | 16.8 (4.9 to 40.6)       | 15.9 (4.3 to 36.4)      | 5.4 (1.9 to 12.2)      | 5.6 (1.9 to 13.4)      | 5.2 (1.7 to 12)        | -66.8 (-79.1 to -47.8) | -66.5 (-81.3 to -39)     | -67.3 (-81.8 to -41.4) |      |
| Diet low in vegetables               | YLDs        | 2.6 (0.7 to 6)           | 3.2 (0.8 to 7.7)         | 2.2 (0.5 to 5.1)        | 1.5 (0.4 to 3.4)       | 1.9 (0.5 to 4.6)       | 1.2 (0.4 to 2.9)       | -43.4 (-63.2 to -15.2) | -42.6 (-68.5 to -0.6)    | -42.1 (-66.9 to -0.2)  |      |
|                                      | Deaths      | 2.3 (1.1 to 3.8)         | 2.5 (1.1 to 4.4)         | 2.1 (0.9 to 3.7)        | 0.9 (0.4 to 1.6)       | 1.1 (0.5 to 1.9)       | 0.8 (0.3 to 1.6)       | -60.3 (-75.6 to -36.1) | -57.8 (-78.1 to -25.1)   | -62.5 (-80 to -27.9)   |      |
|                                      | DALYs       | 54.4 (27.8 to 89.1)      | 62.6 (29.5 to 108.4)     | 48.3 (22.6 to 82.8)     | 21.5 (10 to 36.1)      | 25.8 (11.7 to 45.2)    | 18.6 (8.4 to 33.1)     | -60.5 (-73.4 to -42)   | -58.7 (-75.4 to -32)     | -61.5 (-77 to -35.1)   |      |
| Diet low in whole grains             | YLLs        | 47.4 (24.3 to 77.1)      | 53.3 (25.5 to 91.7)      | 42.9 (19.6 to 74.4)     | 16.7 (8 to 28.5)       | 19.3 (8.9 to 33.9)     | 14.9 (6.9 to 26.4)     | -64.7 (-76.9 to -46.6) | -63.8 (-79.3 to -37.2)   | -65.3 (-79.7 to -40.3) |      |
|                                      | YLDs        | 7 (2.6 to 12.6)          | 9.3 (3.3 to 17.5)        | 5.4 (1.9 to 10.3)       | 4.7 (1.7 to 8.8)       | 6.5 (2.3 to 12.6)      | 3.7 (1.3 to 7.2)       | -32.6 (-51.2 to -10.8) | -30 (-55.6 to 7.5)       | -31.8 (-58.1 to 4.9)   |      |
|                                      | Deaths      | 1.1 (0.3 to 2.3)         | 1.1 (0.3 to 2.3)         | 1.1 (0.3 to 2.4)        | 0.4 (0.1 to 0.7)       | 0.4 (0.1 to 0.8)       | 0.4 (0.1 to 0.8)       | -67.1 (-80.2 to -48.3) | -66.3 (-82.4 to -41.1)   | -67.9 (-82.5 to -43.7) |      |
| High body-mass index                 | DALYs       | 22.2 (6.2 to 48.1)       | 23 (6.1 to 50.3)         | 21.7 (5.6 to 48.3)      | 6.6 (2.1 to 14.4)      | 6.8 (2.4 to 15.2)      | 6.4 (2 to 14.6)        | -70.2 (-81.3 to -53.2) | -70.2 (-83.4 to -47.5)   | -70.4 (-83 to -48.9)   |      |
|                                      | YLLs        | 19.4 (5.3 to 43.4)       | 19.6 (5.3 to 44.4)       | 19.4 (5 to 44.5)        | 5.3 (1.8 to 11.8)      | 5.4 (1.9 to 12)        | 5.3 (1.7 to 12.4)      | -72.5 (-83 to -55)     | -72.7 (-85.3 to -50.6)   | -72.6 (-84.6 to -51.9) |      |
|                                      | YLDs        | 2.8 (0.7 to 5.9)         | 3.4 (0.8 to 7.3)         | 2.3 (0.5 to 4.9)        | 1.3 (0.4 to 2.8)       | 1.5 (0.4 to 3.4)       | 1.1 (0.3 to 2.6)       | -54.3 (-69.9 to -32.3) | -55.8 (-75.2 to -28)     | -51.5 (-72.2 to -19.7) |      |
| High fasting plasma glucose          | Deaths      | 3.9 (1.7 to 5.4)         | 4.2 (1.9 to 5.9)         | 3.5 (1.5 to 4.9)        | 2 (0.8 to 2.9)         | 2.1 (0.8 to 3.2)       | 1.8 (0.7 to 2.8)       | -48.6 (-60.4 to -35.7) | -48.9 (-64.1 to -33.8)   | -47.3 (-60.9 to -31.2) |      |
|                                      | DALYs       | 74.3 (32.2 to 104.6)     | 84 (36.6 to 118.7)       | 65.2 (27.5 to 92.7)     | 37.7 (14 to 55.6)      | 42.2 (14.7 to 61.9)    | 34.2 (12.9 to 51.3)    | -49.3 (-60.7 to -39)   | -49.7 (-62.6 to -38.4)   | -47.6 (-59.7 to -34.9) |      |
|                                      | YLLs        | 59.4 (25.5 to 84)        | 65.1 (28.8 to 92.5)      | 53.7 (22.6 to 76.5)     | 27.2 (10.2 to 41)      | 29 (10.4 to 43.7)      | 25.5 (10.1 to 39.2)    | -54.2 (-65.6 to -42.1) | -55.5 (-68.3 to -41.8)   | -52.5 (-65.1 to -37.5) |      |
| High LDL cholesterol                 | YLDs        | 14.9 (6 to 22.6)         | 19 (7.5 to 29.3)         | 11.5 (4.7 to 17.8)      | 10.5 (3.5 to 16.3)     | 13.3 (4.3 to 20.7)     | 8.7 (3.1 to 13.9)      | -29.6 (-40.7 to -23.7) | -30 (-43.1 to -22.4)     | -24.5 (-36 to -15.6)   |      |
|                                      | Deaths      | 22 (13.7 to 31.1)        | 26.7 (17.4 to 36.3)      | 17.9 (10.3 to 26.7)     | 11 (6.6 to 16)         | 13.2 (8.3 to 19.4)     | 9.2 (5.2 to 13.7)      | -50.2 (-62.1 to -35.4) | -50.4 (-62.8 to -34.3)   | -48.6 (-61.9 to -30)   |      |
|                                      | DALYs       | 630.8 (422 to 845.7)     | 787.8 (556 to 1028.9)    | 508 (319.6 to 708.4)    | 317.5 (218.2 to 428.4) | 389.4 (277.1 to 525.2) | 270.6 (179.6 to 376.2) | -49.7 (-59.4 to -36.6) | -50.6 (-61.1 to -36.7)   | -46.7 (-58.1 to -29.1) |      |
| High systolic blood pressure         | YLLs        | 546.8 (362.9 to 732.3)   | 671.3 (468 to 881)       | 448.3 (276.2 to 629.4)  | 244 (160.7 to 341.1)   | 289.9 (194.1 to 400.5) | 212.9 (135 to 302.9)   | -55.4 (-65.5 to -40.9) | -56.8 (-67.5 to -42.3)   | -52.5 (-64 to -35)     |      |
|                                      | YLDs        | 83.9 (52.3 to 120.6)     | 116.5 (75.3 to 162.4)    | 59.7 (35.5 to 88.9)     | 73.5 (46.7 to 101.7)   | 99.6 (65.9 to 135.3)   | 57.8 (36.5 to 82.1)    | -12.4 (-20 to -2.3)    | -14.5 (-22.9 to -4.7)    | -3.2 (-14.9 to 14.1)   |      |
|                                      | Deaths      | 33 (19.5 to 58.1)        | 34.4 (19.5 to 58.6)      | 31.7 (18.6 to 57.4)     | 16 (8.9 to 30.9)       | 17.6 (9.7 to 33.7)     | 14.5 (7.8 to 28.6)     | -51.7 (-64.8 to -37.4) | -48.8 (-64.3 to -30.3)   | -54.3 (-68.6 to -38)   |      |
| High temperature                     | DALYs       | 619 (394.5 to 974.1)     | 663.2 (407.3 to 1024.6)  | 580 (370 to 931.6)      | 289.5 (179.9 to 474.6) | 328 (200.5 to 533.9)   | 261 (156.5 to 444.4)   | -53.2 (-64.3 to -40.1) | -50.5 (-63.5 to -33.9)   | -55 (-67.6 to -39.8)   |      |
|                                      | YLLs        | 548.7 (349.3 to 861.8)   | 576.6 (353.9 to 889.7)   | 525 (334.5 to 838.4)    | 237.2 (145.7 to 399.8) | 263.5 (157 to 445)     | 217.4 (126.7 to 387.4) | -56.8 (-68 to -43.2)   | -54.3 (-67.7 to -36.3)   | -58.6 (-71.4 to -42.8) |      |
|                                      | YLDs        | 70.2 (38 to 117.5)       | 86.6 (46.1 to 145.3)     | 55 (30.4 to 92.3)       | 52.3 (30.5 to 82)      | 64.6 (36.4 to 104.3)   | 43.6 (25.1 to 69.3)    | -25.5 (-37.6 to -9.5)  | -25.5 (-40.8 to -3.2)    | -20.6 (-36.9 to -1.8)  |      |
| High temperature                     | Deaths      | 13.9 (4.4 to 29.7)       | 15.6 (5.1 to 33.5)       | 11.8 (3.7 to 25.6)      | 7.8 (2 to 18.6)        | 8.9 (2.2 to 20.7)      | 6.7 (1.7 to 16.2)      | -43.9 (-59.2 to -30.7) | -43 (-60.8 to -26)       | -43.6 (-59 to -27.9)   |      |
|                                      | DALYs       | 265.7 (134.5 to 466.2)   | 311.2 (159.6 to 541.5)   | 222.7 (111.7 to 392.3)  | 145.6 (68.1 to 271.2)  | 171.5 (80.8 to 315.9)  | 125.2 (58.9 to 236.7)  | -45.2 (-55.6 to -34)   | -44.9 (-56.3 to -32.9)   | -43.8 (-55.3 to -31)   |      |
|                                      | YLLs        | 210.3 (96.9 to 388.2)    | 238.1 (112.2 to 444.8)   | 181.5 (82.1 to 332.9)   | 103.7 (39.1 to 214.2)  | 115.9 (43.5 to 240.2)  | 91.9 (35.4 to 191.3)   | -50.7 (-64.4 to -37.4) | -51.3 (-66.8 to -35.1)   | -49.4 (-63.9 to -34.2) |      |
| High temperature                     | YLDs        | 55.5 (32.4 to 90.5)      | 73.1 (42.3 to 120.2)     | 41.3 (24.2 to 65.4)     | 41.9 (25.3 to 66.8)    | 55.6 (33.8 to 87.3)    | 33.3 (20.1 to 52.9)    | -24.5 (-30.7 to -17.2) | -23.9 (-31.4 to -15)     | -19.3 (-27.8 to -8.5)  |      |
|                                      | Deaths      | 51.1 (40.1 to 65.3)      | 56.3 (42.6 to 71.7)      | 45.5 (34.3 to 62.7)     | 25.6 (18.5 to 35.4)    | 29.3 (20.8 to 40.4)    | 22.3 (15.8 to 32.3)    | -49.8 (-61.7 to -34.9) | -48 (-62.1 to -27.8)     | -50.9 (-63.1 to -35.7) |      |
|                                      | DALYs       | 1033.5 (835.8 to 1274.3) | 1175.2 (916.1 to 1456.9) | 907.4 (712.3 to 1175.2) | 490.3 (383.5 to 626.8) | 570.3 (435.5 to 728.6) | 429.4 (326.5 to 570.9) | -52.6 (-62.5 to -40.1) | -51.5 (-63.4 to -34.2)   | -52.7 (-63.4 to -39.4) |      |
| High temperature                     | YLLs        | 910.1 (731.1 to 1139.8)  | 1016.3 (785.7 to 1274.4) | 814.9 (624.2 to 1073.2) | 398.4 (303.2 to 528.5) | 453.1 (337 to 600.4)   | 354.7 (264.2 to 489.1) | -56.2 (-66.7 to -42.8) | -55.4 (-67.5 to -37.1)   | -56.5 (-67.5 to -42.4) |      |
|                                      | YLDs        | 123.4 (85.8 to 163.6)    | 159 (109 to 212)         | 92.5 (63.4 to 123.5)    | 91.9 (65.5 to 120.8)   | 117.2 (80.6 to 155.8)  | 74.6 (51.7 to 98.2)    | -25.5 (-33.8 to -14.6) | -26.3 (-38.4 to -10.6)   | -19.3 (-29.9 to -5.3)  |      |
|                                      | Deaths      | 3.9 (0.1 to 7.7)         | 4.1 (0.1 to 8.2)         | 3.7 (0.1 to 7.5)        | 2.3 (0.4 to 4.5)       | 2.5 (0.4 to 4.9)       | 2.1 (0.3 to 3.9)       | -41.4 (-67.7 to -21.7) | -38.7 (-66.2 to -15.8)   | -43.9 (-67.6 to -22.2) |      |
| High temperature                     | YLLs        | 66.9 (2.3 to 130.9)      | 72.2 (2.5 to 143.6)      | 62.5 (2.1 to 123.5)     | 33.4 (5.3 to 64)       | 37 (5.8 to 70.9)       | 30.5 (4.9 to 59.1)     | -50.1 (-72.5 to -33.5) | -48.7 (-71.6 to -28.6)   | -51.1 (-72.6 to -32.5) |      |

| Location          | Risk factor                              | Measure                | 1990                      |                           |                           | 2019                      |                           |                           | % Change (1990 to 2019)    |                           |                         |
|-------------------|------------------------------------------|------------------------|---------------------------|---------------------------|---------------------------|---------------------------|---------------------------|---------------------------|----------------------------|---------------------------|-------------------------|
|                   |                                          |                        | Both                      | Female                    | Male                      | Both                      | Female                    | Male                      | Both                       | Female                    | Male                    |
|                   | Household air pollution from solid fuels | Deaths                 | 2.7 (1.1 to 5.1)          | 3.3 (1.4 to 6.3)          | 2 (0.8 to 4.2)            | 0 (0 to 0.1)              | 0.1 (0 to 0.1)            | 0 (0 to 0.1)              | -98.4 (-99.4 to -96.4)     | -98.3 (-99.4 to -96.1)    | -98.5 (-99.4 to -96.4)  |
|                   |                                          | DALYs                  | 57.7 (24.3 to 111)        | 75.8 (31.7 to 141.2)      | 42.5 (15.9 to 88.5)       | 0.9 (0.3 to 2.1)          | 1.2 (0.4 to 3.1)          | 0.6 (0.2 to 1.6)          | -98.5 (-99.4 to -96.4)     | -98.4 (-99.4 to -96.3)    | -98.6 (-99.4 to -96.6)  |
|                   |                                          | YLLs                   | 50.3 (20.8 to 97)         | 64.7 (26.9 to 123.4)      | 37.9 (14.3 to 79.7)       | 0.7 (0.2 to 1.7)          | 0.9 (0.3 to 2.4)          | 0.5 (0.1 to 1.3)          | -98.6 (-99.5 to -96.8)     | -98.6 (-99.5 to -96.6)    | -98.7 (-99.5 to -96.8)  |
|                   |                                          | YLDs                   | 7.5 (3 to 14)             | 11 (4.4 to 20.5)          | 4.6 (1.7 to 9.7)          | 0.2 (0.1 to 0.4)          | 0.3 (0.1 to 0.7)          | 0.1 (0 to 0.3)            | -97.7 (-99.1 to -94.6)     | -97.5 (-99 to -94.3)      | -97.5 (-99 to -94.3)    |
|                   | Kidney dysfunction                       | Deaths                 | 8.6 (5.9 to 11.6)         | 9.9 (6.5 to 13.2)         | 7.4 (5.1 to 10.2)         | 5.8 (3.3 to 8.6)          | 6.5 (3.7 to 9.5)          | 5.2 (3 to 7.8)            | -33 (-50.7 to -14.4)       | -34.3 (-53.9 to -13.7)    | -29.9 (-50.6 to -6.2)   |
|                   |                                          | DALYs                  | 173.3 (133.1 to 218)      | 210.2 (160.2 to 265.1)    | 141.6 (107.7 to 182.7)    | 111.6 (78.4 to 152.8)     | 132.8 (93.7 to 177.4)     | 96.7 (66.9 to 134.9)      | -35.6 (-49.2 to -20.8)     | -36.8 (-50.8 to -19.9)    | -31.7 (-48 to -12.4)    |
|                   |                                          | YLLs                   | 150.9 (114.2 to 191)      | 179.2 (133.4 to 227.4)    | 126.4 (96.1 to 165.9)     | 90.2 (61 to 125.6)        | 104.4 (69.5 to 143.1)     | 79.9 (52.7 to 117.1)      | -40.2 (-54.7 to -23.4)     | -41.7 (-57.3 to -21.8)    | -36.8 (-54.1 to -16)    |
|                   |                                          | YLDs                   | 22.4 (15.2 to 30.4)       | 31 (20.9 to 42.3)         | 15.1 (10.2 to 20.4)       | 21.4 (14.4 to 29)         | 28.4 (18.8 to 38.6)       | 16.8 (11.2 to 22.5)       | -4.3 (-11.6 to 3.7)        | -8.4 (-16.9 to 0.4)       | 10.8 (-0.6 to 22.7)     |
|                   | Lead exposure                            | Deaths                 | 2.6 (0.9 to 4.4)          | 2.3 (0.6 to 4.3)          | 2.9 (1.2 to 4.9)          | 1.2 (0.4 to 2.3)          | 1.1 (0.3 to 2.2)          | 1.3 (0.5 to 2.4)          | -52.3 (-62.7 to -39.3)     | -50.8 (-63.6 to -33.2)    | -53.8 (-64.9 to -39.3)  |
|                   |                                          | DALYs                  | 52.9 (17.5 to 92.6)       | 47.4 (10.3 to 91.1)       | 57.8 (23.5 to 97.1)       | 20.3 (6.2 to 38.2)        | 18.5 (3.5 to 38.2)        | 21.8 (8 to 39.2)          | -61.6 (-70.9 to -52.2)     | -60.9 (-73.1 to -48.9)    | -62.3 (-71.7 to -52.3)  |
|                   |                                          | YLLs                   | 46.9 (15.7 to 82.1)       | 41.2 (9 to 78.5)          | 52 (21.1 to 88.7)         | 17.1 (5.4 to 31.8)        | 15.3 (3.1 to 31.3)        | 18.6 (7 to 33)            | -63.6 (-72.7 to -53.4)     | -62.7 (-74.3 to -49)      | -64.3 (-73.5 to -53.4)  |
|                   |                                          | YLDs                   | 6 (1.7 to 11.3)           | 6.2 (1.2 to 12.7)         | 5.7 (1.9 to 10.1)         | 3.2 (0.7 to 6.6)          | 3.2 (0.4 to 7.3)          | 3.2 (0.9 to 6.3)          | -46.2 (-59.7 to -38.3)     | -48.5 (-70.3 to -38.9)    | -43.9 (-58.2 to -34.1)  |
|                   | Low physical activity                    | Deaths                 | 6.3 (1.5 to 13)           | 6.8 (1.7 to 13.7)         | 5.6 (1.2 to 11.7)         | 4 (1 to 8)                | 4.5 (1.1 to 8.9)          | 3.6 (0.7 to 7)            | -36 (-49.2 to -17.9)       | -34 (-49 to -10.1)        | -36.9 (-52.3 to -14.2)  |
|                   |                                          | DALYs                  | 91.4 (20.7 to 194.3)      | 102.6 (23.6 to 219.6)     | 79.8 (16.2 to 173.6)      | 56.4 (12.5 to 117.5)      | 64.7 (15.1 to 130.7)      | 49.2 (9.4 to 103.2)       | -38.3 (-49.3 to -22.7)     | -37 (-49.3 to -16.9)      | -38.4 (-51.9 to -19)    |
|                   |                                          | YLLs                   | 77.6 (17.4 to 165.1)      | 84.9 (19.9 to 179.1)      | 69.7 (14.3 to 151.6)      | 45.5 (10.1 to 91.9)       | 50.6 (12.2 to 101.9)      | 40.6 (7.9 to 83)          | -41.4 (-53.8 to -23.2)     | -40.4 (-54.3 to -16.9)    | -41.8 (-56 to -20.5)    |
|                   |                                          | YLDs                   | 13.9 (2.7 to 32.7)        | 17.7 (3.8 to 41.3)        | 10.2 (1.8 to 24.8)        | 11 (2 to 25.9)            | 14.1 (2.8 to 33)          | 8.7 (1.4 to 20.7)         | -20.9 (-29.2 to -11.6)     | -20.6 (-30.7 to -8.2)     | -15 (-25.3 to -1.7)     |
|                   | Low temperature                          | Deaths                 | 3 (-2.3 to 7.9)           | 3.2 (-2.4 to 8.4)         | 2.8 (-2.2 to 7.6)         | 1.5 (-1 to 4)             | 1.7 (-1.1 to 4.4)         | 1.4 (-0.9 to 3.6)         | -                          | -                         | -                       |
|                   |                                          | YLLs                   | 51.1 (-39.5 to 135.2)     | 55 (-42.5 to 145.7)       | 47.7 (-37.2 to 128.1)     | 22.3 (-14.1 to 56.6)      | 24.7 (-16.1 to 63.9)      | 20.4 (-12.9 to 54.1)      | -                          | -                         | -                       |
|                   | Secondhand smoke                         | Deaths                 | 3.1 (2.3 to 4.1)          | 3.7 (2.7 to 4.8)          | 2.6 (1.9 to 3.6)          | 1.3 (0.9 to 1.9)          | 1.5 (1.1 to 2.1)          | 1.2 (0.8 to 1.7)          | -57.6 (-67.2 to -44.5)     | -58.7 (-69.5 to -44.1)    | -55.2 (-66.9 to -38.5)  |
|                   |                                          | DALYs                  | 68.4 (50.4 to 88.5)       | 85.5 (61.6 to 111.7)      | 55.1 (39.6 to 73)         | 27.4 (19.4 to 37.8)       | 33.5 (23.7 to 45.4)       | 23.6 (16.2 to 34)         | -60 (-68.5 to -48.1)       | -60.8 (-69.9 to -48.1)    | -57.2 (-67.7 to -42.5)  |
| YLLs              |                                          | 62.9 (46 to 82)        | 77.7 (56 to 101.8)        | 51.4 (36.9 to 68.2)       | 23.6 (16.6 to 33.4)       | 28.2 (19.7 to 38.5)       | 20.8 (14 to 30.5)         | -62.5 (-71.2 to -49.8)    | -63.7 (-73.3 to -50.6)     | -59.6 (-70.6 to -44.4)    |                         |
| YLDs              |                                          | 5.5 (3.6 to 7.6)       | 7.9 (5.1 to 10.9)         | 3.7 (2.4 to 5.2)          | 3.8 (2.5 to 5.2)          | 5.4 (3.5 to 7.4)          | 2.8 (1.9 to 4)            | -31.3 (-38.6 to -23.6)    | -32 (-40.4 to -22)         | -23.2 (-34.4 to -8.8)     |                         |
| Smoking           | Deaths                                   | 12.6 (10.3 to 15.9)    | 9 (6.3 to 12.2)           | 16.5 (13.4 to 21.2)       | 4.3 (3.3 to 5.9)          | 2.5 (1.7 to 3.6)          | 5.9 (4.6 to 8.3)          | -66 (-74.9 to -55.1)      | -72 (-82.1 to -56.4)       | -64.1 (-73.5 to -52.2)    |                         |
|                   | DALYs                                    | 311.2 (255.6 to 381.9) | 233.1 (163 to 313.9)      | 379.6 (312.9 to 461.9)    | 105 (82.9 to 135.7)       | 63 (44.2 to 90.1)         | 135.6 (106.9 to 177.2)    | -66.2 (-74.3 to -55.7)    | -73 (-82.3 to -59.2)       | -64.3 (-72.5 to -53.6)    |                         |
|                   | YLLs                                     | 272.9 (221.4 to 340.7) | 200.1 (137.7 to 273.6)    | 337.5 (272.6 to 417.6)    | 83 (64.1 to 111.4)        | 48.5 (33.1 to 69.5)       | 109 (83.2 to 150.3)       | -69.6 (-77.4 to -59.3)    | -75.8 (-84.5 to -61.3)     | -67.7 (-76.2 to -56.3)    |                         |
|                   | YLDs                                     | 38.4 (26.7 to 50)      | 33 (21.4 to 47.9)         | 42.1 (29.7 to 54.7)       | 22 (15 to 28.9)           | 14.5 (9 to 21.1)          | 26.6 (18.6 to 34.6)       | -42.6 (-52.2 to -30.6)    | -56.1 (-69.7 to -37)       | -36.9 (-45.6 to -26.5)    |                         |
| Egypt             | All risk factors                         | Deaths                 | 79.8 (65.7 to 97.7)       | 83.9 (64.3 to 100.8)      | 75.7 (62.9 to 105)        | 72.4 (51.3 to 101.5)      | 89.8 (62.3 to 124.6)      | 63.6 (43.7 to 94.4)       | -9.3 (-33.7 to 21.7)       | 7 (-21.9 to 45.7)         | -16 (-39.9 to 15.4)     |
|                   |                                          | DALYs                  | 1933.1 (1656.1 to 2236.4) | 1968.9 (1569.5 to 2270.5) | 1892.7 (1614.3 to 2361.3) | 1755 (1315 to 2369.7)     | 1975.6 (1464.3 to 2627.9) | 1625.3 (1172.4 to 2310.1) | -9.2 (-30.9 to 17.3)       | 0.3 (-24.7 to 32.3)       | -14.1 (-36.3 to 15)     |
|                   |                                          | YLLs                   | 1735.2 (1460.9 to 2028)   | 1733.6 (1342.3 to 2019.4) | 1732.5 (1456.9 to 2173.8) | 1505.2 (1079.4 to 2119.2) | 1663.2 (1160.5 to 2331.8) | 1425.9 (975.8 to 2109.1)  | -13.3 (-36.9 to 15.9)      | -4.1 (-30.8 to 31.8)      | -17.7 (-41.7 to 14.5)   |
|                   |                                          | YLDs                   | 197.9 (143.9 to 255.2)    | 235.4 (169 to 305.7)      | 160.2 (115 to 207.1)      | 249.9 (181.2 to 317.1)    | 312.3 (227.5 to 397.2)    | 199.3 (143.2 to 255.1)    | 26.2 (18.6 to 33.8)        | 32.7 (22.7 to 43.7)       | 24.4 (15.3 to 34.6)     |
|                   | Alcohol use                              | Deaths                 | 0.1 (-0.1 to 0.4)         | -0.1 (-0.2 to 0)          | 0.3 (0 to 0.9)            | 0 (-0.1 to 0.2)           | -0.1 (-0.3 to 0)          | 0.2 (-0.1 to 0.6)         | -69.3 (-538.7 to 272.6)    | 109.2 (-926.4 to 915.5)   | -47.5 (-212.7 to 145.1) |
|                   |                                          | DALYs                  | 5.3 (-0.8 to 13.9)        | -1.1 (-3.5 to 1.8)        | 11.7 (0 to 27.6)          | 2.4 (-2.6 to 8.9)         | -2.8 (-5.6 to -0.1)       | 6.8 (-2 to 18.6)          | -55.1 (-397.6 to 223.5)    | 142 (-1274.3 to 1502.4)   | -41.5 (-161.5 to 148.3) |
|                   |                                          | YLLs                   | 5.3 (-0.4 to 13.5)        | -0.7 (-2.9 to 2)          | 11.3 (0.3 to 26.5)        | 2.5 (-2 to 8.4)           | -2.1 (-4.6 to 0.1)        | 6.5 (-1.4 to 17.1)        | -53.3 (-280.2 to 168.9)    | 188.3 (-1063.3 to 1824.5) | -42.6 (-133.5 to 155.2) |
|                   |                                          | YLDs                   | 0 (-0.5 to 0.6)           | -0.4 (-0.7 to -0.1)       | 0.4 (-0.5 to 1.5)         | -0.1 (-0.7 to 0.6)        | -0.6 (-1.1 to -0.1)       | 0.4 (-0.7 to 1.6)         | -695.4 (-1700.9 to 1118.4) | 54.6 (1.7 to 146)         | -13.6 (-509.4 to 945.6) |
|                   | Ambient particulate matter pollution     | Deaths                 | 28.5 (21.3 to 36.6)       | 28.8 (20.2 to 37.1)       | 28.2 (21.2 to 38.9)       | 27.9 (19.2 to 39.9)       | 33.3 (22.1 to 47.8)       | 24.9 (16.5 to 37.2)       | -2.1 (-28.5 to 35.2)       | 15.8 (-18.5 to 63.2)      | -11.6 (-37.8 to 24.7)   |
|                   |                                          | DALYs                  | 738.7 (565.9 to 920.7)    | 729.9 (527.2 to 929.8)    | 746 (575.8 to 986.3)      | 733.5 (527.3 to 1009)     | 811.4 (576.7 to 1118.3)   | 684.3 (478.7 to 974.4)    | -0.7 (-24.8 to 32.4)       | 11.2 (-18.6 to 51)        | -8.3 (-33 to 26.3)      |
|                   |                                          | YLLs                   | 659.7 (498.8 to 833)      | 637.9 (450.5 to 821)      | 679.9 (516.6 to 912.8)    | 625.2 (431.4 to 897.6)    | 676.8 (456.2 to 972.7)    | 597.8 (400 to 889)        | -5.2 (-32.5 to 31.2)       | 6.1 (-26.1 to 49.7)       | -12.1 (-38.4 to 25.8)   |
|                   |                                          | YLDs                   | 79 (55.4 to 107.7)        | 92 (62.9 to 125.7)        | 66.1 (45.4 to 90.1)       | 108.3 (75 to 141.6)       | 134.6 (94 to 175.6)       | 86.5 (59.6 to 113.7)      | 37 (23.5 to 60.3)          | 46.3 (28 to 77.4)         | 30.9 (17.7 to 51.6)     |
|                   | Diet high in red meat                    | Deaths                 | 2.8 (1 to 4.5)            | 2.9 (1 to 4.7)            | 2.7 (0.9 to 4.5)          | 2.9 (1 to 5.1)            | 3.3 (1.1 to 5.9)          | 2.7 (0.9 to 4.8)          | 4.1 (-38.3 to 67)          | 17 (-35.5 to 98.3)        | -1.3 (-40.7 to 62.3)    |
|                   |                                          | DALYs                  | 83 (27.6 to 132.8)        | 82.6 (28.5 to 133.9)      | 83.3 (27.8 to 133.4)      | 89.6 (32.9 to 150.7)      | 94.7 (33.9 to 160.4)      | 86.9 (30.5 to 150.2)      | 8 (-33.1 to 78.2)          | 14.7 (-33.3 to 94.5)      | 4.3 (-34.5 to 75.7)     |
|                   |                                          | YLLs                   | 74.1 (24.5 to 119.5)      | 72 (23.7 to 117.5)        | 76.1 (24.6 to 122.6)      | 76.2 (27.7 to 132.1)      | 78.2 (27.4 to 138.4)      | 76.2 (27.1 to 134.2)      | 2.8 (-39.5 to 79.2)        | 8.7 (-39.5 to 94)         | 0.1 (-38.8 to 75.6)     |
|                   |                                          | YLDs                   | 8.9 (2.7 to 14.9)         | 10.6 (3.2 to 17.9)        | 7.2 (2.2 to 12)           | 13.4 (4.1 to 21.9)        | 16.5 (5 to 27.6)          | 10.7 (3.3 to 17.5)        | 50.8 (19.6 to 89.7)        | 55.8 (22 to 98.9)         | 49 (18 to 91.2)         |
|                   | Diet high in sodium                      | Deaths                 | 1.7 (0.2 to 6.9)          | 1.2 (0.3 to 5)            | 2.2 (0.2 to 8.8)          | 1.5 (0.2 to 6.1)          | 1.2 (0.3 to 5)            | 1.7 (0.1 to 7.2)          | -13.5 (-51.7 to 53.8)      | -3.7 (-56.8 to 98.9)      | -20 (-57.9 to 65)       |
|                   |                                          | DALYs                  | 45.1 (5.3 to 181.4)       | 31.6 (5.6 to 130.5)       | 58.5 (4.2 to 232)         | 39.6 (4.7 to 160.3)       | 29.7 (5.7 to 124.3)       | 48.7 (3.3 to 195.5)       | -12.2 (-50.7 to 56.9)      | -6.1 (-57.9 to 114.9)     | -16.8 (-53.1 to 72)     |
|                   |                                          | YLLs                   | 40.7 (4.7 to 163.6)       | 27.8 (4.8 to 115.2)       | 53.4 (3.8 to 212.2)       | 34.2 (3.9 to 140.8)       | 24.9 (4.6 to 106.6)       | 42.6 (2.9 to 173.7)       | -16 (-53.5 to 53.9)        | -10.5 (-60.3 to 108.1)    | -20.2 (-56.2 to 66.4)   |
|                   |                                          | YLDs                   | 4.4 (0.5 to 17.9)         | 3.8 (0.7 to 16)           | 5 (0.3 to 20.1)           | 5.5 (0.7 to 21.4)         | 4.8 (0.9 to 20.2)         | 6 (0.4 to 22.6)           | 23.3 (-29.5 to 110.9)      | 26.3 (-40.2 to 173.6)     | 19.9 (-20.1 to 144.2)   |
| Diet low in fiber | Deaths                                   | 0.7 (0.2 to 1.5)       | 0.7 (0.2 to 1.5)          | 0.7 (0.2 to 1.6)          | 0.3 (0.2 to 0.6)          | 0.4 (0.2 to 0.7)          | 0.3 (0.1 to 0.6)          | -55 (-72.1 to -18.9)      | -45.9 (-70.2 to 3.5)       | -58.6 (-74.6 to -25.1)    |                         |
|                   | DALYs                                    | 16.9 (5.4 to 39.5)     | 15.6 (5.4 to 34.3)        | 18.2 (5.3 to 45.4)        | 7.5 (3.9 to 15.4)         | 7.7 (4.3 to 15.5)         | 7.6 (3.5 to 17.2)         | -55.6 (-70.2 to -21.1)    | -50.7 (-71.2 to -8.5)      | -57.9 (-72.9 to -26.2)    |                         |
|                   | YLLs                                     | 15.2 (4.8 to 35.7)     | 13.6 (4.7 to 30.2)        | 16.7 (4.8 to 41.3)        | 6.4 (3.2 to 13.6)         | 6.4 (3.4 to 13.2)         | 6.7 (3 to 15.5)           | -57.5 (-72.6 to -23.5)    | -52.7 (-73.5 to -10)       | -59.6 (-74.9 to -27.3)    |                         |

| Location                                 | Risk factor | Measure | 1990                     |                          |                         | 2019                     |                          |                         | % Change (1990 to 2019) |                        |                        |
|------------------------------------------|-------------|---------|--------------------------|--------------------------|-------------------------|--------------------------|--------------------------|-------------------------|-------------------------|------------------------|------------------------|
|                                          |             |         | Both                     | Female                   | Male                    | Both                     | Female                   | Male                    | Both                    | Female                 | Male                   |
| Diet low in fruits                       | Deaths      | YLDs    | 1.7 (0.6 to 3.9)         | 2 (0.7 to 4.5)           | 1.5 (0.5 to 3.4)        | 1.1 (0.6 to 2.1)         | 1.2 (0.7 to 2.5)         | 0.9 (0.4 to 2)          | -38.5 (-53.7 to 5.5)    | -36.3 (-56.9 to 12.1)  | -38.9 (-56.2 to 3.8)   |
|                                          |             | DALYs   | 4.7 (2.1 to 8.3)         | 4.9 (2.2 to 8.8)         | 4.5 (2 to 7.9)          | 1.8 (0.8 to 3.2)         | 2.2 (0.9 to 4.1)         | 1.5 (0.6 to 2.9)        | -62.5 (-78.1 to -38.9)  | -55.6 (-76.2 to -23.6) | -65.5 (-80.4 to -41.8) |
|                                          |             | YLLs    | 134 (61.8 to 232.5)      | 136 (63.7 to 240.1)      | 131.9 (60.5 to 233.3)   | 54.3 (24 to 97)          | 59.8 (24.8 to 108.2)     | 51 (22.1 to 95.8)       | -59.5 (-75.1 to -34.6)  | -56 (-75.8 to -26.1)   | -61.3 (-77.6 to -37.4) |
| Diet low in vegetables                   | Deaths      | YLDs    | 121.1 (56.3 to 213.7)    | 120.3 (56.6 to 214.7)    | 121.6 (55.7 to 219.4)   | 46.7 (20.6 to 86.5)      | 50 (21 to 90.6)          | 45.4 (19.5 to 87.3)     | -61.4 (-76.7 to -36.9)  | -58.4 (-77.4 to -26.9) | -62.7 (-78.9 to -38.4) |
|                                          |             | DALYs   | 13 (4.8 to 23.9)         | 15.7 (5.8 to 28.7)       | 10.3 (3.8 to 18.9)      | 7.6 (2.6 to 13.9)        | 9.8 (3.3 to 18.3)        | 5.6 (1.9 to 10.6)       | -41.7 (-60.5 to -19)    | -37.5 (-59.5 to -11)   | -45.3 (-64.7 to -19.2) |
|                                          |             | YLLs    | 0.5 (0.2 to 1)           | 0.4 (0.2 to 0.9)         | 0.5 (0.2 to 1.1)        | 0.2 (0.1 to 0.3)         | 0.2 (0.2 to 0.3)         | 0.2 (0.1 to 0.2)        | -60.6 (-81 to -15.1)    | -49 (-76.8 to 8.6)     | -66.7 (-85.2 to -20.4) |
| Diet low in whole grains                 | Deaths      | YLDs    | 9 (4.3 to 20.5)          | 8.2 (4.3 to 16.6)        | 9.8 (4.1 to 23.7)       | 4 (3 to 5.3)             | 4.6 (3.3 to 6.1)         | 3.6 (2.6 to 5.1)        | -56.1 (-80.7 to -8.4)   | -44.5 (-74.6 to 6.8)   | -63.3 (-85 to -14.5)   |
|                                          |             | DALYs   | 8.1 (3.8 to 18.9)        | 7.3 (3.7 to 15.3)        | 9 (3.7 to 22.2)         | 3.4 (2.4 to 4.8)         | 3.8 (2.6 to 5.4)         | 3.1 (2.2 to 4.7)        | -58.3 (-82.1 to -10.8)  | -47 (-76.3 to 6.1)     | -65 (-86.1 to -16.8)   |
|                                          |             | YLLs    | 0.9 (0.4 to 1.9)         | 1 (0.5 to 1.9)           | 0.8 (0.3 to 1.9)        | 0.6 (0.4 to 0.7)         | 0.7 (0.5 to 0.9)         | 0.5 (0.3 to 0.6)        | -36.3 (-67.5 to 16.9)   | -25.8 (-61.2 to 24.6)  | -44.8 (-72.4 to 16)    |
| High body-mass index                     | Deaths      | YLDs    | 2.3 (0.6 to 3.6)         | 2.3 (0.6 to 3.8)         | 2.2 (0.5 to 3.8)        | 2.7 (0.7 to 4.7)         | 3.3 (0.8 to 5.8)         | 2.4 (0.6 to 4.3)        | 19.7 (-15.3 to 58.6)    | 40 (-2.8 to 90)        | 11.9 (-24.7 to 54.6)   |
|                                          |             | DALYs   | 54.9 (13.5 to 85.6)      | 56.1 (13.9 to 90.3)      | 53.7 (12.8 to 89.4)     | 71.7 (17.5 to 120.5)     | 79.6 (18.5 to 136.7)     | 67 (15.9 to 115.6)      | 30.4 (-7.1 to 66.8)     | 41.9 (4.7 to 84.4)     | 24.7 (-15.7 to 66.5)   |
|                                          |             | YLLs    | 44 (10.8 to 71.4)        | 43.2 (10.7 to 71.3)      | 44.8 (10.3 to 79.5)     | 57.9 (14.1 to 102)       | 62.7 (14.7 to 114.8)     | 55.9 (12.9 to 100.7)    | 31.5 (-12.4 to 76.5)    | 45.2 (-0.6 to 103.6)   | 24.8 (-20.2 to 74.3)   |
| High fasting plasma glucose              | Deaths      | YLDs    | 10.9 (2.7 to 17.8)       | 12.9 (3.1 to 21.1)       | 8.9 (2.2 to 14.7)       | 13.7 (3.3 to 22.3)       | 16.9 (4 to 27.5)         | 11.1 (2.6 to 18.2)      | 25.9 (13.1 to 35.7)     | 30.9 (15.8 to 44.7)    | 24.3 (10.7 to 37.3)    |
|                                          |             | DALYs   | 23.2 (14.1 to 33.5)      | 27.7 (17.2 to 38.4)      | 18.8 (10.1 to 29.5)     | 25 (14.9 to 38.6)        | 30.2 (18.4 to 47.1)      | 21.4 (12.1 to 35.4)     | 7.7 (-25.1 to 51.4)     | 9.1 (-25 to 56.2)      | 14.2 (-22.7 to 74.7)   |
|                                          |             | YLLs    | 775.3 (497 to 1071.6)    | 904 (597.3 to 1197.4)    | 647.4 (367.6 to 962.4)  | 829 (545.9 to 1208.4)    | 935.9 (619.5 to 1346.2)  | 748.6 (464.8 to 1145.5) | 6.9 (-21.9 to 44.8)     | 3.5 (-24.6 to 41.1)    | 15.6 (-19.7 to 75.3)   |
| High LDL cholesterol                     | Deaths      | YLDs    | 696.5 (442.5 to 972.7)   | 796.8 (509.1 to 1061)    | 596.6 (338.1 to 892.1)  | 709.3 (449.5 to 1066.8)  | 777.4 (491.4 to 1169)    | 662.5 (401.1 to 1050.3) | 1.8 (-28.9 to 43.3)     | -2.4 (-32.6 to 39.3)   | 11 (-25.5 to 73.6)     |
|                                          |             | DALYs   | 78.8 (47.7 to 117)       | 107.2 (67.5 to 152)      | 50.8 (26.9 to 81)       | 119.7 (77.4 to 166.8)    | 158.5 (103.8 to 217.1)   | 86.2 (53 to 124.2)      | 51.9 (35.8 to 78.3)     | 47.8 (32.4 to 72.2)    | 69.5 (41 to 131.8)     |
|                                          |             | YLLs    | 11.5 (6.5 to 21.2)       | 14.3 (7.8 to 28)         | 8.4 (5.1 to 14.5)       | 23.8 (12.2 to 44.2)      | 31.9 (15 to 61.8)        | 19 (9 to 37.6)          | 107.1 (31.9 to 205.1)   | 122.7 (35.8 to 245.5)  | 125.3 (36.7 to 245.5)  |
| High systolic blood pressure             | Deaths      | YLDs    | 226.6 (144.1 to 365.4)   | 270.6 (165.7 to 462.3)   | 179.6 (114.3 to 285.5)  | 526.7 (295.2 to 920.9)   | 658.5 (352.8 to 1142)    | 434.9 (216.8 to 799.6)  | 132.5 (50.4 to 233.2)   | 143.4 (50.8 to 262.6)  | 142.2 (47.5 to 268.2)  |
|                                          |             | DALYs   | 202 (126.8 to 329)       | 238 (144 to 410.2)       | 163.2 (103.3 to 260.3)  | 449.6 (244.1 to 799.4)   | 556.1 (284.4 to 987.1)   | 377.7 (185.1 to 715.4)  | 122.6 (40.8 to 227.6)   | 133.7 (38.7 to 256.4)  | 131.4 (35.2 to 262.4)  |
|                                          |             | YLLs    | 24.6 (13.7 to 41.3)      | 32.6 (17.5 to 57.7)      | 16.3 (9.2 to 27.3)      | 77.1 (40.7 to 131.3)     | 102.4 (53.2 to 179.3)    | 57.1 (28.3 to 99)       | 213.1 (133.5 to 312.2)  | 214.2 (125.5 to 319.5) | 249.9 (137.2 to 383.1) |
| High temperature                         | Deaths      | YLDs    | 9.3 (3.7 to 19.2)        | 10.3 (3.8 to 21.8)       | 8.2 (3.4 to 18)         | 12.2 (5.3 to 23.6)       | 16.1 (6 to 33.3)         | 10.3 (4.8 to 20.7)      | 32.1 (-4 to 85.1)       | 56.5 (10.7 to 117.9)   | 25.2 (-13.1 to 88.2)   |
|                                          |             | DALYs   | 222.5 (126.2 to 381.7)   | 241.6 (128.2 to 432.2)   | 202.9 (118.2 to 382.7)  | 325.4 (192.5 to 531.1)   | 384.5 (213.3 to 669.6)   | 287.1 (170.6 to 491.4)  | 46.2 (9.2 to 91)        | 59.1 (18.5 to 108.3)   | 41.5 (-0.7 to 98.5)    |
|                                          |             | YLLs    | 177.1 (96.4 to 318.3)    | 185 (87.1 to 344.7)      | 168.7 (94.3 to 319.3)   | 261.9 (147.8 to 441.4)   | 302.2 (155 to 544.4)     | 239.4 (137.1 to 423.6)  | 47.9 (2.6 to 105.5)     | 63.3 (12.4 to 132.7)   | 42 (-7.3 to 111.8)     |
| Household air pollution from solid fuels | Deaths      | YLDs    | 45.4 (26.3 to 74.3)      | 56.5 (32.8 to 93.2)      | 34.2 (19.9 to 55)       | 63.4 (38.2 to 101.6)     | 82.2 (48.9 to 133.1)     | 47.7 (28.5 to 76.4)     | 39.8 (29.5 to 52.2)     | 45.4 (32 to 60.9)      | 39.5 (25.2 to 56.5)    |
|                                          |             | DALYs   | 42.9 (32.7 to 55.1)      | 47.1 (33.9 to 61.7)      | 38.7 (28.3 to 54.9)     | 42.2 (28.2 to 61.3)      | 54.5 (34.5 to 78.7)      | 35.3 (22.8 to 55)       | -1.6 (-32.8 to 37.4)    | 15.7 (-24.8 to 72.9)   | -8.7 (-38.5 to 32.5)   |
|                                          |             | YLLs    | 1035.5 (806.5 to 1280.5) | 1093.2 (803.2 to 1389.7) | 975.1 (744.9 to 1316.1) | 1068.5 (757.4 to 1481.4) | 1255.5 (872.9 to 1710.6) | 943.6 (644.9 to 1405.9) | 3.2 (-24.4 to 37.1)     | 14.9 (-18.8 to 62.8)   | -3.2 (-31 to 36.3)     |
| Kidney dysfunction                       | Deaths      | YLDs    | 927.3 (715.6 to 1155.5)  | 961.3 (688.2 to 1228.5)  | 890.6 (674.5 to 1236.6) | 913.1 (616.7 to 1328.7)  | 1054.4 (694.5 to 1526.7) | 825.5 (535.1 to 1279.7) | -1.5 (-31.1 to 35.7)    | 9.7 (-25.5 to 60.7)    | -7.3 (-36.8 to 34.1)   |
|                                          |             | DALYs   | 108.3 (73.4 to 145.4)    | 131.9 (86.1 to 180.9)    | 84.5 (56.3 to 115.3)    | 155.4 (108.5 to 205.4)   | 201.1 (140.5 to 267.1)   | 118.2 (80.8 to 158.8)   | 43.5 (25 to 69.1)       | 52.5 (25.5 to 89.6)    | 39.9 (19.1 to 67.2)    |
|                                          |             | YLLs    | 1.7 (0 to 5.4)           | 1.7 (0 to 5.5)           | 1.6 (0 to 5.4)          | 1.8 (0.3 to 4.7)         | 2.3 (0.3 to 5.9)         | 1.6 (0.2 to 4.2)        | 10.9 (-74.5 to 142.7)   | 33.6 (-70.5 to 202.2)  | 1 (-77.7 to 126.1)     |
| Lead exposure                            | Deaths      | YLDs    | 45.8 (1 to 151.5)        | 42.8 (0.8 to 141.9)      | 48.6 (1.2 to 168.1)     | 39.7 (5.6 to 100.1)      | 42.2 (6.2 to 107.7)      | 39.1 (5.5 to 102.1)     | -13.3 (-80.4 to 86.7)   | -1.2 (-78.2 to 112.5)  | -19.5 (-82.6 to 74.4)  |
|                                          |             | DALYs   | 4.6 (2.1 to 8.7)         | 5.6 (2.6 to 10.6)        | 3.6 (1.5 to 7.1)        | 0 (0 to 0.1)             | 0 (0 to 0.1)             | 0 (0 to 0)              | -99.5 (-99.8 to -98.8)  | -99.4 (-99.8 to -98.5) | -99.5 (-99.8 to -98.9) |
|                                          |             | YLLs    | 119.1 (54.1 to 221.1)    | 142.4 (67.5 to 262.9)    | 95.5 (41 to 186.5)      | 0.6 (0.2 to 1.4)         | 0.8 (0.3 to 1.9)         | 0.4 (0.1 to 1.1)        | -99.5 (-99.8 to -98.7)  | -99.4 (-99.8 to -98.6) | -99.5 (-99.8 to -98.8) |
| Low physical activity                    | Deaths      | YLDs    | 105.8 (48.2 to 200.7)    | 124.5 (58.4 to 235.7)    | 87 (37.3 to 169.9)      | 0.5 (0.2 to 1.2)         | 0.7 (0.2 to 1.6)         | 0.4 (0.1 to 0.9)        | -99.5 (-99.8 to -98.8)  | -99.5 (-99.8 to -98.6) | -99.6 (-99.8 to -98.9) |
|                                          |             | DALYs   | 13.2 (5.8 to 25.3)       | 17.9 (8 to 33.8)         | 8.5 (3.4 to 17)         | 0.1 (0 to 0.2)           | 0.1 (0 to 0.3)           | 0.1 (0 to 0.1)          | -99.3 (-99.7 to -98.3)  | -99.2 (-99.7 to -98.2) | -99.3 (-99.7 to -98.4) |
|                                          |             | YLLs    | 7.7 (5.6 to 10.3)        | 9.1 (6.3 to 12.3)        | 6.3 (4.5 to 9)          | 10 (6.3 to 15.1)         | 12.8 (7.5 to 20.2)       | 8.2 (4.9 to 13.1)       | 30.1 (-8 to 75.7)       | 40.5 (-6.1 to 100.2)   | 29.9 (-9.9 to 80.5)    |
| Low temperature                          | Deaths      | YLDs    | 176.1 (137 to 219.8)     | 206.6 (155 to 262.4)     | 145.1 (110.2 to 195.1)  | 237.5 (167.1 to 335.2)   | 293 (196.3 to 420.2)     | 195.3 (131.4 to 291.2)  | 34.9 (0.4 to 75.2)      | 41.8 (2.4 to 92.7)     | 34.6 (-1.9 to 80.9)    |
|                                          |             | DALYs   | 154.7 (117.5 to 196.5)   | 178.4 (130.4 to 228.8)   | 130.6 (97.9 to 178.8)   | 200.4 (133.4 to 295)     | 243.5 (156.2 to 365.8)   | 168.4 (109.1 to 265.1)  | 29.5 (-9.3 to 74.9)     | 36.5 (-6.3 to 95.7)    | 29 (-10.5 to 80.9)     |
|                                          |             | YLLs    | 21.4 (14.5 to 29.1)      | 28.2 (19.2 to 38.3)      | 14.5 (9.6 to 19.7)      | 37.1 (24.8 to 50.4)      | 49.5 (33 to 67.3)        | 26.9 (17.9 to 36.4)     | 73.5 (59.6 to 86.4)     | 75.4 (59.1 to 91.8)    | 85.1 (65 to 104.6)     |
| Low temperature                          | Deaths      | YLDs    | 6.2 (3.9 to 8.9)         | 5.2 (3 to 7.8)           | 7.2 (4.7 to 10.5)       | 5.2 (2.9 to 8.3)         | 5.3 (2.7 to 8.5)         | 5.3 (2.9 to 8.9)        | -16.7 (-40.8 to 13.3)   | 0.9 (-30.8 to 40.8)    | -26.5 (-49.2 to 3.3)   |
|                                          |             | DALYs   | 159.4 (102.3 to 222)     | 131.7 (75.1 to 195.7)    | 186.7 (123.3 to 266.3)  | 118.1 (65.7 to 186.6)    | 112.1 (58.3 to 178.1)    | 125.3 (71.4 to 204.1)   | -25.9 (-45.2 to -2.3)   | -14.9 (-39.4 to 15)    | -32.9 (-51.6 to -8.5)  |
|                                          |             | YLLs    | 143.3 (91.1 to 201.6)    | 115.7 (65 to 171.9)      | 170.6 (112.2 to 248)    | 101.5 (54.5 to 164)      | 94.8 (47.4 to 154.9)     | 109.3 (58.1 to 185)     | -29.2 (-49.7 to -2.5)   | -18.1 (-44.4 to 15.4)  | -35.9 (-56.3 to -9.3)  |
| Low temperature                          | Deaths      | YLDs    | 16.1 (9.5 to 24.2)       | 16 (8.8 to 24.7)         | 16.2 (9.9 to 23.6)      | 16.6 (9.2 to 25.4)       | 17.3 (9.1 to 27)         | 16 (9.3 to 24)          | 2.9 (-9.6 to 13)        | 8.3 (-7.9 to 23)       | -1.2 (-15.2 to 10.7)   |
|                                          |             | DALYs   | 4.4 (0.9 to 9.6)         | 4.8 (1.1 to 10.5)        | 3.9 (0.7 to 8.7)        | 5.3 (1.1 to 12.2)        | 7.5 (1.7 to 16.1)        | 4.3 (0.7 to 10.5)       | 22.8 (-12.6 to 63.7)    | 54.8 (7.6 to 119)      | 11.2 (-25.1 to 53.9)   |
|                                          |             | YLLs    | 73.6 (13.9 to 175.6)     | 80.5 (17.5 to 190.5)     | 66.5 (10.9 to 162.5)    | 100 (17.4 to 238.4)      | 127.2 (26.6 to 287.7)    | 83.7 (12.5 to 217)      | 35.8 (-1.8 to 74.6)     | 58 (13.9 to 111.1)     | 25.9 (-12.8 to 68.5)   |
| Low temperature                          | Deaths      | YLDs    | 61.5 (12 to 148.8)       | 65.8 (14.5 to 154)       | 57.2 (9.4 to 142.7)     | 83.1 (14.8 to 201)       | 105.1 (22.1 to 235.8)    | 70.8 (11 to 189.6)      | 35 (-7.5 to 79.7)       | 59.9 (8.6 to 121.6)    | 23.9 (-17.9 to 72.3)   |
|                                          |             | DALYs   | 12.1 (2.2 to 30.4)       | 14.8 (2.8 to 36.5)       | 9.3 (1.5 to 24.2)       | 16.9 (3 to 41.8)         | 22.1 (4.4 to 52.7)       | 12.9 (2 to 33.4)        | 40 (23.9 to 62.1)       | 49.6 (30.3 to 80.4)    | 38.6 (20.2 to 66.1)    |
|                                          |             | YLLs    | 4.5 (-0.1 to 9.7)        | 4.6 (-0.1 to 9.9)        | 4.3 (-0.1 to 9.8)       | 3.5 (-0.1 to 8.1)        | 4.3 (-0.1 to 10)         | 3.1 (-0.1 to 7.3)       | -21.5 (-61.8 to 17.9)   | -5.3 (-57.4 to 44)     | -28.7 (-63.5 to 6.1)   |
| Low temperature                          | Deaths      | YLDs    | 123.3 (-1.8 to 269.1)    | 115.2 (-1.6 to 252.7)    | 130.8 (-1.9 to 284.6)   | 75.6 (-1.8 to 172)       | 80.6 (-1.9 to 186.8)     | 74.3 (-1.8 to 166.9)    | -38.7 (-68.7 to -7.9)   | -30 (-68 to 4.6)       | -43.2 (-69.7 to -14.1) |



| Location                   | Risk factor                          | Measure | 1990                      |                           |                           | 2019                     |                        |                        | % Change (1990 to 2019)   |                             |                           |
|----------------------------|--------------------------------------|---------|---------------------------|---------------------------|---------------------------|--------------------------|------------------------|------------------------|---------------------------|-----------------------------|---------------------------|
|                            |                                      |         | Both                      | Female                    | Male                      | Both                     | Female                 | Male                   | Both                      | Female                      | Male                      |
|                            | Secondhand smoke                     | Deaths  | 4.1 (3 to 5.4)            | 5.2 (3.6 to 6.7)          | 3.1 (2.2 to 4.4)          | 3 (1.9 to 4.4)           | 4.4 (2.8 to 6.5)       | 1.9 (1.2 to 3.1)       | -28 (-48.9 to -3.7)       | -15.7 (-40.6 to 15.9)       | -36.5 (-55.9 to -10.3)    |
|                            |                                      | DALYs   | 113 (81 to 143.6)         | 147 (101.8 to 190)        | 79.4 (57.3 to 107.5)      | 83.2 (55.2 to 120.8)     | 119.7 (77.7 to 172.3)  | 52.6 (32.4 to 80.4)    | -26.4 (-46 to -3.5)       | -18.6 (-41.1 to 10)         | -33.8 (-53.1 to -7.2)     |
|                            |                                      | YLLs    | 105.2 (75.5 to 134.4)     | 135.3 (92.1 to 176.2)     | 75.3 (54.2 to 102.7)      | 74.9 (48.5 to 110.3)     | 106.5 (67.7 to 157.1)  | 48.6 (29 to 75.9)      | -28.8 (-49.5 to -4.2)     | -21.3 (-45.1 to 9.3)        | -35.4 (-55.5 to -8)       |
|                            |                                      | YLDs    | 7.8 (5 to 10.9)           | 11.7 (7.5 to 16.3)        | 4.1 (2.6 to 5.6)          | 8.3 (5.4 to 11.5)        | 13.2 (8.6 to 18.4)     | 3.9 (2.5 to 5.5)       | 5.3 (-3.1 to 14.5)        | 12.9 (2.6 to 24.7)          | -3.5 (-15.6 to 10)        |
|                            | Smoking                              | Deaths  | 10.4 (8.5 to 14)          | 1.1 (0.8 to 1.6)          | 19.7 (16 to 26.7)         | 10.2 (6.9 to 15.2)       | 1.2 (0.7 to 1.8)       | 17.4 (11.6 to 26)      | -1.7 (-30.9 to 35.3)      | 3.6 (-38.5 to 64.5)         | -11.8 (-38.2 to 22.8)     |
|                            |                                      | DALYs   | 289.2 (242.3 to 374.7)    | 29.4 (20 to 42.4)         | 547.6 (454.9 to 714.5)    | 282.2 (202.3 to 403.2)   | 30.1 (19.4 to 44.8)    | 497.4 (350.3 to 716.2) | -2.4 (-28.3 to 32.1)      | 2.4 (-36.7 to 59.6)         | -9.2 (-33.8 to 23.5)      |
|                            |                                      | YLLs    | 261.4 (216.1 to 348.8)    | 25.6 (17.1 to 36.9)       | 495.9 (407.4 to 663.5)    | 244.5 (165.8 to 364.5)   | 25 (15.4 to 38.4)      | 431.7 (288.4 to 650.1) | -6.5 (-34.4 to 31.6)      | -2.2 (-42 to 59)            | -12.9 (-39.7 to 23.1)     |
|                            |                                      | YLDs    | 27.8 (19.8 to 35.9)       | 3.8 (2.4 to 5.6)          | 51.7 (36.6 to 67.5)       | 37.7 (26.8 to 48.1)      | 5 (3.3 to 7.4)         | 65.6 (46.4 to 84.7)    | 35.6 (22.6 to 50)         | 33.6 (-6 to 95.7)           | 27 (14.9 to 40.7)         |
| Iran (Islamic Republic of) | All risk factors                     | Deaths  | 97 (80.7 to 111.5)        | 95.4 (76.2 to 111.6)      | 97.2 (82.1 to 112.5)      | 54.7 (47.4 to 61.1)      | 56 (47.8 to 63.5)      | 53.7 (46.6 to 60)      | -43.6 (-49.3 to -33.2)    | -41.3 (-48.2 to -26.3)      | -44.8 (-53.1 to -35.5)    |
|                            |                                      | DALYs   | 1911.6 (1660.7 to 2129.8) | 1859.3 (1578.8 to 2094.4) | 1944.9 (1683.9 to 2197.4) | 1072.1 (972.6 to 1165.2) | 1058.3 (935.1 to 1166) | 1088.5 (992 to 1187.8) | -43.9 (-49.4 to -35.4)    | -43.1 (-49.2 to -31.6)      | -44 (-51.2 to -35.5)      |
|                            |                                      | YLLs    | 1725.3 (1487.2 to 1941)   | 1641.7 (1371.4 to 1864.8) | 1788.7 (1539 to 2046.3)   | 905.8 (819.4 to 984)     | 868.2 (766.8 to 959.1) | 946 (855.1 to 1033.2)  | -47.5 (-53.4 to -38.7)    | -47.1 (-53.4 to -34.8)      | -47.1 (-54.6 to -38.2)    |
|                            |                                      | YLDs    | 186.3 (133.9 to 241.9)    | 217.6 (155.9 to 280.2)    | 156.2 (111.1 to 204.2)    | 166.3 (118.7 to 213.7)   | 190.1 (136.4 to 245.1) | 142.6 (101 to 185.2)   | -10.7 (-14.1 to -7.4)     | -12.6 (-16.1 to -8.7)       | -8.7 (-13 to -4.4)        |
|                            | Alcohol use                          | Deaths  | 0.1 (0 to 0.2)            | 0 (0 to 0)                | 0.1 (0 to 0.3)            | 0.2 (0.1 to 0.3)         | 0.1 (0 to 0.1)         | 0.4 (0.2 to 0.6)       | 251.4 (-2312.6 to 2759.2) | -841.6 (-4114.3 to 3814.2)  | 201 (-788.8 to 2447.6)    |
|                            |                                      | DALYs   | 2.2 (0 to 4.8)            | 0 (-0.6 to 0.9)           | 4.1 (0.4 to 8.6)          | 6.4 (3.9 to 9.3)         | 1.3 (0.1 to 2.7)       | 11.5 (7 to 16.9)       | 197.8 (20 to 2297.6)      | 3217.1 (-7312.1 to 4765.7)  | 180 (39.2 to 1514.9)      |
|                            |                                      | YLLs    | 2 (0.1 to 4.4)            | 0.1 (-0.5 to 0.8)         | 3.8 (0.4 to 8)            | 5.6 (3.4 to 8.1)         | 1.1 (0.2 to 2.2)       | 10.1 (6.2 to 14.7)     | 177.5 (13.7 to 1887.5)    | 1833.3 (-5279.6 to 5155.7)  | 163.2 (31.6 to 1255.6)    |
|                            |                                      | YLDs    | 0.1 (0 to 0.4)            | 0 (-0.1 to 0.1)           | 0.3 (0 to 0.7)            | 0.8 (0.4 to 1.4)         | 0.2 (0 to 0.5)         | 1.5 (0.7 to 2.4)       | 483.4 (-3407.7 to 4949.8) | -1293.2 (-7172.6 to 8407.7) | 401.3 (-1968.7 to 4439.8) |
|                            | Ambient particulate matter pollution | Deaths  | 23.6 (18.7 to 29.2)       | 22.4 (17.1 to 28.2)       | 24.6 (18.8 to 30.6)       | 14.5 (12.3 to 16.8)      | 14.5 (12 to 16.8)      | 14.6 (12.3 to 17)      | -38.6 (-47 to -24.6)      | -35.3 (-45.4 to -16.7)      | -40.7 (-50.8 to -26.2)    |
|                            |                                      | DALYs   | 520.8 (418.5 to 632.7)    | 490.6 (383.1 to 604.4)    | 546.2 (434.9 to 673.5)    | 325 (280.7 to 372.7)     | 315.1 (267.7 to 362.8) | 335.4 (288.4 to 384.9) | -37.6 (-46 to -24.3)      | -35.8 (-45.4 to -20.5)      | -38.6 (-48.6 to -24)      |
|                            |                                      | YLLs    | 466.2 (374.2 to 571.1)    | 428 (333.6 to 535.3)      | 499.2 (393.4 to 619.1)    | 270.5 (233.7 to 309.8)   | 252.8 (214.9 to 290.3) | 288.6 (247.2 to 331.9) | -42 (-50.1 to -28.9)      | -40.9 (-50.3 to -25.1)      | -42.2 (-52.6 to -28.1)    |
|                            |                                      | YLDs    | 54.6 (37.5 to 72.8)       | 62.6 (43 to 83.6)         | 46.9 (32 to 62.6)         | 54.6 (38.3 to 71.8)      | 62.3 (43.8 to 81.9)    | 46.9 (32.8 to 61.9)    | -0.1 (-8.8 to 14.4)       | -0.6 (-10.3 to 16.1)        | -0.2 (-8.6 to 13)         |
|                            | Diet high in red meat                | Deaths  | 3.6 (1.3 to 5.6)          | 3.5 (1.2 to 5.5)          | 3.7 (1.4 to 5.7)          | 1.6 (0.6 to 2.6)         | 1.6 (0.5 to 2.6)       | 1.7 (0.6 to 2.7)       | -54.7 (-64 to -45.7)      | -53.8 (-65.1 to -41.5)      | -54.9 (-65.6 to -44.9)    |
|                            |                                      | DALYs   | 91.4 (35.5 to 138.2)      | 88.4 (33.9 to 134.4)      | 93.6 (37.3 to 143.3)      | 40.9 (14.1 to 63.5)      | 38.9 (12.5 to 61)      | 42.9 (15.4 to 66.6)    | -55.3 (-64.5 to -47.5)    | -56 (-66.7 to -47.2)        | -54.2 (-64.5 to -45.4)    |
|                            |                                      | YLLs    | 80.9 (32.2 to 123.2)      | 76 (29.1 to 115.8)        | 85 (34.6 to 130)          | 33.4 (12 to 51.8)        | 30.4 (10.5 to 47.8)    | 36.5 (13.5 to 56.8)    | -58.7 (-67.5 to -50.9)    | -60.1 (-69.9 to -50.7)      | -57.1 (-67.5 to -48.1)    |
|                            |                                      | YLDs    | 10.5 (3.2 to 17.5)        | 12.4 (3.7 to 20.6)        | 8.6 (2.6 to 14.5)         | 7.5 (2.1 to 12.6)        | 8.5 (2.4 to 14.5)      | 6.4 (1.8 to 11.1)      | -28.5 (-39.6 to -21.5)    | -31.2 (-43.3 to -22.6)      | -25.4 (-38.3 to -16.2)    |
|                            | Diet high in sodium                  | Deaths  | 2 (0.4 to 7.5)            | 1.3 (0.4 to 5.2)          | 2.6 (0.3 to 10)           | 1 (0.2 to 4.1)           | 0.7 (0.2 to 2.8)       | 1.4 (0.2 to 5.2)       | -47.1 (-60.5 to -27.2)    | -46.2 (-61.8 to -23.6)      | -47.3 (-63.1 to -14.7)    |
|                            |                                      | DALYs   | 44.7 (7.2 to 170.3)       | 29.1 (7.9 to 116.2)       | 59.2 (5.6 to 224.9)       | 23.9 (4.1 to 93.4)       | 15.5 (4.4 to 64)       | 32.4 (3.4 to 122.4)    | -46.5 (-59.5 to -25.2)    | -46.7 (-61.5 to -25.9)      | -45.2 (-61.5 to -10.5)    |
|                            |                                      | YLLs    | 40.4 (6.5 to 153.6)       | 25.5 (7.1 to 103)         | 54.2 (5.2 to 205.8)       | 20.2 (3.5 to 78.3)       | 12.5 (3.6 to 51.4)     | 27.9 (3 to 105.4)      | -50 (-62.4 to -29.3)      | -50.9 (-65 to -30.2)        | -48.5 (-64.4 to -15.9)    |
|                            |                                      | YLDs    | 4.3 (0.6 to 17.1)         | 3.6 (0.8 to 14.6)         | 5 (0.4 to 19.5)           | 3.7 (0.6 to 14.5)        | 3 (0.7 to 12.3)        | 4.5 (0.4 to 16.8)      | -13.5 (-30.8 to 14)       | -16.8 (-38.1 to 9.5)        | -9.9 (-33.4 to 46.9)      |
|                            | Diet low in fiber                    | Deaths  | 2.8 (0.7 to 5.4)          | 2.7 (0.6 to 5.3)          | 2.9 (0.7 to 5.4)          | 0.9 (0.2 to 1.7)         | 0.9 (0.2 to 1.8)       | 0.9 (0.2 to 1.7)       | -69.1 (-76.2 to -58.6)    | -68.5 (-78.6 to -53.8)      | -69.1 (-78.3 to -57.4)    |
|                            |                                      | DALYs   | 62.4 (14 to 120.4)        | 60.5 (13.1 to 118.4)      | 63.7 (14.4 to 121.5)      | 18.1 (4.6 to 36.7)       | 17.1 (4.3 to 35.3)     | 19.1 (5 to 38.4)       | -71 (-76.7 to -63.1)      | -71.7 (-79.1 to -61.6)      | -70.1 (-77.7 to -60.4)    |
|                            |                                      | YLLs    | 55.6 (12.3 to 106.7)      | 52.5 (11.3 to 103)        | 58.1 (13.1 to 111.4)      | 15 (3.9 to 30.5)         | 13.7 (3.5 to 28.6)     | 16.4 (4.2 to 33.1)     | -73 (-78.3 to -64.8)      | -73.9 (-80.9 to -63.7)      | -71.8 (-79.3 to -62.4)    |
|                            |                                      | YLDs    | 6.8 (1.4 to 13.6)         | 8 (1.6 to 16.1)           | 5.6 (1.2 to 11.2)         | 3 (0.7 to 6.4)           | 3.4 (0.8 to 7.3)       | 2.7 (0.6 to 5.7)       | -55.2 (-62.8 to -46.1)    | -57.2 (-66.7 to -46.4)      | -52.4 (-62.1 to -41)      |
|                            | Diet low in fruits                   | Deaths  | 2.4 (1.1 to 4.2)          | 2.5 (1.1 to 4.3)          | 2.3 (1 to 4)              | 0.9 (0.4 to 1.5)         | 0.9 (0.4 to 1.6)       | 0.8 (0.4 to 1.5)       | -64.2 (-73.8 to -52.7)    | -63 (-75.8 to -47.2)        | -64.7 (-75.5 to -50.7)    |
|                            |                                      | DALYs   | 58.4 (26.8 to 96.9)       | 59.8 (27.2 to 98.4)       | 56.6 (26.3 to 93.4)       | 21.7 (9.8 to 35.7)       | 22.1 (9.9 to 36.9)     | 21.3 (9.8 to 35.8)     | -62.9 (-71.1 to -54)      | -63.1 (-73.8 to -51.7)      | -62.5 (-72.6 to -51.2)    |
|                            |                                      | YLLs    | 52.2 (24.2 to 85.1)       | 52.2 (24.4 to 85.4)       | 51.8 (24 to 84.5)         | 17.8 (8.3 to 29.1)       | 17.4 (8.1 to 28.6)     | 18.2 (8.5 to 30.7)     | -65.9 (-73.6 to -57.2)    | -66.7 (-76.9 to -55.7)      | -64.8 (-74.3 to -53.7)    |
|                            |                                      | YLDs    | 6.2 (2.1 to 11.5)         | 7.7 (2.6 to 14.4)         | 4.8 (1.7 to 8.9)          | 3.9 (1.4 to 7)           | 4.7 (1.6 to 8.9)       | 3 (1.1 to 5.6)         | -37.9 (-47.6 to -26.4)    | -38.8 (-51.7 to -25.2)      | -36.8 (-51.2 to -22.2)    |
|                            | Diet low in vegetables               | Deaths  | 2.4 (0.8 to 4.1)          | 2.2 (0.8 to 4)            | 2.5 (0.8 to 4.3)          | 0.5 (0.2 to 0.8)         | 0.5 (0.2 to 0.8)       | 0.5 (0.2 to 0.9)       | -80.8 (-87.6 to -69.1)    | -79.9 (-88.2 to -67.4)      | -81.3 (-88.3 to -69.7)    |
|                            |                                      | DALYs   | 52.8 (16.6 to 92.9)       | 49.7 (15.3 to 87.2)       | 55.4 (17.7 to 98.4)       | 7.5 (2.9 to 14.1)        | 7.1 (2.8 to 13.2)      | 8 (3 to 15.3)          | -85.7 (-90.8 to -75.5)    | -85.8 (-91.2 to -74.2)      | -85.5 (-91.1 to -75.4)    |
|                            |                                      | YLLs    | 47.4 (15.2 to 84.2)       | 43.5 (14 to 76.5)         | 50.8 (16.4 to 90.4)       | 6.5 (2.5 to 12)          | 5.9 (2.4 to 11)        | 7.1 (2.6 to 13.5)      | -86.3 (-91.3 to -76.5)    | -86.4 (-91.7 to -75.5)      | -86.1 (-91.4 to -76.4)    |
|                            |                                      | YLDs    | 5.4 (1.3 to 10)           | 6.2 (1.4 to 11.5)         | 4.6 (1.1 to 8.7)          | 1.1 (0.4 to 2.1)         | 1.1 (0.5 to 2.3)       | 1 (0.4 to 2)           | -80.2 (-87 to -64.6)      | -81.4 (-88.4 to -64.6)      | -78.7 (-86.9 to -61.9)    |
|                            | Diet low in whole grains             | Deaths  | 8.2 (4.8 to 10.8)         | 8.1 (4.8 to 10.8)         | 8.1 (4.6 to 10.7)         | 4.7 (2.9 to 5.9)         | 4.8 (2.9 to 6.2)       | 4.6 (2.8 to 5.8)       | -42.8 (-49.8 to -32.4)    | -40.5 (-47.7 to -25.1)      | -43.6 (-52 to -34.9)      |
|                            |                                      | DALYs   | 163.6 (88.9 to 214.7)     | 161.6 (88.7 to 213.7)     | 163.9 (88.7 to 217.4)     | 94.2 (53 to 120.6)       | 94 (53.3 to 121.3)     | 94.7 (52.8 to 122)     | -42.4 (-47.9 to -34.4)    | -41.8 (-48 to -30.3)        | -42.3 (-50.1 to -34.2)    |
|                            |                                      | YLLs    | 143.6 (78.4 to 189)       | 137.8 (77 to 184.2)       | 147.6 (80.1 to 196.3)     | 76.7 (44 to 98.2)        | 73.9 (42.6 to 95.2)    | 79.7 (45.1 to 102.2)   | -46.6 (-52.9 to -38.1)    | -46.4 (-53.3 to -33.1)      | -46 (-54.4 to -37.5)      |
|                            |                                      | YLDs    | 20 (10.3 to 29.3)         | 23.8 (12.3 to 34.7)       | 16.4 (8.4 to 24.3)        | 17.5 (9.1 to 25.6)       | 20.1 (10.5 to 29)      | 15 (7.8 to 22)         | -12.4 (-15.4 to -9.2)     | -15.6 (-18.8 to -12.1)      | -8.4 (-12.7 to -3.6)      |
|                            | High body-mass index                 | Deaths  | 15.5 (8.9 to 23.1)        | 17.8 (10.7 to 26)         | 13.3 (6.9 to 21)          | 11.8 (7.7 to 16.4)       | 12.1 (7.9 to 16.9)     | 11.4 (7.3 to 16)       | -24.2 (-38.7 to -0.5)     | -31.9 (-46.6 to -9.7)       | -14 (-33.6 to 27.2)       |
|                            |                                      | DALYs   | 457.9 (282.9 to 645.9)    | 531.6 (341.4 to 733.6)    | 389.3 (215.5 to 592.9)    | 353.2 (248.5 to 462.5)   | 355.7 (255.4 to 465)   | 350.3 (238 to 468.2)   | -22.9 (-37.2 to 0.4)      | -33.1 (-45.5 to -15.6)      | -10 (-29.8 to 32.9)       |
|                            |                                      | YLLs    | 404.2 (247.9 to 576.8)    | 457.8 (295.9 to 636.6)    | 354 (196.6 to 541.3)      | 287.2 (202.7 to 375.3)   | 276.1 (198.7 to 360.2) | 297.9 (205.1 to 396.9) | -28.9 (-42.7 to -7.1)     | -39.7 (-51.7 to -22.3)      | -15.8 (-35.1 to 24.4)     |
|                            |                                      | YLDs    | 53.7 (30.9 to 82.4)       | 73.8 (44.3 to 111.4)      | 35.3 (18.3 to 57.1)       | 66 (42.1 to 94.5)        | 79.6 (50.9 to 112.3)   | 52.3 (31.9 to 76.6)    | 22.7 (7 to 50.5)          | 7.8 (-5 to 29.8)            | 48.1 (22.3 to 113.7)      |
|                            | High fasting                         | Deaths  | 18.2 (10.2 to 34.4)       | 17.7 (9.7 to 34.8)        | 18.4 (10.7 to 33.4)       | 19.1 (10.3 to 38.3)      | 20.4 (10.5 to 41.6)    | 18 (9.8 to 35.2)       | 5.1 (-15.3 to 30.3)       | 14.8 (-10.3 to 48.9)        | -2 (-21.5 to 23.7)        |

| Location                   | Risk factor                              | Measure                   | 1990                      |                           |                           | 2019                      |                           |                          | % Change (1990 to 2019) |                           |                         |
|----------------------------|------------------------------------------|---------------------------|---------------------------|---------------------------|---------------------------|---------------------------|---------------------------|--------------------------|-------------------------|---------------------------|-------------------------|
|                            |                                          |                           | Both                      | Female                    | Male                      | Both                      | Female                    | Male                     | Both                    | Female                    | Male                    |
| World                      | plasma glucose                           | DALYs                     | 333.2 (209.5 to 554.1)    | 319.9 (197.5 to 548.8)    | 342.5 (212.1 to 543.1)    | 352.2 (207.7 to 596.8)    | 366.1 (208.6 to 639.3)    | 339.2 (207.9 to 558.6)   | 5.7 (-13.3 to 29.2)     | 14.5 (-10.4 to 47.7)      | -1 (-20.5 to 23.1)      |
|                            |                                          | YLLs                      | 301.5 (187.5 to 502.5)    | 283.8 (175.1 to 492.5)    | 315.2 (195 to 505.2)      | 299.6 (177.2 to 510)      | 304.3 (174.6 to 547.1)    | 295.9 (181.4 to 495.2)   | -0.6 (-19.4 to 23.4)    | 7.2 (-17 to 41)           | -6.1 (-25.8 to 18.6)    |
|                            |                                          | YLDs                      | 31.7 (17.4 to 53.6)       | 36.2 (19.8 to 60.9)       | 27.3 (15.1 to 46.4)       | 52.6 (27.7 to 92)         | 61.9 (32.7 to 108.2)      | 43.2 (23.2 to 74.7)      | 66.2 (41.9 to 93.2)     | 71.1 (41.7 to 103.4)      | 58.7 (36.2 to 85.8)     |
|                            | High LDL cholesterol                     | Deaths                    | 20 (7.8 to 40.7)          | 20.5 (7.3 to 43.9)        | 19 (7.8 to 39.5)          | 11 (4 to 22.8)            | 11.7 (3.8 to 24.6)        | 10.4 (4.2 to 21.6)       | -44.9 (-53.4 to -35.6)  | -42.8 (-53.4 to -29.7)    | -45.4 (-54.2 to -36.9)  |
|                            |                                          | DALYs                     | 421.7 (247.9 to 713.2)    | 433.1 (249.8 to 733.7)    | 406.1 (241.8 to 663.2)    | 234.3 (135.1 to 399.7)    | 239.7 (131.7 to 415.8)    | 229.8 (135.9 to 377)     | -44.4 (-50.7 to -37.5)  | -44.6 (-51.8 to -35)      | -43.4 (-50.8 to -35.6)  |
|                            |                                          | YLLs                      | 366.2 (208.8 to 624.7)    | 364.5 (200 to 645.2)      | 363.1 (211.9 to 606.8)    | 187.5 (104.3 to 324.6)    | 184.5 (94.5 to 332.8)     | 191.2 (112.1 to 320.7)   | -48.8 (-55.5 to -41.3)  | -49.4 (-58.2 to -38.5)    | -47.3 (-55.3 to -38.9)  |
|                            | High systolic blood pressure             | YLDs                      | 55.5 (33.5 to 89.9)       | 68.6 (41.7 to 110.2)      | 43 (25.6 to 70.3)         | 46.9 (27.9 to 77.1)       | 55.2 (32.8 to 90.2)       | 38.6 (23 to 63.6)        | -15.6 (-18.5 to -12.5)  | -19.5 (-23.2 to -15.5)    | -10.2 (-14.7 to -5.4)   |
|                            |                                          | Deaths                    | 52.5 (40.4 to 66.3)       | 53.1 (40.1 to 68)         | 50.9 (38.4 to 64.2)       | 29.6 (23.5 to 36.4)       | 30.5 (23.5 to 38.3)       | 28.9 (22.8 to 35.2)      | -43.6 (-50.2 to -33)    | -42.5 (-50.5 to -27.6)    | -43.3 (-52.1 to -33.7)  |
|                            |                                          | DALYs                     | 1069 (854.1 to 1295.5)    | 1065 (842.5 to 1294.8)    | 1062.2 (833.7 to 1305.2)  | 612.9 (506.3 to 718.1)    | 606.4 (493.8 to 722.3)    | 620.4 (513 to 720.1)     | -42.7 (-48.8 to -33.6)  | -43.1 (-50.1 to -31.3)    | -41.6 (-50.1 to -32.6)  |
|                            | High temperature                         | YLLs                      | 964.5 (768.2 to 1171.1)   | 940.6 (741.6 to 1147.2)   | 976.5 (768.5 to 1200.7)   | 516.6 (426 to 603.6)      | 496.2 (403.6 to 592)      | 538.1 (443.3 to 632.2)   | -46.4 (-52.4 to -37.1)  | -47.2 (-54.3 to -34.5)    | -44.9 (-53.6 to -35.4)  |
|                            |                                          | YLDs                      | 104.5 (72.1 to 140.3)     | 124.4 (86.7 to 166.8)     | 85.6 (58.4 to 116.7)      | 96.2 (67.4 to 128.1)      | 110.1 (77.6 to 147.4)     | 82.2 (57.3 to 110.4)     | -7.9 (-12.1 to -3.3)    | -11.4 (-16.9 to -5.4)     | -4 (-9.2 to 2)          |
|                            |                                          | Deaths                    | 0.6 (-0.3 to 1.5)         | 0.6 (-0.3 to 1.5)         | 0.6 (-0.3 to 1.5)         | 0.5 (0.1 to 0.8)          | 0.5 (0.1 to 0.8)          | 0.5 (0.1 to 0.8)         | -25.3 (-349.5 to 245.7) | -23.5 (-321.9 to 246)     | -25.6 (-372.2 to 257.4) |
|                            | Household air pollution from solid fuels | YLLs                      | 10.4 (-4.6 to 26)         | 10 (-4.3 to 24.7)         | 10.8 (-4.8 to 27.1)       | 7.7 (1.6 to 14)           | 7.3 (1.6 to 13.3)         | 8.1 (1.7 to 14.9)        | -26.1 (-404.2 to 244)   | -26.4 (-293.6 to 261.4)   | -24.7 (-488.1 to 297.9) |
|                            |                                          | Deaths                    | 5 (2.4 to 8.7)            | 5.5 (2.6 to 9.4)          | 4.4 (2 to 8.1)            | 0 (0 to 0.1)              | 0 (0 to 0.1)              | 0 (0 to 0.1)             | -99.3 (-99.7 to -98.4)  | -99.3 (-99.7 to -98.4)    | -99.4 (-99.8 to -98.5)  |
|                            |                                          | DALYs                     | 109.4 (52.8 to 186.3)     | 121 (58.6 to 203.2)       | 97.2 (45.2 to 176.4)      | 0.8 (0.3 to 1.7)          | 0.9 (0.3 to 2)            | 0.7 (0.2 to 1.5)         | -99.3 (-99.7 to -98.3)  | -99.3 (-99.7 to -98.3)    | -99.3 (-99.7 to -98.4)  |
|                            | Kidney dysfunction                       | YLLs                      | 98.3 (47.6 to 172.2)      | 106.4 (51.6 to 180.9)     | 89.4 (41.3 to 163)        | 0.6 (0.2 to 1.4)          | 0.7 (0.3 to 1.6)          | 0.6 (0.2 to 1.3)         | -99.3 (-99.7 to -98.4)  | -99.3 (-99.7 to -98.4)    | -99.4 (-99.7 to -98.4)  |
|                            |                                          | YLDs                      | 11.1 (5.4 to 19.5)        | 14.6 (6.9 to 25)          | 7.8 (3.5 to 14.4)         | 0.1 (0 to 0.3)            | 0.2 (0.1 to 0.4)          | 0.1 (0 to 0.2)           | -98.9 (-99.5 to -97.4)  | -98.9 (-99.5 to -97.3)    | -99 (-99.6 to -97.5)    |
|                            |                                          | Deaths                    | 10.4 (6.9 to 14.2)        | 10.7 (6.6 to 15.3)        | 10 (6.7 to 13.1)          | 6.6 (4 to 9.1)            | 7 (3.8 to 10)             | 6.3 (4.1 to 8.5)         | -36.4 (-48.9 to -22.9)  | -34.8 (-49 to -15.2)      | -37.1 (-51.5 to -26)    |
|                            | Lead exposure                            | DALYs                     | 216.8 (163.6 to 275.8)    | 225.5 (163.3 to 294.1)    | 206.9 (155.4 to 259.5)    | 139.5 (105.2 to 173.9)    | 146.1 (103.9 to 186.2)    | 133 (102.1 to 163.5)     | -35.6 (-44.1 to -25)    | -35.2 (-44.3 to -20.3)    | -35.7 (-45.9 to -26.1)  |
|                            |                                          | YLLs                      | 193.9 (144.6 to 248.1)    | 197 (140.7 to 261.4)      | 189.2 (139.7 to 239.1)    | 116.5 (87.2 to 146.5)     | 118.5 (82.9 to 153.9)     | 114.7 (87 to 141.3)      | -39.9 (-49 to -28.4)    | -39.9 (-49.8 to -23.5)    | -39.4 (-49.8 to -29.2)  |
|                            |                                          | YLDs                      | 22.9 (14.9 to 31.1)       | 28.5 (18.7 to 38.5)       | 17.7 (11.5 to 24.2)       | 23 (15.2 to 31.4)         | 27.7 (18.3 to 37.9)       | 18.3 (11.9 to 24.8)      | 0.4 (-4.6 to 5.4)       | -2.8 (-8.4 to 2.9)        | 3.5 (-2.7 to 9.9)       |
|                            | Low physical activity                    | Deaths                    | 8.5 (5.7 to 11.9)         | 7 (4.3 to 10.2)           | 9.9 (6.7 to 13.7)         | 4.6 (3 to 6.4)            | 3.8 (2.3 to 5.6)          | 5.4 (3.7 to 7.4)         | -45.8 (-54 to -35.7)    | -45.2 (-53.9 to -29.9)    | -45.7 (-55 to -35)      |
|                            |                                          | DALYs                     | 187 (129.8 to 251.9)      | 147.9 (93.8 to 205.2)     | 223 (158 to 297.6)        | 87.5 (57.8 to 117.9)      | 68.6 (41.7 to 98.5)       | 106.5 (73.3 to 139.1)    | -53.2 (-60.6 to -45.7)  | -53.6 (-61.2 to -43.1)    | -52.2 (-60.9 to -43.9)  |
|                            |                                          | YLLs                      | 169.6 (116.9 to 227.2)    | 130.8 (83.7 to 180.6)     | 205.3 (143.7 to 272.9)    | 75.4 (50.1 to 101.3)      | 57.4 (35.2 to 82)         | 93.6 (64.3 to 122.8)     | -55.5 (-62.8 to -47.6)  | -56.1 (-63.7 to -45.1)    | -54.4 (-63 to -45.7)    |
|                            | Low temperature                          | YLDs                      | 17.5 (10.7 to 25.7)       | 17.2 (9.8 to 26)          | 17.7 (11.1 to 25.8)       | 12 (7 to 18.3)            | 11.2 (6.1 to 17.6)        | 12.9 (7.6 to 19.2)       | -31 (-38.8 to -24.8)    | -34.6 (-44.1 to -27)      | -27.2 (-35.5 to -20.1)  |
|                            |                                          | Deaths                    | 6.8 (1.4 to 15.7)         | 7.1 (1.5 to 15.8)         | 6.3 (1.1 to 15.1)         | 4.2 (0.9 to 9.4)          | 4.7 (1.1 to 10.3)         | 3.7 (0.6 to 8.8)         | -38.9 (-47.4 to -25.6)  | -34.4 (-43.8 to -14)      | -41.7 (-51.1 to -31.4)  |
|                            |                                          | DALYs                     | 104.4 (19.7 to 255.9)     | 109.5 (23.3 to 255.2)     | 97.9 (16 to 256.1)        | 63.4 (12 to 154.7)        | 70.1 (15.1 to 163.5)      | 57.1 (9.2 to 146.1)      | -39.3 (-47.1 to -27.3)  | -36.1 (-44.7 to -18.5)    | -41.6 (-49.7 to -31.9)  |
| Secondhand smoke           | YLLs                                     | 93.5 (17.9 to 230.4)      | 96.2 (20.9 to 224.2)      | 89.5 (14.7 to 234.1)      | 53.5 (10.5 to 129.9)      | 57.9 (12.6 to 134.4)      | 49.5 (8 to 126.2)         | -42.8 (-51.6 to -29.7)   | -39.8 (-49.2 to -21.1)  | -44.7 (-52.9 to -34.5)    |                         |
|                            | YLDs                                     | 10.9 (1.8 to 28.9)        | 13.3 (2.3 to 34.5)        | 8.4 (1.2 to 23.3)         | 9.9 (1.6 to 25.9)         | 12.1 (2.2 to 30.2)        | 7.6 (1.1 to 20.7)         | -9.1 (-14.2 to -0.6)     | -9 (-16.4 to 2.4)       | -9.1 (-14.9 to -1.2)      |                         |
|                            | Deaths                                   | 10.6 (7.7 to 13.9)        | 10.5 (7.5 to 13.9)        | 10.6 (7.6 to 13.8)        | 6 (4.5 to 7.6)            | 6.2 (4.6 to 7.9)          | 5.8 (4.4 to 7.4)          | -43.7 (-50.7 to -32.4)   | -41.3 (-48.8 to -25.5)  | -45 (-53 to -34.8)        |                         |
| Smoking                    | YLLs                                     | 185.4 (136.3 to 239.6)    | 177.9 (127.7 to 234.4)    | 191 (141.3 to 245.9)      | 95.6 (71.6 to 120.4)      | 92.5 (69.3 to 117.7)      | 99.1 (75 to 124.9)        | -48.4 (-54.9 to -39.3)   | -48 (-54.9 to -36.4)    | -48.1 (-55.9 to -38.6)    |                         |
|                            | Deaths                                   | 3.6 (2.6 to 4.8)          | 3.8 (2.7 to 5.2)          | 3.4 (2.4 to 4.5)          | 1.9 (1.4 to 2.4)          | 2.1 (1.5 to 2.7)          | 1.7 (1.2 to 2.3)          | -47.6 (-55.8 to -36.9)   | -45.7 (-55.1 to -31.5)  | -49.2 (-60 to -36.3)      |                         |
|                            | DALYs                                    | 83 (59.5 to 108.5)        | 92.4 (66.2 to 120.7)      | 73.8 (51.5 to 98.8)       | 43.2 (32.2 to 53.8)       | 48.4 (35.6 to 61.1)       | 38.1 (27.6 to 49.1)       | -48 (-55 to -38.8)       | -47.6 (-56 to -36.1)    | -48.4 (-58.7 to -36.8)    |                         |
| Ambient particulate matter | YLLs                                     | 77.3 (55.3 to 101.5)      | 84.6 (60.3 to 110.7)      | 70.1 (48.7 to 94.3)       | 38.2 (28.4 to 48)         | 41.7 (30.5 to 52.8)       | 34.8 (25.3 to 45)         | -50.6 (-57.9 to -41.3)   | -50.7 (-58.9 to -38.8)  | -50.3 (-60.5 to -38.5)    |                         |
|                            | YLDs                                     | 5.7 (3.7 to 8)            | 7.7 (4.9 to 11)           | 3.7 (2.4 to 5.4)          | 5 (3.2 to 6.9)            | 6.7 (4.3 to 9.3)          | 3.2 (2 to 4.6)            | -12.3 (-19.4 to -4.4)    | -13.3 (-21.5 to -4.2)   | -13 (-25.3 to 1.8)        |                         |
|                            | Deaths                                   | 12.2 (10.1 to 14.4)       | 4.7 (3.3 to 6.5)          | 19.5 (16 to 23.1)         | 5.2 (4.6 to 5.9)          | 2 (1.5 to 2.5)            | 8.5 (7.4 to 9.7)          | -56.8 (-64.3 to -47.5)   | -58.6 (-72 to -38.3)    | -56.3 (-64.1 to -46.8)    |                         |
| All risk factors           | DALYs                                    | 324.3 (276.6 to 378.9)    | 133.9 (95 to 185.4)       | 502.7 (427.3 to 592.9)    | 145.3 (129.3 to 161.8)    | 58.1 (45.2 to 73.5)       | 232.9 (206.4 to 260.1)    | -55.2 (-62.8 to -46.8)   | -56.6 (-69.5 to -39.1)  | -53.7 (-61.2 to -44.8)    |                         |
|                            | YLLs                                     | 292.8 (247.7 to 345.6)    | 115.7 (81.7 to 158.1)     | 458.6 (387 to 545.8)      | 121.9 (109.2 to 135.8)    | 45.3 (35.4 to 58.4)       | 198.8 (176.2 to 223.3)    | -58.4 (-65.4 to -49.8)   | -60.8 (-72.9 to -44.4)  | -56.7 (-64.4 to -47.7)    |                         |
|                            | YLDs                                     | 31.6 (21.9 to 41.6)       | 18.2 (11.4 to 26.6)       | 44.1 (30.9 to 58)         | 23.4 (16.6 to 30.5)       | 12.8 (8.6 to 17.6)        | 34.1 (23.7 to 44.6)       | -25.8 (-33.6 to -17)     | -29.7 (-48.3 to -4.6)   | -22.6 (-29.5 to -15.1)    |                         |
| All risk factors           | Deaths                                   | 143.5 (121.1 to 168.9)    | 136.7 (111.1 to 165.7)    | 149.8 (118.7 to 187.4)    | 127 (104.4 to 149.1)      | 114.3 (92.8 to 135.4)     | 140.3 (113.7 to 164.7)    | -11.4 (-29.7 to 8.2)     | -16.4 (-34.9 to 5.4)    | -6.4 (-28.4 to 20.5)      |                         |
|                            | DALYs                                    | 3169.9 (2706.7 to 3706)   | 2992 (2486 to 3536.8)     | 3346.1 (2664.8 to 4174.9) | 2640.3 (2134.7 to 3137.5) | 2359.3 (1924.9 to 2808.6) | 2925.9 (2324.1 to 3540.4) | -16.7 (-33.9 to 3.1)     | -21.1 (-38.9 to -0.5)   | -12.6 (-33.6 to 14.1)     |                         |
|                            | YLLs                                     | 2875.3 (2425.1 to 3419.1) | 2652.8 (2132.8 to 3210.6) | 3097.7 (2430 to 3915.7)   | 2366.2 (1878.2 to 2871.8) | 2044.2 (1624.3 to 2480.1) | 2695.6 (2129.4 to 3291.8) | -17.7 (-36.7 to 4.2)     | -22.9 (-42.6 to 0.7)    | -13 (-35.5 to 16.1)       |                         |
|                            | YLDs                                     | 294.6 (217.8 to 373.9)    | 339.2 (251.9 to 429.2)    | 248.4 (181.3 to 317.3)    | 274.1 (200.1 to 345)      | 315.1 (229 to 398.6)      | 230.3 (166.1 to 290.8)    | -7 (-11.9 to -1.5)       | -7.1 (-14 to 0.4)       | -7.3 (-14.3 to 0.3)       |                         |
|                            | Alcohol use                              | Deaths                    | 1.5 (0.7 to 2.5)          | 0 (-0.4 to 0.5)           | 3 (1.5 to 4.9)            | 0.3 (-0.1 to 0.8)         | -0.2 (-0.4 to 0)          | 0.8 (0 to 1.7)           | -81.7 (-113.6 to -48.9) | -812 (-1450.4 to 1243.1)  | -75.1 (-101.8 to -44.4) |
|                            |                                          | DALYs                     | 49.6 (26.1 to 81)         | 4 (-6 to 15.7)            | 95.6 (51.8 to 153.5)      | 12 (-0.7 to 26.6)         | -3.2 (-7.6 to 1.8)        | 27.1 (3.8 to 55.7)       | -75.8 (-102.8 to -44.8) | -179.9 (-988.8 to 1007.9) | -71.6 (-94.9 to -41.4)  |
|                            |                                          | YLLs                      | 47.3 (25 to 76.5)         | 4.4 (-4.8 to 15.4)        | 90.4 (48.7 to 146)        | 11.7 (-0.1 to 25.3)       | -2.4 (-6.3 to 1.9)        | 25.7 (3.9 to 52.3)       | -75.3 (-100.4 to -44.5) | -154.6 (-1082.6 to 572.5) | -71.6 (-94.6 to -40.7)  |
|                            | Ambient particulate matter               | YLDs                      | 2.4 (0.7 to 4.4)          | -0.4 (-1.5 to 0.8)        | 5.2 (2.2 to 8.7)          | 0.3 (-0.6 to 1.5)         | -0.8 (-1.5 to -0.1)       | 1.5 (-0.3 to 3.5)        | -85.7 (-157.3 to -44.6) | 91.5 (-1366.2 to 1088.6)  | -71.9 (-108.8 to -38.1) |
|                            |                                          | Deaths                    | 36.7 (24.1 to 49.4)       | 32.8 (20.7 to 45.5)       | 40.8 (27.6 to 56.7)       | 39.1 (29.6 to 49.4)       | 34.9 (26 to 44.2)         | 43.6 (32.8 to 54.8)      | 6.6 (-21.2 to 48)       | 6.3 (-23.7 to 56.5)       | 6.8 (-22 to 53.2)       |
|                            |                                          | DALYs                     | 899.1 (601.9 to 1215.4)   | 798 (507.2 to 1102.4)     | 1001.7 (683.1 to 1402.2)  | 915.6 (686.5 to 1176)     | 816.7 (613.4 to 1045)     | 1015.4 (749.2 to 1292.4) | 1.8 (-25.7 to 44.6)     | 2.3 (-27.2 to 50.8)       | 1.4 (-28 to 47.4)       |

| Location                                 | Risk factor | Measure | 1990                    |                           |                           | 2019                      |                           |                           | % Change (1990 to 2019)  |                        |                        |
|------------------------------------------|-------------|---------|-------------------------|---------------------------|---------------------------|---------------------------|---------------------------|---------------------------|--------------------------|------------------------|------------------------|
|                                          |             |         | Both                    | Female                    | Male                      | Both                      | Female                    | Male                      | Both                     | Female                 | Male                   |
| pollution                                | YLLs        | YLLs    | 813.9 (537.6 to 1106.4) | 704.1 (446.4 to 986.4)    | 925.3 (619.8 to 1284.6)   | 815.7 (595.9 to 1055.5)   | 701.7 (512.8 to 917.4)    | 931.2 (674.8 to 1196)     | 0.2 (-28.4 to 43.7)      | -0.3 (-31.4 to 49.7)   | 0.6 (-29.8 to 48.8)    |
|                                          |             |         | YLDs                    | 85.3 (52.7 to 121.5)      | 93.9 (56.3 to 135.5)      | 76.4 (48.2 to 108.1)      | 99.9 (67.6 to 130.5)      | 115 (78.6 to 152.3)       | 84.1 (57 to 111.5)       | 17.2 (-2.9 to 57)      | 22.4 (-2.6 to 69.3)    |
| Diet high in red meat                    | Deaths      | Deaths  | 3.2 (1 to 5.4)          | 3 (1 to 5.1)              | 3.4 (1.1 to 5.9)          | 1.9 (0.6 to 3.4)          | 1.7 (0.6 to 3)            | 2.1 (0.7 to 3.8)          | -40.5 (-58.1 to -20.7)   | -43.8 (-62.8 to -19.6) | -37.5 (-57.2 to -12.5) |
|                                          |             |         | DALYs                   | 87.8 (27.6 to 148.1)      | 82.4 (26.2 to 137.6)      | 93.1 (29.2 to 159.7)      | 48.3 (15 to 87.2)         | 42.9 (13.3 to 77.5)       | 53.7 (16.7 to 97.3)      | -45 (-61.2 to -25.5)   | -47.9 (-65.1 to -24.8) |
|                                          | YLLs        | YLLs    | 79.1 (24.8 to 133.5)    | 72.3 (22 to 123.1)        | 85.9 (26.2 to 148.5)      | 42.8 (13.2 to 78.8)       | 36.6 (11.3 to 67)         | 49.1 (15.3 to 90)         | -45.8 (-62.6 to -24.9)   | -49.4 (-66.9 to -25)   | -42.9 (-61.8 to -17.2) |
|                                          |             |         | YLDs                    | 8.6 (2.4 to 15.2)         | 10 (2.8 to 17.7)          | 7.3 (2.1 to 12.7)         | 5.5 (1.5 to 10.1)         | 6.3 (1.7 to 11.7)         | 4.6 (1.3 to 8.5)         | -36.9 (-48.3 to -23.1) | -37.6 (-50.6 to -22.3) |
| Diet high in sodium                      | Deaths      | Deaths  | 3 (0.4 to 12.4)         | 2 (0.4 to 8.2)            | 4.1 (0.3 to 17.5)         | 2.6 (0.4 to 10.1)         | 1.5 (0.3 to 6.4)          | 3.7 (0.3 to 14.9)         | -14.7 (-47.8 to 64.8)    | -22.8 (-61.4 to 90.1)  | -10 (-48.3 to 89.9)    |
|                                          |             |         | DALYs                   | 75.6 (8.6 to 312.5)       | 48.2 (8.3 to 201.8)       | 103.7 (7.1 to 432.3)      | 61.9 (7.6 to 244.6)       | 35.7 (6.8 to 148.5)       | 88.9 (6.6 to 346.7)      | -18.1 (-50.6 to 63)    | -26 (-65 to 80.6)      |
|                                          | YLLs        | YLLs    | 69 (7.8 to 287.6)       | 42.7 (7.3 to 179)         | 96.1 (6.5 to 403.3)       | 55.8 (6.7 to 220.8)       | 30.8 (5.9 to 129.5)       | 81.7 (6.1 to 320.4)       | -19.1 (-51.8 to 59)      | -28 (-65.9 to 78.1)    | -14.9 (-52.5 to 78.6)  |
|                                          |             |         | YLDs                    | 6.6 (0.8 to 26.9)         | 5.5 (0.9 to 22.9)         | 7.7 (0.5 to 30.6)         | 6 (0.7 to 24.3)           | 4.9 (0.8 to 20.7)         | 7.2 (0.5 to 27.7)        | -7.8 (-43.7 to 82.4)   | -10.7 (-58.3 to 104.5) |
| Diet low in fiber                        | Deaths      | Deaths  | 2.3 (0.5 to 4.9)        | 2.1 (0.5 to 4.7)          | 2.4 (0.6 to 5.3)          | 4.1 (0.8 to 7.9)          | 3.6 (0.7 to 7.1)          | 4.5 (0.9 to 8.9)          | 78.7 (24 to 158)         | 70.1 (11.1 to 157.5)   | 87.5 (28 to 179.1)     |
|                                          |             |         | DALYs                   | 52.5 (11.6 to 116.8)      | 48.2 (10.9 to 108.9)      | 56.6 (12.3 to 125.9)      | 97.8 (19.2 to 191.5)      | 87.3 (16.9 to 175.7)      | 108.4 (20.7 to 212.5)    | 86.4 (29.6 to 177.4)   | 81 (21.8 to 173.5)     |
|                                          | YLLs        | YLLs    | 47.2 (10.4 to 105.8)    | 42.2 (9.4 to 96.3)        | 52.1 (11.3 to 116.7)      | 86.4 (16.8 to 170.8)      | 74.1 (14.1 to 151.7)      | 98.7 (18.8 to 196.1)      | 83.1 (26 to 181.4)       | 75.6 (13.9 to 173.1)   | 89.6 (27.8 to 202.9)   |
|                                          |             |         | YLDs                    | 5.3 (1.1 to 11.7)         | 6 (1.3 to 13.6)           | 4.6 (1 to 10)             | 11.4 (2.3 to 22.9)        | 13.2 (2.5 to 26.4)        | 9.7 (1.9 to 19.4)        | 116.2 (66 to 185.6)    | 118.9 (63.4 to 202.1)  |
| Diet low in fruits                       | Deaths      | Deaths  | 7.2 (3.3 to 12.2)       | 7 (3.1 to 12)             | 7.4 (3.3 to 12.9)         | 7 (3 to 12.1)             | 6.3 (2.7 to 10.9)         | 7.8 (3.4 to 13.4)         | -2.2 (-30.3 to 33.7)     | -9.8 (-38.6 to 27.4)   | 5.5 (-27 to 54.3)      |
|                                          |             |         | DALYs                   | 190 (86.5 to 323.4)       | 182.8 (82.1 to 315.9)     | 196.9 (88.3 to 337.5)     | 180.1 (79.8 to 308.2)     | 160.7 (70.8 to 270.3)     | 199.3 (88.6 to 348.5)    | -5.2 (-32.5 to 35.7)   | -12.1 (-40.1 to 24.8)  |
|                                          | YLLs        | YLLs    | 172.7 (79.4 to 296.9)   | 162.3 (75.6 to 286.1)     | 182.7 (83.1 to 318.9)     | 160.8 (71.5 to 274.1)     | 138.6 (60.7 to 236.9)     | 183 (81.1 to 322.5)       | -6.9 (-35.6 to 35.2)     | -14.6 (-42.9 to 25.6)  | 0.2 (-32.4 to 52.5)    |
|                                          |             |         | YLDs                    | 17.3 (6 to 32.1)          | 20.4 (7 to 37.8)          | 14.2 (5.1 to 26.2)        | 19.3 (7.2 to 35.2)        | 22.2 (8.2 to 40.9)        | 16.3 (6.3 to 29.5)       | 11 (-6.5 to 54.1)      | 8.4 (-10.9 to 49.4)    |
| Diet low in vegetables                   | Deaths      | Deaths  | 1.7 (0.4 to 3.8)        | 1.5 (0.4 to 3.5)          | 1.9 (0.5 to 4.2)          | 1.3 (0.4 to 2.7)          | 1.1 (0.3 to 2.4)          | 1.5 (0.4 to 3)            | -24 (-47.2 to 10.4)      | -27.5 (-53.7 to 16.6)  | -20.4 (-47.4 to 25)    |
|                                          |             |         | DALYs                   | 37.3 (8.5 to 90.4)        | 32.8 (7.7 to 82.2)        | 41.9 (9.3 to 103)         | 25.2 (6.8 to 57.1)        | 20.9 (5.9 to 48.7)        | 29.5 (7.5 to 67.6)       | -32.6 (-52.6 to -0.8)  | -36.2 (-58.8 to 0.1)   |
|                                          | YLLs        | YLLs    | 33.8 (7.7 to 83.9)      | 28.9 (6.8 to 74.3)        | 38.6 (8.5 to 96.5)        | 22.5 (6.1 to 51.9)        | 18.1 (5 to 42.2)          | 27.1 (6.9 to 63.4)        | -33.3 (-53.8 to 1.3)     | -37.4 (-61 to 1.9)     | -29.9 (-53.9 to 11.8)  |
|                                          |             |         | YLDs                    | 3.6 (0.7 to 8)            | 3.9 (0.8 to 8.7)          | 3.2 (0.6 to 7.2)          | 2.6 (0.7 to 5.8)          | 2.8 (0.7 to 6.6)          | 2.4 (0.6 to 5.4)         | -26.2 (-40 to -5.9)    | -27 (-47.9 to -0.1)    |
| Diet low in whole grains                 | Deaths      | Deaths  | 7 (3.3 to 9.9)          | 6.8 (3.3 to 9.8)          | 7.1 (3.2 to 10.3)         | 6.1 (2.5 to 8.6)          | 5.6 (2.3 to 8)            | 6.5 (2.8 to 9.5)          | -13.1 (-32.6 to 7)       | -17.9 (-39.5 to 5.7)   | -7.6 (-31 to 20.6)     |
|                                          |             |         | DALYs                   | 152.8 (67.6 to 216.5)     | 150.1 (68.7 to 213.4)     | 155.3 (67.2 to 230.1)     | 125.3 (49.3 to 183.9)     | 118.7 (45.3 to 174.5)     | 132.2 (52 to 196.2)      | -18 (-36.3 to 2.2)     | -20.9 (-41.2 to -0.6)  |
|                                          | YLLs        | YLLs    | 130.2 (58.1 to 187.1)   | 123.1 (56.4 to 180.5)     | 137.2 (60.1 to 206.7)     | 106.3 (42.2 to 158.3)     | 96 (36.7 to 143.5)        | 117 (46.3 to 175.5)       | -18.4 (-39.3 to 4.8)     | -22 (-44.1 to 2.9)     | -14.7 (-39.1 to 17.4)  |
|                                          |             |         | YLDs                    | 22.6 (9.6 to 34.1)        | 27.1 (11.9 to 40.9)       | 18.1 (7.4 to 27.8)        | 19.1 (7.1 to 29.2)        | 22.7 (8.3 to 35.2)        | 15.2 (5.7 to 23.6)       | -15.8 (-28.2 to -9.1)  | -16 (-30 to -7.3)      |
| High body-mass index                     | Deaths      | Deaths  | 42.9 (25.8 to 60.7)     | 41.9 (26.3 to 58.7)       | 43.7 (23.6 to 66)         | 35.9 (22.3 to 51)         | 31.7 (20.1 to 45.6)       | 40 (24.2 to 57.7)         | -16.3 (-37 to 11.5)      | -24.3 (-44.7 to 3.8)   | -8.3 (-34.8 to 30.2)   |
|                                          |             |         | DALYs                   | 1314.6 (836.1 to 1795.1)  | 1283 (859.3 to 1725.7)    | 1343.6 (774.9 to 1976.9)  | 1056.1 (692.1 to 1471.5)  | 942.4 (629.6 to 1297.7)   | 1167.9 (746.4 to 1657.2) | -19.7 (-39.5 to 7.5)   | -26.5 (-45.5 to -0.2)  |
|                                          | YLLs        | YLLs    | 1191 (755.3 to 1637.6)  | 1134.8 (745.9 to 1556.8)  | 1245 (717.6 to 1857.3)    | 939.5 (602.3 to 1319.7)   | 807 (525 to 1129.3)       | 1070.3 (669.9 to 1539.3)  | -21.1 (-42.6 to 8.5)     | -28.9 (-49.7 to 0.1)   | -14 (-39.3 to 24.6)    |
|                                          |             |         | YLDs                    | 123.5 (73 to 180.5)       | 148.2 (89.9 to 211.4)     | 98.7 (55.2 to 147.4)      | 116.6 (73.1 to 165.9)     | 135.4 (85.9 to 191)       | 97.7 (59.8 to 142.2)     | -5.6 (-13.7 to 5.1)    | -8.7 (-16.4 to 1.5)    |
| High fasting plasma glucose              | Deaths      | Deaths  | 34 (21 to 56.6)         | 33.6 (20 to 58.3)         | 34.1 (20.5 to 57.1)       | 44.2 (27.5 to 72.3)       | 39.4 (23.8 to 65.4)       | 49 (29 to 81.1)           | 30 (-9.4 to 81.5)        | 17.4 (-22.8 to 77.5)   | 43.7 (-4.3 to 112.5)   |
|                                          |             |         | DALYs                   | 707.3 (469.3 to 1088.1)   | 693.1 (445.6 to 1086.5)   | 720.3 (453.9 to 1141.1)   | 884.4 (563.9 to 1343.1)   | 782.5 (498 to 1203.6)     | 988.7 (615.5 to 1511.8)  | 25 (-12.1 to 74.3)     | 12.9 (-24.9 to 66.5)   |
|                                          | YLLs        | YLLs    | 641.4 (423.7 to 998.8)  | 615.5 (390.3 to 972.5)    | 666.6 (419.1 to 1055.7)   | 794.6 (499.2 to 1199)     | 680.2 (424.6 to 1046.4)   | 912.4 (565.7 to 1409.4)   | 23.9 (-14.9 to 75.9)     | 10.5 (-27.8 to 65.7)   | 36.9 (-11.2 to 105.2)  |
|                                          |             |         | YLDs                    | 65.9 (38.9 to 109.8)      | 77.6 (44.7 to 128.9)      | 53.6 (30.9 to 91.2)       | 89.9 (52 to 140.8)        | 102.3 (58.7 to 165.7)     | 76.3 (43.2 to 122.1)     | 36.3 (6.9 to 74)       | 31.9 (-3.6 to 82.6)    |
| High LDL cholesterol                     | Deaths      | Deaths  | 19.2 (7.7 to 38.6)      | 18.8 (7 to 39.5)          | 19.4 (8.2 to 38.3)        | 19.5 (7.4 to 40.3)        | 18.5 (6.7 to 38.9)        | 20.4 (8 to 41)            | 1.6 (-22.3 to 25.6)      | -1.7 (-27.9 to 25.9)   | 5.4 (-23 to 39)        |
|                                          |             |         | DALYs                   | 436.6 (251.8 to 718.9)    | 430.9 (244 to 718)        | 441.4 (250.9 to 744.7)    | 415.3 (234.4 to 709.9)    | 403.5 (222.3 to 676.1)    | 427.2 (240 to 738.5)     | -4.9 (-26.6 to 19.7)   | -6.4 (-28.9 to 19.7)   |
|                                          | YLLs        | YLLs    | 369.3 (207.3 to 616)    | 349.7 (186.3 to 614)      | 388.1 (217.5 to 661.9)    | 349.3 (186.7 to 619.3)    | 323.5 (161 to 572.7)      | 375.5 (202.2 to 662)      | -5.4 (-31.2 to 24.2)     | -7.5 (-34.9 to 26.8)   | -3.2 (-32 to 36)       |
|                                          |             |         | YLDs                    | 67.3 (40.3 to 111.4)      | 81.2 (49 to 133.7)        | 53.3 (31.5 to 86.7)       | 66.1 (39.3 to 109.2)      | 80 (47.6 to 131.4)        | 51.8 (30.8 to 85.5)      | -1.9 (-8.7 to 5.5)     | -1.5 (-10.6 to 8.8)    |
| High systolic blood pressure             | Deaths      | Deaths  | 91.1 (71.7 to 113.8)    | 88.6 (67.7 to 114.9)      | 93.1 (70.3 to 123.4)      | 83.6 (64.9 to 104.3)      | 75.2 (56.6 to 95.2)       | 92.2 (70.5 to 115.6)      | -8.2 (-28.7 to 14.2)     | -15.1 (-36.8 to 13.1)  | -1 (-25.6 to 30.5)     |
|                                          |             |         | DALYs                   | 2097 (1692.7 to 2588.2)   | 2017.6 (1584.6 to 2523.2) | 2172.7 (1648 to 2884.8)   | 1822.7 (1421.5 to 2274.3) | 1628.4 (1266.6 to 2040.3) | 2018.5 (1530.1 to 2530)  | -13.1 (-33.1 to 10)    | -19.3 (-39.1 to 6.9)   |
|                                          | YLLs        | YLLs    | 1904 (1516.6 to 2362.5) | 1791.8 (1379.5 to 2273.1) | 2013.7 (1506 to 2694.2)   | 1633.8 (1244.7 to 2072.3) | 1411.8 (1067.9 to 1800.6) | 1859.1 (1385 to 2359.2)   | -14.2 (-36 to 11.6)      | -21.2 (-42.4 to 7.5)   | -7.7 (-32.8 to 26)     |
|                                          |             |         | YLDs                    | 193 (137.2 to 254.6)      | 225.9 (162 to 302.4)      | 159 (110.6 to 210.5)      | 188.9 (136.2 to 244.9)    | 216.6 (155.2 to 282.5)    | 159.4 (113.3 to 208.2)   | -2.1 (-11.2 to 9)      | -4.1 (-17.1 to 11.9)   |
| High temperature                         | Deaths      | Deaths  | 4 (0.5 to 8.8)          | 3.9 (0.5 to 8.5)          | 4.2 (0.6 to 9.5)          | 4.2 (0.9 to 8.4)          | 3.8 (0.8 to 7.7)          | 4.6 (1 to 9.2)            | 4 (-35.8 to 79.3)        | -1.6 (-39.6 to 66.2)   | 10 (-33.3 to 93.3)     |
|                                          |             |         | YLLs                    | 79.7 (10.4 to 177.4)      | 73.9 (9.3 to 164.4)       | 85.4 (11.6 to 193.4)      | 76.5 (16.3 to 156.3)      | 66.6 (13.6 to 133.6)      | 86.5 (19 to 176.6)       | -4 (-41.6 to 62.6)     | -9.9 (-45.1 to 52.9)   |
| Household air pollution from solid fuels | Deaths      | Deaths  | 15 (7.1 to 25.3)        | 16.3 (8.1 to 27.2)        | 13.4 (5.9 to 23.8)        | 0.1 (0 to 0.2)            | 0.1 (0 to 0.2)            | 0.1 (0 to 0.2)            | -99.3 (-99.7 to -98.4)   | -99.3 (-99.7 to -98.5) | -99.3 (-99.7 to -98.4) |
|                                          |             |         | DALYs                   | 363.6 (173.3 to 611.3)    | 396.7 (201.8 to 655.1)    | 328.4 (144.8 to 577.1)    | 2.3 (0.8 to 5.1)          | 2.5 (0.9 to 5.5)          | 2.1 (0.7 to 4.8)         | -99.4 (-99.7 to -98.5) | -99.4 (-99.7 to -98.5) |
|                                          | YLLs        | YLLs    | 327.7 (155.1 to 554.2)  | 350.1 (174 to 578.4)      | 303.4 (130.9 to 533.4)    | 2 (0.7 to 4.6)            | 2.2 (0.8 to 4.8)          | 1.9 (0.6 to 4.4)          | -99.4 (-99.8 to -98.5)   | -99.4 (-99.8 to -98.5) | -99.4 (-99.8 to -98.4) |
|                                          |             |         | YLDs                    | 35.9 (17.2 to 61.1)       | 46.5 (23 to 77.9)         | 25 (10.9 to 45.4)         | 0.3 (0.1 to 0.6)          | 0.4 (0.1 to 0.8)          | 0.2 (0.1 to 0.4)         | -99.3 (-99.7 to -98.3) | -99.2 (-99.7 to -98.3) |
| Kidney                                   | Deaths      | Deaths  | 14.4 (10.5 to 18.7)     | 14.8 (10.4 to 19.6)       | 13.9 (10 to 18.3)         | 17.1 (11.6 to 22.6)       | 15.8 (10.4 to 21.4)       | 18.6 (12.9 to 24.1)       | 19.1 (-8.3 to 48.3)      | 6.3 (-21.3 to 38.7)    | 33.9 (-1.1 to 76.9)    |

| Location                             | Risk factor           | Measure               | 1990                    |                           |                           | 2019                     |                          |                         | % Change (1990 to 2019)  |                         |                         |                       |
|--------------------------------------|-----------------------|-----------------------|-------------------------|---------------------------|---------------------------|--------------------------|--------------------------|-------------------------|--------------------------|-------------------------|-------------------------|-----------------------|
|                                      |                       |                       | Both                    | Female                    | Male                      | Both                     | Female                   | Male                    | Both                     | Female                  | Male                    |                       |
| United States                        | dysfunction           | DALYs                 | 325.7 (254.1 to 403.7)  | 338.5 (256.9 to 427.2)    | 312.1 (234.9 to 401.6)    | 367.2 (272.9 to 460.4)   | 345.2 (255 to 440.3)     | 390.2 (288 to 490.5)    | 12.7 (-11.3 to 40.4)     | 2 (-22.3 to 30.7)       | 25 (-7.3 to 64.4)       |                       |
|                                      |                       | YLLs                  | 292.1 (226.8 to 367.1)  | 296.5 (223.7 to 377)      | 287.2 (213.5 to 372.9)    | 326.5 (239.3 to 416.1)   | 296.2 (216 to 384.3)     | 358.3 (262.5 to 459.4)  | 11.8 (-14.9 to 43)       | -0.1 (-27 to 32.6)      | 24.8 (-9.7 to 68.9)     |                       |
|                                      |                       | YLDs                  | 33.6 (23.1 to 44.8)     | 42 (28.8 to 56.2)         | 24.9 (16.9 to 33.3)       | 40.7 (27.8 to 54.5)      | 49 (32.9 to 66.1)        | 31.9 (21.8 to 42.6)     | 21.1 (12.2 to 30.6)      | 16.7 (6 to 28.5)        | 28.3 (15.2 to 43)       |                       |
|                                      | Lead exposure         | Deaths                | 6.9 (3.6 to 10.7)       | 5.2 (2.3 to 8.6)          | 8.8 (4.8 to 13.6)         | 5.8 (3.1 to 9)           | 4.1 (1.8 to 6.8)         | 7.6 (4.2 to 11.4)       | -16.5 (-34.6 to 4)       | -20.4 (-40.5 to 4.8)    | -13.1 (-33.9 to 13.9)   |                       |
|                                      |                       | DALYs                 | 159.9 (79.3 to 255.9)   | 116.3 (47.2 to 194.5)     | 204.7 (109.9 to 321.5)    | 113.9 (55.8 to 181.6)    | 79 (31 to 135.7)         | 150.8 (80.1 to 232.6)   | -28.8 (-45.5 to -9.4)    | -32.1 (-49.8 to -12.3)  | -26.3 (-45.3 to -1.9)   |                       |
|                                      |                       | YLLs                  | 146.2 (72.3 to 235.9)   | 103.6 (41.4 to 172.8)     | 190 (101.1 to 300.5)      | 103.3 (49.8 to 166.4)    | 69.1 (27 to 118.1)       | 139.6 (73.3 to 217.5)   | -29.3 (-47.4 to -8.5)    | -33.3 (-51.9 to -11.7)  | -26.5 (-46.4 to -0.1)   |                       |
|                                      | Low physical activity | YLDs                  | 13.7 (6.1 to 22.5)      | 12.7 (4.8 to 22.2)        | 14.7 (7.7 to 23.3)        | 10.6 (4.5 to 18.2)       | 9.9 (3.4 to 18.1)        | 11.2 (5.4 to 18.4)      | -23 (-33.9 to -15.2)     | -22.5 (-36.1 to -10.5)  | -23.7 (-35.5 to -13.4)  |                       |
|                                      |                       | Deaths                | 9.6 (2.3 to 19.9)       | 9.5 (2.3 to 19.9)         | 9.6 (1.9 to 20)           | 10 (2.3 to 20.6)         | 9.6 (2.4 to 19.3)        | 10.5 (2.2 to 21.5)      | 4.5 (-17 to 30.5)        | 0.9 (-22.3 to 34.2)     | 9 (-15.4 to 47.9)       |                       |
|                                      |                       | DALYs                 | 154.9 (32.9 to 349.8)   | 154.3 (37 to 345.9)       | 155 (28.1 to 358.3)       | 155.5 (34.2 to 351.1)    | 150.9 (33.9 to 329.1)    | 160.3 (30.5 to 363.8)   | 0.4 (-19.5 to 25.3)      | -2.2 (-23.3 to 28.2)    | 3.4 (-19.9 to 39.7)     |                       |
|                                      | Low temperature       | YLLs                  | 135.7 (29.1 to 301.6)   | 131.4 (31.5 to 296.3)     | 139.8 (24.3 to 323.1)     | 136.3 (29.5 to 305.4)    | 127.7 (28.9 to 280.4)    | 145.6 (28.1 to 324.5)   | 0.4 (-21.8 to 28.1)      | -2.8 (-26.8 to 32)      | 4.1 (-21.2 to 44.5)     |                       |
|                                      |                       | YLDs                  | 19.1 (3.6 to 45.4)      | 22.9 (4.6 to 54.3)        | 15.1 (2.6 to 37.4)        | 19.1 (3.7 to 44.2)       | 23.2 (4.8 to 54.2)       | 14.7 (2.5 to 35.1)      | 0 (-8.7 to 13.8)         | 1.6 (-10.2 to 19.8)     | -3.2 (-14.9 to 14.4)    |                       |
|                                      |                       | Deaths                | 7.9 (2.2 to 14.1)       | 7.6 (2.1 to 13.1)         | 8.2 (2.1 to 15.1)         | 7.3 (1.8 to 13.1)        | 6.7 (1.7 to 11.9)        | 8 (2 to 14.3)           | -7.1 (-29.4 to 18.9)     | -12.1 (-34.7 to 15.8)   | -1.9 (-28.1 to 31)      |                       |
|                                      | Secondhand smoke      | YLLs                  | 156.2 (42.2 to 273.9)   | 144.7 (41 to 251.4)       | 167.6 (43.5 to 310.5)     | 133.7 (33.9 to 240.9)    | 116.5 (28.8 to 210.4)    | 151.3 (38 to 272.7)     | -14.4 (-36.6 to 13)      | -19.5 (-41.6 to 8.9)    | -9.7 (-35.2 to 24.3)    |                       |
|                                      |                       | Deaths                | 7.2 (5.2 to 9.5)        | 7.7 (5.5 to 10.3)         | 6.6 (4.7 to 9)            | 5.8 (4 to 7.7)           | 5.7 (4 to 7.7)           | 5.8 (4 to 7.9)          | -19.7 (-38 to 1.1)       | -26.1 (-45.7 to -2)     | -11.6 (-34.2 to 19.1)   |                       |
|                                      |                       | DALYs                 | 178.1 (128.6 to 233.6)  | 198.7 (140.9 to 262.3)    | 158 (110.1 to 220.1)      | 134.8 (92.6 to 184.5)    | 140 (96.8 to 188.9)      | 130.2 (87.7 to 181.6)   | -24.3 (-42.3 to -3)      | -29.5 (-49.5 to -4.7)   | -17.6 (-39.8 to 12.4)   |                       |
|                                      | Smoking               | YLLs                  | 167.3 (120 to 221)      | 184.1 (129.5 to 246.3)    | 150.9 (104.8 to 209.5)    | 125.4 (85.1 to 172.5)    | 127.4 (87 to 175.5)      | 123.9 (82.5 to 173.9)   | -25.1 (-43.8 to -2.3)    | -30.8 (-51.5 to -4.2)   | -17.9 (-41 to 13.5)     |                       |
|                                      |                       | YLDs                  | 10.8 (7.1 to 14.9)      | 14.6 (9.6 to 20.2)        | 7.1 (4.6 to 9.9)          | 9.4 (6.1 to 12.9)        | 12.6 (8.2 to 17.1)       | 6.3 (4.1 to 8.8)        | -12.8 (-20 to -4.9)      | -13.8 (-22.3 to -4.7)   | -11 (-22.8 to 3)        |                       |
|                                      |                       | Deaths                | 28.7 (23.1 to 35.5)     | 11.5 (8.1 to 16.1)        | 46.9 (36.8 to 59.4)       | 20.5 (16.1 to 25)        | 7.7 (5.7 to 10.2)        | 34.4 (27.2 to 41.4)     | -28.7 (-46.3 to -6.7)    | -33.3 (-55.5 to -0.8)   | -26.7 (-45.3 to -2.2)   |                       |
|                                      | European Union        | All risk factors      | DALYs                   | 765.9 (616.4 to 938.5)    | 305.5 (219.4 to 420)      | 1235.3 (971.1 to 1553.1) | 523.7 (409.6 to 649.5)   | 196.5 (143.9 to 261.8)  | 860.4 (674 to 1060.4)    | -31.6 (-48.8 to -9.9)   | -35.7 (-56.1 to -6)     | -30.3 (-48.2 to -5.6) |
|                                      |                       |                       | YLLs                    | 701.4 (555.4 to 876.7)    | 270 (190.6 to 373.9)      | 1141.6 (879.8 to 1460.6) | 474.2 (361.2 to 597.9)   | 169.2 (122.1 to 228.8)  | 788.7 (606 to 992.5)     | -32.4 (-50.4 to -9)     | -37.3 (-58.6 to -5.8)   | -30.9 (-49.8 to -4.3) |
| YLDs                                 |                       |                       | 64.5 (46 to 81.9)       | 35.5 (22.9 to 49.9)       | 93.8 (67 to 121)          | 49.5 (35.2 to 63.4)      | 27.3 (18.1 to 38.1)      | 71.7 (50.9 to 91.4)     | -23.3 (-32 to -13.6)     | -23.1 (-42.7 to 3)      | -23.5 (-31.1 to -15.7)  |                       |
| Deaths                               |                       |                       | 127 (103.3 to 151.1)    | 150.8 (119.4 to 183.3)    | 102.7 (75.1 to 125.1)     | 64.5 (52.5 to 76.8)      | 70.7 (55.9 to 86.9)      | 59.2 (42.2 to 74.3)     | -49.2 (-59 to -38.3)     | -53.1 (-63.6 to -39.2)  | -42.3 (-57.3 to -23.8)  |                       |
| Alcohol use                          |                       | DALYs                 | 2527.4 (2119.7 to 2954) | 2950.5 (2455.2 to 3496.7) | 2101.4 (1563.8 to 2514.3) | 1271.7 (1063 to 1477.1)  | 1367.2 (1135.6 to 1630)  | 1186 (912.8 to 1449.4)  | -49.7 (-58.3 to -40.2)   | -53.7 (-63.2 to -41.9)  | -43.6 (-57.2 to -27.6)  |                       |
|                                      |                       | YLLs                  | 2205.7 (1828.2 to 2607) | 2564.9 (2065.7 to 3109.3) | 1842.8 (1318.3 to 2260.4) | 1023.3 (847.5 to 1213.8) | 1070.4 (845.1 to 1334.9) | 981.2 (715.4 to 1234.3) | -53.6 (-62.9 to -43.1)   | -58.3 (-67.9 to -45.2)  | -46.8 (-61.5 to -29.2)  |                       |
|                                      |                       | YLDs                  | 321.7 (235.1 to 407.7)  | 385.5 (281.6 to 489.7)    | 258.7 (187.5 to 329.9)    | 248.4 (181.1 to 316.2)   | 296.8 (216.6 to 378)     | 204.8 (147.3 to 263.9)  | -22.8 (-27.8 to -17.8)   | -23 (-28.9 to -17)      | -20.8 (-28.9 to -11.8)  |                       |
|                                      |                       | Deaths                | 0.1 (-0.2 to 0.4)       | -0.2 (-0.4 to 0)          | 0.4 (-0.1 to 1)           | 0.1 (-0.1 to 0.3)        | -0.1 (-0.3 to 0)         | 0.3 (-0.1 to 0.6)       | -5.7 (-672.3 to 545.7)   | -41.4 (-124.6 to 67.4)  | -31.1 (-260.7 to 239.1) |                       |
| Ambient particulate matter pollution |                       | DALYs                 | 4.4 (-3 to 13.7)        | -3.5 (-7.9 to 1.6)        | 12 (-1.1 to 28)           | 3.5 (-1.6 to 9.2)        | -2.2 (-4.7 to 0.6)       | 8.5 (-0.6 to 18)        | -21.7 (-578.9 to 398.7)  | -38.5 (-200.6 to 109.5) | -29.5 (-174.7 to 191.9) |                       |
|                                      |                       | YLLs                  | 4.3 (-2.2 to 12.5)      | -2.7 (-6.7 to 1.8)        | 11 (-0.3 to 25.8)         | 3.1 (-1 to 7.8)          | -1.5 (-3.5 to 0.6)       | 7.2 (0 to 15.2)         | -27.8 (-476.8 to 459.5)  | -45.1 (-178.3 to 153.6) | -34.6 (-125.7 to 201.5) |                       |
|                                      |                       | YLDs                  | 0.1 (-0.8 to 1.2)       | -0.8 (-1.5 to -0.1)       | 1 (-0.7 to 3)             | 0.4 (-0.6 to 1.4)        | -0.7 (-1.3 to 0)         | 1.3 (-0.4 to 3.1)       | 201.4 (-960.2 to 1322.7) | -15.4 (-86.4 to 55.8)   | 29 (-646.1 to 886.3)    |                       |
|                                      |                       | Deaths                | 28 (21.1 to 35.6)       | 32.6 (24.2 to 41.4)       | 23.3 (16.3 to 29.9)       | 14.6 (11.2 to 18.4)      | 15.6 (11.7 to 20.1)      | 13.6 (9.5 to 17.9)      | -48 (-58.8 to -35.8)     | -52 (-63 to -36.6)      | -41.6 (-57.5 to -21.9)  |                       |
| Diet high in red meat                |                       | DALYs                 | 627.4 (487.2 to 773.8)  | 724.5 (558.5 to 905.9)    | 530.9 (391.1 to 674)      | 327.8 (259 to 404.2)     | 348.8 (268.1 to 437.3)   | 308.7 (229.7 to 398.6)  | -47.7 (-57.5 to -36.8)   | -51.9 (-61.9 to -38.9)  | -41.8 (-56.4 to -24.2)  |                       |
|                                      |                       | YLLs                  | 541.8 (411.3 to 677.9)  | 622.6 (464 to 793.9)      | 461.3 (332.4 to 592.3)    | 258.1 (197 to 326.5)     | 265.7 (197 to 345.6)     | 251 (175.9 to 333.3)    | -52.4 (-62.7 to -40.2)   | -57.3 (-67.4 to -42.9)  | -45.6 (-61.3 to -26)    |                       |
|                                      |                       | YLDs                  | 85.5 (59 to 113.5)      | 101.9 (70.4 to 135.7)     | 69.6 (47.9 to 92.6)       | 69.7 (48.6 to 91.9)      | 83 (58 to 109)           | 57.7 (39.8 to 77.2)     | -18.5 (-25 to -11.7)     | -18.5 (-24.9 to -11.4)  | -17 (-26.2 to -7.6)     |                       |
| Diet high in sodium                  |                       | Deaths                | 4.1 (1.4 to 6.6)        | 4.8 (1.6 to 7.8)          | 3.4 (1.2 to 5.5)          | 2 (0.7 to 3.1)           | 2.1 (0.7 to 3.4)         | 1.9 (0.6 to 3.1)        | -52.4 (-63.2 to -38.9)   | -56.6 (-68.7 to -39.5)  | -45.9 (-62 to -25.5)    |                       |
|                                      |                       | DALYs                 | 102.5 (36.3 to 159.2)   | 119.1 (41.3 to 186.5)     | 86.5 (30.3 to 136.6)      | 48.8 (16.8 to 77.1)      | 51.5 (17.4 to 83.3)      | 46.5 (15.8 to 75)       | -52.4 (-62.7 to -41)     | -56.8 (-67.8 to -44.1)  | -46.3 (-61.1 to -28.5)  |                       |
|                                      |                       | YLLs                  | 87.4 (31.9 to 138.5)    | 100.9 (36 to 160.3)       | 74.2 (25.4 to 119.1)      | 37.3 (13.2 to 58.5)      | 37.8 (14.2 to 62.1)      | 36.9 (12.5 to 60.8)     | -57.3 (-67.4 to -45.5)   | -62.6 (-72.8 to -48)    | -50.3 (-65.4 to -30.5)  |                       |
| Diet low in fiber                    |                       | YLDs                  | 15.1 (4.1 to 25)        | 18.1 (4.9 to 30.2)        | 12.3 (3.3 to 20.4)        | 11.5 (3.1 to 19.3)       | 13.7 (3.6 to 23.2)       | 9.6 (2.6 to 16.2)       | -23.9 (-30.6 to -15.7)   | -24.6 (-33.8 to -13.7)  | -21.5 (-32.1 to -10.5)  |                       |
|                                      |                       | Deaths                | 2.3 (0.4 to 9)          | 2 (0.5 to 7.9)            | 2.5 (0.3 to 10.3)         | 1.1 (0.2 to 4.4)         | 0.9 (0.2 to 3.5)         | 1.4 (0.1 to 5.6)        | -49.9 (-74 to -13.1)     | -56.9 (-78.6 to -5)     | -45.4 (-70.1 to 30.1)   |                       |
|                                      | DALYs                 | 51.9 (7.6 to 208.2)   | 44.6 (9 to 185.4)       | 59.1 (4.9 to 237.7)       | 26.3 (3.8 to 103.3)       | 19.3 (4.1 to 79.2)       | 32.6 (2.8 to 127.6)      | -49.4 (-72.5 to -11.6)  | -56.8 (-80.8 to 0.3)     | -44.9 (-68.3 to 16.9)   |                         |                       |
| Diet low in fruits                   | YLLs                  | 45.1 (6.6 to 180.3)   | 38.5 (7.8 to 159.1)     | 51.6 (4.3 to 205.9)       | 21 (3 to 83.1)            | 14.9 (3.2 to 60.5)       | 26.5 (2.3 to 104.3)      | -53.4 (-75 to -18.1)    | -61.3 (-82.6 to -7.7)    | -48.5 (-72.2 to 17.1)   |                         |                       |
|                                      | YLDs                  | 6.8 (0.9 to 28.4)     | 6 (1.1 to 25.2)         | 7.5 (0.6 to 30.6)         | 5.3 (0.7 to 20.8)         | 4.4 (0.9 to 18.2)        | 6 (0.4 to 23.7)          | -22.8 (-56.9 to 34.2)   | -27.6 (-68.2 to 57.6)    | -20.1 (-48 to 52.1)     |                         |                       |
|                                      | Deaths                | 5.5 (1.2 to 10.3)     | 6.6 (1.4 to 12.2)       | 4.5 (1 to 8.4)            | 2.1 (0.5 to 4.1)          | 2.2 (0.5 to 4.5)         | 1.9 (0.4 to 3.8)         | -62.5 (-72.1 to -51.9)  | -65.7 (-76.8 to -52.7)   | -57.2 (-70.7 to -40.1)  |                         |                       |
| Diet low in fruits                   | DALYs                 | 122 (25.4 to 223.6)   | 142.7 (28.7 to 268.5)   | 101.6 (22.1 to 190.5)     | 46.7 (9.6 to 89.8)        | 49.8 (9.8 to 98.7)       | 43.9 (8.7 to 86.6)       | -61.7 (-70.2 to -52.6)  | -65.1 (-74.2 to -54.6)   | -56.8 (-68.4 to -42.5)  |                         |                       |
|                                      | YLLs                  | 104.2 (21.8 to 192.5) | 121.3 (24.8 to 230.3)   | 87.2 (18.1 to 165)        | 35.8 (7.3 to 69.9)        | 36.9 (7.4 to 75)         | 34.9 (7 to 68.8)         | -65.6 (-74.1 to -56.3)  | -69.6 (-78.6 to -58)     | -60 (-72.5 to -44.1)    |                         |                       |
|                                      | YLDs                  | 17.8 (3.6 to 33.7)    | 21.4 (4.2 to 40.7)      | 14.4 (3 to 26.9)          | 10.9 (2.1 to 21.7)        | 13 (2.5 to 26)           | 9 (1.7 to 17.8)          | -38.9 (-48.1 to -31.1)  | -39.3 (-51.1 to -29.3)   | -37 (-50.1 to -26.5)    |                         |                       |
| Diet low in fruits                   | Deaths                | 6.3 (2.6 to 10.9)     | 7.5 (3.1 to 13.2)       | 5.1 (2 to 9.1)            | 3.1 (1.2 to 5.5)          | 3.3 (1.3 to 5.9)         | 2.8 (1.1 to 5.1)         | -51.7 (-62.5 to -38.9)  | -56 (-67.4 to -40.3)     | -44.6 (-60.6 to -24.8)  |                         |                       |
|                                      | DALYs                 | 147.3 (60.9 to 254.5) | 174.3 (72.8 to 303.2)   | 120.9 (48.3 to 212.8)     | 72.8 (30.1 to 125.6)      | 78.1 (31.7 to 137.7)     | 68 (26.7 to 120.5)       | -50.6 (-60.8 to -39.6)  | -55.2 (-66.1 to -41.7)   | -43.8 (-58.4 to -25.5)  |                         |                       |
|                                      | YLLs                  | 127.3 (54.3 to 220.1) | 150.1 (64.8 to 257.7)   | 105.1 (43 to 186.1)       | 56.7 (23.9 to 100.1)      | 58.8 (24.3 to 103.1)     | 54.8 (21.9 to 98)        | -55.5 (-65.4 to -43.5)  | -60.8 (-71.2 to -46.6)   | -47.8 (-62.9 to -28.2)  |                         |                       |
| Diet low in fruits                   | YLDs                  | 20 (6.5 to 37.9)      | 24.3 (7.8 to 46)        | 15.9 (5.1 to 30.2)        | 16.1 (5.5 to 30)          | 19.4 (6.5 to 36.3)       | 13.2 (4.5 to 25)         | -19.5 (-26 to -5.4)     | -20.2 (-27.8 to -4.9)    | -16.9 (-26.1 to -0.2)   |                         |                       |

| Location                                 | Risk factor | Measure             | 1990                      |                           |                          | 2019                   |                         |                        | % Change (1990 to 2019) |                        |                        |
|------------------------------------------|-------------|---------------------|---------------------------|---------------------------|--------------------------|------------------------|-------------------------|------------------------|-------------------------|------------------------|------------------------|
|                                          |             |                     | Both                      | Female                    | Male                     | Both                   | Female                  | Male                   | Both                    | Female                 | Male                   |
| Diet low in vegetables                   | Deaths      | Deaths              | 3.1 (1 to 5.6)            | 3.6 (1.1 to 6.5)          | 2.7 (0.8 to 4.8)         | 1.3 (0.4 to 2.3)       | 1.3 (0.4 to 2.4)        | 1.2 (0.3 to 2.3)       | -59.2 (-70.3 to -47.8)  | -62.9 (-75.3 to -48.8) | -53.8 (-68.3 to -36.5) |
|                                          |             | DALYs               | 67.1 (19.6 to 123.4)      | 75.9 (21.4 to 140.1)      | 58.4 (16.6 to 109.3)     | 27.7 (7.5 to 51.2)     | 28.4 (7.4 to 52.5)      | 27.1 (7 to 51.5)       | -58.7 (-69.2 to -47.5)  | -62.6 (-73.5 to -49.7) | -53.6 (-67.5 to -37.3) |
|                                          |             | YLLs                | 58.1 (16.9 to 110)        | 65.4 (18.4 to 122.7)      | 50.9 (14.2 to 96.7)      | 21.8 (5.9 to 40.7)     | 21.5 (5.9 to 40)        | 22 (5.8 to 42.2)       | -62.5 (-72.6 to -51.2)  | -67.1 (-77.7 to -53.3) | -56.8 (-70.7 to -38.7) |
|                                          |             | YLDs                | 9 (1.9 to 17)             | 10.5 (2.2 to 20)          | 7.5 (1.7 to 14.2)        | 5.9 (1.2 to 11.5)      | 6.8 (1.4 to 13.4)       | 5.1 (1.1 to 10)        | -34 (-46 to -24.4)      | -34.8 (-48.7 to -24)   | -31.8 (-47.3 to -18.9) |
| Diet low in whole grains                 | Deaths      | Deaths              | 9.6 (5.6 to 12.9)         | 11.4 (6.6 to 15.4)        | 7.7 (4.3 to 10.5)        | 5 (3 to 6.7)           | 5.6 (3.3 to 7.6)        | 4.6 (2.5 to 6.3)       | -47.6 (-58.5 to -35.9)  | -51.2 (-62.2 to -36.3) | -40.9 (-56 to -22.6)   |
|                                          |             | DALYs               | 190.2 (107.2 to 253.4)    | 222 (125.4 to 298)        | 158 (87.4 to 213.6)      | 101.4 (57.6 to 136.3)  | 110.4 (62 to 148.5)     | 93.2 (51.7 to 131)     | -46.7 (-56.5 to -37)    | -50.3 (-60.4 to -38.5) | -41 (-54.5 to -24.5)   |
|                                          |             | YLLs                | 157.7 (88.5 to 212.3)     | 182.9 (102.9 to 250.2)    | 131.9 (72.4 to 181.6)    | 76.5 (44 to 103.6)     | 80.6 (45.7 to 111.1)    | 72.9 (39.2 to 103.9)   | -51.5 (-62 to -39.9)    | -55.9 (-66.3 to -41.6) | -44.8 (-59.9 to -25.3) |
|                                          |             | YLDs                | 32.5 (17.1 to 46.9)       | 39.2 (20.9 to 56.9)       | 26.1 (13.7 to 37.7)      | 24.8 (13.1 to 35.8)    | 29.8 (15.7 to 43.3)     | 20.4 (10.5 to 29.6)    | -23.7 (-29.1 to -18.4)  | -23.9 (-29.8 to -17.2) | -21.8 (-30.8 to -12.9) |
| High body-mass index                     | Deaths      | Deaths              | 31.6 (19.3 to 44.6)       | 40.2 (25.3 to 56.4)       | 23 (11.9 to 34.9)        | 18.2 (11.1 to 25.6)    | 19.9 (12.1 to 28.8)     | 16.8 (9.7 to 24.7)     | -42.3 (-55.5 to -25.4)  | -50.5 (-63.5 to -32.9) | -27 (-49.1 to 7.6)     |
|                                          |             | DALYs               | 893.3 (584.2 to 1198.1)   | 1135.8 (764.9 to 1513)    | 658.3 (374.9 to 959.3)   | 522 (358.2 to 687.1)   | 569.1 (393 to 758.7)    | 478.9 (313.2 to 662.4) | -41.6 (-53.3 to -26)    | -49.9 (-60.9 to -35.5) | -27.3 (-47 to 2.3)     |
|                                          |             | YLLs                | 765.9 (489.9 to 1041.1)   | 968.8 (637.1 to 1319.6)   | 568.4 (308 to 834.6)     | 401 (266 to 537.8)     | 420.9 (278 to 574.5)    | 382.1 (230.8 to 545.1) | -47.6 (-59.1 to -31.5)  | -56.6 (-68 to -41.2)   | -32.8 (-53.3 to -1.4)  |
|                                          |             | YLDs                | 127.5 (77.7 to 185.1)     | 167 (105.9 to 236)        | 89.9 (51.4 to 137.4)     | 120.9 (79.4 to 166.9)  | 148.2 (99.1 to 203.1)   | 96.8 (60.2 to 136.9)   | -5.1 (-14.6 to 8.5)     | -11.3 (-20 to 1)       | 7.7 (-8.6 to 35.8)     |
| High fasting plasma glucose              | Deaths      | Deaths              | 38.4 (21.5 to 68.8)       | 48.3 (26.1 to 93)         | 28 (15.6 to 48.9)        | 22.5 (12.3 to 40.8)    | 24.4 (13 to 46.1)       | 20.8 (11.2 to 37.4)    | -41.3 (-56.9 to -21.1)  | -49.4 (-65.6 to -26.4) | -25.7 (-53.8 to 18.4)  |
|                                          |             | DALYs               | 726.3 (442.4 to 1178.8)   | 888.3 (520.2 to 1527)     | 554.4 (328.5 to 885.6)   | 432.5 (257.9 to 673.1) | 458.3 (266.9 to 746.4)  | 407.5 (241.2 to 655.3) | -40.4 (-55.6 to -20.8)  | -48.4 (-64.7 to -26.9) | -26.5 (-53.1 to 12.6)  |
|                                          |             | YLLs                | 639 (387 to 1044.8)       | 779.9 (450.7 to 1354)     | 489.3 (287.2 to 784.8)   | 353.5 (209.8 to 562.8) | 365.9 (208.7 to 613.4)  | 340.9 (194.1 to 551.6) | -44.7 (-59.4 to -24.8)  | -53.1 (-68.8 to -31.9) | -30.3 (-57.2 to 10.6)  |
|                                          |             | YLDs                | 87.3 (48.7 to 148.8)      | 108.4 (56.4 to 191.3)     | 65.1 (34.9 to 113.5)     | 79.1 (43.5 to 128.7)   | 92.4 (49.6 to 156.7)    | 66.5 (36 to 109.7)     | -9.4 (-27.5 to 13.4)    | -14.8 (-36.5 to 16)    | 2.1 (-26.9 to 42.6)    |
| High LDL cholesterol                     | Deaths      | Deaths              | 22.5 (7.8 to 46.5)        | 27.9 (9.3 to 58.7)        | 17 (6.3 to 35.4)         | 12.6 (4.1 to 26.6)     | 14.6 (4.4 to 32.2)      | 10.9 (3.7 to 23.6)     | -44.1 (-56.9 to -32)    | -47.7 (-61.9 to -32.9) | -36.3 (-54.5 to -16.2) |
|                                          |             | DALYs               | 468.1 (255.6 to 794.7)    | 567.3 (299.9 to 985)      | 370.2 (196.8 to 645.7)   | 264.8 (137.4 to 468.4) | 298.8 (147.9 to 540.1)  | 234.5 (123.5 to 409)   | -43.4 (-53.7 to -32.7)  | -47.3 (-58.1 to -35.2) | -36.6 (-51.3 to -18.4) |
|                                          |             | YLLs                | 381.3 (191.4 to 679.1)    | 458.8 (218.7 to 847.8)    | 303.9 (151.9 to 556.3)   | 194.5 (89.5 to 364.2)  | 211.9 (91 to 414.1)     | 178.7 (85 to 333.5)    | -49 (-60.8 to -36.8)    | -53.8 (-66.7 to -39.7) | -41.2 (-58.5 to -19.8) |
|                                          |             | YLDs                | 86.8 (51 to 140.9)        | 108.4 (64.2 to 175)       | 66.3 (39.3 to 109.1)     | 70.4 (40.4 to 114.6)   | 86.9 (49.8 to 141.2)    | 55.8 (32.5 to 90.7)    | -19 (-25.1 to -12.5)    | -19.9 (-27.6 to -11.9) | -15.8 (-25.9 to -5.1)  |
| High systolic blood pressure             | Deaths      | Deaths              | 72 (53.9 to 92.3)         | 89.7 (64.8 to 120)        | 54 (36.3 to 72.4)        | 36.5 (27.4 to 47.9)    | 41.4 (28.9 to 55.8)     | 32.3 (21.8 to 44.3)    | -49.3 (-61 to -35.2)    | -53.8 (-67.4 to -36)   | -40.2 (-58.3 to -17.4) |
|                                          |             | DALYs               | 1485.8 (1168.1 to 1832.9) | 1808.8 (1386 to 2308.3)   | 1159.9 (840.7 to 1489.5) | 752.3 (585.1 to 924.9) | 825.7 (615.4 to 1057.1) | 685.2 (493.8 to 877.9) | -49.4 (-60.1 to -37.2)  | -54.4 (-66.2 to -38.6) | -40.9 (-57.3 to -21)   |
|                                          |             | YLLs                | 1298.3 (1005 to 1627.2)   | 1575.8 (1180.7 to 2036.8) | 1017.6 (714 to 1318.7)   | 605.6 (465.2 to 763.2) | 649 (472.2 to 862.2)    | 565.9 (386.4 to 744.8) | -53.4 (-64.7 to -40.7)  | -58.8 (-70.6 to -42.7) | -44.4 (-61.2 to -22.8) |
|                                          |             | YLDs                | 187.5 (130.4 to 249.5)    | 233 (159.6 to 312.9)      | 142.3 (95.9 to 192.6)    | 146.7 (101.3 to 197)   | 176.7 (119.3 to 238.4)  | 119.3 (82.5 to 161.6)  | -21.7 (-31.6 to -8.9)   | -24.2 (-37.6 to -5.7)  | -16.1 (-29.5 to 1.9)   |
| High temperature                         | Deaths      | Deaths              | 0.3 (-0.5 to 1.8)         | 0.4 (-0.6 to 2.2)         | 0.3 (-0.4 to 1.6)        | 0.4 (-0.3 to 1.3)      | 0.4 (-0.3 to 1.4)       | 0.4 (-0.2 to 1.2)      | 24 (-609.2 to 760.5)    | 15.1 (-580.7 to 601.1) | 40.1 (-669.2 to 943.2) |
|                                          |             | YLLs                | 5.5 (-9.2 to 31.2)        | 6.4 (-10.7 to 35.2)       | 4.6 (-7.6 to 27.5)       | 6.2 (-4 to 19.8)       | 6.5 (-4.2 to 20.8)      | 5.9 (-3.7 to 19.4)     | 13.1 (-559.6 to 703)    | 2.4 (-523.7 to 520.3)  | 29.2 (-622.2 to 835.1) |
| Household air pollution from solid fuels | Deaths      | Deaths              | 1 (0.4 to 2.1)            | 1.4 (0.6 to 2.7)          | 0.6 (0.2 to 1.4)         | 0 (0 to 0)             | 0 (0 to 0)              | 0 (0 to 0)             | -99.3 (-99.7 to -98.1)  | -99.3 (-99.7 to -98.2) | -99.1 (-99.7 to -97.8) |
|                                          |             | DALYs               | 22.3 (9.7 to 46.3)        | 30.2 (13.4 to 59.5)       | 14.5 (5.4 to 31.9)       | 0.2 (0.1 to 0.4)       | 0.2 (0.1 to 0.5)        | 0.1 (0 to 0.3)         | -99.3 (-99.7 to -98.1)  | -99.3 (-99.7 to -98.2) | -99.2 (-99.7 to -97.8) |
|                                          |             | YLLs                | 19.3 (8.3 to 39.2)        | 26 (11.2 to 52.6)         | 12.6 (4.6 to 27.9)       | 0.1 (0 to 0.3)         | 0.2 (0.1 to 0.4)        | 0.1 (0 to 0.2)         | -99.3 (-99.7 to -98.2)  | -99.4 (-99.8 to -98.4) | -99.2 (-99.7 to -97.9) |
|                                          |             | YLDs                | 3.1 (1.2 to 6.3)          | 4.3 (1.7 to 8.8)          | 1.9 (0.7 to 4.2)         | 0 (0 to 0.1)           | 0.1 (0 to 0.1)          | 0 (0 to 0.1)           | -98.8 (-99.6 to -97)    | -98.8 (-99.6 to -97)   | -98.8 (-99.6 to -97)   |
| Kidney dysfunction                       | Deaths      | Deaths              | 13.4 (9 to 17.9)          | 17.3 (11.1 to 23.7)       | 9.3 (6.1 to 12.7)        | 8.8 (5.3 to 12.3)      | 9.9 (5.5 to 14.2)       | 7.9 (4.6 to 11.5)      | -34.2 (-50.6 to -18.3)  | -43.1 (-58.8 to -24.2) | -15.4 (-41.2 to 14.6)  |
|                                          |             | DALYs               | 283.1 (211 to 359.7)      | 365.2 (266.9 to 470.6)    | 199.1 (139.4 to 258.2)   | 187.6 (135.7 to 240)   | 211.2 (144.4 to 277.2)  | 165.8 (113.9 to 225.7) | -33.7 (-47.2 to -20.5)  | -42.2 (-55.1 to -26.3) | -16.7 (-37.6 to 8.6)   |
|                                          |             | YLLs                | 245.7 (181.1 to 317.3)    | 315.5 (227.1 to 410.2)    | 174.1 (120 to 227.6)     | 150.6 (103.9 to 196.1) | 164.7 (108.3 to 221.8)  | 137.6 (87.7 to 192.9)  | -38.7 (-53.1 to -23.8)  | -47.8 (-61.9 to -30)   | -21 (-45.3 to 7.4)     |
|                                          |             | YLDs                | 37.4 (25.6 to 50.6)       | 49.8 (34.1 to 67.2)       | 25 (17 to 33.9)          | 36.9 (24.9 to 50.6)    | 46.5 (31.6 to 63.6)     | 28.2 (18.8 to 39.2)    | -1.1 (-10.3 to 8)       | -6.6 (-15.7 to 3)      | 13 (-3.1 to 29.1)      |
| Lead exposure                            | Deaths      | Deaths              | 5 (2.4 to 8.1)            | 5.1 (2 to 8.6)            | 5 (2.6 to 7.8)           | 2.3 (1 to 3.8)         | 2.1 (0.8 to 3.9)        | 2.5 (1.2 to 4.1)       | -54.5 (-65.3 to -43.9)  | -58.8 (-70.5 to -44.9) | -50.3 (-64.2 to -33)   |
|                                          |             | DALYs               | 105.6 (49.2 to 167.5)     | 104 (39.4 to 175.1)       | 106.9 (55.4 to 166.6)    | 41.4 (16.9 to 70)      | 37 (11.7 to 67.3)       | 45.6 (20.1 to 75.3)    | -60.7 (-71 to -51.7)    | -64.5 (-75.4 to -53.5) | -57.3 (-69.3 to -44.4) |
|                                          |             | YLLs                | 92.5 (42.9 to 146.4)      | 90.7 (34.5 to 153.6)      | 94 (48.4 to 149.4)       | 34.4 (14.3 to 58.3)    | 29.9 (9.6 to 55.3)      | 38.6 (17.4 to 64.4)    | -62.8 (-72.7 to -53)    | -67.1 (-77.7 to -55.7) | -59 (-71.8 to -44.6)   |
|                                          |             | YLDs                | 13.1 (5.4 to 22.6)        | 13.3 (4.5 to 24)          | 12.9 (6.1 to 21.7)       | 7 (2.4 to 13.2)        | 7.1 (1.8 to 14)         | 7 (2.8 to 12.8)        | -46.2 (-59.1 to -37.6)  | -46.7 (-64 to -37.4)   | -45.5 (-59.6 to -35)   |
| Low physical activity                    | Deaths      | Deaths              | 7.9 (1.7 to 18.4)         | 9.9 (2.3 to 22.6)         | 5.9 (1 to 14.4)          | 4.9 (1.1 to 10.6)      | 5.7 (1.3 to 12.6)       | 4.2 (0.8 to 9.4)       | -38 (-52.5 to -17.1)    | -42.1 (-57.3 to -18.3) | -28.6 (-49.5 to 5.7)   |
|                                          |             | DALYs               | 118.9 (23.8 to 298.4)     | 147 (32.1 to 356)         | 90.2 (13.8 to 236)       | 75 (15.3 to 171.4)     | 87.2 (19 to 201.8)      | 64.2 (11.1 to 153.8)   | -36.9 (-51.2 to -17.5)  | -40.7 (-54.8 to -20.1) | -28.8 (-48.1 to 2.2)   |
|                                          |             | YLLs                | 102.4 (21.1 to 255.1)     | 126.3 (28 to 300.2)       | 78.1 (12 to 204.1)       | 60.2 (12.3 to 138.4)   | 68.4 (15 to 156.6)      | 53.1 (9.4 to 128.2)    | -41.2 (-56.1 to -20.9)  | -45.9 (-60 to -23.4)   | -32 (-52.8 to 0.8)     |
|                                          |             | YLDs                | 16.4 (2.8 to 43.3)        | 20.7 (3.7 to 53.5)        | 12.1 (1.7 to 32.7)       | 14.8 (2.7 to 37.5)     | 18.8 (3.8 to 45.9)      | 11.2 (1.8 to 29.8)     | -10 (-22.4 to 13.1)     | -9.3 (-23.6 to 15.1)   | -7.9 (-24.9 to 23)     |
| Low temperature                          | Deaths      | Deaths              | 9.5 (2.3 to 18.2)         | 11.3 (2.8 to 21.9)        | 7.7 (1.9 to 14.6)        | 4.8 (1.1 to 9.1)       | 5.2 (1.3 to 9.8)        | 4.3 (1.1 to 8.4)       | -50.1 (-61.2 to -37.7)  | -53.6 (-64.7 to -38.5) | -43.7 (-58.9 to -25.5) |
|                                          |             | YLLs                | 159.9 (39.5 to 305.4)     | 186 (45.5 to 357.3)       | 133.7 (33.2 to 255.4)    | 73 (17.3 to 141)       | 76.9 (18.9 to 144.5)    | 69.5 (17 to 132.3)     | -54.4 (-64.8 to -42.3)  | -58.6 (-68.9 to -44.8) | -48 (-62.8 to -29.5)   |
| Secondhand smoke                         | Deaths      | Deaths              | 6.3 (4.5 to 8.3)          | 8.5 (5.9 to 11.3)         | 4.2 (2.7 to 5.7)         | 2.4 (1.7 to 3.2)       | 3 (2.1 to 4.1)          | 1.9 (1.2 to 2.7)       | -62 (-70.2 to -52.5)    | -64.6 (-73.6 to -53)   | -55.1 (-67.9 to -37.6) |
|                                          |             | DALYs               | 143.7 (102.1 to 188)      | 196.1 (137 to 258.2)      | 93.1 (59.4 to 126.3)     | 55.1 (39 to 72.3)      | 69.9 (49.6 to 93.3)     | 42.1 (27.3 to 58.6)    | -61.7 (-69 to -52.6)    | -64.4 (-72.8 to -54)   | -54.8 (-67.3 to -38.7) |
|                                          |             | YLLs                | 131.2 (91.8 to 171.7)     | 178.2 (121.9 to 236)      | 85.9 (53.8 to 117.9)     | 46.9 (32.8 to 62.5)    | 57.9 (40.1 to 78.6)     | 37.2 (23.2 to 52.8)    | -64.3 (-71.9 to -54.8)  | -67.5 (-76 to -57)     | -56.7 (-69.7 to -39.6) |
|                                          |             | YLDs                | 12.5 (8 to 17)            | 18 (11.5 to 24.5)         | 7.3 (4.7 to 10.2)        | 8.2 (5.3 to 11.4)      | 12 (7.8 to 16.5)        | 4.9 (3.1 to 7.1)       | -34.2 (-39.5 to -28.7)  | -33.4 (-39.7 to -26.2) | -32 (-42.1 to -21.5)   |
| Smoking                                  | Deaths      | 24.6 (19.3 to 29.8) | 16.4 (11.6 to 21.8)       | 33 (23.2 to 40.6)         | 9.9 (7.5 to 12.2)        | 5.3 (3.9 to 7)         | 14.3 (9.9 to 18.2)      | -59.5 (-69.5 to -47.7) | -67.8 (-78.3 to -52.6)  | -56.8 (-69 to -41.9)   |                        |

| Location                    | Risk factor                          | Measure                | 1990                    |                          |                        | 2019                   |                        |                         | % Change (1990 to 2019) |                        |                        |
|-----------------------------|--------------------------------------|------------------------|-------------------------|--------------------------|------------------------|------------------------|------------------------|-------------------------|-------------------------|------------------------|------------------------|
|                             |                                      |                        | Both                    | Female                   | Male                   | Both                   | Female                 | Male                    | Both                    | Female                 | Male                   |
|                             |                                      | DALYs                  | 617.4 (491.1 to 743)    | 424.1 (310.4 to 556.6)   | 808.9 (595 to 978.1)   | 255.7 (203.2 to 307.2) | 138.1 (106.7 to 176.1) | 362.1 (272 to 452.5)    | -58.6 (-67.7 to -47.7)  | -67.4 (-76.9 to -54.5) | -55.2 (-66.4 to -41.3) |
|                             |                                      | YLLs                   | 533.4 (414.2 to 652.7)  | 362.7 (258.7 to 480.2)   | 702.9 (495.2 to 868.1) | 202.8 (154.3 to 252)   | 103.4 (76.6 to 135.1)  | 293 (208.2 to 379.9)    | -62 (-71.8 to -50)      | -71.5 (-80.5 to -58.4) | -58.3 (-70.4 to -42.9) |
|                             |                                      | YLDs                   | 84 (60.7 to 110.1)      | 61.4 (40.9 to 84.7)      | 106.1 (77 to 136.3)    | 52.9 (38.4 to 68.3)    | 34.7 (24.4 to 46.5)    | 69.2 (49.5 to 88.4)     | -37 (-44.2 to -29.3)    | -43.6 (-56 to -27.7)   | -34.8 (-42.5 to -26.7) |
| Kuwait                      | All risk factors                     | Deaths                 | 44.5 (38.1 to 49.9)     | 49.5 (40.9 to 56.9)      | 39.6 (33.7 to 44.2)    | 40.5 (32.7 to 48.4)    | 30.5 (24 to 36.8)      | 47.2 (37 to 58.2)       | -8.9 (-24 to 9.3)       | -38.3 (-49.3 to -25)   | 19.3 (-2.9 to 46.4)    |
|                             |                                      | DALYs                  | 928.7 (830.1 to 1023.3) | 1049.8 (917.6 to 1189.5) | 838.6 (747.6 to 923.2) | 831 (700 to 979)       | 645.7 (536.8 to 758.9) | 956.9 (782.2 to 1159.5) | -10.5 (-23.2 to 4.5)    | -38.5 (-47.7 to -27.6) | 14.1 (-5.4 to 37.2)    |
|                             |                                      | YLLs                   | 750 (661.6 to 827.1)    | 829.9 (709 to 951.1)     | 687.3 (607 to 762.2)   | 664.4 (544.1 to 802.6) | 462.1 (367.6 to 559.7) | 803 (633.7 to 998.5)    | -11.4 (-26.8 to 7.8)    | -44.3 (-55 to -31.1)   | 16.8 (-7.2 to 45.1)    |
|                             |                                      | YLDs                   | 178.6 (130.8 to 225)    | 219.9 (160.4 to 277.7)   | 151.3 (110.6 to 192.8) | 166.6 (121.4 to 209.6) | 183.5 (133.4 to 233.7) | 153.9 (111.4 to 193.6)  | -6.7 (-12.3 to -0.8)    | -16.5 (-22.5 to -10)   | 1.7 (-6.5 to 10.7)     |
|                             | Alcohol use                          | Deaths                 | 0 (0 to 0)              | 0 (0 to 0)               | 0 (0 to 0)             | 0 (0 to 0)             | 0 (0 to 0)             | 0 (-0.1 to 0.1)         | -                       | -                      | -                      |
|                             |                                      | DALYs                  | 0 (-0.1 to 0)           | 0 (0 to 0)               | 0 (-0.1 to 0)          | 0 (-0.9 to 1.4)        | -0.3 (-0.6 to 0)       | 0.2 (-1.3 to 2.6)       | -                       | -                      | -                      |
|                             |                                      | YLLs                   | 0 (-0.1 to 0)           | 0 (0 to 0)               | 0 (-0.1 to 0)          | 0.1 (-0.6 to 1.2)      | -0.2 (-0.4 to 0)       | 0.3 (-1 to 2.3)         | -                       | -                      | -                      |
|                             |                                      | YLDs                   | 0 (0 to 0)              | 0 (0 to 0)               | 0 (0 to 0)             | -0.1 (-0.3 to 0.1)     | -0.1 (-0.2 to 0)       | -0.1 (-0.4 to 0.3)      | -                       | -                      | -                      |
|                             | Ambient particulate matter pollution | Deaths                 | 14.9 (12.4 to 17.3)     | 16.5 (13.3 to 19.8)      | 13.4 (11.2 to 15.7)    | 13.7 (10.9 to 16.9)    | 10 (7.7 to 12.4)       | 16.2 (12.7 to 20.6)     | -7.7 (-22.6 to 11.2)    | -39.4 (-50.3 to -25.6) | 20.7 (-2.3 to 49.9)    |
|                             |                                      | DALYs                  | 356.2 (304 to 413.8)    | 404 (339.8 to 475.3)     | 323.7 (275 to 374.7)   | 321.5 (267.4 to 391)   | 247.8 (202 to 300.3)   | 371.8 (298.6 to 464.1)  | -9.7 (-22.2 to 6.4)     | -38.6 (-48 to -27.5)   | 14.9 (-4.5 to 39.3)    |
|                             |                                      | YLLs                   | 283.2 (239.7 to 326.2)  | 313.7 (258.2 to 377.2)   | 261.6 (219.3 to 304.5) | 252.1 (204.1 to 315.9) | 171.1 (132.5 to 212.4) | 308.2 (240.4 to 395.7)  | -11 (-26.8 to 9)        | -45.5 (-56.4 to -31.7) | 17.8 (-6 to 48.6)      |
|                             |                                      | YLDs                   | 72.9 (52.4 to 94.7)     | 90.2 (65.1 to 117.3)     | 62.1 (44.5 to 80.9)    | 69.4 (50 to 89)        | 76.8 (54.9 to 99.9)    | 63.7 (45.6 to 81.5)     | -4.9 (-11 to 2)         | -14.9 (-21.4 to -7.3)  | 2.4 (-6.9 to 12.3)     |
|                             | Diet high in red meat                | Deaths                 | 3.1 (1.6 to 4.2)        | 3.4 (1.7 to 4.8)         | 2.8 (1.5 to 3.9)       | 2.7 (1.4 to 3.9)       | 1.9 (0.9 to 2.8)       | 3.2 (1.7 to 4.7)        | -12.2 (-29.4 to 9.5)    | -43.4 (-56.5 to -26.5) | 14.6 (-12.7 to 47.6)   |
|                             |                                      | DALYs                  | 87 (49.1 to 116.1)      | 99.1 (56 to 134.5)       | 79.5 (45.7 to 106.6)   | 73.1 (40.2 to 101.2)   | 56.7 (31 to 78.8)      | 84.5 (45.7 to 119.9)    | -16 (-29.2 to -0.4)     | -42.8 (-53.4 to -31.3) | 6.3 (-14.6 to 31)      |
|                             |                                      | YLLs                   | 67.7 (38.4 to 90.8)     | 74.9 (42.5 to 102.3)     | 63 (35.5 to 84.4)      | 55.4 (29.9 to 78.4)    | 36.8 (19.2 to 53.2)    | 68.6 (37.3 to 98.9)     | -18.1 (-33.8 to 1.3)    | -50.8 (-63 to -37.3)   | 9 (-16.9 to 39.4)      |
|                             |                                      | YLDs                   | 19.3 (10 to 28.1)       | 24.2 (12.3 to 35.5)      | 16.5 (8.6 to 24)       | 17.6 (8.9 to 26)       | 19.8 (10.2 to 29.3)    | 15.9 (7.7 to 23.4)      | -8.7 (-17.6 to 0.7)     | -17.9 (-27.7 to -5.8)  | -3.7 (-17.3 to 10.3)   |
|                             | Diet high in sodium                  | Deaths                 | 1.5 (0.1 to 5.5)        | 1.1 (0.1 to 4.8)         | 1.8 (0.1 to 5.9)       | 1.5 (0.1 to 5.4)       | 0.7 (0.1 to 2.8)       | 2.1 (0.1 to 7.1)        | 1.9 (-42.4 to 60.2)     | -41.9 (-65.9 to 8.4)   | 18.1 (-32.4 to 88.1)   |
|                             |                                      | DALYs                  | 37.6 (2.4 to 127.8)     | 27.4 (2.3 to 115.1)      | 44 (2.1 to 137.9)      | 36.1 (2 to 120.8)      | 16.2 (1.4 to 67.2)     | 49.8 (2.4 to 157.9)     | -3.9 (-41.8 to 45.7)    | -41 (-60.4 to -3.3)    | 13.2 (-35.8 to 75.8)   |
|                             |                                      | YLLs                   | 30.1 (1.9 to 103.3)     | 21.5 (1.9 to 89.8)       | 35.7 (1.7 to 112.1)    | 29.2 (1.6 to 97.8)     | 11.3 (1 to 48.3)       | 41.5 (1.9 to 132.5)     | -3.2 (-42.1 to 51.9)    | -47.2 (-66.2 to -9)    | 16.1 (-34.6 to 83.5)   |
|                             |                                      | YLDs                   | 7.4 (0.4 to 25.6)       | 5.9 (0.4 to 24.9)        | 8.3 (0.4 to 26.4)      | 6.9 (0.4 to 23.5)      | 4.8 (0.4 to 19.6)      | 8.3 (0.4 to 26.3)       | -7.1 (-39.9 to 34.7)    | -18.6 (-42 to 26.9)    | 0.4 (-40.8 to 59.1)    |
|                             | Diet low in fiber                    | Deaths                 | 1.7 (0.4 to 3.1)        | 1.8 (0.4 to 3.5)         | 1.5 (0.3 to 2.8)       | 1 (0.2 to 2.1)         | 0.7 (0.2 to 1.6)       | 1.2 (0.3 to 2.4)        | -39.1 (-54.8 to -21)    | -59.4 (-72.4 to -44.7) | -20.5 (-45.3 to 9.9)   |
|                             |                                      | DALYs                  | 40.6 (8.3 to 74.9)      | 46.1 (9 to 87.5)         | 36.8 (7.7 to 67.5)     | 25 (5.3 to 49.1)       | 19.7 (3.9 to 39.8)     | 28.7 (6.2 to 56.9)      | -38.4 (-51.7 to -24.1)  | -57.2 (-68 to -46.8)   | -22.2 (-42.3 to -0.7)  |
|                             |                                      | YLLs                   | 31.8 (6.7 to 59)        | 35.1 (7 to 67.6)         | 29.3 (6.2 to 54.3)     | 19 (4.1 to 37.9)       | 13 (2.6 to 26.4)       | 23.3 (5 to 47)          | -40.2 (-54.6 to -23.3)  | -63 (-74.3 to -51.4)   | -20.7 (-42.7 to 4.9)   |
|                             |                                      | YLDs                   | 8.8 (1.7 to 17.1)       | 11 (2 to 21.3)           | 7.5 (1.5 to 14.6)      | 6 (1.2 to 12.2)        | 6.7 (1.2 to 14)        | 5.4 (1.1 to 11)         | -32.1 (-44.1 to -22)    | -38.7 (-52.2 to -26.5) | -28 (-43.5 to -14.6)   |
| Diet low in fruits          | Deaths                               | 1.8 (0.7 to 3.1)       | 2 (0.8 to 3.6)          | 1.6 (0.7 to 2.7)         | 1.7 (0.7 to 3)         | 1.2 (0.5 to 2.2)       | 2 (0.8 to 3.6)         | -4.7 (-23.9 to 21.2)    | -38.2 (-52.5 to -19.2)  | 26 (-5.8 to 66.5)      |                        |
|                             | DALYs                                | 47.2 (19.8 to 79.5)    | 54.6 (22.4 to 93.6)     | 42.5 (18.3 to 72.2)      | 45.3 (19 to 76.4)      | 35.6 (14.7 to 59.7)    | 52.2 (22 to 87.9)      | -4 (-20.2 to 17.1)      | -34.8 (-47.1 to -19.6)  | 22.8 (-2.8 to 54.9)    |                        |
|                             | YLLs                                 | 37.4 (16.1 to 62.7)    | 42 (17.5 to 71.7)       | 34.3 (15.1 to 58.1)      | 35 (15.5 to 59.5)      | 23.7 (10.3 to 40)      | 43 (18.8 to 74.3)      | -6.4 (-24.7 to 18.4)    | -43.5 (-56.9 to -25.9)  | 25.4 (-4.1 to 62.1)    |                        |
|                             | YLDs                                 | 9.8 (3.2 to 18.3)      | 12.5 (4.2 to 23.2)      | 8.2 (2.7 to 15)          | 10.4 (3.7 to 19)       | 11.8 (4.2 to 22.1)     | 9.2 (3.2 to 17.2)      | 5.1 (-5.7 to 23.7)      | -5.8 (-16.9 to 14.1)    | 11.7 (-3.9 to 35.5)    |                        |
| Diet low in vegetables      | Deaths                               | 0.4 (0.1 to 0.9)       | 0.4 (0.1 to 0.9)        | 0.4 (0.1 to 0.9)         | 0.2 (0.1 to 0.4)       | 0.1 (0.1 to 0.3)       | 0.3 (0.1 to 0.6)       | -51.3 (-69.3 to -16.4)  | -67.9 (-82.2 to -42.1)  | -38.4 (-64.7 to 11.5)  |                        |
|                             | DALYs                                | 8.3 (2.3 to 18.1)      | 8.4 (2.5 to 18.3)       | 8.1 (2.1 to 18.1)        | 4 (1.9 to 8.5)         | 2.8 (1.4 to 5.8)       | 4.9 (2.1 to 11)        | -51.5 (-67.1 to -16)    | -66.9 (-79.7 to -40.8)  | -39.9 (-61.2 to 10.6)  |                        |
|                             | YLLs                                 | 6.7 (1.9 to 14.8)      | 6.7 (2 to 14.5)         | 6.7 (1.7 to 15)          | 3.3 (1.5 to 6.9)       | 2 (1 to 4.2)           | 4.1 (1.8 to 9.1)       | -51.6 (-67.5 to -15.8)  | -69.9 (-82.4 to -44.7)  | -38.3 (-61 to 13)      |                        |
|                             | YLDs                                 | 1.6 (0.4 to 3.7)       | 1.8 (0.5 to 4.2)        | 1.5 (0.3 to 3.5)         | 0.8 (0.3 to 1.7)       | 0.8 (0.4 to 1.7)       | 0.8 (0.3 to 1.8)       | -51 (-65.2 to -11.4)    | -55.8 (-71.8 to -20.1)  | -46.8 (-65 to -2.1)    |                        |
| Diet low in whole grains    | Deaths                               | 1.7 (0.4 to 2.6)       | 2 (0.5 to 3)            | 1.5 (0.4 to 2.2)         | 1.5 (0.4 to 2.3)       | 1.1 (0.3 to 1.8)       | 1.7 (0.4 to 2.7)       | -14.2 (-28.9 to 2.9)    | -42.9 (-53.2 to -30.4)  | 15.1 (-8.3 to 42.9)    |                        |
|                             | DALYs                                | 40.5 (9.7 to 60.3)     | 47.5 (11.4 to 71.8)     | 35.7 (8.5 to 53.2)       | 34.2 (8.4 to 52.4)     | 28 (6.7 to 42.7)       | 38.4 (9.6 to 60.2)     | -15.5 (-26.9 to -2.2)   | -41.1 (-49.4 to -31.4)  | 7.8 (-10.5 to 30.3)    |                        |
|                             | YLLs                                 | 30 (7.3 to 44.6)       | 34.4 (8.2 to 51.9)      | 26.8 (6.5 to 39.5)       | 24.5 (6.2 to 38.3)     | 17.2 (4.2 to 27.1)     | 29.6 (7.4 to 47.2)     | -18.3 (-33.4 to 0)      | -49.9 (-59.6 to -37.8)  | 10.5 (-14.3 to 40.6)   |                        |
|                             | YLDs                                 | 10.5 (2.5 to 16.9)     | 13.1 (3.1 to 21.2)      | 8.9 (2.1 to 14.5)        | 9.7 (2.3 to 15.8)      | 10.7 (2.5 to 17.8)     | 8.9 (2.2 to 14.4)      | -7.5 (-15 to -0.1)      | -17.9 (-26.5 to -9.4)   | -0.2 (-11.1 to 11.3)   |                        |
| High body-mass index        | Deaths                               | 11 (7.1 to 15.4)       | 13.7 (9.2 to 19)        | 9.1 (5.5 to 12.9)        | 11.9 (7.3 to 16.8)     | 8.9 (5.5 to 12.7)      | 13.9 (8.5 to 20)       | 8.1 (-13.7 to 35.6)     | -35.1 (-50.1 to -16.7)  | 52.9 (16.7 to 99.5)    |                        |
|                             | DALYs                                | 361.4 (255.1 to 468.1) | 454.3 (329.3 to 578.6)  | 306.2 (207.2 to 404.7)   | 368.9 (255.9 to 482.7) | 301.7 (216.8 to 388)   | 416.6 (281.6 to 568.4) | 2.1 (-14.4 to 21.5)     | -33.6 (-44.9 to -19.7)  | 36 (8.7 to 68.7)       |                        |
|                             | YLLs                                 | 282.5 (196.4 to 366.6) | 345.9 (249.8 to 446.4)  | 244.5 (163.7 to 325.1)   | 281.2 (188.3 to 376.9) | 198.2 (134.4 to 262.2) | 340.8 (219.1 to 469.3) | -0.5 (-20.3 to 23.6)    | -42.7 (-56.1 to -26.7)  | 39.4 (7.6 to 78.8)     |                        |
|                             | YLDs                                 | 78.9 (49.8 to 110.3)   | 108.4 (71.4 to 148.1)   | 61.7 (36.9 to 89.7)      | 87.7 (58.2 to 119.5)   | 103.5 (70.2 to 138.8)  | 75.7 (48.8 to 105.8)   | 11.1 (1.2 to 23.5)      | -4.5 (-13.2 to 5.7)     | 22.7 (7 to 43.9)       |                        |
| High fasting plasma glucose | Deaths                               | 15.5 (8.6 to 28.8)     | 17.2 (9 to 33.2)        | 13.9 (7.8 to 25.1)       | 14.1 (8.3 to 25.4)     | 10.7 (5.8 to 21)       | 16.3 (9.5 to 29.3)     | -9.6 (-29 to 17.5)      | -37.6 (-53.2 to -17.5)  | 16.7 (-15.7 to 61.5)   |                        |
|                             | DALYs                                | 299.2 (184.1 to 488.8) | 334.6 (191.5 to 556.9)  | 271.1 (168.9 to 432.3)   | 281.1 (178.1 to 446.7) | 217.1 (131.9 to 359.4) | 324.2 (204.3 to 507.5) | -6 (-26.1 to 22.2)      | -35.1 (-50.6 to -15.9)  | 19.6 (-13.3 to 66.4)   |                        |
|                             | YLLs                                 | 244.1 (148.3 to 407.9) | 268.5 (152.4 to 462.7)  | 223.8 (138.9 to 360.1)   | 227.1 (142.7 to 366.7) | 158.7 (94.8 to 270.2)  | 273.1 (171.1 to 428.9) | -7 (-29.1 to 24.7)      | -40.9 (-56.7 to -20.6)  | 22 (-13.7 to 73.2)     |                        |
|                             | YLDs                                 | 55.1 (30.7 to 90.5)    | 66.1 (35.7 to 111.1)    | 47.3 (25.7 to 78)        | 54 (31.7 to 85.7)      | 58.4 (32.3 to 93.7)    | 51 (30.4 to 82.1)      | -1.9 (-18.8 to 21.8)    | -11.6 (-31.3 to 12.4)   | 7.9 (-16.3 to 44.4)    |                        |
| High LDL cholesterol        | Deaths                               | 8.1 (3 to 16.9)        | 9.5 (3.7 to 19.5)       | 6.6 (2.6 to 13.5)        | 7.3 (2.5 to 15.7)      | 6 (1.9 to 13.7)        | 8.2 (2.8 to 17.6)      | -9.6 (-26.7 to 7.6)     | -36.8 (-53 to -22.6)    | 23.3 (-4.2 to 53.2)    |                        |
|                             | DALYs                                | 184.3 (108.1 to 303.3) | 223.9 (132 to 376)      | 155.8 (92.5 to 256.9)    | 164 (90.3 to 282.1)    | 142.4 (77.8 to 245.3)  | 178.7 (97.4 to 309)    | -11 (-24.9 to 3.1)      | -36.4 (-47 to -25.2)    | 14.7 (-7.6 to 39.6)    |                        |

| Location                             | Risk factor                              | Measure              | 1990                   |                          |                         | 2019                   |                        |                        | % Change (1990 to 2019) |                            |                        |
|--------------------------------------|------------------------------------------|----------------------|------------------------|--------------------------|-------------------------|------------------------|------------------------|------------------------|-------------------------|----------------------------|------------------------|
|                                      |                                          |                      | Both                   | Female                   | Male                    | Both                   | Female                 | Male                   | Both                    | Female                     | Male                   |
|                                      | High systolic blood pressure             | YLLs                 | 136.6 (76.8 to 234.6)  | 162.2 (91 to 276.4)      | 116.8 (66.2 to 199.3)   | 116.9 (57.3 to 213.9)  | 88.3 (40.2 to 171)     | 136.9 (67.4 to 252.1)  | -14.4 (-32.9 to 4.4)    | -45.5 (-60.1 to -31.5)     | 17.2 (-12 to 50.9)     |
|                                      |                                          | YLDs                 | 47.7 (28.6 to 76.9)    | 61.7 (37.2 to 98.5)      | 38.9 (23.4 to 62.6)     | 47.1 (29.1 to 76)      | 54.1 (33.3 to 85.3)    | 41.8 (24.8 to 67.7)    | -1.2 (-8.8 to 7.9)      | -12.4 (-21.1 to -2.9)      | 7.3 (-5 to 20.9)       |
|                                      |                                          | Deaths               | 25.3 (19.6 to 31.7)    | 29.1 (21.5 to 37.3)      | 21.6 (16.9 to 27)       | 23 (16.8 to 29.9)      | 17.9 (12.6 to 24.4)    | 26.4 (18.7 to 35.3)    | -9.3 (-27.3 to 11.9)    | -38.4 (-53.3 to -20.6)     | 22.1 (-5.8 to 57.1)    |
|                                      |                                          | DALYs                | 533.9 (434.2 to 633.3) | 615.7 (480.6 to 756.4)   | 471.1 (381.2 to 559.5)  | 478.8 (375.2 to 590.9) | 373.9 (284.9 to 472.3) | 551.9 (423 to 698)     | -10.3 (-26.2 to 8.7)    | -39.3 (-51.5 to -23.8)     | 17.2 (-6.4 to 47.1)    |
|                                      |                                          | YLLs                 | 432 (352.3 to 512.8)   | 489.1 (375.5 to 608.2)   | 385.9 (308.9 to 462.5)  | 384.6 (295 to 488.4)   | 271.1 (197.7 to 354.5) | 463.4 (342.7 to 601)   | -11 (-29 to 11)         | -44.6 (-58.1 to -27.4)     | 20.1 (-7.2 to 56.8)    |
|                                      | High temperature                         | YLDs                 | 101.9 (71.2 to 134.4)  | 126.6 (86 to 172.9)      | 85.2 (58.4 to 114.1)    | 94.1 (66.3 to 123.3)   | 102.7 (71.9 to 138.9)  | 88.5 (62.4 to 117.1)   | -7.6 (-17.8 to 4.2)     | -18.9 (-33.1 to -2.6)      | 3.8 (-10.6 to 19.4)    |
|                                      |                                          | Deaths               | 2.3 (0.3 to 4.2)       | 2.6 (0.4 to 4.7)         | 2.1 (0.3 to 3.7)        | 2.3 (0.6 to 3.9)       | 1.7 (0.4 to 3)         | 2.7 (0.6 to 4.7)       | -1.2 (-31 to 28.1)      | -32.8 (-52.4 to -12.5)     | 28.7 (-10.4 to 69.4)   |
|                                      |                                          | YLLs                 | 38.7 (5.6 to 69.8)     | 42.6 (6.1 to 77.8)       | 35.6 (5.1 to 64.3)      | 36.8 (8.6 to 62.9)     | 25.7 (6.7 to 44.5)     | 44.4 (10.4 to 78.4)    | -4.8 (-31.4 to 22.4)    | -39.5 (-57.6 to -19.4)     | 24.7 (-13.8 to 65.6)   |
|                                      | Household air pollution from solid fuels | Deaths               | 0.2 (0.1 to 0.5)       | 0.3 (0.1 to 0.7)         | 0.2 (0.1 to 0.4)        | 0 (0 to 0)             | 0 (0 to 0)             | 0 (0 to 0)             | -97.8 (-99.2 to -94.8)  | -98.4 (-99.5 to -96.2)     | -96.9 (-98.9 to -92.6) |
|                                      |                                          | DALYs                | 5.7 (1.8 to 12.7)      | 8 (2.7 to 17.5)          | 4.2 (1.3 to 9.1)        | 0.1 (0 to 0.4)         | 0.1 (0 to 0.4)         | 0.1 (0 to 0.4)         | -97.8 (-99.2 to -94.9)  | -98.4 (-99.4 to -96.2)     | -97 (-98.9 to -93)     |
|                                      | Kidney dysfunction                       | YLLs                 | 4.5 (1.5 to 10.2)      | 6.2 (2.1 to 14)          | 3.4 (1 to 7.5)          | 0.1 (0 to 0.3)         | 0.1 (0 to 0.2)         | 0.1 (0 to 0.3)         | -97.9 (-99.2 to -94.9)  | -98.6 (-99.5 to -96.6)     | -97 (-98.9 to -92.8)   |
|                                      |                                          | YLDs                 | 1.2 (0.4 to 2.7)       | 1.8 (0.6 to 3.9)         | 0.8 (0.2 to 1.9)        | 0 (0 to 0.1)           | 0 (0 to 0.1)           | 0 (0 to 0.1)           | -97.6 (-99.1 to -94.3)  | -97.8 (-99.2 to -94.9)     | -97.4 (-99.1 to -94)   |
|                                      |                                          | Deaths               | 4.3 (2.7 to 5.9)       | 5.3 (3.3 to 7.4)         | 3.4 (2.3 to 4.5)        | 4.9 (2.9 to 6.8)       | 3.7 (2.1 to 5.5)       | 5.6 (3.5 to 7.9)       | 13.9 (-8.4 to 40.4)     | -30.3 (-46.5 to -13.1)     | 64.2 (26.3 to 106.7)   |
|                                      | Lead exposure                            | DALYs                | 94.6 (72 to 117.6)     | 123.4 (92.6 to 155.3)    | 75.4 (58.3 to 92.8)     | 104.4 (74.3 to 135)    | 86.3 (61.6 to 112.7)   | 116.1 (83.4 to 154.2)  | 10.3 (-7.1 to 31.3)     | -30.1 (-42.1 to -15.8)     | 54 (23.1 to 88.1)      |
|                                      |                                          | YLLs                 | 75.3 (56.4 to 95.4)    | 96.2 (70.6 to 125.4)     | 61.1 (47 to 75)         | 82.9 (57.6 to 110.3)   | 61.1 (40.3 to 83.1)    | 97.3 (67.5 to 132)     | 10.1 (-11.3 to 36.8)    | -36.5 (-50.4 to -19.8)     | 59.4 (22.1 to 101.6)   |
|                                      |                                          | YLDs                 | 19.3 (13 to 26)        | 27.2 (18.3 to 36.8)      | 14.3 (9.6 to 19.2)      | 21.4 (14.3 to 29.4)    | 25.2 (16.9 to 34.1)    | 18.8 (12.7 to 25.6)    | 11.1 (1.7 to 21.6)      | -7.5 (-16.8 to 2)          | 31.3 (15 to 48.6)      |
|                                      | Low physical activity                    | Deaths               | 1.6 (0.7 to 2.5)       | 1.4 (0.5 to 2.5)         | 1.7 (0.9 to 2.6)        | 1.4 (0.6 to 2.4)       | 0.8 (0.2 to 1.5)       | 1.8 (0.8 to 3)         | -10.9 (-27.3 to 8.9)    | -45.2 (-58.6 to -31.6)     | 7.6 (-14.9 to 34.1)    |
|                                      |                                          | DALYs                | 35.7 (16.5 to 57.3)    | 31.3 (9.7 to 55.3)       | 38.3 (19.5 to 58.4)     | 25.8 (10.3 to 44.2)    | 14.2 (3.7 to 28)       | 33.5 (14.5 to 55.8)    | -27.7 (-43.4 to -12.5)  | -54.6 (-68.2 to -44.8)     | -12.5 (-33.3 to 9.2)   |
|                                      |                                          | YLLs                 | 28.8 (13.3 to 45.8)    | 24.8 (7.8 to 43.9)       | 31.3 (16 to 47.7)       | 21.4 (8.7 to 36.5)     | 10.7 (2.8 to 21.2)     | 28.6 (12.1 to 47.8)    | -25.7 (-42.1 to -8.2)   | -56.9 (-69.9 to -45.6)     | -8.8 (-32.2 to 16.3)   |
|                                      | Low temperature                          | YLDs                 | 6.8 (2.7 to 11.8)      | 6.5 (1.8 to 12.4)        | 7 (3 to 11.5)           | 4.4 (1.4 to 8.3)       | 3.5 (0.7 to 7.5)       | 4.9 (1.8 to 8.9)       | -36.1 (-52.8 to -25.5)  | -45.8 (-66.5 to -34.8)     | -29.5 (-47.4 to -17.1) |
|                                      |                                          | Deaths               | 4.3 (1.1 to 8.2)       | 5.2 (1.4 to 9.6)         | 3.3 (0.7 to 6.6)        | 3.9 (1 to 7.5)         | 3.4 (0.9 to 6.2)       | 4.2 (1 to 8.3)         | -9.3 (-25.2 to 10.1)    | -33.6 (-46.3 to -15.4)     | 25.6 (-0.5 to 61)      |
|                                      |                                          | DALYs                | 69.7 (15.8 to 146)     | 87.1 (22.3 to 177.4)     | 55.3 (10.4 to 119.7)    | 64 (14.5 to 129.7)     | 58.7 (14.9 to 112.8)   | 67.5 (14.1 to 142.6)   | -8.2 (-22.2 to 9.2)     | -32.6 (-43 to -15.4)       | 22 (-1.2 to 57.3)      |
|                                      | Secondhand smoke                         | YLLs                 | 55.4 (13.1 to 111.8)   | 68.1 (17.4 to 136.1)     | 44.2 (8.5 to 94.2)      | 49.8 (11.8 to 100.1)   | 41.7 (11.3 to 78.1)    | 55.2 (11.9 to 114.2)   | -10.1 (-26.7 to 11.4)   | -38.8 (-51 to -19.2)       | 24.8 (-2.3 to 64)      |
|                                      |                                          | YLDs                 | 14.4 (3 to 31.9)       | 19.1 (4.2 to 42.6)       | 11 (1.7 to 25.9)        | 14.2 (2.9 to 32.1)     | 17 (3.6 to 37)         | 12.2 (2.1 to 28.6)     | -0.8 (-10.9 to 11.7)    | -10.7 (-21 to 5.1)         | 11 (-2.3 to 34.4)      |
|                                      |                                          | Deaths               | 2 (-1.6 to 5.4)        | 2.3 (-1.8 to 6.1)        | 1.8 (-1.4 to 4.8)       | 2 (-1.6 to 5.4)        | 1.5 (-1.2 to 4)        | 2.3 (-1.9 to 6.3)      | -2 (-47 to 62.2)        | -33.4 (-63 to 9.3)         | 28 (-32.2 to 109.5)    |
|                                      | Smoking                                  | YLLs                 | 34 (-26.5 to 89.2)     | 37.5 (-29.4 to 100.7)    | 31.2 (-24.9 to 82.6)    | 32.1 (-26 to 87.7)     | 22.4 (-18.1 to 60)     | 38.8 (-32.2 to 106.7)  | -5.5 (-49 to 52.8)      | -40.1 (-66.5 to -2.9)      | 24.1 (-34.6 to 96.8)   |
|                                      |                                          | Deaths               | 1.8 (1.3 to 2.3)       | 2.4 (1.8 to 3.2)         | 1.3 (1 to 1.7)          | 1.5 (1 to 2)           | 1.4 (1 to 1.9)         | 1.5 (1.1 to 2.1)       | -17.3 (-33.5 to 1)      | -43.3 (-55.9 to -27.2)     | 17.6 (-10.1 to 50.6)   |
| DALYs                                |                                          | 42.3 (31.8 to 54.3)  | 62.6 (46.7 to 80.4)    | 30 (22.1 to 38.9)        | 34.8 (25.3 to 45.4)     | 35.4 (25.6 to 46.1)    | 34 (23.3 to 46.1)      | -17.8 (-31.8 to -1.1)  | -43.4 (-54.6 to -30)    | 13.4 (-12.6 to 45.6)       |                        |
| Ambient particulate matter pollution | YLLs                                     | 36.5 (27.4 to 47)    | 53.1 (39.1 to 69.2)    | 26.4 (19.3 to 34.6)      | 29.2 (20.8 to 38.8)     | 27.2 (19.1 to 36.4)    | 30.4 (20.6 to 42.1)    | -20.1 (-36.2 to -1.2)  | -48.7 (-60.9 to -33.9)  | 15.1 (-13.2 to 49.6)       |                        |
|                                      | YLDs                                     | 5.8 (3.8 to 7.9)     | 9.6 (6.3 to 13.1)      | 3.6 (2.3 to 5.1)         | 5.6 (3.7 to 7.7)        | 8.2 (5.4 to 11.3)      | 3.6 (2.3 to 5.1)       | -2.9 (-12.1 to 7.4)    | -14.1 (-23.2 to -3.8)   | 0.8 (-15.4 to 20.6)        |                        |
|                                      | Deaths                                   | 6.1 (5.2 to 7.1)     | 2.8 (1.9 to 3.9)       | 8.5 (7.3 to 9.8)         | 5.4 (4.3 to 6.8)        | 1.1 (0.7 to 1.5)       | 8.3 (6.5 to 10.5)      | -11.2 (-30.5 to 12.7)  | -61.5 (-74.6 to -38.5)  | -2.4 (-24.4 to 24.2)       |                        |
| Diet high in red meat                | DALYs                                    | 178.2 (154 to 204.4) | 79.2 (55.9 to 108)     | 239 (208.1 to 272)       | 144.9 (117.3 to 176.4)  | 32.8 (23.8 to 44.5)    | 223.1 (177.8 to 274.3) | -18.7 (-34.1 to 0.3)   | -58.5 (-71.3 to -37.2)  | -6.7 (-24.1 to 14.6)       |                        |
|                                      | YLLs                                     | 141.4 (121 to 161.7) | 61 (42.2 to 84.7)      | 191.3 (164.3 to 218.8)   | 117 (91.1 to 147.3)     | 22.1 (15.6 to 30.7)    | 182.9 (139.4 to 231.9) | -17.2 (-36.3 to 6.4)   | -63.8 (-75.8 to -42.6)  | -4.4 (-25.9 to 22.6)       |                        |
|                                      | YLDs                                     | 36.8 (26.1 to 47.7)  | 18.1 (11.4 to 26.4)    | 47.7 (34.4 to 62)        | 27.9 (19.9 to 35.8)     | 10.7 (7 to 15.2)       | 40.2 (28.5 to 51.4)    | -24.2 (-33.8 to -13.7) | -40.8 (-58.4 to -16.2)  | -15.7 (-26.2 to -4.4)      |                        |
| Lebanon                              | All risk factors                         | Deaths               | 46.7 (38.3 to 56.3)    | 50.2 (39.7 to 62.5)      | 42.2 (34.1 to 51.9)     | 29.8 (20.8 to 38.6)    | 29 (19.3 to 38.4)      | 30.6 (20.6 to 41.5)    | -36.2 (-54 to -15)      | -42.2 (-58.6 to -19.2)     | -27.6 (-52.4 to 1.2)   |
|                                      |                                          | DALYs                | 942 (802 to 1109.7)    | 1036.6 (865.6 to 1242.9) | 836.4 (695.2 to 1006.2) | 660.8 (511.1 to 818.3) | 677.3 (523.4 to 845.6) | 639.8 (470.7 to 829.1) | -29.8 (-45.1 to -11.7)  | -34.7 (-49.4 to -16.3)     | -23.5 (-44.1 to 0.8)   |
|                                      |                                          | YLLs                 | 758 (634.1 to 923.9)   | 803.8 (650.4 to 1005.9)  | 703.5 (573.4 to 875.9)  | 463.6 (324.1 to 607.7) | 439.3 (294.7 to 589.9) | 491.4 (331.8 to 677.5) | -38.8 (-57 to -16.7)    | -45.3 (-62.1 to -22.6)     | -30.1 (-55.4 to -1.7)  |
|                                      |                                          | YLDs                 | 184 (133.3 to 233.5)   | 232.8 (169.2 to 297.8)   | 132.9 (95.3 to 167.8)   | 197.2 (145.7 to 249)   | 238 (173.4 to 302.2)   | 148.4 (108.9 to 188.7) | 7.2 (1.3 to 13.6)       | 2.2 (-5.4 to 10.2)         | 11.7 (3.3 to 20.5)     |
|                                      | Alcohol use                              | Deaths               | 0.7 (0.4 to 1.1)       | 0.2 (-0.1 to 0.4)        | 1.4 (0.9 to 2)          | 0.2 (0 to 0.3)         | -0.1 (-0.1 to 0)       | 0.4 (0.2 to 0.7)       | -79 (-95 to -59.8)      | -134.6 (-567.4 to 714.2)   | -70.1 (-86.4 to -49.1) |
|                                      |                                          | DALYs                | 19.7 (12.4 to 28.3)    | 4.1 (-0.5 to 10.3)       | 35.9 (23.5 to 52.2)     | 4.9 (1.5 to 9.5)       | -1 (-3.1 to 1)         | 12.1 (5.4 to 20.9)     | -75 (-91 to -56.5)      | -125.2 (-628.7 to 289.9)   | -66.4 (-82.2 to -47.1) |
|                                      |                                          | YLLs                 | 17.1 (10.9 to 24.7)    | 3.9 (0 to 9)             | 31 (19.9 to 45.9)       | 4 (1.4 to 7.7)         | -0.5 (-1.9 to 0.9)     | 9.3 (4 to 17.2)        | -76.8 (-91.1 to -58.5)  | -113.2 (-347.3 to -51.8)   | -69.8 (-84.8 to -49.6) |
|                                      | Ambient particulate matter pollution     | YLDs                 | 2.5 (1.2 to 4)         | 0.3 (-0.8 to 1.5)        | 4.9 (2.6 to 7.5)        | 0.9 (0.1 to 2)         | -0.5 (-1.3 to 0.2)     | 2.7 (1.1 to 4.6)       | -62.5 (-94.8 to -35.7)  | -301.2 (-2389.7 to 1606.9) | -44.3 (-69.4 to -21.5) |
|                                      |                                          | Deaths               | 8.2 (5.8 to 11)        | 8.5 (5.7 to 11.7)        | 7.8 (5.4 to 10.5)       | 6.3 (4 to 8.5)         | 6.1 (4 to 8.6)         | 6.5 (3.8 to 9.4)       | -23.7 (-46.8 to 7.8)    | -29 (-52.4 to 8.2)         | -16.8 (-44.5 to 20.3)  |
|                                      |                                          | DALYs                | 194.1 (137.7 to 257.2) | 208.2 (145.9 to 281.2)   | 178.5 (126.1 to 241.7)  | 165.6 (115.7 to 215.5) | 170.9 (117.1 to 227.7) | 159.1 (103.9 to 219.9) | -14.7 (-35.1 to 15.8)   | -17.9 (-39.7 to 16.6)      | -10.9 (-36.3 to 22.6)  |
|                                      | Diet high in red meat                    | YLLs                 | 153.1 (107.1 to 205.8) | 157.6 (107.8 to 219.6)   | 147.6 (101.9 to 202.1)  | 112.1 (70 to 155.3)    | 106 (67.7 to 152)      | 119 (71.3 to 175.2)    | -26.8 (-50.6 to 4.7)    | -32.7 (-56.4 to 3.8)       | -19.4 (-48.8 to 18.5)  |
|                                      |                                          | YLDs                 | 41 (26 to 57.4)        | 50.7 (31.5 to 72.7)      | 30.9 (19.8 to 43.1)     | 53.6 (36.6 to 71.6)    | 64.9 (43.9 to 87)      | 40.1 (27.1 to 53.8)    | 30.7 (13.2 to 62.1)     | 28.1 (8.3 to 64.1)         | 29.6 (12.2 to 59.9)    |
|                                      |                                          | Deaths               | 2.1 (0.8 to 3.2)       | 2.2 (0.9 to 3.5)         | 1.9 (0.8 to 3)          | 1.4 (0.5 to 2.2)       | 1.3 (0.5 to 2.2)       | 1.4 (0.5 to 2.4)       | -32.9 (-58 to -3)       | -39.5 (-63.6 to -6.8)      | -23.8 (-56.1 to 18.5)  |
|                                      |                                          | DALYs                | 54.8 (23.6 to 82.5)    | 61 (25.2 to 92.8)        | 48.1 (20.1 to 74.1)     | 43.3 (17.1 to 65.9)    | 45 (18.3 to 69.2)      | 41.3 (16.2 to 65.3)    | -20.9 (-45.3 to 13.4)   | -26.2 (-49.7 to 7.6)       | -14 (-43.4 to 26)      |
|                                      |                                          | YLLs                 | 42.4 (17.8 to 65.1)    | 45.2 (18.5 to 70)        | 39.1 (16.4 to 61.6)     | 28.2 (10.6 to 45.6)    | 26.7 (9.4 to 44.9)     | 30 (11.4 to 50.2)      | -33.4 (-59.6 to 2.2)    | -41 (-65.3 to -3)          | -23.3 (-54.6 to 23.7)  |

| Location                                 | Risk factor | Measure | 1990                   |                        |                        | 2019                   |                        |                        | % Change (1990 to 2019) |                         |                           |
|------------------------------------------|-------------|---------|------------------------|------------------------|------------------------|------------------------|------------------------|------------------------|-------------------------|-------------------------|---------------------------|
|                                          |             |         | Both                   | Female                 | Male                   | Both                   | Female                 | Male                   | Both                    | Female                  | Male                      |
| Diet high in sodium                      | Deaths      | YLDs    | 12.4 (4.4 to 19.7)     | 15.7 (5.6 to 25)       | 9 (3.2 to 14.1)        | 15.1 (5.8 to 23.5)     | 18.3 (6.8 to 28.3)     | 11.3 (4.4 to 17.8)     | 21.5 (7.4 to 47.4)      | 16.4 (0.5 to 42.9)      | 26.3 (9.2 to 58)          |
|                                          |             | Deaths  | 0.8 (0.2 to 3.4)       | 0.6 (0.2 to 2.6)       | 1 (0.1 to 4.3)         | 0.5 (0.1 to 2.1)       | 0.3 (0.1 to 1.4)       | 0.7 (0.1 to 2.9)       | -39.2 (-69.4 to 8.5)    | -48.2 (-76.2 to 0.2)    | -30.5 (-69 to 65.4)       |
|                                          |             | DALYs   | 19.6 (2.9 to 79.8)     | 15.5 (3.2 to 64.7)     | 23.8 (2 to 96.5)       | 13.2 (1.9 to 54.9)     | 9.2 (2 to 38.8)        | 17.9 (1.4 to 71.6)     | -32.5 (-60.3 to 16.9)   | -40.5 (-68.9 to 25.4)   | -24.6 (-59.5 to 61.9)     |
| Diet low in fiber                        | Deaths      | YLLs    | 15.7 (2.3 to 65)       | 11.8 (2.5 to 49.6)     | 19.8 (1.6 to 80.3)     | 9.3 (1.3 to 38.7)      | 5.8 (1.2 to 25.2)      | 13.4 (1 to 53.3)       | -41 (-68 to 4.4)        | -51 (-76.9 to 4.8)      | -32.2 (-65.5 to 58.6)     |
|                                          |             | YLDs    | 3.9 (0.5 to 15.8)      | 3.7 (0.7 to 15.8)      | 4.1 (0.3 to 16.1)      | 3.9 (0.5 to 15.8)      | 3.4 (0.6 to 14.3)      | 4.5 (0.3 to 17.6)      | 2.1 (-37.2 to 81.9)     | -6.8 (-51.6 to 114.6)   | 12.1 (-30.3 to 130)       |
|                                          |             | Deaths  | 0.4 (0.1 to 0.9)       | 0.4 (0.1 to 1)         | 0.4 (0.1 to 0.9)       | 0.3 (0.1 to 0.7)       | 0.3 (0.1 to 0.7)       | 0.3 (0.1 to 0.8)       | -25.2 (-55.6 to 15.9)   | -31.5 (-65.2 to 20.8)   | -16.2 (-56.2 to 47.8)     |
| Diet low in fruits                       | Deaths      | DALYs   | 7.8 (2.7 to 16.6)      | 8.2 (2.9 to 17.4)      | 7.3 (2.4 to 16.3)      | 7.7 (2.1 to 17.2)      | 7.7 (2 to 17.9)        | 7.6 (2 to 18.5)        | -1.3 (-33.5 to 36.2)    | -5.6 (-42.4 to 39.4)    | 4.6 (-34.8 to 59.2)       |
|                                          |             | YLLs    | 6.2 (2.2 to 13.6)      | 6.4 (2.2 to 14)        | 6.1 (2 to 13.2)        | 5.2 (1.4 to 11.8)      | 4.8 (1.2 to 10.9)      | 5.7 (1.4 to 14.1)      | -17 (-49.6 to 21.9)     | -25.1 (-59.6 to 19.2)   | -6.6 (-48.8 to 49.5)      |
|                                          |             | YLDs    | 1.5 (0.5 to 3.5)       | 1.8 (0.6 to 4.2)       | 1.2 (0.4 to 2.8)       | 2.5 (0.6 to 5.9)       | 3 (0.7 to 7.4)         | 2 (0.5 to 4.6)         | 62.5 (15.1 to 102)      | 62.7 (6.7 to 122.6)     | 60 (13.1 to 111.9)        |
| Diet low in vegetables                   | Deaths      | Deaths  | 0.4 (0.2 to 0.7)       | 0.5 (0.2 to 1)         | 0.3 (0.2 to 0.6)       | 0.4 (0.2 to 0.8)       | 0.5 (0.2 to 0.9)       | 0.4 (0.2 to 0.8)       | 5.3 (-44.4 to 94.4)     | -6.9 (-54.2 to 101.1)   | 26.9 (-47 to 208.8)       |
|                                          |             | DALYs   | 9.2 (5.3 to 14.4)      | 11.4 (6.4 to 18.3)     | 6.6 (3.8 to 11.1)      | 14.4 (6 to 25.8)       | 15.8 (6.4 to 29)       | 12.7 (5.2 to 23.6)     | 57 (-9.1 to 153.1)      | 38.7 (-21.2 to 136.5)   | 91.4 (-0.7 to 240.6)      |
|                                          |             | YLLs    | 7.3 (4.2 to 11.5)      | 8.8 (4.8 to 14.3)      | 5.5 (3.1 to 9.4)       | 9.4 (3.8 to 17.1)      | 9.4 (3.5 to 18.1)      | 9.2 (3.7 to 18.2)      | 28.9 (-30.1 to 122.7)   | 7.4 (-47.1 to 100.6)    | 67.2 (-19 to 217.5)       |
| Diet low in whole grains                 | Deaths      | YLDs    | 1.9 (0.9 to 3.3)       | 2.6 (1.2 to 4.6)       | 1.1 (0.6 to 2)         | 5 (1.7 to 9.2)         | 6.4 (2.2 to 12.2)      | 3.5 (1.2 to 6.7)       | 164 (73 to 273.4)       | 143.8 (55.5 to 274.4)   | 209.9 (86.3 to 383.6)     |
|                                          |             | Deaths  | 0.1 (0.1 to 0.2)       | 0.2 (0.1 to 0.3)       | 0.1 (0.1 to 0.2)       | 0.1 (0.1 to 0.2)       | 0.1 (0.1 to 0.2)       | 0.1 (0.1 to 0.2)       | -36.3 (-62.4 to 0.8)    | -42.6 (-71.3 to 4.8)    | -27.4 (-66.8 to 30.3)     |
|                                          |             | DALYs   | 2.5 (2 to 3.4)         | 2.8 (2.2 to 3.9)       | 2.2 (1.7 to 3.3)       | 1.8 (1.3 to 2.5)       | 1.8 (1.2 to 2.6)       | 1.7 (1.2 to 2.8)       | -30 (-51.8 to -2.5)     | -35.9 (-57.1 to -7.6)   | -21.9 (-52 to 18.1)       |
| High body-mass index                     | Deaths      | YLLs    | 2.1 (1.6 to 2.9)       | 2.2 (1.6 to 3.2)       | 1.9 (1.4 to 2.9)       | 1.3 (0.8 to 1.9)       | 1.2 (0.8 to 1.9)       | 1.4 (0.8 to 2.3)       | -38.1 (-60.2 to -8.8)   | -45.4 (-68.8 to -13.3)  | -28.2 (-61.5 to 12)       |
|                                          |             | YLDs    | 0.4 (0.3 to 0.6)       | 0.6 (0.4 to 0.7)       | 0.3 (0.2 to 0.4)       | 0.5 (0.3 to 0.6)       | 0.6 (0.4 to 0.8)       | 0.4 (0.3 to 0.5)       | 7.4 (-5 to 31.1)        | 0.7 (-13.5 to 26.7)     | 15.6 (-3.2 to 55.5)       |
|                                          |             | Deaths  | 3.2 (1.9 to 4.2)       | 3.4 (2.1 to 4.7)       | 2.9 (1.7 to 4)         | 2.4 (1.3 to 3.5)       | 2.4 (1.2 to 3.5)       | 2.5 (1.2 to 3.9)       | -23.8 (-47.2 to 0.4)    | -31.2 (-52.1 to -4.3)   | -12.9 (-42.9 to 20.6)     |
| High fasting plasma glucose              | Deaths      | DALYs   | 64.2 (36.7 to 86.5)    | 71.3 (40.9 to 95.7)    | 56.3 (30.9 to 78.2)    | 56.5 (30.5 to 79.8)    | 58.4 (30.3 to 83.4)    | 54.2 (28.2 to 80.5)    | -12 (-31.9 to 7.9)      | -18.2 (-36.4 to 3.1)    | -3.6 (-32.4 to 25.1)      |
|                                          |             | YLLs    | 46.4 (26.8 to 62.8)    | 48.8 (28.2 to 67.6)    | 43.4 (24.6 to 61.4)    | 37.2 (17.5 to 55.1)    | 35 (16 to 53.1)        | 39.8 (19.3 to 62)      | -19.9 (-46.2 to 7)      | -28.3 (-52 to 1.9)      | -8.4 (-44.6 to 30.1)      |
|                                          |             | YLDs    | 17.8 (9.2 to 26)       | 22.5 (11.5 to 32.8)    | 12.9 (6.6 to 19)       | 19.3 (9.9 to 28.1)     | 23.4 (11.8 to 34.2)    | 14.5 (7.5 to 21.1)     | 8.4 (2 to 15.3)         | 3.7 (-4.2 to 12.7)      | 12.4 (2.5 to 23.8)        |
| High LDL cholesterol                     | Deaths      | Deaths  | 9.1 (5.3 to 13.8)      | 10.9 (6.4 to 16.4)     | 7.2 (3.8 to 11.5)      | 6.7 (3.6 to 11.1)      | 6.8 (3.5 to 11.3)      | 6.5 (3.4 to 11)        | -26.8 (-49.6 to 3.7)    | -37.8 (-59 to -7.9)     | -9 (-45.1 to 39.3)        |
|                                          |             | DALYs   | 302.2 (192 to 434.9)   | 369.8 (236.1 to 522)   | 231.4 (132.9 to 352)   | 246.6 (159.2 to 364.3) | 268.1 (173.5 to 385.9) | 220.8 (133.2 to 339.5) | -18.4 (-38 to 7)        | -27.5 (-44.9 to -4.2)   | -4.6 (-32.9 to 33)        |
|                                          |             | YLLs    | 232.8 (142.3 to 332.4) | 274.5 (170 to 392.1)   | 188.4 (105.6 to 293.4) | 158.7 (88.9 to 248.2)  | 157.4 (84 to 254.5)    | 159.5 (87.7 to 263.1)  | -31.9 (-53.1 to -1.5)   | -42.7 (-62.5 to -13)    | -15.4 (-47.6 to 27.1)     |
| High systolic blood pressure             | Deaths      | YLDs    | 69.4 (41.4 to 103.5)   | 95.3 (57.5 to 140)     | 42.9 (23.5 to 67.2)    | 87.9 (55.6 to 125)     | 110.7 (70.9 to 153.8)  | 61.3 (37.1 to 89.1)    | 26.7 (12.7 to 48.2)     | 16.2 (3.2 to 34.9)      | 42.8 (22.8 to 79.5)       |
|                                          |             | Deaths  | 12.2 (6.4 to 25)       | 12.5 (6.4 to 26.9)     | 11.8 (6 to 23.4)       | 11.2 (5 to 22.6)       | 10.7 (4.6 to 21.6)     | 11.8 (4.9 to 25.4)     | -8.2 (-40.3 to 34.3)    | -14.2 (-46.5 to 36.6)   | 0.1 (-42.8 to 64.6)       |
|                                          |             | DALYs   | 218.2 (127.4 to 386.4) | 225.9 (129.7 to 407)   | 208.7 (119.1 to 365.9) | 234.3 (122.7 to 400.6) | 232.6 (124.2 to 399.7) | 235.8 (119.5 to 412.5) | 7.4 (-25.7 to 51.7)     | 3 (-29.8 to 52.9)       | 13 (-26.9 to 77.6)        |
| High temperature                         | Deaths      | YLLs    | 179.1 (102.9 to 326.4) | 178.8 (99.9 to 328.7)  | 178 (100.8 to 319.7)   | 167.2 (81.2 to 293.4)  | 153.9 (74.4 to 269.2)  | 182.8 (82.8 to 337.9)  | -6.7 (-39.9 to 37.2)    | -13.9 (-46.7 to 37.9)   | 2.7 (-41.1 to 67.8)       |
|                                          |             | YLDs    | 39.1 (21.5 to 68.8)    | 47.1 (25.1 to 83.7)    | 30.6 (16.1 to 51.8)    | 67.1 (36 to 113.2)     | 78.7 (41.8 to 135.4)   | 53 (28.9 to 90)        | 71.7 (35.8 to 126.2)    | 67.2 (26.6 to 127.3)    | 73.1 (28.6 to 142.4)      |
|                                          |             | Deaths  | 8.1 (2.4 to 18.8)      | 9.1 (2.6 to 22)        | 6.8 (2.2 to 15.4)      | 6.6 (2 to 14)          | 6.6 (1.8 to 14.5)      | 6.5 (2 to 14.5)        | -18.3 (-44.9 to 13.1)   | -27.1 (-49.4 to 6.2)    | -3.8 (-39.1 to 38.8)      |
| Household air pollution from solid fuels | Deaths      | DALYs   | 170.4 (91.4 to 306.9)  | 196.6 (101.2 to 363.2) | 141 (75.1 to 255)      | 162.5 (86.2 to 271.8)  | 172 (90.1 to 289.5)    | 150.8 (79.2 to 269.5)  | -4.6 (-25.1 to 21)      | -12.5 (-31.3 to 14.4)   | 6.9 (-24.2 to 42.4)       |
|                                          |             | YLLs    | 119.7 (56.6 to 237.2)  | 130.8 (56.4 to 275.6)  | 106 (51.2 to 204.9)    | 104.2 (45.2 to 190.4)  | 100.5 (42.1 to 192.5)  | 108.2 (47.1 to 209.3)  | -12.9 (-42.1 to 24.4)   | -23.2 (-49.8 to 16.3)   | 2.1 (-36.4 to 50.7)       |
|                                          |             | YLDs    | 50.7 (30.1 to 80.8)    | 65.7 (39 to 105.7)     | 35 (20.9 to 55.1)      | 58.3 (35 to 94)        | 71.5 (42.9 to 115.4)   | 42.6 (25.5 to 68.6)    | 15 (7.4 to 24.3)        | 8.8 (-0.7 to 19.9)      | 21.6 (8.7 to 37.3)        |
| Kidney dysfunction                       | Deaths      | Deaths  | 25.2 (18.4 to 33.9)    | 27 (18.1 to 37.7)      | 23 (16.9 to 30.9)      | 15.8 (10 to 22.3)      | 14.8 (8.7 to 21.6)     | 17 (10.3 to 24.8)      | -37.5 (-57.3 to -12)    | -45.2 (-65.6 to -15.6)  | -26.3 (-55.5 to 8.4)      |
|                                          |             | DALYs   | 539.8 (424.3 to 682.1) | 583.8 (430.1 to 757.9) | 490.8 (377.1 to 632.1) | 387.3 (281.4 to 503.4) | 381 (266.2 to 509.2)   | 393.8 (278.7 to 523.5) | -28.3 (-45.9 to -6.1)   | -34.7 (-53.2 to -9.7)   | -19.8 (-45.4 to 9.1)      |
|                                          |             | YLLs    | 433.3 (330.3 to 568.4) | 451.9 (323 to 608.4)   | 410.7 (308.2 to 545.2) | 267.9 (174 to 366.9)   | 242.5 (149.4 to 342.2) | 297.5 (187.6 to 423.9) | -38.2 (-58 to -13.8)    | -46.3 (-65.4 to -18.6)  | -27.6 (-57 to 5.8)        |
| Lead exposure                            | Deaths      | YLDs    | 106.4 (73.2 to 141.4)  | 132 (88.2 to 179.3)    | 80.1 (54.5 to 104.8)   | 119.4 (82.8 to 158.5)  | 138.5 (95.3 to 185.9)  | 96.3 (68.2 to 127.2)   | 12.2 (-1.4 to 29.7)     | 5 (-14.7 to 28.9)       | 20.2 (4.7 to 38.3)        |
|                                          |             | Deaths  | 0 (0 to 0)             | 0 (0 to 0)             | 0 (0 to 0)             | 0 (0 to 0)             | 0 (0 to 0)             | 0 (0 to 0)             | -89.6 (-975 to 1070.3)  | -89.1 (-893.3 to 892.6) | -90.6 (-1090.9 to 1367.8) |
|                                          |             | YLLs    | 0.1 (-0.1 to 0.2)      | 0.1 (-0.1 to 0.2)      | 0.1 (-0.1 to 0.2)      | 0 (-0.2 to 0.3)        | 0 (-0.2 to 0.3)        | 0 (-0.2 to 0.3)        | -89.2 (-944.4 to 995.2) | -88.8 (-868.9 to 851.8) | -90 (-1006.7 to 1328.5)   |
| High systolic blood pressure             | Deaths      | DALYs   | 2.2 (1.1 to 4)         | 2.7 (1.4 to 4.7)       | 1.6 (0.7 to 3.2)       | 0 (0 to 0)             | 0 (0 to 0.1)           | 0 (0 to 0)             | -99.1 (-99.7 to -97.8)  | -99.2 (-99.7 to -97.9)  | -99.1 (-99.7 to -97.6)    |
|                                          |             | DALYs   | 52.6 (27 to 93.4)      | 66.5 (34 to 114.4)     | 37.5 (16.8 to 70.9)    | 0.5 (0.2 to 1.3)       | 0.6 (0.2 to 1.5)       | 0.4 (0.1 to 1)         | -99 (-99.7 to -97.6)    | -99.1 (-99.7 to -97.6)  | -99 (-99.7 to -97.4)      |
|                                          |             | YLLs    | 41.2 (20.9 to 73.8)    | 50.4 (25.1 to 87.1)    | 31 (13.7 to 60.5)      | 0.3 (0.1 to 0.8)       | 0.4 (0.1 to 1)         | 0.3 (0.1 to 0.8)       | -99.2 (-99.7 to -97.9)  | -99.2 (-99.8 to -98)    | -99.1 (-99.7 to -97.6)    |
| High systolic blood pressure             | Deaths      | YLDs    | 11.4 (5.7 to 20.4)     | 16.1 (8.1 to 28.5)     | 6.5 (3 to 12.9)        | 0.2 (0.1 to 0.4)       | 0.2 (0.1 to 0.6)       | 0.1 (0 to 0.2)         | -98.5 (-99.5 to -96.2)  | -98.5 (-99.5 to -96.4)  | -98.5 (-99.5 to -96.2)    |
|                                          |             | Deaths  | 4.3 (2.7 to 5.9)       | 5 (3 to 7)             | 3.5 (2.3 to 4.8)       | 3.7 (1.7 to 5.7)       | 3.6 (1.5 to 5.8)       | 3.8 (1.8 to 6)         | -13.9 (-45.1 to 18)     | -27.1 (-56.7 to 5.4)    | 7.8 (-38 to 54.8)         |
|                                          |             | DALYs   | 91.6 (68 to 117.5)     | 109.9 (79.6 to 144.7)  | 71.9 (52.7 to 93.8)    | 90.2 (60.1 to 122.1)   | 95.7 (62.9 to 132)     | 83.6 (53.4 to 116.4)   | -1.5 (-25 to 25.7)      | -12.9 (-34.3 to 13.2)   | 16.3 (-19 to 56.2)        |
| High systolic blood pressure             | Deaths      | YLLs    | 71.8 (52.4 to 93.6)    | 82.6 (57.8 to 112.7)   | 59.8 (42.8 to 80.5)    | 61.9 (35.4 to 88.1)    | 60.2 (31.7 to 89.3)    | 63.8 (35 to 94.5)      | -13.8 (-42.4 to 19.3)   | -27.2 (-53 to 6.5)      | 6.8 (-31.2 to 53.1)       |
|                                          |             | YLDs    | 19.8 (13.5 to 26.6)    | 27.3 (18.6 to 36.9)    | 12.1 (8.3 to 16.2)     | 28.4 (19.1 to 38.4)    | 35.5 (24.2 to 48.3)    | 19.7 (13.4 to 27.1)    | 43.2 (31.6 to 55.9)     | 30.3 (19.1 to 43.9)     | 63.4 (44.2 to 82.8)       |
|                                          |             | Deaths  | 2.2 (1.1 to 3.4)       | 2 (0.9 to 3.3)         | 2.4 (1.3 to 3.7)       | 1.1 (0.5 to 2)         | 0.9 (0.3 to 1.7)       | 1.4 (0.6 to 2.5)       | -48.8 (-66.6 to -29.8)  | -55.5 (-71.8 to -35.7)  | -41 (-62.3 to -15.3)      |
| High systolic blood pressure             | Deaths      | DALYs   | 44.6 (21.8 to 68.8)    | 40.5 (17 to 67.4)      | 48.8 (26.3 to 72.8)    | 20.6 (8.1 to 37)       | 16.4 (4.9 to 32.5)     | 25.6 (11.4 to 43.9)    | -53.9 (-68.3 to -40.4)  | -59.5 (-74.7 to -45.2)  | -47.6 (-65.3 to -28.3)    |



| Location               | Risk factor                          | Measure            | 1990                      |                           |                           | 2019                      |                           |                          | % Change (1990 to 2019)    |                              |                          |
|------------------------|--------------------------------------|--------------------|---------------------------|---------------------------|---------------------------|---------------------------|---------------------------|--------------------------|----------------------------|------------------------------|--------------------------|
|                        |                                      |                    | Both                      | Female                    | Male                      | Both                      | Female                    | Male                     | Both                       | Female                       | Male                     |
| Belgium                | Low physical activity                | YLLs               | 36.3 (17.7 to 56.9)       | 31.7 (13 to 52.4)         | 41.1 (22.3 to 62.6)       | 15.3 (6 to 28)            | 11.4 (3.4 to 22.9)        | 20.2 (8.8 to 35.5)       | -57.8 (-72.9 to -42)       | -64.1 (-78.6 to -47.6)       | -50.9 (-69.8 to -28.7)   |
|                        |                                      | YLDs               | 8.3 (3.6 to 13.9)         | 8.9 (3.3 to 15.7)         | 7.7 (3.8 to 12.1)         | 5.2 (1.7 to 9.8)          | 5.1 (1.3 to 10.4)         | 5.4 (2.3 to 9.3)         | -37.1 (-54.8 to -25.2)     | -43 (-65.5 to -30)           | -29.7 (-45.5 to -16.5)   |
|                        |                                      | Deaths             | 3.6 (0.8 to 7.7)          | 3.7 (0.8 to 8.2)          | 3.5 (0.7 to 7.2)          | 2.9 (0.6 to 6.1)          | 2.7 (0.6 to 6.1)          | 3.1 (0.6 to 6.4)         | -18.8 (-45.9 to 10.3)      | -25.8 (-50.7 to 8.3)         | -9.1 (-41.8 to 30.5)     |
|                        |                                      | DALYs              | 54 (11.3 to 120.9)        | 56.5 (12.8 to 128.6)      | 51 (10.4 to 113.3)        | 49.6 (10.1 to 109.7)      | 48.4 (10 to 111.5)        | 51 (9.3 to 112.4)        | -8.1 (-32.5 to 15.5)       | -14.2 (-35.6 to 13.9)        | 0 (-31.1 to 35.1)        |
|                        | Low temperature                      | YLLs               | 42.6 (9.1 to 94.7)        | 42.9 (9.6 to 99.9)        | 42.1 (8.6 to 90.9)        | 35.8 (7.4 to 78)          | 32.5 (6.7 to 74.2)        | 39.8 (7.2 to 87.4)       | -16.1 (-45.3 to 13)        | -24.3 (-50.2 to 9.2)         | -5.3 (-38.9 to 36)       |
|                        |                                      | YLDs               | 11.4 (2.1 to 28.4)        | 13.6 (2.6 to 34.3)        | 8.9 (1.5 to 22.2)         | 13.8 (2.5 to 33.6)        | 16 (3 to 39.1)            | 11.2 (1.8 to 26.8)       | 21.7 (7.9 to 41.6)         | 17.5 (1.1 to 42)             | 25.3 (7.7 to 48.3)       |
|                        |                                      | Deaths             | 5.8 (3.9 to 8)            | 6.2 (4.2 to 8.7)          | 5.2 (3.5 to 7.3)          | 3.3 (1.9 to 4.7)          | 3.2 (1.9 to 4.8)          | 3.3 (1.8 to 5)           | -42.9 (-58.6 to -23.7)     | -48.2 (-62.4 to -27.5)       | -35.3 (-57.7 to -10.9)   |
|                        |                                      | YLLs               | 90.8 (62.1 to 125.9)      | 97 (65.2 to 137)          | 83.4 (55.7 to 117.4)      | 49.4 (27.2 to 72.1)       | 47.2 (27.2 to 71.1)       | 51.9 (27.4 to 78.8)      | -45.6 (-61.8 to -26.3)     | -51.3 (-66.1 to -30.7)       | -37.8 (-59.7 to -12.8)   |
|                        | Secondhand smoke                     | Deaths             | 1.9 (1.4 to 2.6)          | 2.1 (1.5 to 2.9)          | 1.7 (1.2 to 2.4)          | 1.3 (0.8 to 1.8)          | 1.2 (0.8 to 1.8)          | 1.3 (0.8 to 2)           | -34.4 (-53.8 to -11.4)     | -42 (-60.4 to -16.7)         | -23.6 (-50.6 to 10.6)    |
|                        |                                      | DALYs              | 45.4 (32.9 to 59.1)       | 52.9 (38.4 to 69.4)       | 37.4 (26.2 to 50.9)       | 31.7 (20.8 to 43.2)       | 33.4 (21.8 to 46.5)       | 29.7 (18 to 43.3)        | -30.2 (-47.2 to -9.2)      | -36.8 (-53 to -13)           | -20.5 (-44.9 to 10.2)    |
|                        | Smoking                              | YLLs               | 39 (28 to 51.7)           | 44.1 (31.4 to 59.4)       | 33.4 (23.2 to 45.7)       | 24.5 (14.9 to 34.8)       | 24.1 (14.3 to 35.5)       | 24.9 (14.3 to 37.6)      | -37.3 (-57.2 to -13.2)     | -45.4 (-63.7 to -18.9)       | -25.4 (-53.2 to 9.2)     |
|                        |                                      | YLDs               | 6.4 (4.2 to 8.9)          | 8.8 (5.8 to 12.3)         | 4 (2.6 to 5.6)            | 7.2 (4.7 to 10)           | 9.3 (6.1 to 12.8)         | 4.9 (3.2 to 6.7)         | 12.6 (2.9 to 23.2)         | 6.2 (-4.7 to 19.3)           | 20.9 (2.9 to 40.7)       |
|                        |                                      | Deaths             | 8.7 (7.1 to 11)           | 8.1 (5.9 to 10.9)         | 9.4 (7.5 to 12)           | 6.5 (4.6 to 8.6)          | 5.9 (3.9 to 8.5)          | 7.1 (4.7 to 9.8)         | -25.8 (-49 to 3.6)         | -26.8 (-54.1 to 13.3)        | -24.2 (-52 to 8.9)       |
|                        |                                      | DALYs              | 235.9 (196.7 to 287.4)    | 230.2 (173.2 to 300.3)    | 242.8 (197.9 to 304.5)    | 194 (148.6 to 249)        | 192.5 (138.9 to 253)      | 195.6 (140.6 to 258.6)   | -17.8 (-38.5 to 7.3)       | -16.4 (-41 to 14.5)          | -19.5 (-42.4 to 7.6)     |
|                        |                                      | YLLs               | 184.3 (150.7 to 233.2)    | 170.6 (126.2 to 229.5)    | 198.9 (156 to 261)        | 129.5 (88.9 to 178)       | 117 (74.7 to 169.9)       | 144.3 (94.8 to 204.1)    | -29.7 (-53.4 to -0.6)      | -31.4 (-57 to 5.5)           | -27.4 (-55.6 to 4.8)     |
|                        |                                      | YLDs               | 51.6 (36.4 to 66.4)       | 59.6 (40.6 to 79.5)       | 43.9 (30.9 to 57)         | 64.6 (46.4 to 82.8)       | 75.5 (53.2 to 98)         | 51.2 (37 to 66.3)        | 25 (7.5 to 44.9)           | 26.8 (2.8 to 60.3)           | 16.7 (4.6 to 30.5)       |
| Belgium                | All risk factors                     | Deaths             | 69.6 (54.2 to 89.9)       | 75.2 (57 to 98.4)         | 64.6 (48.6 to 87)         | 59.9 (45.4 to 80.6)       | 63.6 (46 to 82.8)         | 56.1 (40.1 to 82.1)      | -14 (-33.2 to 14.3)        | -15.5 (-36.8 to 13)          | -13.1 (-36.2 to 19.5)    |
|                        |                                      | DALYs              | 1515.1 (1221 to 1911.7)   | 1718.1 (1364.6 to 2172.6) | 1343.7 (1037.8 to 1832.5) | 1355.5 (1061.2 to 1716.9) | 1502.2 (1138.1 to 1907.6) | 1214 (894.2 to 1718.2)   | -10.5 (-29.5 to 16.2)      | -12.6 (-32 to 13.8)          | -9.7 (-31.9 to 22.4)     |
|                        |                                      | YLLs               | 1324.6 (1041.7 to 1706.6) | 1469 (1122.1 to 1917.2)   | 1204.5 (904.6 to 1655.7)  | 1135.7 (847.2 to 1490.7)  | 1215.2 (868.5 to 1595.2)  | 1058.6 (741.2 to 1555.8) | -14.3 (-34.9 to 16.8)      | -17.3 (-39.6 to 13.7)        | -12.1 (-36.5 to 24.2)    |
|                        |                                      | YLDs               | 190.5 (137.5 to 240.3)    | 249.2 (181.2 to 313.4)    | 139.2 (100.9 to 178.3)    | 219.8 (158.9 to 277.1)    | 287.1 (207.6 to 362.3)    | 155.4 (111.4 to 196.6)   | 15.4 (8.7 to 22.1)         | 15.2 (7.4 to 23.8)           | 11.6 (3.5 to 20.7)       |
|                        | Alcohol use                          | Deaths             | 0 (0 to 0.1)              | 0 (0 to 0)                | 0 (0 to 0.1)              | 0.1 (0 to 0.2)            | 0 (0 to 0.1)              | 0.2 (0 to 0.4)           | 439.8 (-1589.2 to 3855.6)  | 1802.3 (-11045.4 to 11355)   | 406.5 (-345.1 to 2436.9) |
|                        |                                      | DALYs              | 1 (0.2 to 2.1)            | 0.2 (-0.2 to 0.6)         | 1.7 (0.3 to 3.5)          | 4.7 (0.1 to 7.9)          | 1.3 (-0.1 to 2.5)         | 8 (0.7 to 13.7)          | 373.1 (-130.7 to 1564.7)   | 657.3 (-4786.3 to 5376.2)    | 373.3 (-100 to 1552.4)   |
|                        |                                      | YLLs               | 0.9 (0.2 to 2)            | 0.2 (-0.1 to 0.6)         | 1.6 (0.4 to 3.3)          | 4.2 (0.2 to 7.3)          | 1.1 (-0.1 to 2.1)         | 7.1 (0.6 to 12.6)        | 344 (-100.1 to 1463.3)     | 514.3 (-7424.7 to 8227.7)    | 350.6 (-100 to 1513)     |
|                        |                                      | YLDs               | 0.1 (0 to 0.2)            | 0 (-0.1 to 0)             | 0.1 (0 to 0.3)            | 0.5 (0 to 0.9)            | 0.2 (-0.1 to 0.4)         | 0.9 (0.1 to 1.5)         | 855.8 (-7777.1 to 11175.9) | -1546.9 (-12851.7 to 7640.6) | 688.2 (-2637.6 to 4872)  |
|                        | Ambient particulate matter pollution | Deaths             | 14.5 (9.1 to 22)          | 14.9 (8.8 to 23)          | 14.3 (8.7 to 21.7)        | 16.5 (10.7 to 23.9)       | 17.5 (11.4 to 24.7)       | 15.4 (9.6 to 24.3)       | 13.4 (-17 to 66.3)         | 17.5 (-18 to 77.9)           | 8.2 (-23.5 to 64.1)      |
|                        |                                      | DALYs              | 355.2 (223.4 to 517.9)    | 385.9 (232.4 to 570.5)    | 331.1 (207.2 to 483.9)    | 424.7 (287.5 to 593.5)    | 473.7 (317.2 to 643.4)    | 377.8 (242.4 to 577.7)   | 19.5 (-11.7 to 73.8)       | 22.8 (-11.6 to 84.3)         | 14.1 (-17.5 to 70.3)     |
|                        |                                      | YLLs               | 308.8 (192.1 to 459)      | 327.9 (193.5 to 496.4)    | 294.6 (180.1 to 445.1)    | 352.7 (230.2 to 512.6)    | 379.4 (241.6 to 534.9)    | 327 (201.2 to 517.3)     | 14.2 (-19.3 to 68.6)       | 15.7 (-20.5 to 81.4)         | 11 (-23.1 to 72.1)       |
|                        |                                      | YLDs               | 46.4 (27 to 68)           | 58 (32.6 to 87.3)         | 36.4 (21.7 to 53)         | 72 (48.3 to 99.2)         | 94.3 (63.5 to 129.5)      | 50.8 (33.2 to 70.3)      | 55.2 (29.1 to 109.8)       | 62.5 (31.8 to 125.1)         | 39.4 (18.6 to 86.5)      |
|                        | Diet high in red meat                | Deaths             | 3.7 (1.7 to 5.8)          | 4.1 (1.8 to 6.5)          | 3.4 (1.5 to 5.5)          | 2.1 (0.7 to 3.6)          | 2.2 (0.8 to 3.9)          | 1.9 (0.6 to 3.4)         | -44.2 (-67.7 to -17.1)     | -45.9 (-68.9 to -17.3)       | -43.1 (-67.3 to -12.5)   |
|                        |                                      | DALYs              | 104.7 (48.5 to 158.4)     | 122.5 (57.7 to 185.3)     | 90.5 (40.9 to 141.6)      | 61.3 (21.7 to 99.8)       | 68.8 (24.4 to 114.5)      | 54.2 (18.9 to 93.8)      | -41.5 (-65.9 to -14.7)     | -43.8 (-67.7 to -16)         | -40.1 (-65 to -10.3)     |
|                        |                                      | YLLs               | 90.4 (41.4 to 138.5)      | 103.5 (46.4 to 157.9)     | 80 (35.5 to 127.8)        | 50.5 (17.8 to 83.8)       | 54.6 (20.2 to 93.4)       | 46.5 (16.9 to 82.6)      | -44.2 (-68 to -15.3)       | -47.3 (-70.5 to -16)         | -41.8 (-66.5 to -8)      |
|                        | Diet high in sodium                  | YLDs               | 14.4 (5.8 to 22.3)        | 19 (7.6 to 29.6)          | 10.5 (4.2 to 16.4)        | 10.9 (3.1 to 18.2)        | 14.2 (3.8 to 23.8)        | 7.7 (2.2 to 12.8)        | -24.3 (-50.8 to -9.3)      | -25.1 (-53.6 to -8.7)        | -27.1 (-52.6 to -10)     |
|                        |                                      | Deaths             | 1.4 (0.2 to 5.6)          | 1.1 (0.2 to 4.4)          | 1.6 (0.1 to 7)            | 1.2 (0.2 to 4.9)          | 0.9 (0.2 to 3.7)          | 1.4 (0.1 to 6.4)         | -15.2 (-48.9 to 57.1)      | -19.4 (-61.6 to 80.8)        | -12.1 (-52.5 to 88.7)    |
|                        |                                      | DALYs              | 33.6 (4.2 to 136.3)       | 27.5 (4.8 to 110.7)       | 39.1 (2.9 to 163.2)       | 30.1 (3.7 to 121.9)       | 23 (4.2 to 96.7)          | 36.9 (2.5 to 152.9)      | -10.4 (-48 to 71)          | -16.2 (-60 to 89.4)          | -5.7 (-44.4 to 91.5)     |
|                        | Diet low in fiber                    | YLLs               | 29.5 (3.6 to 121.5)       | 23.5 (4 to 96.6)          | 34.9 (2.6 to 147.5)       | 25.5 (3.1 to 104.4)       | 18.6 (3.3 to 80.1)        | 32 (2.2 to 136)          | -13.8 (-51.1 to 65.5)      | -20.8 (-62.7 to 82.3)        | -8.4 (-46.6 to 91.9)     |
|                        |                                      | YLDs               | 4.1 (0.5 to 16.2)         | 4 (0.7 to 16.4)           | 4.2 (0.3 to 16.3)         | 4.7 (0.6 to 18.7)         | 4.4 (0.8 to 18.7)         | 4.9 (0.3 to 18.3)        | 13.9 (-32.3 to 104.5)      | 11.1 (-47.9 to 144.4)        | 16.9 (-25.9 to 116.3)    |
|                        |                                      | Deaths             | 1.3 (0.3 to 2.7)          | 1.4 (0.3 to 3)            | 1.2 (0.3 to 2.7)          | 1.7 (0.4 to 3.6)          | 1.8 (0.4 to 3.8)          | 1.6 (0.3 to 3.6)         | 32.6 (-3.3 to 93.6)        | 31.7 (-9.9 to 99.3)          | 32 (-10.8 to 104)        |
|                        | Diet low in fruits                   | DALYs              | 31.2 (6.4 to 68.6)        | 35.1 (7.1 to 78.6)        | 28.2 (5.9 to 61.6)        | 44.8 (8.9 to 95.8)        | 49.3 (9.7 to 103.4)       | 40.6 (8.3 to 90.7)       | 43.6 (8 to 104.1)          | 40.3 (1.4 to 103.9)          | 44.2 (2.7 to 115.2)      |
|                        |                                      | YLLs               | 27 (5.6 to 59.1)          | 29.6 (6 to 65.8)          | 24.9 (5.2 to 55.4)        | 37 (7.4 to 82.7)          | 39.2 (7.6 to 84.8)        | 35 (7 to 81)             | 37.4 (-0.4 to 101.8)       | 32.3 (-9 to 101.8)           | 40.4 (-4.6 to 119.2)     |
|                        |                                      | YLDs               | 4.3 (0.8 to 9.4)          | 5.5 (1.1 to 12.3)         | 3.2 (0.6 to 7.1)          | 7.8 (1.5 to 15.9)         | 10.1 (1.9 to 21.1)        | 5.6 (1.1 to 11.3)        | 82.4 (54.1 to 129.5)       | 83.4 (47.6 to 144.8)         | 72.9 (40.3 to 128)       |
|                        | Diet low in vegetables               | Deaths             | 2.7 (1.3 to 4.6)          | 3.1 (1.4 to 5.3)          | 2.4 (1.2 to 4.2)          | 2.5 (1 to 4.7)            | 2.7 (1 to 5.1)            | 2.3 (0.9 to 4.4)         | -9.6 (-41.4 to 31.1)       | -13.3 (-45.4 to 29.2)        | -6.7 (-43.4 to 41.8)     |
|                        |                                      | DALYs              | 74.8 (35.7 to 124.1)      | 89.6 (42.5 to 151.1)      | 62.8 (29.5 to 108.8)      | 70.4 (27.9 to 127)        | 80.2 (31.9 to 147.4)      | 61.2 (24.4 to 115.6)     | -5.8 (-37.7 to 33.5)       | -10.6 (-42.3 to 29.1)        | -2.6 (-37.8 to 43.6)     |
|                        |                                      | YLLs               | 65.4 (31.5 to 110.6)      | 77 (36.8 to 130.6)        | 56.2 (26.5 to 98)         | 58.6 (23.9 to 109.4)      | 64.4 (26.4 to 120.1)      | 53 (21.2 to 103.4)       | -10.4 (-42 to 33.5)        | -16.3 (-47.3 to 27.8)        | -5.6 (-41.5 to 45.2)     |
|                        | Diet low in vegetables               | YLDs               | 9.4 (3.4 to 16.8)         | 12.7 (4.5 to 22.9)        | 6.6 (2.4 to 11.9)         | 11.8 (3.8 to 22.4)        | 15.7 (5 to 30)            | 8.1 (2.8 to 15.4)        | 26.4 (2 to 46.6)           | 24.3 (-1.7 to 47.7)          | 22.5 (-2.1 to 49)        |
| Deaths                 |                                      | 1 (0.2 to 2.1)     | 1 (0.2 to 2.2)            | 0.9 (0.2 to 2.2)          | 1.2 (0.3 to 2.3)          | 1.2 (0.3 to 2.3)          | 1.2 (0.3 to 2.4)          | 24.3 (-25.6 to 112.5)    | 25.7 (-27.8 to 142.1)      | 22.1 (-29.3 to 114.2)        |                          |
| DALYs                  |                                      | 21.3 (4.4 to 50.5) | 22.8 (4.6 to 54.6)        | 20.2 (4.3 to 48.7)        | 30 (7.5 to 59.1)          | 32.1 (7.2 to 63.6)        | 28 (7.1 to 58.1)          | 40.6 (-18 to 156.1)      | 40.9 (-19.8 to 177.8)      | 38.5 (-20 to 155.6)          |                          |
| Diet low in vegetables | YLLs                                 | 18.6 (3.9 to 45.4) | 19.3 (4 to 47.8)          | 18 (3.9 to 43.6)          | 25 (6.3 to 50.2)          | 25.7 (5.8 to 51.5)        | 24.2 (6.1 to 51.6)        | 34.5 (-23.5 to 158.6)    | 32.9 (-27.1 to 172.8)      | 34.7 (-24.7 to 156.7)        |                          |
|                        | YLDs                                 | 2.8 (0.5 to 6.1)   | 3.4 (0.6 to 7.8)          | 2.2 (0.4 to 4.9)          | 5 (1 to 9.9)              | 6.4 (1.2 to 12.6)         | 3.7 (0.8 to 7.3)          | 81.5 (27.7 to 198.3)     | 86 (24.5 to 224.1)         | 69.7 (20.5 to 174.1)         |                          |
| Diet low in vegetables | Deaths                               | 3.8 (1.9 to 5.8)   | 4.1 (2.1 to 6.1)          | 3.5 (1.7 to 5.6)          | 4 (1.9 to 6)              | 4.3 (2 to 6.3)            | 3.7 (1.7 to 6.1)          | 6 (-19.3 to 41.8)        | 4.3 (-23.1 to 43)          | 7.3 (-23.4 to 50.9)          |                          |

| Location         | Risk factor                              | Measure                   | 1990                      |                           |                           | 2019                    |                           |                         | % Change (1990 to 2019) |                        |                        |
|------------------|------------------------------------------|---------------------------|---------------------------|---------------------------|---------------------------|-------------------------|---------------------------|-------------------------|-------------------------|------------------------|------------------------|
|                  |                                          |                           | Both                      | Female                    | Male                      | Both                    | Female                    | Male                    | Both                    | Female                 | Male                   |
| Morocco          | Whole grains                             | DALYs                     | 80.8 (40.5 to 118.9)      | 92.8 (45.4 to 134.8)      | 70.4 (34.4 to 110.3)      | 94.7 (41 to 139.3)      | 107 (46.5 to 156.8)       | 83 (36.1 to 131.5)      | 17.2 (-8.7 to 50.9)     | 15.3 (-11.4 to 50.8)   | 17.8 (-13.7 to 61.4)   |
|                  |                                          | YLLs                      | 64.9 (32.4 to 99)         | 71.6 (35.1 to 107.6)      | 59 (28.4 to 96.7)         | 75.6 (33.1 to 115.6)    | 81.5 (34.7 to 124.5)      | 69.9 (29.4 to 115.8)    | 16.5 (-14.4 to 59)      | 13.9 (-19.8 to 59.6)   | 18.3 (-17.9 to 72.1)   |
|                  |                                          | YLDs                      | 15.9 (7.6 to 23.9)        | 21.2 (10 to 31.9)         | 11.4 (5.3 to 17.3)        | 19.1 (8.5 to 28.9)      | 25.4 (11.5 to 38)         | 13.1 (5.8 to 19.9)      | 20.1 (9.3 to 28.9)      | 20 (7.5 to 31.9)       | 15.3 (2.1 to 29)       |
|                  | High body-mass index                     | Deaths                    | 18.4 (11.1 to 27.3)       | 23.3 (14.2 to 33.1)       | 14.1 (7.8 to 22.7)        | 18.7 (11.2 to 28.2)     | 21.5 (13.4 to 31.7)       | 15.9 (8.7 to 26.1)      | 1.4 (-25.3 to 40.9)     | -7.7 (-33 to 28.3)     | 12.5 (-20.9 to 69.2)   |
|                  |                                          | DALYs                     | 585.3 (374.6 to 824)      | 762.5 (507.7 to 1045.6)   | 438.4 (257 to 661.9)      | 605.3 (392.5 to 858.3)  | 717.2 (473.8 to 1001.6)   | 498.7 (297.8 to 782.8)  | 3.4 (-20.6 to 38.1)     | -5.9 (-28.4 to 27.6)   | 13.8 (-16.5 to 63.4)   |
|                  |                                          | YLLs                      | 508.4 (327 to 724.6)      | 651.6 (422.4 to 907.2)    | 389.8 (223.2 to 602.1)    | 499.9 (316.5 to 731.1)  | 573.3 (368.6 to 822.4)    | 429.7 (244.7 to 701.3)  | -1.7 (-27.9 to 38.7)    | -12 (-37.7 to 26.5)    | 10.2 (-22.9 to 66.2)   |
|                  | High fasting plasma glucose              | YLDs                      | 76.9 (47.3 to 110.1)      | 111 (70 to 156.8)         | 48.5 (28.5 to 72.5)       | 105.5 (68.7 to 147)     | 143.9 (95.2 to 198.6)     | 69 (42.6 to 97.5)       | 37.1 (24.3 to 55.1)     | 29.7 (17.6 to 46.6)    | 42.1 (23.7 to 72.3)    |
|                  |                                          | Deaths                    | 21.7 (11.4 to 42.2)       | 22.1 (11.3 to 42.8)       | 21.3 (11.1 to 41.1)       | 23.1 (12.2 to 44.4)     | 24.6 (12.8 to 46)         | 21.6 (10.9 to 42.5)     | 6.7 (-20.7 to 49.6)     | 11.5 (-20.1 to 67.3)   | 1.5 (-28.4 to 48.6)    |
|                  |                                          | DALYs                     | 413.2 (241.1 to 701.7)    | 434.5 (241.4 to 749.9)    | 394.4 (221.9 to 689.6)    | 502.5 (284.9 to 866.2)  | 559 (322.6 to 933.7)      | 447.5 (248.1 to 797.9)  | 21.6 (-9.8 to 69.8)     | 28.7 (-8 to 91.3)      | 13.5 (-20 to 67.5)     |
|                  | High LDL cholesterol                     | YLLs                      | 363.1 (209.6 to 618.6)    | 372.8 (206.6 to 650.8)    | 355 (198.3 to 622.3)      | 421.1 (235.4 to 722.8)  | 452.6 (254.7 to 770.2)    | 390.4 (208.8 to 692.1)  | 16 (-16.9 to 67.8)      | 21.4 (-17.1 to 85.6)   | 10 (-25 to 68.6)       |
|                  |                                          | YLDs                      | 50.1 (26.2 to 87.3)       | 61.7 (31.8 to 109.4)      | 39.4 (20.1 to 70.6)       | 81.4 (44.6 to 135.6)    | 106.5 (57.7 to 178.6)     | 57.2 (30.7 to 95.8)     | 62.4 (33 to 109.3)      | 72.5 (33.4 to 137.6)   | 45.1 (19.8 to 91.4)    |
|                  |                                          | Deaths                    | 8.5 (3.1 to 19.4)         | 9.7 (3.6 to 22.1)         | 7.5 (2.6 to 16.9)         | 11 (4.5 to 22.2)        | 12 (5.1 to 24.3)          | 9.9 (3.8 to 20.2)       | 28.2 (-1.9 to 83.9)     | 24.1 (-8.7 to 79.3)    | 32.2 (-5.9 to 99.8)    |
|                  | High systolic blood pressure             | DALYs                     | 192.7 (105.7 to 347.3)    | 232 (131.7 to 410.8)      | 158.9 (81.7 to 299.8)     | 277.1 (162.6 to 451.8)  | 321.1 (192.8 to 530.3)    | 235 (130.7 to 407)      | 43.8 (12.1 to 94.4)     | 38.4 (6.9 to 85.3)     | 47.9 (8.1 to 115.5)    |
|                  |                                          | YLLs                      | 151.8 (78.7 to 291)       | 175.6 (91.8 to 336.5)     | 131.1 (63.7 to 267.4)     | 218.4 (121.7 to 369.7)  | 241.6 (135.4 to 422.7)    | 196 (102.1 to 357.3)    | 43.9 (5.7 to 108.2)     | 37.6 (-3.1 to 103.3)   | 49.5 (2 to 132.9)      |
|                  |                                          | YLDs                      | 40.9 (24.1 to 67.5)       | 56.4 (33.1 to 91.6)       | 27.8 (16.4 to 46.3)       | 58.7 (36.4 to 94.2)     | 79.5 (48.9 to 126.8)      | 39 (23.6 to 62.9)       | 43.6 (31.7 to 58.1)     | 40.9 (27.4 to 57.2)    | 40.2 (24.4 to 61.2)    |
|                  | High temperature                         | Deaths                    | 44.4 (32.4 to 59.7)       | 51.2 (37.1 to 69)         | 38.1 (26.6 to 54.4)       | 37.5 (26.4 to 51.9)     | 41.4 (28.4 to 56.2)       | 33.5 (22.2 to 50.6)     | -15.6 (-36.4 to 13.6)   | -19.2 (-41.3 to 11.2)  | -12 (-37.6 to 23.2)    |
|                  |                                          | DALYs                     | 991.9 (765.2 to 1282.8)   | 1186.8 (909.5 to 1550.5)  | 822.9 (604.5 to 1146.9)   | 893.2 (668.4 to 1153.5) | 1012.2 (733.6 to 1309.2)  | 777.9 (541.4 to 1104.3) | -9.9 (-30.1 to 17.9)    | -14.7 (-36.6 to 13.6)  | -5.5 (-30.8 to 29.6)   |
|                  |                                          | YLLs                      | 866.2 (653.3 to 1153.1)   | 1016.2 (750.6 to 1352.1)  | 736.8 (524.2 to 1057.2)   | 746 (537.3 to 1007.6)   | 817.9 (566.4 to 1102.5)   | 675.9 (454.7 to 1014.1) | -13.9 (-36 to 18.3)     | -19.5 (-42.7 to 13.4)  | -8.3 (-35.7 to 31.6)   |
|                  | Household air pollution from solid fuels | YLDs                      | 125.6 (88.1 to 163.1)     | 170.6 (119.2 to 223.2)    | 86.2 (59.5 to 114.7)      | 147.1 (104.9 to 193.1)  | 194.3 (136.9 to 258.2)    | 102 (71.6 to 133.6)     | 17.1 (4.9 to 30.3)      | 13.9 (-2.6 to 32)      | 18.3 (3.7 to 35)       |
|                  |                                          | Deaths                    | 1.3 (-0.6 to 5.1)         | 1.3 (-0.7 to 5.5)         | 1.2 (-0.6 to 4.8)         | 1.3 (-0.3 to 4)         | 1.4 (-0.3 to 4.3)         | 1.2 (-0.3 to 3.9)       | 5.1 (-187.6 to 261.2)   | 4.3 (-197.2 to 252.4)  | 5 (-179.9 to 261.9)    |
|                  |                                          | YLLs                      | 26.3 (-13 to 106.1)       | 28 (-14 to 116)           | 24.9 (-12.2 to 101.6)     | 25.1 (-6.1 to 78.1)     | 26.6 (-6.5 to 82.8)       | 23.6 (-5.4 to 72.8)     | -4.7 (-177.2 to 223)    | -5 (-184 to 225)       | -5.6 (-168 to 219)     |
|                  | Kidney dysfunction                       | Deaths                    | 6.7 (3.2 to 11.4)         | 8.3 (4 to 14.1)           | 5.3 (2.2 to 9.9)          | 0 (0 to 0.1)            | 0.1 (0 to 0.1)            | 0 (0 to 0.1)            | -99.4 (-99.8 to -98.5)  | -99.4 (-99.8 to -98.5) | -99.5 (-99.8 to -98.5) |
|                  |                                          | DALYs                     | 165.1 (78.1 to 277.2)     | 215.5 (107.3 to 353.4)    | 122.3 (52.6 to 226.6)     | 1 (0.3 to 2.6)          | 1.4 (0.4 to 3.4)          | 0.7 (0.2 to 1.8)        | -99.4 (-99.8 to -98.4)  | -99.4 (-99.8 to -98.4) | -99.4 (-99.8 to -98.5) |
|                  |                                          | YLLs                      | 142.9 (66.7 to 243.9)     | 183.1 (89.8 to 304.2)     | 108.9 (45.8 to 206.5)     | 0.8 (0.2 to 2.1)        | 1.1 (0.3 to 2.8)          | 0.6 (0.2 to 1.6)        | -99.4 (-99.8 to -98.5)  | -99.4 (-99.8 to -98.5) | -99.4 (-99.8 to -98.5) |
|                  | Lead exposure                            | YLDs                      | 22.2 (10.8 to 36.4)       | 32.4 (16.4 to 52.7)       | 13.4 (5.9 to 23.7)        | 0.2 (0.1 to 0.5)        | 0.3 (0.1 to 0.7)          | 0.1 (0 to 0.3)          | -99.2 (-99.7 to -98)    | -99.2 (-99.7 to -98)   | -99.3 (-99.8 to -98.3) |
|                  |                                          | Deaths                    | 6.5 (4.4 to 9.2)          | 7.7 (5.1 to 11.2)         | 5.5 (3.7 to 7.8)          | 7.7 (4.7 to 11)         | 8.6 (5.1 to 12.6)         | 6.8 (4.1 to 10.5)       | 18.2 (-12.7 to 59.8)    | 12.2 (-19.2 to 55.6)   | 25.1 (-14 to 76.8)     |
|                  |                                          | DALYs                     | 144.4 (107.5 to 191.8)    | 179.9 (132.3 to 244.6)    | 113.2 (82.1 to 156.8)     | 179.3 (125 to 238.2)    | 212.8 (148.5 to 287.9)    | 147.3 (99.3 to 212.1)   | 24.2 (-4.8 to 62.4)     | 18.3 (-10.5 to 57)     | 30 (-4.6 to 78.7)      |
|                  | Low physical activity                    | YLLs                      | 124.3 (90.9 to 170.6)     | 151.4 (107.5 to 211.2)    | 100.6 (71.4 to 140.5)     | 148.6 (102 to 205)      | 170.2 (112.3 to 236.1)    | 127.8 (82.9 to 190.1)   | 19.5 (-13.3 to 64)      | 12.4 (-20.2 to 58.4)   | 27 (-11.3 to 80.7)     |
|                  |                                          | YLDs                      | 20.1 (13.6 to 26.9)       | 28.5 (19.3 to 38.3)       | 12.6 (8.5 to 16.9)        | 30.8 (21 to 41.3)       | 42.6 (29.2 to 57.3)       | 19.5 (13 to 26.4)       | 53.4 (42.5 to 65.1)     | 49.6 (37 to 63.7)      | 54.3 (39.5 to 70.7)    |
|                  |                                          | Deaths                    | 3.1 (1.5 to 4.9)          | 2.7 (1.1 to 4.6)          | 3.4 (1.7 to 5.4)          | 1.9 (0.7 to 3.4)        | 1.6 (0.5 to 3.2)          | 2.1 (0.9 to 3.9)        | -39.2 (-59.5 to -17.7)  | -42 (-64.1 to -18.7)   | -36.9 (-58.7 to -8.7)  |
| Low temperature  | DALYs                                    | 68.3 (30.7 to 110.5)      | 63.4 (22.9 to 108.4)      | 72.8 (35.7 to 116.7)      | 35.3 (11.2 to 68.2)       | 31.1 (6.9 to 65.5)      | 39.3 (15.2 to 74.5)       | -48.3 (-67.9 to -29.9)  | -50.9 (-73.7 to -31)    | -46 (-66 to -22.9)     |                        |
|                  | YLLs                                     | 60 (26.7 to 98.7)         | 54.4 (19.9 to 94)         | 65.3 (31.5 to 106.1)      | 30.2 (10 to 60)           | 25.6 (5.8 to 56.1)      | 34.6 (13.3 to 66.8)       | -49.7 (-69.2 to -29.9)  | -53 (-75.2 to -31.6)    | -47 (-67.8 to -21.6)   |                        |
|                  | YLDs                                     | 8.2 (3.6 to 14.1)         | 9 (3.2 to 16.1)           | 7.6 (3.7 to 12.2)         | 5.1 (1.5 to 10.1)         | 5.6 (1.1 to 11.8)       | 4.7 (1.7 to 8.6)          | -37.9 (-61.6 to -23.2)  | -38.4 (-69.2 to -21.6)  | -37.7 (-58 to -23.9)   |                        |
| Secondhand smoke | Deaths                                   | 4.7 (1.1 to 9.8)          | 5 (1.2 to 10.6)           | 4.3 (0.8 to 9.2)          | 5.1 (1.2 to 10.9)         | 5.4 (1.3 to 11.4)       | 4.7 (1 to 10.4)           | 8.8 (-16.8 to 45)       | 7.9 (-20.8 to 48.1)     | 9.4 (-21.8 to 52.9)    |                        |
|                  | DALYs                                    | 74.6 (16.1 to 169.7)      | 84.3 (19.4 to 190.9)      | 65.8 (12.1 to 152.3)      | 89.1 (17.7 to 202.7)      | 100.1 (22.8 to 227.4)   | 78.4 (13.1 to 183.7)      | 19.4 (-7.3 to 53.5)     | 18.7 (-9.2 to 55.5)     | 19.2 (-12.4 to 63.1)   |                        |
|                  | YLLs                                     | 62.3 (13.6 to 138.7)      | 67.9 (15.9 to 153.4)      | 57.1 (10.9 to 130)        | 73.3 (15 to 165.8)        | 79 (18 to 179.8)        | 67.8 (12.1 to 158.7)      | 17.7 (-11.6 to 59.2)    | 16.3 (-16.6 to 61.6)    | 18.6 (-16.4 to 68)     |                        |
| Smoking          | YLDs                                     | 12.4 (2.3 to 29.5)        | 16.4 (3.3 to 38.9)        | 8.7 (1.4 to 21.7)         | 15.8 (2.9 to 37.9)        | 21.1 (4.2 to 50.4)      | 10.7 (1.6 to 26.4)        | 27.8 (15.2 to 42.8)     | 28.5 (13.5 to 48.8)     | 22.9 (6.4 to 40.5)     |                        |
|                  | Deaths                                   | 3.4 (-0.3 to 7.7)         | 3.6 (-0.3 to 8.4)         | 3.2 (-0.3 to 7.5)         | 2.8 (-0.5 to 6.6)         | 3 (-0.6 to 7.2)         | 2.7 (-0.5 to 6.4)         | -15.9 (-68.1 to 40.8)   | -16.6 (-68 to 40.6)     | -15.9 (-68 to 44.2)    |                        |
|                  | YLLs                                     | 70.9 (-6 to 159.9)        | 75.7 (-6.9 to 172.9)      | 67.2 (-5.8 to 155.3)      | 54.2 (-10 to 126.5)       | 57.5 (-11.3 to 135.9)   | 50.9 (-8.5 to 123.2)      | -23.6 (-70.7 to 25.9)   | -24 (-72.1 to 29.1)     | -24.2 (-72.4 to 33.2)  |                        |
| All risk factors | Deaths                                   | 3.3 (2.3 to 4.5)          | 3.9 (2.7 to 5.4)          | 2.8 (1.9 to 4.1)          | 3 (2 to 4.3)              | 3.5 (2.3 to 4.9)        | 2.5 (1.5 to 3.8)          | -9.7 (-31 to 23)        | -10.9 (-35.4 to 23.9)   | -11.5 (-37.2 to 25.8)  |                        |
|                  | DALYs                                    | 84.8 (58.2 to 114.8)      | 112.3 (78 to 153.2)       | 63.2 (41.8 to 91.8)       | 79.4 (53.5 to 110.4)      | 102.1 (69.2 to 141.6)   | 57.9 (36.9 to 88.6)       | -6.4 (-28.5 to 25.3)    | -9.1 (-32.8 to 24.8)    | -8.4 (-34.2 to 29.6)   |                        |
|                  | YLLs                                     | 77.7 (53.1 to 106.2)      | 101.6 (69.4 to 140.7)     | 59.1 (38.7 to 87.1)       | 70.4 (46.3 to 99.9)       | 88.6 (58.6 to 127.6)    | 53.2 (32.8 to 83.5)       | -9.4 (-32.7 to 24.9)    | -12.8 (-38.3 to 25.3)   | -9.9 (-37.3 to 30.5)   |                        |
| All risk factors | YLDs                                     | 7.1 (4.6 to 9.7)          | 10.8 (7 to 14.8)          | 4.1 (2.7 to 5.9)          | 9 (5.9 to 12.4)           | 13.5 (8.8 to 18.6)      | 4.7 (3.1 to 6.6)          | 26.4 (15.6 to 38.8)     | 25.3 (12.5 to 40.6)     | 14 (-2.5 to 33.4)      |                        |
|                  | Deaths                                   | 8.8 (6.6 to 11.9)         | 1.2 (0.8 to 1.8)          | 15.7 (11.7 to 21.5)       | 6.2 (4.4 to 8.9)          | 0.6 (0.4 to 0.9)        | 11.6 (8.1 to 16.7)        | -29.2 (-50 to 0.4)      | -49.6 (-70.3 to -18.1)  | -26 (-48 to 5.7)       |                        |
|                  | DALYs                                    | 235.7 (181 to 321.9)      | 34.5 (23.3 to 50.7)       | 409.6 (312.6 to 561.7)    | 175.8 (124.8 to 246.9)    | 18.2 (11.7 to 26.7)     | 325.7 (229 to 463.3)      | -25.4 (-45.4 to 3.6)    | -47.1 (-68 to -16)      | -20.5 (-41.6 to 10.4)  |                        |
| All risk factors | YLLs                                     | 207.7 (154.3 to 290.2)    | 29.2 (19.3 to 43.6)       | 362.4 (266.3 to 513.1)    | 150.4 (102 to 219.7)      | 14.5 (9.1 to 22.2)      | 279.8 (188.4 to 413.1)    | -27.6 (-49.9 to 5.5)    | -50.3 (-71.5 to -17.4)  | -22.8 (-46.5 to 13.8)  |                        |
|                  | YLDs                                     | 28 (19.9 to 36.2)         | 5.3 (3.4 to 7.6)          | 47.2 (33.8 to 61.3)       | 25.4 (18.1 to 32.4)       | 3.7 (2.3 to 5.5)        | 46 (32.9 to 58.6)         | -9.3 (-18.5 to 0.1)     | -29.2 (-53.4 to 6.3)    | -2.6 (-12.5 to 7.7)    |                        |
|                  | Deaths                                   | 111.5 (86.3 to 133.6)     | 113.4 (83.5 to 141.7)     | 109.5 (83.5 to 141.1)     | 100.7 (79.6 to 122.9)     | 101.5 (78.7 to 127.1)   | 100 (76.7 to 129.4)       | -9.6 (-27.7 to 11.8)    | -10.5 (-30.2 to 15.3)   | -8.7 (-30.4 to 17.4)   |                        |
| All risk factors | DALYs                                    | 2322.5 (1881.9 to 2800.4) | 2410.8 (1894.7 to 2964.1) | 2230.9 (1748.2 to 2782.6) | 1995.8 (1606.4 to 2406.6) | 2075.6 (1647 to 2575.6) | 1914.7 (1488.1 to 2439.4) | -14.1 (-32 to 6.4)      | -13.9 (-32.6 to 9.5)    | -14.2 (-35.3 to 8.5)   |                        |

| Location                             | Risk factor | Measure                   | 1990                      |                           |                          | 2019                      |                           |                           | % Change (1990 to 2019) |                            |                         |
|--------------------------------------|-------------|---------------------------|---------------------------|---------------------------|--------------------------|---------------------------|---------------------------|---------------------------|-------------------------|----------------------------|-------------------------|
|                                      |             |                           | Both                      | Female                    | Male                     | Both                      | Female                    | Male                      | Both                    | Female                     | Male                    |
| Alcohol use                          |             | YLLs                      | 2102.1 (1663.2 to 2582.5) | 2148.5 (1636 to 2695.4)   | 2054.2 (1567 to 2626.8)  | 1762.1 (1369.5 to 2153.1) | 1791.8 (1370.7 to 2259.8) | 1732.5 (1315.6 to 2253.8) | -16.2 (-35.4 to 6.2)    | -16.6 (-37.4 to 9.5)       | -15.7 (-38.4 to 9.6)    |
|                                      |             | YLDs                      | 220.3 (161.1 to 280.3)    | 262.3 (191.2 to 335.4)    | 176.6 (131 to 226.7)     | 233.7 (170 to 294.8)      | 283.9 (206.8 to 356.9)    | 182.2 (133.2 to 233)      | 6.1 (0.4 to 12.4)       | 8.2 (0.6 to 16.7)          | 3.2 (-4.7 to 11.1)      |
|                                      |             | Deaths                    | 0.7 (0.3 to 1.2)          | 0 (0 to 0)                | 1.4 (0.6 to 2.4)         | 0.2 (-0.1 to 0.4)         | 0 (0 to 0)                | 0.3 (-0.2 to 0.8)         | -78.2 (-119.6 to -49.5) | -219.9 (-1671.1 to 1370.2) | -78.3 (-119.4 to -50)   |
|                                      |             | DALYs                     | 22.7 (11.4 to 36.8)       | 0.2 (-0.1 to 0.4)         | 45.7 (22.7 to 74.4)      | 6 (0 to 12.9)             | -0.1 (-0.2 to 0.1)        | 12 (0 to 26.1)            | -73.6 (-100.1 to -49.1) | -135.4 (-785.4 to 641.2)   | -73.7 (-100.1 to -49.5) |
| Ambient particulate matter pollution |             | YLLs                      | 21.3 (10.5 to 35)         | 0.2 (0 to 0.4)            | 42.9 (21.1 to 70.6)      | 5.5 (0.1 to 12)           | 0 (-0.1 to 0.1)           | 11 (0.1 to 23.9)          | -74.2 (-99.6 to -49.8)  | -124.7 (-662.2 to 228.3)   | -74.4 (-99.5 to -50.2)  |
|                                      |             | YLDs                      | 1.4 (0.6 to 2.4)          | 0 (0 to 0)                | 2.8 (1.1 to 4.8)         | 0.5 (-0.2 to 1.3)         | 0 (0 to 0)                | 1 (-0.3 to 2.5)           | -64 (-124 to -31.6)     | 674.8 (-2228 to 2686.3)    | -63.9 (-121.9 to -32)   |
|                                      |             | Deaths                    | 12.3 (6.3 to 20.1)        | 11 (5.4 to 18.7)          | 13.7 (7 to 22.4)         | 24.7 (18.4 to 32.2)       | 24.4 (17.7 to 32.4)       | 25 (17.5 to 33.6)         | 101.4 (30.5 to 271.6)   | 123 (38.6 to 324.9)        | 82.5 (15.3 to 233.4)    |
|                                      |             | DALYs                     | 287.9 (143.3 to 476.6)    | 263.7 (126.4 to 447.8)    | 313.1 (158.9 to 517.4)   | 557.6 (417.5 to 724.5)    | 575.5 (421.6 to 751.5)    | 539.9 (381.1 to 727.1)    | 93.7 (24.3 to 264)      | 118.2 (34 to 324.8)        | 72.4 (7.7 to 215.8)     |
| Diet high in red meat                |             | YLLs                      | 259.6 (129.7 to 431.3)    | 233.5 (111.8 to 397.1)    | 286.8 (142 to 479.6)     | 487.3 (353.7 to 647)      | 491 (345.6 to 659.4)      | 484 (334.3 to 670.1)      | 87.7 (17.2 to 257.7)    | 110.3 (27 to 318.3)        | 68.7 (5.2 to 211.6)     |
|                                      |             | YLDs                      | 28.3 (14.4 to 47.7)       | 30.3 (14.7 to 52.4)       | 26.3 (13.2 to 43.3)      | 70.3 (49.1 to 93.8)       | 84.4 (57.9 to 113)        | 55.9 (39.4 to 73.9)       | 148.4 (69.8 to 328.7)   | 179 (83.1 to 401.2)        | 112.9 (48.1 to 275.2)   |
|                                      |             | Deaths                    | 3.5 (1.3 to 5.7)          | 3.5 (1.2 to 5.9)          | 3.5 (1.2 to 6)           | 3.6 (1.3 to 5.6)          | 3.6 (1.3 to 5.8)          | 3.5 (1.3 to 5.8)          | 2.4 (-33.2 to 59.9)     | 2.7 (-36.6 to 66.6)        | 1.8 (-35.3 to 66.8)     |
|                                      |             | DALYs                     | 90.9 (31.3 to 148.3)      | 94.1 (32.3 to 155.9)      | 87.6 (30 to 149.7)       | 90.8 (33.1 to 143.8)      | 96.4 (35.1 to 155)        | 85.2 (32.7 to 138.9)      | -0.1 (-35.1 to 59.6)    | 2.5 (-35.9 to 64.8)        | -2.8 (-36.2 to 59.8)    |
| Diet high in sodium                  |             | YLLs                      | 81.3 (26.6 to 134.7)      | 82.7 (26.5 to 139.9)      | 79.9 (26.2 to 139.4)     | 78.2 (28.1 to 125)        | 81 (29.3 to 132.3)        | 75.3 (27 to 125)          | -3.8 (-38.7 to 61.2)    | -2 (-40.7 to 67.1)         | -5.7 (-40 to 61.1)      |
|                                      |             | YLDs                      | 9.6 (2.9 to 16.1)         | 11.4 (3.5 to 19.1)        | 7.7 (2.4 to 13)          | 12.6 (3.8 to 20.6)        | 15.4 (4.5 to 25.4)        | 9.9 (3.2 to 16.2)         | 31.7 (5.1 to 64.3)      | 35.1 (4.4 to 68.7)         | 27.3 (1.9 to 63.7)      |
|                                      |             | Deaths                    | 2.3 (0.3 to 9.4)          | 1.7 (0.3 to 7.2)          | 3 (0.3 to 12.4)          | 1.9 (0.3 to 7.7)          | 1.3 (0.3 to 5.5)          | 2.5 (0.2 to 10.2)         | -16.8 (-53.9 to 51.4)   | -20.1 (-63.7 to 73.6)      | -15.3 (-54.6 to 92.7)   |
|                                      |             | DALYs                     | 54.9 (6.6 to 225.9)       | 40.4 (6.8 to 173.1)       | 69.8 (5 to 278.9)        | 43.8 (5.7 to 173.3)       | 31.6 (5.8 to 134.2)       | 56.2 (4.5 to 226.8)       | -20.4 (-55.3 to 47.4)   | -21.7 (-63.6 to 89.5)      | -19.5 (-53.4 to 72.4)   |
| Diet low in fiber                    |             | YLLs                      | 49.9 (6 to 206.2)         | 36 (6.1 to 154.4)         | 64.2 (4.6 to 255.6)      | 38.6 (4.9 to 153.3)       | 27.1 (4.9 to 115)         | 50.5 (4 to 206.2)         | -22.5 (-57.5 to 44.6)   | -24.6 (-65.3 to 80.8)      | -21.3 (-55.3 to 69.2)   |
|                                      |             | YLDs                      | 5.1 (0.6 to 20.2)         | 4.5 (0.7 to 18.6)         | 5.7 (0.4 to 22.4)        | 5.1 (0.6 to 20.3)         | 4.5 (0.8 to 18.9)         | 5.7 (0.4 to 22.3)         | 0.9 (-41 to 89.4)       | 1.3 (-54 to 130)           | 0.7 (-37.6 to 92)       |
|                                      |             | Deaths                    | 0.5 (0.3 to 0.9)          | 0.4 (0.2 to 0.8)          | 0.5 (0.3 to 1)           | 0.3 (0.2 to 0.6)          | 0.3 (0.2 to 0.6)          | 0.3 (0.2 to 0.6)          | -29.3 (-54.1 to -0.4)   | -27.6 (-56 to 11.2)        | -31.9 (-59.8 to 6.8)    |
|                                      |             | DALYs                     | 8.6 (5.2 to 14.7)         | 8.3 (5.1 to 14.5)         | 8.9 (5.2 to 16.5)        | 6.4 (4.3 to 10.6)         | 6.4 (4.3 to 11)           | 6.4 (4.1 to 10.8)         | -25.7 (-46.2 to -0.6)   | -22.7 (-46.5 to 7.5)       | -28.9 (-52.7 to 2)      |
| Diet low in fruits                   |             | YLLs                      | 7.8 (4.7 to 13.4)         | 7.4 (4.4 to 12.9)         | 8.2 (4.6 to 15)          | 5.6 (3.7 to 9.4)          | 5.5 (3.6 to 9.3)          | 5.7 (3.6 to 9.8)          | -28 (-48.9 to -1.2)     | -25.5 (-49.6 to 6.6)       | -30.6 (-55.6 to 1.7)    |
|                                      |             | YLDs                      | 0.8 (0.5 to 1.5)          | 0.9 (0.5 to 1.7)          | 0.7 (0.4 to 1.3)         | 0.8 (0.5 to 1.4)          | 0.9 (0.5 to 1.7)          | 0.7 (0.4 to 1.2)          | -3.9 (-21.4 to 14)      | 0.2 (-22.4 to 26.8)        | -8.7 (-31.1 to 14.6)    |
|                                      |             | Deaths                    | 6.7 (3 to 11.6)           | 6.8 (3.1 to 11.6)         | 6.6 (2.9 to 12.1)        | 2.3 (1 to 4)              | 2.5 (1.1 to 4.6)          | 2.1 (0.9 to 3.9)          | -65.6 (-80.6 to -44.4)  | -63.3 (-80 to -39.8)       | -68 (-83.8 to -44.7)    |
|                                      |             | DALYs                     | 167 (77.1 to 285.7)       | 174.6 (80 to 299.6)       | 159.3 (69.6 to 288.2)    | 54 (24.6 to 94.5)         | 61.3 (27.4 to 109.7)      | 46.5 (20.6 to 86.1)       | -67.7 (-81.5 to -46.2)  | -64.9 (-81.1 to -40.9)     | -70.8 (-84.4 to -48.4)  |
| Diet low in vegetables               |             | YLLs                      | 151.1 (69.9 to 262.8)     | 155.5 (70.8 to 269.4)     | 146.6 (64.2 to 270.9)    | 46.8 (21.8 to 82.4)       | 52.1 (23.4 to 92.7)       | 41.3 (18.4 to 76.7)       | -69.1 (-82.6 to -46.9)  | -66.5 (-82.5 to -41.5)     | -71.8 (-85.3 to -49.1)  |
|                                      |             | YLDs                      | 15.9 (6 to 29.1)          | 19 (7.1 to 34.6)          | 12.7 (4.7 to 23.2)       | 7.2 (2.5 to 13.2)         | 9.2 (3.1 to 17.8)         | 5.2 (1.8 to 9.9)          | -54.6 (-70.5 to -33.4)  | -51.7 (-69.9 to -29.3)     | -58.9 (-75.1 to -36.1)  |
|                                      |             | Deaths                    | 3.9 (1.3 to 7.1)          | 3.8 (1.1 to 7)            | 4 (1.3 to 7.6)           | 1.3 (0.3 to 2.6)          | 1.2 (0.3 to 2.4)          | 1.3 (0.3 to 2.7)          | -68 (-86.5 to -33)      | -69.1 (-87.8 to -32)       | -67 (-86.6 to -25.3)    |
|                                      |             | DALYs                     | 93.7 (27.7 to 173.1)      | 94.2 (25.7 to 173.7)      | 93.3 (28.5 to 178.7)     | 24.9 (6 to 52.8)          | 24.4 (5.6 to 53.3)        | 25.5 (6 to 53.5)          | -73.4 (-90.2 to -38.1)  | -74.1 (-91 to -36.5)       | -72.6 (-89.9 to -34.8)  |
| Diet low in whole grains             |             | YLLs                      | 85 (23.9 to 159.1)        | 84.2 (21.9 to 158)        | 86.1 (25 to 167.5)       | 21.9 (5.3 to 46.5)        | 20.8 (5 to 45.4)          | 22.9 (5.5 to 48.6)        | -74.3 (-90.5 to -39.7)  | -75.2 (-91.6 to -37.8)     | -73.4 (-90.4 to -34.5)  |
|                                      |             | YLDs                      | 8.7 (2.7 to 15.5)         | 10.1 (3.1 to 17.9)        | 7.2 (2.2 to 12.8)        | 3.1 (0.6 to 6.7)          | 3.5 (0.7 to 8)            | 2.6 (0.5 to 5.8)          | -64.5 (-85.5 to -29.9)  | -65.1 (-86.3 to -28.9)     | -63.7 (-86.2 to -28.6)  |
|                                      |             | Deaths                    | 6.5 (3.9 to 9)            | 6.6 (3.8 to 9.5)          | 6.3 (3.6 to 9.4)         | 7.5 (4.3 to 10.4)         | 7.6 (4.3 to 10.5)         | 7.5 (4.1 to 10.7)         | 16.4 (-9.8 to 41.3)     | 15.2 (-11.7 to 48.1)       | 17.6 (-15.3 to 53.5)    |
|                                      |             | DALYs                     | 128.5 (73.3 to 177.7)     | 134.7 (75 to 192.9)       | 122.3 (65.9 to 175.8)    | 150.7 (80.8 to 207.1)     | 158.8 (84.2 to 222)       | 142.6 (76.4 to 205.1)     | 17.3 (-9.1 to 42.6)     | 17.9 (-8.5 to 49.9)        | 16.6 (-14.7 to 51.4)    |
| High body-mass index                 |             | YLLs                      | 107.9 (62.3 to 151.9)     | 110.1 (60.7 to 162.1)     | 105.7 (57.5 to 156.3)    | 127.7 (67.8 to 181.8)     | 130.7 (69.3 to 185.6)     | 124.8 (65.7 to 180.6)     | 18.4 (-12 to 49.2)      | 18.7 (-13 to 58.9)         | 18.1 (-16.7 to 59.7)    |
|                                      |             | YLDs                      | 20.7 (10.9 to 30)         | 24.6 (13 to 35.6)         | 16.6 (8.5 to 24.3)       | 23 (11.7 to 33.4)         | 28.1 (14.5 to 41.2)       | 17.8 (9 to 25.9)          | 11.4 (4.1 to 18.7)      | 14.3 (4.4 to 24.6)         | 7.5 (-2 to 17.4)        |
|                                      |             | Deaths                    | 21.4 (12.1 to 32.9)       | 24.7 (14.1 to 38.5)       | 18 (8.7 to 29.5)         | 23.8 (13.8 to 35.8)       | 26.6 (15.9 to 40.4)       | 21 (11 to 33.7)           | 11.4 (-18.6 to 58.4)    | 7.6 (-23.6 to 53.5)        | 16.5 (-21.5 to 82)      |
|                                      |             | DALYs                     | 662.1 (393.9 to 988.5)    | 779.8 (470.2 to 1173.7)   | 542.1 (272.4 to 874.3)   | 695.1 (432.3 to 999.1)    | 803.6 (514.4 to 1164.8)   | 585.2 (333.4 to 907.4)    | 5 (-22.1 to 48.4)       | 3.1 (-25.2 to 45.4)        | 7.9 (-27.3 to 68.4)     |
| High fasting plasma glucose          |             | YLLs                      | 595 (344.8 to 904.5)      | 691.6 (410.5 to 1056.2)   | 496.5 (246.2 to 818.8)   | 599.8 (360.3 to 884.7)    | 679.2 (417.2 to 1008.8)   | 519.2 (287.6 to 824.7)    | 0.8 (-27.8 to 46.7)     | -1.8 (-31.3 to 43.3)       | 4.6 (-31.1 to 66)       |
|                                      |             | YLDs                      | 67.1 (37.9 to 103.9)      | 88.3 (51.5 to 133.5)      | 45.6 (22.6 to 73.5)      | 95.3 (58.8 to 137.5)      | 124.4 (78.6 to 177.5)     | 66 (38.5 to 99.9)         | 42 (22.3 to 77.4)       | 41 (20.5 to 72.1)          | 44.8 (18.1 to 107)      |
|                                      |             | Deaths                    | 19.2 (11.1 to 35.3)       | 19.6 (10.4 to 39.6)       | 18.7 (11.1 to 32.2)      | 38 (20.3 to 69.3)         | 37.3 (19.7 to 69.7)       | 38.8 (20.8 to 69.7)       | 98.5 (36.6 to 176)      | 90.4 (22.1 to 188.7)       | 107.6 (37.5 to 198)     |
|                                      |             | DALYs                     | 364.3 (233.2 to 605.9)    | 374.3 (222.5 to 668.9)    | 353.5 (227.8 to 574.9)   | 720.2 (429.3 to 1202.1)   | 728.1 (427.4 to 1237.1)   | 712.8 (418.2 to 1158.7)   | 97.7 (40.1 to 173.2)    | 94.5 (24.7 to 183.9)       | 101.6 (37.4 to 184.4)   |
| High LDL cholesterol                 |             | YLLs                      | 331 (211.8 to 554.8)      | 335.2 (196 to 599.5)      | 326.4 (207.7 to 535)     | 640.9 (378.3 to 1048.2)   | 632.8 (370.2 to 1074.2)   | 649.8 (374.2 to 1067.4)   | 93.6 (34.9 to 170.3)    | 88.8 (19.8 to 181)         | 99.1 (33.3 to 184.9)    |
|                                      |             | YLDs                      | 33.3 (18.5 to 57.8)       | 39.1 (20.8 to 69.8)       | 27.2 (15.7 to 46.3)      | 79.3 (42.9 to 136.4)      | 95.3 (51.2 to 165.4)      | 63 (33.2 to 106.8)        | 138.3 (86.9 to 201.6)   | 143.5 (74.6 to 224.5)      | 131.7 (75.5 to 194.2)   |
|                                      |             | Deaths                    | 14.1 (4.7 to 31.7)        | 15.2 (5.2 to 35)          | 12.8 (4.6 to 28.5)       | 17.7 (6.6 to 38.5)        | 19.2 (7.1 to 41.7)        | 16.2 (5.7 to 35.2)        | 25.7 (-3.6 to 58)       | 26.5 (-3.4 to 70.7)        | 26 (-12.5 to 67.3)      |
|                                      |             | DALYs                     | 297.6 (163.7 to 544.6)    | 330.1 (180.2 to 605)      | 263.3 (139.8 to 490)     | 378.2 (204.9 to 661.9)    | 428.3 (236.6 to 736.2)    | 326.8 (165.2 to 608.9)    | 27.1 (-1.6 to 60.2)     | 29.8 (-2 to 68.8)          | 24.1 (-10.6 to 63.7)    |
| High systolic blood pressure         |             | YLLs                      | 244.9 (125.9 to 466.4)    | 264.5 (130.6 to 516.2)    | 223.9 (112.1 to 438.7)   | 315.1 (158.8 to 568.4)    | 347.7 (178.9 to 625.5)    | 281.7 (136.8 to 541)      | 28.7 (-5.6 to 70.9)     | 31.4 (-5.7 to 82.9)        | 25.8 (-15.2 to 73.7)    |
|                                      |             | YLDs                      | 52.8 (32.2 to 85.7)       | 65.6 (39.8 to 106.1)      | 39.4 (23.2 to 64.8)      | 63.1 (38.4 to 100.7)      | 80.7 (49.2 to 127.5)      | 45.1 (27 to 72.9)         | 19.4 (11.9 to 28.8)     | 23 (12.2 to 35.8)          | 14.5 (3.1 to 27.5)      |
|                                      |             | Deaths                    | 78.4 (57.7 to 101)        | 85.4 (61 to 111.5)        | 70.7 (51.2 to 99.4)      | 65.8 (49 to 86.2)         | 70.6 (51.7 to 94.2)       | 60.8 (43 to 85.5)         | -16.1 (-34.9 to 6.5)    | -17.4 (-38.6 to 9)         | -14 (-36.5 to 14.5)     |
|                                      |             | DALYs                     | 1684.8 (1300.5 to 2108.9) | 1860.1 (1385.4 to 2357.5) | 1501.6 (1133 to 1989.8)  | 1360.9 (1030.4 to 1725.8) | 1492.6 (1142.5 to 1945.3) | 1224.7 (897.1 to 1630.3)  | -19.2 (-36.9 to 1.7)    | -19.8 (-40 to 5.4)         | -18.4 (-39.6 to 6.9)    |
|                                      | YLLs        | 1524.8 (1146.9 to 1926.8) | 1659.9 (1199.8 to 2145.7) | 1383.2 (1017.3 to 1858.2) | 1199.1 (895.1 to 1547.2) | 1288.6 (951.3 to 1722.7)  | 1106.2 (783.7 to 1494.6)  | -21.4 (-40.4 to 2.1)      | -22.4 (-43.9 to 4.6)    | -20 (-42.4 to 7.5)         |                         |

| Location         | Risk factor                              | Measure                | 1990                      |                         |                           | 2019                      |                           |                           | % Change (1990 to 2019)  |                          |                          |
|------------------|------------------------------------------|------------------------|---------------------------|-------------------------|---------------------------|---------------------------|---------------------------|---------------------------|--------------------------|--------------------------|--------------------------|
|                  |                                          |                        | Both                      | Female                  | Male                      | Both                      | Female                    | Male                      | Both                     | Female                   | Male                     |
|                  | High temperature                         | YLDs                   | 160 (115 to 207.8)        | 200.2 (141.1 to 259.6)  | 118.4 (82.7 to 155.3)     | 161.8 (115 to 211.2)      | 204 (141.3 to 266.6)      | 118.5 (83.7 to 155)       | 1.1 (-8.5 to 11.7)       | 1.9 (-11.6 to 17.6)      | 0.1 (-12 to 13.9)        |
|                  |                                          | Deaths                 | 0.7 (-0.1 to 2.1)         | 0.7 (-0.1 to 2.1)       | 0.7 (-0.1 to 2.1)         | 0.6 (0 to 1.7)            | 0.6 (0 to 1.7)            | 0.6 (0 to 1.7)            | -10.4 (-158.8 to 145.5)  | -10.7 (-156.9 to 143)    | -10.3 (-157.6 to 152.9)  |
|                  |                                          | YLLs                   | 13.4 (-2.3 to 38)         | 13.5 (-2.4 to 39.9)     | 13.2 (-2.4 to 37.5)       | 11 (0.2 to 28.9)          | 11 (0.2 to 28.2)          | 10.9 (0.2 to 28.3)        | -18 (-153.2 to 123)      | -18.4 (-151.5 to 113.3)  | -17.6 (-155.3 to 124.7)  |
|                  | Household air pollution from solid fuels | Deaths                 | 18.5 (10.5 to 29)         | 20.2 (12 to 31.3)       | 16.7 (8.6 to 27.8)        | 1.6 (0.7 to 3.1)          | 1.9 (0.8 to 3.6)          | 1.3 (0.5 to 2.7)          | -91.5 (-96 to -84.1)     | -90.8 (-95.6 to -82.6)   | -92.5 (-96.6 to -85.1)   |
|                  |                                          | DALYs                  | 433.6 (250.3 to 662.5)    | 485.7 (293.9 to 740.6)  | 379.7 (195.9 to 623.8)    | 35.6 (15.6 to 69.3)       | 44 (19.1 to 85)           | 27.1 (10.4 to 57.8)       | -91.8 (-96.2 to -84.5)   | -90.9 (-95.7 to -82.8)   | -92.9 (-96.8 to -85.7)   |
|                  |                                          | YLLs                   | 389.6 (223.3 to 602)      | 430 (259.5 to 663.7)    | 347.9 (179.8 to 575.1)    | 31 (13.3 to 60.8)         | 37.5 (15.8 to 74)         | 24.3 (9.1 to 52.6)        | -92 (-96.3 to -84.8)     | -91.3 (-95.9 to -83.3)   | -93 (-96.9 to -85.8)     |
|                  | Kidney dysfunction                       | YLDs                   | 43.9 (23.8 to 67.6)       | 55.7 (31.6 to 85.1)     | 31.8 (15.7 to 50.5)       | 4.6 (2 to 9)              | 6.4 (2.8 to 12.5)         | 2.8 (1.1 to 5.8)          | -89.5 (-94.8 to -80.5)   | -88.5 (-94.4 to -78.9)   | -91.2 (-96 to -82.9)     |
|                  |                                          | Deaths                 | 8.9 (6.2 to 12.5)         | 9.7 (6.3 to 14)         | 8.1 (5.6 to 11.8)         | 12.5 (7.7 to 17)          | 12.7 (7.4 to 17.7)        | 12.4 (7.5 to 17.2)        | 40.9 (2.9 to 81.9)       | 31.1 (-6.2 to 75.9)      | 53.4 (7.7 to 104.2)      |
|                  |                                          | DALYs                  | 190.2 (144.9 to 249)      | 213.2 (152.7 to 287.1)  | 166.6 (124.2 to 232.5)    | 260.8 (185 to 334.2)      | 277.1 (194.4 to 359.9)    | 244.4 (169.3 to 322.8)    | 37.1 (3.5 to 72.3)       | 30 (-2.6 to 69.5)        | 46.8 (8.2 to 90.7)       |
|                  | Lead exposure                            | YLLs                   | 170.1 (125.4 to 226.8)    | 187.5 (132.1 to 258)    | 152.2 (111.2 to 216.1)    | 228.9 (161 to 297.1)      | 237 (160.1 to 315.5)      | 220.9 (147.7 to 295.1)    | 34.5 (-2.2 to 74.4)      | 26.4 (-9.3 to 72.3)      | 45.1 (3.1 to 93.1)       |
|                  |                                          | YLDs                   | 20 (13.7 to 27)           | 25.6 (17.5 to 34.8)     | 14.3 (9.7 to 19.4)        | 31.9 (21.7 to 43.1)       | 40.1 (27.3 to 54.1)       | 23.5 (16.2 to 32.2)       | 59.3 (45.1 to 74.4)      | 56.5 (41.3 to 72.9)      | 64.3 (44.6 to 85.1)      |
|                  |                                          | Deaths                 | 5.9 (3.1 to 9.3)          | 5 (2.4 to 8.4)          | 6.8 (3.7 to 10.7)         | 4.7 (2.4 to 7.4)          | 3.8 (1.6 to 6.5)          | 5.5 (3.1 to 8.8)          | -20.7 (-39.9 to 1.3)     | -24.1 (-44.2 to -1.2)    | -18.6 (-40.2 to 7.4)     |
|                  | Low physical activity                    | DALYs                  | 128.1 (66.3 to 199.5)     | 110.2 (49.7 to 181.2)   | 146.7 (80.7 to 228.1)     | 86 (41.7 to 138.9)        | 70.9 (27.6 to 126.3)      | 101.6 (54.4 to 161.3)     | -32.9 (-49.7 to -14.3)   | -35.7 (-54.6 to -17)     | -30.8 (-49.8 to -8.9)    |
|                  |                                          | YLLs                   | 116.5 (60.1 to 183.8)     | 98.6 (44.1 to 164)      | 135.3 (73.2 to 213.8)     | 77.1 (37.5 to 125.4)      | 62 (24.5 to 111.1)        | 92.7 (48.6 to 148.5)      | -33.9 (-51.4 to -13.3)   | -37.1 (-56.6 to -16.3)   | -31.5 (-51.8 to -7.6)    |
|                  |                                          | YLDs                   | 11.5 (5.7 to 18.6)        | 11.6 (4.9 to 19.5)      | 11.4 (6.1 to 18)          | 8.9 (3.9 to 15.3)         | 8.9 (3.2 to 16)           | 8.9 (4.2 to 14.6)         | -23 (-37.5 to -12.7)     | -23.8 (-43.1 to -10.9)   | -22.2 (-35.6 to -10.1)   |
|                  | Low temperature                          | Deaths                 | 6.4 (1.4 to 13.7)         | 6.5 (1.5 to 14)         | 6.3 (1.3 to 13.7)         | 8.2 (1.8 to 16.7)         | 8.4 (2 to 17)             | 8 (1.5 to 16.9)           | 28.1 (-0.4 to 61.5)      | 28.2 (-2.4 to 73.9)      | 27.8 (-6.9 to 69.2)      |
|                  |                                          | DALYs                  | 97.6 (20.2 to 218.6)      | 102.8 (21.1 to 233.5)   | 92.4 (17 to 215.3)        | 126.5 (25.2 to 277.9)     | 133.4 (29.2 to 298.2)     | 119.4 (21.1 to 266.9)     | 29.5 (2 to 60.6)         | 29.8 (-0.7 to 70.6)      | 29.2 (-5.9 to 69.6)      |
|                  |                                          | YLLs                   | 85 (17.6 to 189)          | 87.6 (18.5 to 196.6)    | 82.5 (14.7 to 190.5)      | 110.8 (22.6 to 241.2)     | 114.1 (25.8 to 250.8)     | 107.5 (18.7 to 242.7)     | 30.3 (-0.9 to 64.3)      | 30.2 (-4.1 to 77.5)      | 30.3 (-8.3 to 74.1)      |
|                  | Secondhand smoke                         | YLDs                   | 12.6 (2.3 to 32)          | 15.1 (3 to 37.6)        | 9.9 (1.6 to 26.1)         | 15.6 (2.9 to 38.7)        | 19.3 (3.7 to 46.7)        | 11.9 (2 to 30)            | 24.1 (11.9 to 42)        | 27.4 (12 to 49.7)        | 20 (2.3 to 44.2)         |
|                  |                                          | Deaths                 | 9.7 (6 to 14.7)           | 9.7 (5.9 to 14.7)       | 9.7 (5.9 to 15)           | 8.5 (5.4 to 12.9)         | 8.4 (5.2 to 12.6)         | 8.5 (5.2 to 13.2)         | -12.2 (-29.5 to 8.6)     | -12.6 (-31.9 to 12.1)    | -12 (-33 to 11.5)        |
| YLLs             |                                          | 180.7 (111.6 to 271.2) | 183 (113.7 to 280.5)      | 178.5 (109.1 to 274.8)  | 145.2 (90.2 to 218.3)     | 146.3 (88.8 to 220)       | 144.2 (88.7 to 222.5)     | -19.6 (-37.7 to 0.6)      | -20 (-39.1 to 4)         | -19.2 (-39.8 to 4.1)     |                          |
| Smoking          | Deaths                                   | 4.8 (3.3 to 6.5)       | 5.5 (3.7 to 7.5)          | 4.1 (2.7 to 5.9)        | 3.3 (2.2 to 4.4)          | 3.6 (2.4 to 5)            | 2.9 (1.9 to 4.3)          | -31.6 (-47.8 to -13.8)    | -33.9 (-50.5 to -14.2)   | -28.2 (-47.9 to -6.4)    |                          |
|                  | DALYs                                    | 115.4 (80.1 to 153.7)  | 140.6 (96.6 to 190.5)     | 89.5 (60 to 127.5)      | 76.1 (52.3 to 103.5)      | 90.1 (59.4 to 125.2)      | 62 (40.1 to 87.9)         | -34.1 (-50.5 to -14.7)    | -35.9 (-53 to -14.2)     | -30.8 (-50.5 to -8.6)    |                          |
|                  | YLLs                                     | 108.1 (74 to 145.2)    | 130.4 (88.3 to 178.5)     | 85.1 (56.3 to 122.3)    | 69.9 (47.4 to 95.5)       | 81.5 (52.2 to 115.6)      | 58.1 (36.9 to 83.4)       | -35.4 (-52.7 to -14.7)    | -37.5 (-55.3 to -14.6)   | -31.7 (-52.1 to -8.7)    |                          |
| All risk factors | YLDs                                     | 7.3 (4.7 to 10.2)      | 10.2 (6.6 to 14.1)        | 4.4 (2.9 to 6.2)        | 6.2 (4.1 to 8.7)          | 8.6 (5.5 to 12)           | 3.8 (2.5 to 5.4)          | -15.2 (-22 to -7.9)       | -15.8 (-24.3 to -7.1)    | -12.6 (-23.6 to 0.3)     |                          |
|                  | Deaths                                   | 12.1 (9.4 to 15.6)     | 2.4 (1.6 to 3.4)          | 22.3 (17 to 29.1)       | 7.3 (5.4 to 9.5)          | 1.3 (0.9 to 1.8)          | 13.6 (9.9 to 17.9)        | -39.4 (-55.9 to -20.2)    | -44.8 (-62.9 to -17.3)   | -39 (-56 to -18.3)       |                          |
|                  | DALYs                                    | 326.5 (256.4 to 422.8) | 68.7 (47.6 to 97.4)       | 590.6 (458.5 to 778.2)  | 192.6 (143.6 to 248.6)    | 36.9 (25.2 to 53)         | 351.2 (256.8 to 462)      | -41 (-56.8 to -22.1)      | -46.3 (-64.8 to -19.9)   | -40.5 (-56.8 to -21)     |                          |
| Oman             | All risk factors                         | YLLs                   | 296.8 (226.2 to 386.2)    | 60.5 (41 to 87.3)       | 539 (406.2 to 713.9)      | 170.4 (122.4 to 225.3)    | 31.3 (20.5 to 46.1)       | 312.3 (220.5 to 420.3)    | -42.6 (-59.3 to -22)     | -48.3 (-67.4 to -20.6)   | -42.1 (-58.7 to -20.7)   |
|                  |                                          | YLDs                   | 29.7 (21.2 to 38.4)       | 8.2 (5.3 to 11.9)       | 51.6 (37 to 66.6)         | 22.2 (16 to 28.8)         | 5.7 (3.7 to 8)            | 39 (27.8 to 50.5)         | -25.2 (-32.7 to -16.1)   | -31.2 (-50.2 to -3.1)    | -24.5 (-32.4 to -15)     |
|                  |                                          | Deaths                 | 114 (86.4 to 146.6)       | 102.9 (75.4 to 136.3)   | 129.2 (95.8 to 168.2)     | 87.7 (74.8 to 102.8)      | 82.1 (67.6 to 97.8)       | 95.2 (78.2 to 116.2)      | -23.1 (-41.6 to 4.8)     | -20.2 (-42.1 to 14.6)    | -26.4 (-46.4 to 3.8)     |
|                  | Alcohol use                              | DALYs                  | 2408.2 (1845.8 to 3129.9) | 2220 (1681.2 to 2854.9) | 2622.7 (1948.6 to 3398.3) | 1610.3 (1402.6 to 1845.1) | 1591.6 (1358.3 to 1856.5) | 1659.3 (1382.2 to 1975.8) | -33.1 (-48 to -12.1)     | -28.3 (-46.3 to -1.3)    | -36.7 (-53.2 to -12.7)   |
|                  |                                          | YLLs                   | 2199.7 (1631.6 to 2894.6) | 1993.1 (1459 to 2631.8) | 2427.3 (1747.5 to 3208.1) | 1404.2 (1208 to 1625.8)   | 1355.6 (1126.4 to 1606.1) | 1473.6 (1214.7 to 1784.8) | -36.2 (-51.7 to -13.3)   | -32 (-51.5 to -2.5)      | -39.3 (-56.1 to -13.8)   |
|                  |                                          | YLDs                   | 208.5 (150.3 to 266.4)    | 227 (164.6 to 288.6)    | 195.5 (141.3 to 252.7)    | 206.2 (150.9 to 262.4)    | 236 (172.8 to 303.6)      | 185.7 (133.4 to 238.6)    | -1.1 (-6.7 to 5.1)       | 4 (-4.4 to 12.8)         | -5 (-13 to 2.6)          |
|                  | Ambient particulate matter pollution     | Deaths                 | 0 (-0.2 to 0.3)           | -0.1 (-0.2 to 0.1)      | 0.1 (-0.4 to 0.6)         | 0 (-0.2 to 0.2)           | -0.1 (-0.2 to 0)          | 0 (-0.3 to 0.4)           | -280.6 (-584.6 to 980.3) | 68.1 (-649.1 to 950)     | -90.6 (-565.1 to 314.7)  |
|                  |                                          | DALYs                  | 2.2 (-4.4 to 9.6)         | -1.2 (-3.9 to 2)        | 4.4 (-7.2 to 17.9)        | 0.4 (-4.2 to 5.3)         | -2 (-4.3 to 0.4)          | 1.9 (-6 to 10.3)          | -82.9 (-661.9 to 391.3)  | 72.6 (-1161.7 to 1021.4) | -56.2 (-503.7 to 421.2)  |
|                  |                                          | YLLs                   | 2.4 (-3.7 to 9.4)         | -0.8 (-3.3 to 2.1)      | 4.5 (-6.2 to 16.9)        | 0.5 (-3.3 to 4.8)         | -1.5 (-3.5 to 0.6)        | 1.8 (-5 to 9.2)           | -78.4 (-637.7 to 332.6)  | 92 (-958.8 to 1141.8)    | -59.2 (-423.8 to 254.9)  |
|                  | Diet high in red meat                    | YLDs                   | -0.2 (-0.8 to 0.5)        | -0.4 (-0.8 to -0.1)     | -0.1 (-1.1 to 1.1)        | -0.1 (-0.9 to 0.6)        | -0.5 (-1 to -0.1)         | 0.1 (-1 to 1.4)           | -27.7 (-376.7 to 565.4)  | 35.8 (-3.4 to 97.2)      | -316.1 (-597.4 to 412.8) |
|                  |                                          | Deaths                 | 22 (11.9 to 34.7)         | 18.1 (9.2 to 29.7)      | 26.7 (14.3 to 42.5)       | 25.4 (19 to 32.5)         | 23.9 (17.6 to 31.2)       | 27.3 (20 to 36.3)         | 15.4 (-22.3 to 99)       | 32.4 (-13.6 to 145.6)    | 2.2 (-33.5 to 76.5)      |
|                  |                                          | DALYs                  | 505 (271.7 to 797.7)      | 422.4 (213 to 689.2)    | 586.5 (316.7 to 925.2)    | 515.7 (388.7 to 651.2)    | 516.1 (394.1 to 655.5)    | 526.4 (389.9 to 687.1)    | 2.1 (-30.9 to 69.8)      | 22.2 (-20.4 to 123.9)    | -10.3 (-41.5 to 53.4)    |
|                  | Diet high in sodium                      | YLLs                   | 459.8 (240 to 735.5)      | 377.2 (188.8 to 632.7)  | 540.5 (288.7 to 867.9)    | 443.6 (332 to 561.1)      | 432.8 (318.7 to 555.4)    | 461.1 (338.3 to 603.8)    | -3.5 (-35.6 to 65.2)     | 14.7 (-26.3 to 118.4)    | -14.7 (-45.4 to 47.9)    |
|                  |                                          | YLDs                   | 45.2 (23.6 to 71.2)       | 45.2 (22.6 to 73.3)     | 46 (24.4 to 70.9)         | 72.1 (49.9 to 98.7)       | 83.3 (58.5 to 115.3)      | 65.2 (44.9 to 89.6)       | 59.5 (17.3 to 150.4)     | 84.4 (30.1 to 210.6)     | 41.7 (5.7 to 120.7)      |
|                  |                                          | Deaths                 | 6.4 (2.6 to 10.1)         | 6 (2.3 to 9.6)          | 6.9 (2.9 to 11.1)         | 4.9 (2.3 to 7.1)          | 4.7 (2.4 to 7.1)          | 5.1 (2.2 to 7.5)          | -23.4 (-46 to 12.7)      | -20.3 (-48 to 33.2)      | -25.9 (-49.4 to 13.8)    |
|                  |                                          | DALYs                  | 162.5 (68.7 to 256)       | 155.8 (62.2 to 248.4)   | 170 (71.3 to 270)         | 112.1 (56.9 to 157.9)     | 115.8 (60.1 to 167.8)     | 111.4 (51.5 to 160.3)     | -31 (-50.1 to 1.6)       | -25.7 (-49.1 to 19)      | -34.4 (-54.2 to -0.2)    |
|                  |                                          | YLLs                   | 146.8 (61.2 to 236.2)     | 137.9 (51.6 to 225.8)   | 155.6 (65.4 to 250.2)     | 94.2 (47.2 to 135.6)      | 94.6 (47.9 to 139.4)      | 95.4 (44 to 139.6)        | -35.9 (-54.6 to -3.1)    | -31.4 (-54.2 to 16.3)    | -38.7 (-58.9 to -3.8)    |
|                  |                                          | YLDs                   | 15.7 (6.1 to 24.4)        | 17.9 (7.4 to 27.8)      | 14.4 (5.3 to 22.8)        | 17.9 (8.2 to 27)          | 21.2 (10.1 to 32.4)       | 16.1 (7.1 to 24.4)        | 14.1 (0.2 to 45.5)       | 18.3 (0.7 to 54)         | 11.8 (-4.8 to 46.2)      |
|                  |                                          | Deaths                 | 2.4 (0.4 to 10.2)         | 1.6 (0.3 to 6.8)        | 3.3 (0.3 to 14)           | 1.6 (0.3 to 6.6)          | 1.1 (0.3 to 4.5)          | 2.1 (0.2 to 8.6)          | -34.2 (-60.5 to 34)      | -30.9 (-66.2 to 68.8)    | -37.1 (-64.7 to 50.5)    |
|                  |                                          | DALYs                  | 56.6 (6.9 to 241.4)       | 36.8 (6.8 to 166)       | 74.2 (5.9 to 324.3)       | 33.4 (4.6 to 136.8)       | 23.7 (4.6 to 99.5)        | 41.8 (4.1 to 173.1)       | -40.9 (-63.6 to 20.5)    | -35.6 (-69.8 to 59.1)    | -43.7 (-66.7 to 26)      |
| YLLs             |                                          | 51.8 (6.2 to 220.1)    | 33.1 (6 to 149.4)         | 68.5 (5.4 to 301.6)     | 28.9 (4 to 117.9)         | 20.1 (3.9 to 84.2)        | 36.6 (3.6 to 149.7)       | -44.2 (-66 to 17.4)       | -39.3 (-71.7 to 54.7)    | -46.6 (-69.2 to 22.3)    |                          |
|                  | All risk factors                         | YLDs                   | 4.8 (0.6 to 19.9)         | 3.7 (0.6 to 15.3)       | 5.7 (0.4 to 23.3)         | 4.5 (0.5 to 18.3)         | 3.6 (0.6 to 14.4)         | 5.2 (0.4 to 20.9)         | -5.4 (-39.8 to 68.9)     | -2.9 (-52.5 to 107.2)    | -8.7 (-39.3 to 86.1)     |

| Location                                 | Risk factor | Measure | 1990                     |                          |                          | 2019                    |                          |                         | % Change (1990 to 2019) |                        |                        |
|------------------------------------------|-------------|---------|--------------------------|--------------------------|--------------------------|-------------------------|--------------------------|-------------------------|-------------------------|------------------------|------------------------|
|                                          |             |         | Both                     | Female                   | Male                     | Both                    | Female                   | Male                    | Both                    | Female                 | Male                   |
| Diet low in fiber                        | Deaths      | Deaths  | 4.4 (0.9 to 8.9)         | 4 (0.8 to 8.1)           | 4.9 (1 to 9.5)           | 1.3 (0.3 to 2.7)        | 1.2 (0.3 to 2.7)         | 1.5 (0.4 to 3.2)        | -69.6 (-79.4 to -53.1)  | -70 (-82.2 to -49.6)   | -69.5 (-81 to -50.3)   |
|                                          |             | DALYs   | 100.1 (18.7 to 201.7)    | 94.3 (17.9 to 188.7)     | 106.9 (20.2 to 213.7)    | 25.8 (6.2 to 54.7)      | 24.8 (6 to 55.5)         | 27.1 (6.8 to 58.7)      | -74.3 (-82 to -61)      | -73.7 (-83.1 to -58)   | -74.6 (-83.7 to -60.9) |
|                                          |             | YLLs    | 90.3 (16.7 to 184.6)     | 83.1 (15.5 to 168.6)     | 97.8 (18.4 to 199.7)     | 21.8 (5.4 to 46.4)      | 20.3 (5 to 46)           | 23.5 (5.9 to 51.5)      | -75.8 (-83.3 to -62.7)  | -75.5 (-84.9 to -59.4) | -75.9 (-84.8 to -62)   |
|                                          |             | YLDs    | 9.8 (1.9 to 19.2)        | 11.2 (2 to 22.3)         | 9 (1.7 to 17.7)          | 3.9 (0.9 to 8.6)        | 4.5 (0.9 to 10.2)        | 3.6 (0.8 to 8.1)        | -60.1 (-69.7 to -48.6)  | -59.6 (-71.7 to -46)   | -60.1 (-71.3 to -47.8) |
| Diet low in fruits                       | Deaths      | Deaths  | 4.1 (2 to 6.7)           | 4.2 (2.1 to 7)           | 4 (1.8 to 6.9)           | 1.6 (0.8 to 2.7)        | 1.7 (0.8 to 3)           | 1.6 (0.6 to 3)          | -60.6 (-73.9 to -41.6)  | -59.3 (-75.8 to -33.5) | -61.4 (-77.8 to -35.6) |
|                                          |             | DALYs   | 101.6 (50.5 to 164.6)    | 107.8 (53.3 to 180.5)    | 97.6 (43.6 to 164.3)     | 35.2 (17.3 to 57.8)     | 40.4 (19.4 to 67.1)      | 32.2 (13.7 to 56.8)     | -65.4 (-76.3 to -50.7)  | -62.5 (-75.7 to -42.8) | -67.1 (-79.3 to -48.6) |
|                                          |             | YLLs    | 92.5 (46.1 to 152.6)     | 96.5 (47.3 to 164.4)     | 89.8 (40.6 to 151.6)     | 29.7 (14.9 to 48.2)     | 33.3 (16.1 to 55.7)      | 27.6 (12 to 49)         | -67.9 (-78.2 to -52.5)  | -65.5 (-78.2 to -44.6) | -69.3 (-81.1 to -50.4) |
|                                          |             | YLDs    | 9.1 (3.4 to 16.2)        | 11.3 (4.6 to 19.6)       | 7.8 (2.7 to 14.3)        | 5.5 (2 to 9.9)          | 7.1 (2.7 to 13.4)        | 4.6 (1.5 to 8.5)        | -40.2 (-50.7 to -28.8)  | -36.8 (-50.6 to -22.5) | -41.7 (-56.4 to -25.5) |
| Diet low in vegetables                   | Deaths      | Deaths  | 2.9 (0.8 to 5.8)         | 2.6 (0.6 to 5.8)         | 3.2 (1 to 6)             | 1.4 (0.4 to 2.7)        | 1.3 (0.3 to 2.7)         | 1.6 (0.4 to 3)          | -49.5 (-68.5 to -19.6)  | -49.7 (-70.2 to -9)    | -49.6 (-70 to -21.3)   |
|                                          |             | DALYs   | 62.3 (15.8 to 132.9)     | 57.2 (12.1 to 138.3)     | 67.2 (18.4 to 130.4)     | 28.6 (6.9 to 55.6)      | 27.4 (6.1 to 57.5)       | 30.1 (6.8 to 56.9)      | -54 (-70.6 to -28.1)    | -52.1 (-70.7 to -15.3) | -55.2 (-73.1 to -30.5) |
|                                          |             | YLLs    | 56.7 (14.2 to 123.7)     | 51.2 (10.3 to 129.2)     | 62 (16.9 to 123.5)       | 24.6 (6.2 to 47.7)      | 22.9 (5.2 to 48.7)       | 26.3 (6.1 to 49.2)      | -56.7 (-72.4 to -29.7)  | -55.3 (-73 to -16.7)   | -57.5 (-74.5 to -32)   |
|                                          |             | YLDs    | 5.5 (1.2 to 10.7)        | 6 (1.4 to 12.2)          | 5.2 (1.2 to 10.1)        | 4.1 (0.8 to 8.1)        | 4.5 (0.8 to 9.3)         | 3.8 (0.7 to 7.5)        | -26.6 (-45.7 to -10.7)  | -24.9 (-47.4 to -3.1)  | -27.3 (-46.7 to -12.9) |
| Diet low in whole grains                 | Deaths      | Deaths  | 4 (1.2 to 6.3)           | 2.6 (0.8 to 4.3)         | 5.6 (1.6 to 9)           | 3.1 (0.8 to 4.8)        | 2.4 (0.6 to 3.8)         | 3.9 (1 to 6.1)          | -21.5 (-42.5 to 6.5)    | -7.6 (-38.3 to 29.9)   | -30.8 (-50.8 to -2.7)  |
|                                          |             | DALYs   | 88.4 (25.1 to 138.7)     | 57.7 (16.1 to 91.7)      | 116.8 (32.8 to 188)      | 61.5 (15.1 to 93)       | 50 (12.1 to 77)          | 71.9 (17.5 to 110.7)    | -30.4 (-47.7 to -7.8)   | -13.3 (-38.6 to 12.7)  | -38.4 (-55.8 to -15.1) |
|                                          |             | YLLs    | 75.3 (21 to 119.7)       | 44.4 (12.1 to 72.7)      | 103.8 (29.2 to 171.3)    | 50 (12.5 to 76.5)       | 37.3 (9 to 58.7)         | 61 (15 to 96)           | -33.6 (-52.2 to -7.7)   | -16.1 (-44.3 to 19)    | -41.2 (-59.1 to -14.9) |
|                                          |             | YLDs    | 13 (3.3 to 20.8)         | 13.3 (3.4 to 21.3)       | 12.9 (3.3 to 21)         | 11.5 (2.9 to 18.8)      | 12.8 (3.1 to 21)         | 10.8 (2.7 to 17.7)      | -11.5 (-25.4 to -4.2)   | -4.2 (-20.9 to 6.9)    | -16.1 (-29.8 to -7.8)  |
| High body-mass index                     | Deaths      | Deaths  | 19.8 (10.3 to 32)        | 23.5 (13 to 37)          | 17 (7.3 to 29.6)         | 22.4 (14.1 to 31.8)     | 24.4 (15.7 to 34.3)      | 21 (12 to 30.9)         | 13.1 (-25.9 to 84.3)    | 4.1 (-33.8 to 65.9)    | 23.6 (-25.2 to 141.7)  |
|                                          |             | DALYs   | 603.9 (336.6 to 939)     | 737.4 (442.4 to 1122.6)  | 511.1 (241.6 to 854.6)   | 595.5 (401.5 to 804.2)  | 673.2 (468 to 893.9)     | 545.1 (343.1 to 786)    | -1.4 (-31.5 to 55.7)    | -8.7 (-38.1 to 37.4)   | 6.6 (-32.6 to 97.6)    |
|                                          |             | YLLs    | 547.2 (298.6 to 868.5)   | 657.3 (378.9 to 1019.4)  | 469.2 (217.9 to 794.3)   | 502.2 (331.6 to 686.7)  | 556.4 (376.9 to 750.1)   | 465.7 (289.3 to 678.7)  | -8.2 (-38.1 to 47.8)    | -15.3 (-44.6 to 32)    | -0.7 (-39.3 to 90.2)   |
|                                          |             | YLDs    | 56.8 (32.4 to 87.4)      | 80.1 (47.8 to 121.1)     | 41.9 (20.4 to 69.9)      | 93.3 (61.2 to 130.1)    | 116.8 (78.1 to 160.9)    | 79.4 (50.1 to 112.6)    | 64.3 (28 to 130.6)      | 45.7 (17.4 to 87.3)    | 89.4 (41.6 to 230.6)   |
| High fasting plasma glucose              | Deaths      | Deaths  | 25.9 (15.4 to 43.8)      | 24.4 (13.2 to 42.8)      | 28 (16.4 to 49.1)        | 33.2 (18.5 to 61.5)     | 30.2 (17.2 to 52.5)      | 37 (19 to 73.3)         | 28.5 (-16.6 to 95.7)    | 23.6 (-27.4 to 109.3)  | 32.1 (-16.2 to 104.9)  |
|                                          |             | DALYs   | 519.1 (324.9 to 832)     | 492.2 (280.9 to 834.6)   | 546.6 (336.4 to 888.8)   | 600.6 (370.3 to 978.1)  | 566.5 (345.4 to 900.7)   | 638.3 (362.4 to 1098.8) | 15.7 (-20.5 to 73.4)    | 15.1 (-28.8 to 87.5)   | 16.8 (-23.1 to 81.9)   |
|                                          |             | YLLs    | 475.4 (296.2 to 768.8)   | 444.9 (248.5 to 742)     | 506.7 (309 to 835.7)     | 528.7 (327.2 to 867.5)  | 490 (299.7 to 771.7)     | 570.5 (321 to 1001.3)   | 11.2 (-24.8 to 71.3)    | 10.1 (-33.3 to 86.3)   | 12.6 (-27.7 to 81)     |
|                                          |             | YLDs    | 43.7 (24.6 to 71)        | 47.3 (25.9 to 80)        | 39.9 (22.8 to 67.5)      | 71.9 (39.1 to 118.3)    | 76.5 (41.8 to 127.2)     | 67.8 (34.9 to 114.7)    | 64.5 (30.2 to 107.8)    | 61.7 (17.3 to 122.6)   | 69.7 (29 to 117.3)     |
| High LDL cholesterol                     | Deaths      | Deaths  | 15.8 (5.9 to 33.8)       | 11 (3.5 to 25.2)         | 21.7 (7.9 to 44.9)       | 16.1 (5 to 36)          | 13.1 (3.7 to 29.8)       | 19.3 (5.9 to 43.8)      | 1.9 (-30.5 to 40)       | 19.4 (-20.5 to 71.3)   | -11 (-41.9 to 26.5)    |
|                                          |             | DALYs   | 343.7 (182.9 to 619)     | 233.8 (115.5 to 443.7)   | 443.8 (228.1 to 782.4)   | 302.4 (146.3 to 570.7)  | 255.6 (118.8 to 472.2)   | 343.7 (163.1 to 649.1)  | -12 (-36.5 to 17.2)     | 9.3 (-18.8 to 44.1)    | -22.6 (-46.7 to 10.4)  |
|                                          |             | YLLs    | 291.1 (144.1 to 535.9)   | 178.2 (77.3 to 368.2)    | 393.4 (189.5 to 712.4)   | 245.5 (109.2 to 482)    | 190.4 (75.5 to 387.9)    | 292 (127.2 to 579.5)    | -15.7 (-43.5 to 18.7)   | 6.9 (-30.3 to 55.2)    | -25.8 (-52.4 to 11.5)  |
|                                          |             | YLDs    | 52.6 (30.4 to 86.9)      | 55.6 (32.5 to 90.4)      | 50.4 (29.1 to 83.6)      | 57 (33.5 to 94)         | 65.1 (38.3 to 105.7)     | 51.8 (29.9 to 86.4)     | 8.3 (-0.5 to 17.5)      | 17.1 (5 to 30.3)       | 2.7 (-8.5 to 13.2)     |
| High systolic blood pressure             | Deaths      | Deaths  | 54.7 (37.1 to 76.5)      | 51.3 (32.7 to 76.8)      | 58.7 (38.5 to 86.4)      | 50.9 (38.8 to 64.5)     | 51.2 (37.6 to 65.3)      | 51.4 (38.2 to 68.4)     | -6.9 (-33 to 32.5)      | -0.1 (-33.2 to 59.3)   | -12.5 (-40.2 to 31.2)  |
|                                          |             | DALYs   | 1205.7 (849.2 to 1659.2) | 1137.5 (742.6 to 1633.4) | 1271.2 (843.5 to 1787.1) | 986.4 (779.1 to 1209.1) | 1031.9 (806.3 to 1289.8) | 959.8 (734.5 to 1215.7) | -18.2 (-38.9 to 14)     | -9.3 (-36.5 to 37.8)   | -24.5 (-47.6 to 9.8)   |
|                                          |             | YLLs    | 1102.8 (761.5 to 1564.3) | 1025.7 (654.6 to 1510.5) | 1175.6 (766.7 to 1685.2) | 856.2 (671.1 to 1057.5) | 879.5 (670.6 to 1112.4)  | 846 (637.6 to 1096.9)   | -22.4 (-42.9 to 11.9)   | -14.3 (-41.9 to 35.7)  | -28 (-51.2 to 8.2)     |
|                                          |             | YLDs    | 102.9 (68.5 to 138.7)    | 111.8 (70.6 to 154)      | 95.6 (63.9 to 131.3)     | 130.2 (92 to 170.7)     | 152.4 (107.2 to 201.1)   | 113.8 (78.3 to 151.4)   | 26.6 (10 to 49.6)       | 36.3 (9.1 to 74.2)     | 19.1 (-1 to 46.3)      |
| High temperature                         | Deaths      | Deaths  | 8.3 (-4.5 to 22.4)       | 7.6 (-3.9 to 19.9)       | 9.4 (-5.3 to 27.6)       | 6.1 (1.9 to 13.3)       | 5.6 (1.7 to 12.6)        | 6.7 (2.1 to 14.8)       | -26.9 (-77.1 to 2.9)    | -25.7 (-77 to 17)      | -29.2 (-78.2 to 12.7)  |
|                                          |             | YLLs    | 160.6 (-84.4 to 440.4)   | 148.1 (-74.2 to 385.6)   | 175.3 (-95.9 to 500.2)   | 96.5 (29.4 to 212.3)    | 92.4 (27.3 to 210.8)     | 102.1 (32.6 to 226.7)   | -39.9 (-81.8 to -13.4)  | -37.6 (-80.3 to 0.9)   | -41.7 (-82.4 to -9.1)  |
| Household air pollution from solid fuels | Deaths      | Deaths  | 21.2 (11.4 to 33.4)      | 21.6 (12 to 33.8)        | 21 (10.5 to 36)          | 0.1 (0 to 0.3)          | 0.1 (0 to 0.3)           | 0.1 (0 to 0.2)          | -99.5 (-99.9 to -98.6)  | -99.5 (-99.8 to -98.5) | -99.6 (-99.9 to -98.8) |
|                                          |             | DALYs   | 477.6 (258.5 to 748.3)   | 503.9 (285.1 to 773)     | 461.7 (229.2 to 775.7)   | 2 (0.5 to 5.3)          | 2.5 (0.7 to 6.3)         | 1.7 (0.4 to 4.6)        | -99.6 (-99.9 to -98.8)  | -99.5 (-99.9 to -98.6) | -99.6 (-99.9 to -99)   |
|                                          |             | YLLs    | 433.9 (230.6 to 692.4)   | 449.9 (249.9 to 705.7)   | 425.4 (207.4 to 717.1)   | 1.8 (0.4 to 4.5)        | 2.1 (0.6 to 5.4)         | 1.5 (0.4 to 4.1)        | -99.6 (-99.9 to -98.8)  | -99.5 (-99.9 to -98.7) | -99.7 (-99.9 to -99)   |
|                                          |             | YLDs    | 43.7 (23.6 to 68.1)      | 53.9 (30.3 to 81.9)      | 36.2 (17.7 to 59.5)      | 0.3 (0.1 to 0.8)        | 0.4 (0.1 to 1.1)         | 0.2 (0.1 to 0.6)        | -99.3 (-99.8 to -98.3)  | -99.2 (-99.8 to -98)   | -99.4 (-99.8 to -98.4) |
| Kidney dysfunction                       | Deaths      | Deaths  | 11.2 (7.8 to 15.2)       | 10.8 (7.4 to 15.2)       | 11.7 (7.7 to 16.5)       | 11.8 (7.6 to 16.2)      | 11.3 (7.3 to 15.7)       | 12.4 (7.3 to 17.4)      | 5.5 (-23.6 to 46.4)     | 5 (-28.5 to 57.4)      | 6 (-27.6 to 54)        |
|                                          |             | DALYs   | 233.4 (172 to 309.9)     | 230.7 (164.7 to 309.2)   | 238.6 (167.3 to 329.6)   | 224 (163.8 to 287.1)    | 225.5 (164.9 to 292.3)   | 225.9 (158.5 to 296.3)  | -4 (-27.2 to 30.1)      | -2.3 (-28.7 to 38.1)   | -5.3 (-31.6 to 34.8)   |
|                                          |             | YLLs    | 212.1 (151.4 to 283.2)   | 205.9 (143 to 282.6)     | 220.1 (150.7 to 310)     | 195.1 (138.9 to 248.8)  | 191.6 (136.4 to 250.2)   | 200.5 (137.3 to 265.9)  | -8 (-32.1 to 29.6)      | -6.9 (-35.2 to 37.7)   | -8.9 (-36.7 to 33.7)   |
|                                          |             | YLDs    | 21.3 (14.3 to 29)        | 24.8 (16.6 to 33.7)      | 18.5 (12.5 to 25.6)      | 28.9 (19.4 to 39.4)     | 33.8 (23.1 to 46.5)      | 25.4 (17.1 to 34.7)     | 35.8 (22.8 to 49.2)     | 36.5 (22.3 to 51.2)    | 37.3 (21.8 to 54.1)    |
| Lead exposure                            | Deaths      | Deaths  | 5.9 (2.9 to 9.4)         | 4.8 (2.1 to 8.1)         | 7.1 (3.7 to 11.2)        | 3.4 (1.6 to 5.4)        | 2.8 (1.2 to 4.7)         | 4.1 (2 to 6.7)          | -42.1 (-58.8 to -20.6)  | -41.9 (-61.9 to -13.3) | -42.5 (-60 to -17.7)   |
|                                          |             | DALYs   | 129.2 (64.4 to 206.9)    | 106.2 (45.3 to 180.2)    | 151 (77.9 to 240.9)      | 57.7 (25.6 to 94)       | 49 (18 to 85.2)          | 66.3 (31.3 to 108.1)    | -55.4 (-69.1 to -39.8)  | -53.8 (-69.9 to -32.7) | -56.1 (-70 to -37.8)   |
|                                          |             | YLLs    | 118.4 (59.1 to 192.2)    | 95.9 (39.5 to 165.8)     | 139.8 (70.6 to 225.9)    | 51.2 (23.1 to 83.6)     | 42.8 (15.9 to 74.6)      | 59.6 (28 to 97.3)       | -56.8 (-70.7 to -40.2)  | -55.4 (-71.7 to -32.8) | -57.3 (-71.7 to -37.3) |
|                                          |             | YLDs    | 10.8 (5 to 17.7)         | 10.3 (4.1 to 17.9)       | 11.2 (5.5 to 17.9)       | 6.5 (2.5 to 11.8)       | 6.3 (1.9 to 12)          | 6.7 (2.8 to 11.8)       | -39.5 (-54.3 to -29.4)  | -39.2 (-58 to -27.7)   | -40.1 (-54.7 to -29.9) |
| Low physical activity                    | Deaths      | Deaths  | 6.7 (1.4 to 15)          | 4.9 (1.1 to 10.5)        | 9.6 (1.8 to 21.7)        | 7.7 (1.7 to 15.3)       | 6.2 (1.6 to 12.4)        | 9.6 (1.9 to 19.6)       | 15.1 (-14.7 to 71.7)    | 26.9 (-10.9 to 98.1)   | -0.3 (-29.4 to 57.8)   |
|                                          |             | DALYs   | 108 (20.8 to 263.6)      | 77.5 (17 to 180.2)       | 145 (25.1 to 359.3)      | 113.3 (24.8 to 235.8)   | 94.4 (22.2 to 198.2)     | 133.2 (24 to 280.2)     | 4.9 (-21.8 to 54.9)     | 21.9 (-10.7 to 81.6)   | -8.1 (-33 to 46.5)     |
|                                          |             | YLLs    | 95.1 (18.2 to 231.6)     | 64.1 (14 to 147.1)       | 132.4 (23 to 327.5)      | 97.9 (21.4 to 202.1)    | 77.3 (18.8 to 161.1)     | 119.2 (22.1 to 252.1)   | 3 (-25.4 to 58)         | 20.5 (-16.2 to 91.4)   | -10 (-36 to 46)        |

| Location  | Risk factor                          | Measure                 | 1990                      |                           |                           | 2019                      |                           |                           | % Change (1990 to 2019) |                          |                         |
|-----------|--------------------------------------|-------------------------|---------------------------|---------------------------|---------------------------|---------------------------|---------------------------|---------------------------|-------------------------|--------------------------|-------------------------|
|           |                                      |                         | Both                      | Female                    | Male                      | Both                      | Female                    | Male                      | Both                    | Female                   | Male                    |
|           | Low temperature                      | YLDs                    | 12.9 (2.3 to 32.3)        | 13.3 (2.6 to 32.6)        | 12.5 (2.1 to 32)          | 15.4 (2.9 to 36.2)        | 17.1 (3.5 to 39.2)        | 14 (2.3 to 33.8)          | 18.8 (0.2 to 49.9)      | 28.4 (9 to 65.5)         | 11.5 (-7.6 to 46)       |
|           |                                      | Deaths                  | 4.7 (-7 to 15.8)          | 4.2 (-6.5 to 14.2)        | 5.3 (-7.6 to 17.9)        | 3.3 (-4.7 to 10.5)        | 3.1 (-4.5 to 9.9)         | 3.6 (-5.2 to 11.5)        | -28.7 (-172.9 to 518.4) | -27.2 (-178.7 to 539.6)  | -31.1 (-164.8 to 483.5) |
|           |                                      | YLLs                    | 89.9 (-132.9 to 300.7)    | 82.6 (-128.7 to 278.4)    | 98.5 (-141.7 to 330.7)    | 52.6 (-73.8 to 163.7)     | 50.5 (-72.9 to 157.7)     | 55.7 (-80.1 to 173.7)     | -41.4 (-160.3 to 426.2) | -38.9 (-166.3 to 446.5)  | -43.4 (-157.3 to 381.3) |
|           | Secondhand smoke                     | Deaths                  | 3.8 (2.5 to 5.4)          | 3.8 (2.4 to 5.4)          | 4 (2.6 to 5.9)            | 2.4 (1.7 to 3.3)          | 2.3 (1.6 to 3.1)          | 2.6 (1.8 to 3.7)          | -36.4 (-53 to -10.9)    | -38.3 (-57.3 to -8.9)    | -35.5 (-56.4 to -2.9)   |
|           |                                      | DALYs                   | 86.9 (56.8 to 125.3)      | 92.1 (58.6 to 132.4)      | 86.4 (56 to 127.8)        | 48.3 (34.6 to 64.6)       | 51.6 (36.6 to 69.1)       | 48 (33.1 to 67.3)         | -44.4 (-58.6 to -23.2)  | -44 (-60.2 to -19.8)     | -44.5 (-62 to -18.3)    |
|           | Smoking                              | YLLs                    | 82.1 (53.2 to 119.8)      | 85.9 (54.2 to 125)        | 82.5 (52.9 to 122.9)      | 44 (31.1 to 59.1)         | 46 (32.2 to 61.8)         | 44.4 (30.2 to 62.7)       | -46.4 (-61.1 to -24)    | -46.5 (-62.6 to -20.7)   | -46.1 (-63.6 to -19.2)  |
|           |                                      | YLDs                    | 4.8 (3.1 to 6.7)          | 6.2 (3.9 to 8.6)          | 4 (2.6 to 5.7)            | 4.3 (2.7 to 6)            | 5.6 (3.6 to 7.8)          | 3.6 (2.3 to 5.2)          | -11 (-20.4 to -0.2)     | -9.5 (-20.6 to 3)        | -10 (-25.6 to 9.1)      |
|           |                                      | Deaths                  | 13.3 (9.6 to 17.8)        | 3.8 (2.3 to 5.9)          | 22.4 (15.8 to 29.7)       | 5.4 (4.4 to 6.6)          | 1.7 (1.2 to 2.5)          | 8.7 (6.8 to 11)           | -59.5 (-71.5 to -41.6)  | -54.9 (-73.8 to -24.3)   | -61.4 (-73.4 to -42.8)  |
|           |                                      | DALYs                   | 355.5 (258.6 to 471.4)    | 95.5 (59.7 to 143)        | 568.4 (405.4 to 754.2)    | 129.7 (106.9 to 160.6)    | 41.6 (29.7 to 59.5)       | 198.2 (160 to 247.5)      | -63.5 (-73.8 to -47.9)  | -56.5 (-73.7 to -27.3)   | -65.1 (-75.4 to -49.5)  |
|           |                                      | YLLs                    | 325.1 (231.4 to 440.5)    | 85.8 (52.3 to 129.9)      | 522.2 (360.4 to 703.8)    | 110.9 (88.9 to 140)       | 34.9 (24.5 to 50.2)       | 171 (133.8 to 218.7)      | -65.9 (-76.2 to -49.7)  | -59.3 (-76.3 to -29.6)   | -67.3 (-77.6 to -50.9)  |
|           | YLDs                                 | 30.5 (21.6 to 40.1)     | 9.8 (6.1 to 14.3)         | 46.2 (32.8 to 60.7)       | 18.9 (13.3 to 24.9)       | 6.7 (4.3 to 9.8)          | 27.2 (19 to 35.5)         | -38 (-46.3 to -28.4)      | -31.8 (-54.9 to 3.5)    | -41.2 (-49.4 to -32.6)   |                         |
| Palestine | All risk factors                     | Deaths                  | 141.7 (114.1 to 173)      | 136.6 (107.6 to 169.7)    | 148.8 (118.1 to 180.5)    | 101.7 (86.2 to 119.4)     | 98.7 (83.3 to 117)        | 107.8 (88.3 to 126.6)     | -28.3 (-43.1 to -8.1)   | -27.7 (-43.8 to -7.6)    | -27.6 (-43.3 to -7.1)   |
|           |                                      | DALYs                   | 2660 (2165 to 3234.6)     | 2579.6 (2090 to 3165.8)   | 2765.3 (2182.1 to 3370.1) | 1825.8 (1582.8 to 2103.3) | 1796.4 (1551.6 to 2071.5) | 1868.2 (1566.8 to 2178.6) | -31.4 (-45.6 to -13.5)  | -30.4 (-44.9 to -12.4)   | -32.4 (-47.4 to -12.4)  |
|           |                                      | YLLs                    | 2450.8 (1968.7 to 3025.9) | 2334.4 (1850.1 to 2916.2) | 2598.9 (2024.9 to 3207.3) | 1623 (1387.1 to 1881.2)   | 1555.9 (1317.6 to 1820.3) | 1707.5 (1414.3 to 2004.8) | -33.8 (-48.8 to -14.2)  | -33.4 (-48.7 to -13.6)   | -34.3 (-49.6 to -13.2)  |
|           | Alcohol use                          | YLDs                    | 209.2 (153.4 to 266.7)    | 245.1 (177.4 to 311.8)    | 166.4 (121.1 to 214.1)    | 202.8 (146.8 to 256.3)    | 240.5 (172.6 to 306.1)    | 160.7 (115.9 to 204.9)    | -3.1 (-9.3 to 3.8)      | -1.9 (-9.9 to 7.1)       | -3.4 (-12.3 to 5.5)     |
|           |                                      | Deaths                  | 1 (0.4 to 1.7)            | 0.3 (0 to 0.7)            | 2 (0.8 to 3.2)            | 0.9 (0.5 to 1.3)          | 0.3 (0 to 0.6)            | 1.7 (1 to 2.5)            | -12.9 (-51.1 to 112.3)  | 7.1 (-450.9 to 701.8)    | -16.2 (-49.9 to 81.4)   |
|           |                                      | DALYs                   | 26.3 (11.8 to 41.1)       | 6.8 (0 to 14.9)           | 49.9 (23.4 to 78.6)       | 22.8 (14.3 to 32.3)       | 6.8 (1.7 to 12.5)         | 39.9 (24.9 to 57.6)       | -13.5 (-48.6 to 88.6)   | -1.1 (-90.2 to 350.7)    | -20 (-50.1 to 64.2)     |
|           | Ambient particulate matter pollution | YLLs                    | 25 (11.2 to 39)           | 6.5 (0.2 to 14.1)         | 47.5 (22 to 74.7)         | 20.8 (13.1 to 29.8)       | 6.1 (1.6 to 11.2)         | 36.6 (23 to 53.3)         | -16.9 (-51.1 to 82.4)   | -6.4 (-86.7 to 374.5)    | -22.9 (-52.6 to 60.4)   |
|           |                                      | YLDs                    | 1.3 (0.4 to 2.2)          | 0.3 (-0.2 to 1)           | 2.5 (1 to 4.1)            | 2 (1.1 to 3.1)            | 0.7 (0 to 1.5)            | 3.3 (1.8 to 5.2)          | 50.9 (-5.2 to 288.9)    | 98.3 (-1453.2 to 1469.8) | 34.3 (-7.3 to 152.3)    |
|           |                                      | Deaths                  | 18.1 (8.8 to 29.8)        | 15.8 (7.1 to 26.7)        | 20.9 (10.3 to 33.8)       | 23.6 (17.2 to 30.1)       | 23.1 (16.8 to 29.8)       | 24.5 (17.4 to 31.3)       | 30.7 (-16.6 to 145.4)   | 46.2 (-7.8 to 184.8)     | 16.8 (-23.5 to 110)     |
|           | Diet high in red meat                | DALYs                   | 374.2 (179.1 to 615.7)    | 330.2 (146 to 557.1)      | 428.2 (213.2 to 692.4)    | 477.9 (349 to 603.3)      | 473.4 (346.1 to 598.3)    | 482.4 (347.3 to 610.4)    | 27.7 (-18.1 to 142.3)   | 43.4 (-8.9 to 180.7)     | 12.6 (-26.6 to 108.7)   |
|           |                                      | YLLs                    | 342.9 (164.5 to 570.1)    | 296 (131.1 to 503.6)      | 400.3 (198.4 to 650.8)    | 419.2 (305.6 to 532.1)    | 403.1 (293 to 512.8)      | 436.3 (311.5 to 558.5)    | 22.3 (-22.8 to 131.4)   | 36.1 (-15.8 to 167.8)    | 9 (-29.9 to 103.4)      |
|           |                                      | YLDs                    | 31.3 (15 to 52.8)         | 34.2 (15.6 to 59.5)       | 27.9 (13.6 to 46.6)       | 58.7 (38.1 to 79.7)       | 70.4 (45.9 to 96.5)       | 46 (29.9 to 63.1)         | 87.3 (28 to 256.9)      | 105.8 (35.8 to 296.7)    | 64.8 (15.2 to 196.3)    |
|           | Diet high in sodium                  | Deaths                  | 3.4 (1.2 to 5.8)          | 3.3 (1.1 to 5.6)          | 3.6 (1.3 to 6.2)          | 2 (0.7 to 3.4)            | 2 (0.6 to 3.3)            | 2.2 (0.7 to 3.7)          | -40.5 (-58.4 to -19.9)  | -40.2 (-59 to -17.1)     | -40.1 (-59.2 to -15.3)  |
|           |                                      | DALYs                   | 77.9 (25.9 to 131.7)      | 75.6 (25.2 to 126.9)      | 81 (27.5 to 137.1)        | 44.2 (14.1 to 74.3)       | 43.3 (13.7 to 73.1)       | 45.4 (14.5 to 76.3)       | -43.2 (-60.5 to -24)    | -42.8 (-60.1 to -23.1)   | -43.9 (-61.5 to -21.2)  |
|           |                                      | YLLs                    | 70.5 (23.1 to 119.4)      | 66.9 (21.7 to 114.4)      | 75.1 (24.6 to 128.5)      | 38.2 (12.4 to 64.1)       | 36 (11.9 to 61.1)         | 40.6 (13 to 68.7)         | -45.8 (-62.9 to -25.2)  | -46.1 (-63.1 to -25)     | -45.9 (-63.6 to -21.8)  |
|           | Diet low in fiber                    | YLDs                    | 7.4 (2 to 12.9)           | 8.8 (2.4 to 15.3)         | 5.8 (1.6 to 10.2)         | 6 (1.6 to 10.7)           | 7.3 (2 to 13.1)           | 4.8 (1.2 to 8.5)          | -18.4 (-29 to -9.7)     | -17.1 (-30.2 to -5.7)    | -18.1 (-31.4 to -6)     |
|           |                                      | Deaths                  | 2.7 (0.4 to 10.6)         | 1.9 (0.4 to 7.5)          | 3.6 (0.4 to 15)           | 1.8 (0.3 to 6.9)          | 1.3 (0.3 to 5)            | 2.4 (0.3 to 9.8)          | -33.9 (-60.5 to 24.7)   | -33.4 (-69.2 to 54.6)    | -32.9 (-62.3 to 48.8)   |
|           |                                      | DALYs                   | 56.7 (7.7 to 228.6)       | 39.8 (7.7 to 162.2)       | 77.1 (6.3 to 310.8)       | 37.1 (5.5 to 149.7)       | 25.9 (5.5 to 108.8)       | 49.7 (4.6 to 194.4)       | -34.6 (-62 to 19.6)     | -34.9 (-70.8 to 52.3)    | -35.5 (-62.6 to 35.3)   |
|           | Diet low in fruits                   | YLLs                    | 52.3 (7 to 211)           | 35.9 (7 to 144.5)         | 72.2 (5.9 to 292.2)       | 32.9 (4.9 to 132.6)       | 22.2 (4.7 to 93.9)        | 45.1 (4.2 to 177.1)       | -37.1 (-63.5 to 16.4)   | -38 (-72.8 to 48.3)      | -37.6 (-64.6 to 33.4)   |
|           |                                      | YLDs                    | 4.3 (0.6 to 17.5)         | 3.9 (0.7 to 15.9)         | 4.9 (0.4 to 20)           | 4.1 (0.6 to 16.3)         | 3.6 (0.7 to 15.8)         | 4.7 (0.4 to 17.7)         | -4.8 (-48.8 to 77.2)    | -6.4 (-57.5 to 113.5)    | -5 (-39 to 85.1)        |
|           |                                      | Deaths                  | 8.4 (2.3 to 14.7)         | 8.1 (2.2 to 14.2)         | 8.8 (2.5 to 15.4)         | 5.9 (1.7 to 9.8)          | 5.7 (1.5 to 9.7)          | 6.2 (1.8 to 10.5)         | -29.4 (-45.4 to -7.6)   | -28.8 (-47.8 to -0.7)    | -29.2 (-47.7 to -2)     |
|           | Diet low in vegetables               | DALYs                   | 173.2 (47.2 to 303.8)     | 169.1 (44.6 to 297.2)     | 178.9 (48.4 to 317.1)     | 118.1 (32.6 to 199.2)     | 116.6 (30.5 to 199.8)     | 120.1 (35.6 to 202.1)     | -31.8 (-47.5 to -9.6)   | -31 (-48.3 to -4.4)      | -32.9 (-50.4 to -6.9)   |
|           |                                      | YLLs                    | 157.1 (41.9 to 279.7)     | 149.9 (39.9 to 270.4)     | 166.3 (44.4 to 296.7)     | 102.4 (28 to 173.6)       | 97.7 (24.8 to 167.5)      | 107.8 (31.6 to 183.5)     | -34.8 (-51 to -11.7)    | -34.8 (-53 to -7.5)      | -35.2 (-53.3 to -8.4)   |
|           |                                      | YLDs                    | 16.1 (4.3 to 28)          | 19.2 (5 to 33.7)          | 12.6 (3.4 to 22)          | 15.7 (4.4 to 27.3)        | 18.9 (5.1 to 33.2)        | 12.3 (3.5 to 21.4)        | -2.9 (-15.5 to 14.4)    | -1.4 (-18 to 21.8)       | -3 (-20.2 to 19.9)      |
|           | Diet low in whole grains             | Deaths                  | 8.5 (3.8 to 14.4)         | 8.3 (3.7 to 14)           | 8.9 (4 to 15.1)           | 4.9 (2 to 8.3)            | 4.8 (1.9 to 8.3)          | 5.1 (2 to 8.8)            | -42.8 (-61.3 to -22.3)  | -42.1 (-61.5 to -19.6)   | -43 (-62.4 to -21.5)    |
|           |                                      | DALYs                   | 183.6 (83.5 to 307.5)     | 180.3 (82.3 to 301.9)     | 188.3 (84.9 to 318.7)     | 101.8 (43.5 to 170.4)     | 101.6 (43.6 to 170.3)     | 102.3 (42.5 to 177.2)     | -44.5 (-62 to -25.1)    | -43.6 (-61.1 to -23)     | -45.7 (-63.6 to -23.5)  |
|           |                                      | YLLs                    | 167.9 (77.3 to 284.3)     | 161.6 (74.6 to 274)       | 176.2 (81 to 299.7)       | 88.7 (38.6 to 149.7)      | 85.6 (37.5 to 144.1)      | 92.2 (38.2 to 161.2)      | -47.2 (-64.1 to -26.7)  | -47 (-64.4 to -25)       | -47.7 (-65.4 to -24.9)  |
|           | High body-mass index                 | YLDs                    | 15.7 (5.8 to 28.7)        | 18.8 (7.1 to 34.3)        | 12.1 (4.6 to 22.2)        | 13.1 (4.7 to 24.7)        | 16 (5.7 to 30.3)          | 10.1 (3.5 to 19.4)        | -16.5 (-32.2 to -6.3)   | -14.6 (-32.2 to -1.3)    | -17.1 (-36.7 to -3.1)   |
|           |                                      | Deaths                  | 8.2 (3.8 to 12.8)         | 7.8 (3.5 to 12.3)         | 8.7 (4 to 13.8)           | 2.3 (0.8 to 4)            | 2.2 (0.8 to 3.8)          | 2.6 (0.9 to 4.5)          | -71.7 (-86.1 to -51.7)  | -72.1 (-86.9 to -50.9)   | -70.2 (-85.1 to -50.1)  |
|           |                                      | DALYs                   | 175.6 (80 to 273.1)       | 169 (75.7 to 267.3)       | 184.2 (84.8 to 292.5)     | 38.3 (11.1 to 69.8)       | 36.3 (10.7 to 67.1)       | 41 (11.9 to 75.7)         | -78.2 (-91.2 to -58.8)  | -78.5 (-92 to -58.9)     | -77.7 (-90.8 to -59.4)  |
|           | YLLs                                 | 161.7 (72.6 to 252.3)   | 152.7 (67.3 to 242.1)     | 173.2 (78.4 to 275.8)     | 33.9 (10.1 to 62)         | 31.2 (9.6 to 57.6)        | 37.4 (11.3 to 69.1)       | -79 (-91.5 to -59.2)      | -79.5 (-92.2 to -60.4)  | -78.4 (-91 to -59.2)     |                         |
|           | YLDs                                 | 13.9 (5.1 to 23.7)      | 16.3 (5.9 to 27.5)        | 11 (4.1 to 19)            | 4.4 (0.9 to 8.8)          | 5.1 (1 to 10.5)           | 3.6 (0.7 to 7)            | -68.5 (-89.9 to -41.3)    | -68.9 (-90.5 to -40.2)  | -67.5 (-89.3 to -40)     |                         |
|           | Deaths                               | 9.4 (5.5 to 13)         | 9.5 (5.5 to 13)           | 9.5 (5.3 to 13.3)         | 7.4 (4.3 to 10.1)         | 7.5 (4.4 to 10)           | 7.6 (4.1 to 10.3)         | -21.2 (-38.1 to 0.9)      | -21.3 (-39.1 to 1.3)    | -20.3 (-38.8 to 5)       |                         |
|           | DALYs                                | 174.3 (96.8 to 244.7)   | 177.6 (99.7 to 247.3)     | 171.1 (89.2 to 244.7)     | 134 (73.2 to 181.9)       | 137.2 (77.7 to 184.5)     | 130.6 (67.3 to 180.5)     | -23.1 (-39.4 to -3.2)     | -22.8 (-39.4 to -3.5)   | -23.6 (-41.1 to -1.6)    |                         |
|           | YLLs                                 | 153.6 (85.9 to 218)     | 152.6 (85.1 to 215.4)     | 155.4 (81.1 to 224.9)     | 114.9 (63.7 to 157.1)     | 113.9 (64.7 to 154.1)     | 116.1 (59.4 to 161.1)     | -25.2 (-43 to -2.6)       | -25.4 (-43.7 to -2.5)   | -25.3 (-44.2 to -0.5)    |                         |
|           | YLDs                                 | 20.7 (10.7 to 30.1)     | 25 (13 to 36)             | 15.7 (8 to 23.1)          | 19.1 (9.6 to 27.8)        | 23.3 (12 to 34.2)         | 14.5 (7.1 to 21.1)        | -7.7 (-15.1 to -0.7)      | -6.6 (-15.3 to 2.3)     | -7.5 (-18 to 2.7)        |                         |
|           | Deaths                               | 24.4 (12.6 to 40.2)     | 27.8 (15.2 to 44)         | 20.6 (9.1 to 36.6)        | 19.8 (11.9 to 29.8)       | 21.4 (13.3 to 31.1)       | 17.7 (9.8 to 27.9)        | -18.9 (-40 to 14.7)       | -22.7 (-43.3 to 10.1)   | -13.9 (-38.3 to 33.2)    |                         |
|           | DALYs                                | 689.1 (388.5 to 1081.1) | 785.4 (469.5 to 1194.2)   | 576.6 (281.5 to 975)      | 542.5 (354.3 to 758.9)    | 586.6 (397 to 804.1)      | 490.9 (301.3 to 719.9)    | -21.3 (-40.5 to 7)        | -25.3 (-43.7 to 0.3)    | -14.9 (-38.9 to 27.9)    |                         |

| Location         | Risk factor                              | Measure                 | 1990                      |                           |                           | 2019                     |                         |                           | % Change (1990 to 2019)   |                         |                        |
|------------------|------------------------------------------|-------------------------|---------------------------|---------------------------|---------------------------|--------------------------|-------------------------|---------------------------|---------------------------|-------------------------|------------------------|
|                  |                                          |                         | Both                      | Female                    | Male                      | Both                     | Female                  | Male                      | Both                      | Female                  | Male                   |
|                  | High fasting plasma glucose              | YLLs                    | 621.2 (341.4 to 980.1)    | 695.1 (402.8 to 1074.1)   | 535.1 (258.8 to 917)      | 464 (299.4 to 657.4)     | 484.7 (321 to 678.1)    | 436.3 (263.4 to 645.7)    | -25.3 (-45.1 to 4.3)      | -30.3 (-49.3 to -2.5)   | -18.5 (-42.8 to 24.8)  |
|                  |                                          | YLDs                    | 67.9 (38.5 to 104.9)      | 90.3 (53.9 to 133)        | 41.5 (20.3 to 69.6)       | 78.5 (50 to 113.4)       | 101.9 (64.6 to 144.7)   | 54.7 (32.8 to 82.3)       | 15.6 (3.5 to 36.4)        | 12.8 (1.1 to 32.2)      | 31.8 (9 to 80)         |
|                  |                                          | Deaths                  | 42.3 (22.5 to 76.3)       | 38.1 (20.3 to 72.4)       | 47.6 (25.5 to 84.3)       | 41 (22.2 to 78.8)        | 40 (21 to 78.2)         | 43.4 (23.4 to 82.5)       | -3.1 (-30.8 to 37.4)      | 4.8 (-29.1 to 62.7)     | -8.9 (-37.1 to 33.6)   |
|                  |                                          | DALYs                   | 762.2 (429.5 to 1238)     | 683.7 (383.9 to 1159.3)   | 857.7 (479.4 to 1378.5)   | 733.5 (439.8 to 1237.8)  | 717.4 (411.7 to 1230.3) | 753.3 (438.6 to 1263.8)   | -3.8 (-30.7 to 35.6)      | 4.9 (-28.6 to 57.9)     | -12.2 (-37.3 to 30.4)  |
|                  | High LDL cholesterol                     | YLLs                    | 709.3 (392 to 1143.8)     | 625.8 (347.2 to 1081.5)   | 810.6 (450.6 to 1296.3)   | 658.1 (388.5 to 1123.9)  | 629.9 (363.5 to 1110.5) | 692.1 (405.8 to 1160.6)   | -7.2 (-34 to 31.7)        | 0.6 (-33.9 to 54.4)     | -14.6 (-40.3 to 28.2)  |
|                  |                                          | YLDs                    | 52.9 (27.9 to 93.1)       | 57.9 (30.2 to 106.8)      | 47.1 (23.3 to 84.1)       | 75.4 (39.7 to 127.1)     | 87.5 (46.4 to 148.6)    | 61.3 (32.5 to 104.6)      | 42.6 (16.7 to 85.1)       | 51.3 (16.6 to 112.2)    | 30.2 (3.5 to 78.6)     |
|                  |                                          | Deaths                  | 21.8 (7.6 to 48.3)        | 21.9 (7.7 to 48.4)        | 21.9 (7.6 to 47.4)        | 18.7 (6 to 39.9)         | 18.6 (5.8 to 40.7)      | 19.2 (6.1 to 40.8)        | -14.2 (-34.4 to 9.4)      | -15 (-36.1 to 9.6)      | -12.5 (-34.4 to 13.8)  |
|                  |                                          | DALYs                   | 422.4 (213.5 to 770.2)    | 432.2 (221.7 to 792.8)    | 412.7 (203 to 756.7)      | 350.1 (174.7 to 627.8)   | 356 (177.7 to 642.8)    | 344.2 (171.5 to 609.5)    | -17.1 (-34.8 to 4.3)      | -17.6 (-36.2 to 3.7)    | -16.6 (-36.9 to 8.3)   |
|                  | High systolic blood pressure             | YLLs                    | 366.1 (172.4 to 692.5)    | 363.9 (174.2 to 689.8)    | 370.7 (172.2 to 691.9)    | 295.1 (138.7 to 554.1)   | 288.7 (132.8 to 550.1)  | 302.5 (142.9 to 556.7)    | -19.4 (-39.5 to 5.6)      | -20.7 (-42.3 to 4.4)    | -18.4 (-40.4 to 9.6)   |
|                  |                                          | YLDs                    | 56.3 (33.6 to 91.7)       | 68.3 (40.4 to 111.1)      | 42 (24.7 to 68.9)         | 55 (32.5 to 90.6)        | 67.3 (39.4 to 112)      | 41.7 (24.9 to 68.3)       | -2.4 (-10.4 to 5)         | -1.4 (-11.2 to 8.5)     | -0.8 (-12.5 to 10.7)   |
|                  |                                          | Deaths                  | 74.6 (54.4 to 99.3)       | 75.5 (52.9 to 102.5)      | 73.5 (52.7 to 98.5)       | 51.9 (38.9 to 67.1)      | 50 (35.9 to 66.7)       | 55.5 (40.1 to 72)         | -30.4 (-48.5 to -8.6)     | -33.8 (-53.2 to -5.5)   | -24.6 (-44.6 to 1.7)   |
|                  |                                          | DALYs                   | 1468.7 (1100.4 to 1868.6) | 1472.1 (1084.4 to 1917.9) | 1466.9 (1065.8 to 1926.5) | 979.3 (759.6 to 1210.4)  | 949.8 (706.6 to 1209.1) | 1015.4 (770.5 to 1268.1)  | -33.3 (-48.8 to -13.4)    | -35.5 (-52.6 to -11.9)  | -30.8 (-48.1 to -7.1)  |
|                  | High temperature                         | YLLs                    | 1353.5 (987.7 to 1751)    | 1335.7 (962.2 to 1767.9)  | 1377.5 (984.1 to 1828.6)  | 870.6 (668.4 to 1095.3)  | 823 (610.7 to 1064.6)   | 926.8 (699.9 to 1164.7)   | -35.7 (-52 to -15)        | -38.4 (-56.1 to -13.3)  | -32.7 (-50.5 to -7.9)  |
|                  |                                          | YLDs                    | 115.2 (79.3 to 152.5)     | 136.4 (91.3 to 183.1)     | 89.5 (61.8 to 119.2)      | 108.8 (74.9 to 144.8)    | 126.8 (84.5 to 172.5)   | 88.6 (60.5 to 120.5)      | -5.6 (-18.1 to 9.2)       | -7 (-24.7 to 15.6)      | -1 (-16 to 17.3)       |
|                  |                                          | Deaths                  | 0.5 (-0.5 to 5.4)         | 0.5 (-0.5 to 5.4)         | 0.5 (-0.5 to 5.5)         | 0.6 (-0.3 to 2.9)        | 0.5 (-0.3 to 2.8)       | 0.6 (-0.4 to 3.1)         | 17.7 (-700.7 to 681.5)    | 19.6 (-671.8 to 665.3)  | 17.7 (-732.3 to 680.8) |
|                  |                                          | YLLs                    | 8 (-8.9 to 90)            | 7.7 (-8.8 to 88.5)        | 8.4 (-9 to 92)            | 8.7 (-5.3 to 44.9)       | 8.4 (-5.2 to 43.2)      | 9 (-5.4 to 47)            | 8.1 (-649.3 to 627.1)     | 9.7 (-623.7 to 617.3)   | 6.4 (-685.5 to 605.9)  |
|                  | Household air pollution from solid fuels | Deaths                  | 20.8 (10.5 to 33.1)       | 22.1 (11.6 to 34.6)       | 19.3 (8.9 to 31.8)        | 0.4 (0.2 to 0.8)         | 0.4 (0.2 to 0.9)        | 0.3 (0.1 to 0.7)          | -98.1 (-99.2 to -96)      | -98 (-99.1 to -95.7)    | -98.4 (-99.3 to -96.2) |
|                  |                                          | DALYs                   | 429.4 (217.5 to 674.6)    | 459.3 (244.8 to 714.7)    | 394.4 (186.9 to 649.8)    | 7.8 (3.5 to 15.6)        | 9.2 (4.3 to 18)         | 6.1 (2.5 to 13.3)         | -98.2 (-99.2 to -96.1)    | -98 (-99.1 to -95.8)    | -98.4 (-99.4 to -96.3) |
|                  |                                          | YLLs                    | 391.9 (196.6 to 625.5)    | 411.8 (216.1 to 644.2)    | 368.8 (170.8 to 616.1)    | 6.8 (3 to 13.7)          | 7.8 (3.6 to 15.3)       | 5.5 (2.2 to 12.1)         | -98.3 (-99.2 to -96.2)    | -98.1 (-99.2 to -95.9)  | -98.5 (-99.4 to -96.4) |
|                  |                                          | YLDs                    | 37.5 (19.3 to 59.7)       | 47.5 (24.8 to 74)         | 25.7 (12 to 43.3)         | 1 (0.4 to 2)             | 1.4 (0.6 to 2.7)        | 0.6 (0.2 to 1.3)          | -97.4 (-98.8 to -94.3)    | -97.1 (-98.7 to -93.8)  | -97.7 (-99 to -95)     |
|                  | Kidney dysfunction                       | Deaths                  | 15.1 (10.1 to 20.5)       | 15.7 (10.2 to 21.5)       | 14.4 (9.7 to 19.5)        | 14 (8.7 to 19.6)         | 14.2 (8.7 to 20)        | 14 (8.4 to 19.5)          | -7.2 (-28.9 to 19.4)      | -9.6 (-32.6 to 17.9)    | -3.1 (-29.2 to 29.8)   |
|                  |                                          | DALYs                   | 296.4 (217.1 to 384.4)    | 313.3 (226 to 411.1)      | 277 (200 to 364.2)        | 269.8 (196 to 347)       | 278.6 (201.8 to 360.1)  | 260.1 (184.9 to 334.9)    | -9 (-29.2 to 14.8)        | -11.1 (-31.6 to 14.2)   | -6.1 (-28.9 to 23.5)   |
|                  |                                          | YLLs                    | 272 (195.7 to 356.7)      | 282.7 (201 to 377.2)      | 260 (185.6 to 346.2)      | 239.5 (171.6 to 310.4)   | 241.4 (169.4 to 313.2)  | 237.5 (166.5 to 309.5)    | -11.9 (-32.8 to 13.6)     | -14.6 (-36.2 to 13.6)   | -8.7 (-31.9 to 22.2)   |
|                  |                                          | YLDs                    | 24.4 (16.7 to 33.1)       | 30.6 (21.1 to 41.5)       | 17 (11.5 to 23.2)         | 30.2 (20.3 to 40.9)      | 37.1 (24.8 to 50.4)     | 22.7 (15.4 to 31)         | 23.9 (13.8 to 35.8)       | 21.3 (9 to 34.7)        | 33.1 (17 to 49.5)      |
|                  | Lead exposure                            | Deaths                  | 8.5 (4.9 to 12.9)         | 6.9 (3.6 to 10.9)         | 10.5 (6.2 to 15.7)        | 5.1 (2.9 to 7.9)         | 4.2 (2.1 to 6.8)        | 6.5 (3.8 to 9.8)          | -39.9 (-54.7 to -22.8)    | -38.8 (-55.2 to -19.3)  | -38 (-53.7 to -17)     |
|                  |                                          | DALYs                   | 159.7 (87.7 to 241.5)     | 128.6 (65.6 to 206.2)     | 198.1 (114 to 293.5)      | 83.3 (43.5 to 130.2)     | 68.2 (31.2 to 111.6)    | 102.8 (58.3 to 154.5)     | -47.8 (-60.9 to -32.8)    | -47 (-62.3 to -30.7)    | -48.1 (-62 to -31)     |
|                  |                                          | YLLs                    | 148.5 (81.7 to 226.1)     | 117.4 (59.7 to 190.1)     | 186.9 (107.5 to 279.2)    | 75.6 (40.4 to 117.7)     | 60.6 (27.8 to 99.2)     | 95.1 (53.8 to 143.9)      | -49.1 (-62.6 to -33.3)    | -48.4 (-64.1 to -30.8)  | -49.1 (-63.2 to -31.2) |
|                  |                                          | YLDs                    | 11.2 (5.6 to 18)          | 11.2 (4.9 to 18.8)        | 11.2 (6.2 to 17.4)        | 7.7 (3.4 to 13.2)        | 7.6 (2.8 to 13.9)       | 7.7 (3.8 to 12.5)         | -31.5 (-44.6 to -22.6)    | -31.9 (-50.1 to -19.8)  | -31.7 (-44.8 to -21.7) |
|                  | Low physical activity                    | Deaths                  | 9.7 (2.1 to 21.1)         | 10 (2.4 to 20.9)          | 9.4 (1.8 to 21)           | 8.7 (2 to 18.2)          | 9 (2.2 to 18.3)         | 8.5 (1.5 to 18.7)         | -10.3 (-29.2 to 16.4)     | -10.3 (-31 to 20.6)     | -9.2 (-30 to 22.6)     |
|                  |                                          | DALYs                   | 140.2 (28.7 to 319.6)     | 148.3 (32.9 to 324.6)     | 131.1 (22.4 to 320.6)     | 122.9 (26.5 to 276.5)    | 131.5 (30.2 to 282)     | 113.6 (21 to 264.5)       | -12.3 (-30.1 to 12.7)     | -11.3 (-31.3 to 17.2)   | -13.4 (-33.4 to 15.4)  |
| YLLs             |                                          | 127.3 (25.8 to 289.5)   | 132.1 (29.5 to 290.5)     | 122 (21.2 to 296.1)       | 109.2 (23.7 to 244.5)     | 114 (26.6 to 242.4)      | 104.2 (19.4 to 240.5)   | -14.2 (-33.3 to 12.8)     | -13.7 (-34.8 to 16.3)     | -14.6 (-35.5 to 15.7)   |                        |
| YLDs             |                                          | 13 (2.4 to 32.5)        | 16.2 (3.3 to 39.4)        | 9.1 (1.4 to 24.1)         | 13.8 (2.6 to 33.4)        | 17.4 (3.6 to 41.4)       | 9.4 (1.5 to 24.4)       | 6.1 (-5.6 to 26.8)        | 7.9 (-6.1 to 31.5)        | 3.3 (-12.4 to 25.9)     |                        |
| Low temperature  | Deaths                                   | 9.9 (0.8 to 20.8)       | 9.6 (0.8 to 20.5)         | 10.4 (0.8 to 21.5)        | 6.6 (0.6 to 13.3)         | 6.4 (0.6 to 13)          | 6.9 (0.6 to 13.9)       | -33.9 (-49.8 to -9.1)     | -33 (-49.9 to -6)         | -33.7 (-50.1 to -10.2)  |                        |
|                  | YLLs                                     | 167 (12.8 to 353.3)     | 160.9 (12.2 to 343.7)     | 175 (13.6 to 368)         | 101.3 (8.8 to 206.4)      | 98.6 (8.6 to 200.4)      | 104.9 (9.8 to 214.2)    | -39.4 (-54.7 to -16.3)    | -38.7 (-54.8 to -13.6)    | -40 (-55.4 to -16.6)    |                        |
|                  | Deaths                                   | 6.6 (4.6 to 9.1)        | 7.5 (5.2 to 10.4)         | 5.5 (3.8 to 7.8)          | 4 (2.9 to 5.4)            | 4.7 (3.4 to 6.3)         | 3.2 (2.3 to 4.4)        | -38.6 (-52.7 to -19.7)    | -36.9 (-53 to -17.7)      | -41.3 (-56.4 to -21)    |                        |
|                  | DALYs                                    | 146 (102.3 to 203)      | 172.2 (120.6 to 238.9)    | 114.9 (77.3 to 162.6)     | 87 (62.6 to 114.2)        | 105.7 (77 to 136.5)      | 66.6 (46 to 89.8)       | -40.4 (-54.4 to -22.2)    | -38.6 (-53.6 to -19.7)    | -42 (-56.7 to -21.2)    |                        |
| Secondhand smoke | YLLs                                     | 137.4 (95 to 192.2)     | 160 (111 to 223.2)        | 110.5 (74.1 to 157.3)     | 79.3 (56.7 to 104.6)      | 94.3 (68.4 to 123.5)     | 62.7 (43 to 85.3)       | -42.3 (-56.5 to -22.8)    | -41 (-56.7 to -20.9)      | -43.2 (-58.4 to -22.1)  |                        |
|                  | YLDs                                     | 8.6 (5.6 to 12)         | 12.3 (8 to 17)            | 4.4 (2.8 to 6.3)          | 7.7 (4.9 to 10.6)         | 11.4 (7.2 to 15.7)       | 3.9 (2.5 to 5.6)        | -11 (-18.1 to -3.4)       | -6.9 (-15.5 to 2.4)       | -11.4 (-24.5 to 2.2)    |                        |
|                  | Deaths                                   | 21 (16.2 to 26.9)       | 6.2 (4.1 to 9)            | 39 (30.1 to 49.6)         | 12.5 (10.2 to 14.9)       | 3.4 (2.4 to 4.7)         | 23.7 (19.4 to 27.9)     | -40.5 (-55.1 to -18.6)    | -44.3 (-65.4 to -9.8)     | -39.4 (-54.4 to -18.1)  |                        |
|                  | DALYs                                    | 480.3 (373.3 to 614.3)  | 141.3 (91.6 to 202.6)     | 890.1 (691.1 to 1132.7)   | 292.3 (244.3 to 347.4)    | 77.7 (55.4 to 105.4)     | 528.2 (441.5 to 621.2)  | -39.2 (-54.6 to -18)      | -45 (-65.9 to -11.9)      | -40.7 (-55.3 to -19.8)  |                        |
| Smoking          | YLLs                                     | 445.1 (339.4 to 575.7)  | 126.6 (81.4 to 184.7)     | 830.3 (635.9 to 1075)     | 260.7 (214.4 to 312.3)    | 66 (46.7 to 91)          | 475.9 (388.9 to 564.9)  | -41.4 (-57 to -18.6)      | -47.9 (-68.2 to -15.3)    | -42.7 (-57.7 to -21)    |                        |
|                  | YLDs                                     | 35.2 (24.9 to 46.6)     | 14.8 (9.2 to 22)          | 59.8 (41.8 to 78.7)       | 31.6 (22.6 to 41.2)       | 11.7 (7.4 to 16.9)       | 52.3 (37.5 to 68)       | -10.3 (-23.2 to 4.2)      | -20.6 (-46.7 to 16.1)     | -12.5 (-23.4 to 0.1)    |                        |
|                  | Deaths                                   | 70.9 (53.4 to 90.6)     | 74.4 (51.4 to 96.5)       | 66.5 (50 to 89.5)         | 44.6 (35.3 to 57.7)       | 71.4 (55.5 to 90.7)      | 37.6 (28.4 to 52.1)     | -37 (-54.1 to -16.6)      | -4.1 (-31.8 to 41)        | -43.4 (-60.9 to -19.9)  |                        |
|                  | DALYs                                    | 1405.5 (1146.5 to 1754) | 1566 (1203.4 to 1958.8)   | 1314.9 (1041.7 to 1738.9) | 782.5 (640.1 to 988.2)    | 1145.1 (928.2 to 1401.4) | 675.4 (532.9 to 881.2)  | -44.3 (-57.4 to -28.6)    | -26.9 (-45.2 to -1.5)     | -48.6 (-62.2 to -31.1)  |                        |
| Alcohol use      | YLLs                                     | 1196.5 (933 to 1531.2)  | 1302.5 (941 to 1692.5)    | 1137.7 (862 to 1548.6)    | 623.4 (490.4 to 817.9)    | 933.9 (735.4 to 1194.4)  | 532.8 (397.6 to 739.9)  | -47.9 (-62.1 to -29.6)    | -28.3 (-49.5 to 3.5)      | -53.2 (-67.7 to -33.5)  |                        |
|                  | YLDs                                     | 209 (152.5 to 262.4)    | 263.5 (193.7 to 332.9)    | 177.2 (128.1 to 223.9)    | 159.1 (116.3 to 201.1)    | 211.1 (154 to 268.4)     | 142.7 (103.3 to 181.4)  | -23.9 (-28.3 to -19.4)    | -19.9 (-25.6 to -14)      | -19.5 (-25.2 to -13.1)  |                        |
|                  | Deaths                                   | 0.2 (0 to 0.5)          | -0.1 (-0.3 to 0.1)        | 0.5 (0.1 to 0.9)          | 0 (-0.1 to 0.2)           | -0.2 (-0.3 to 0)         | 0.1 (-0.1 to 0.3)       | -83.9 (-269.6 to 11)      | 45.8 (-388.3 to 614.9)    | -79.7 (-142.3 to -47.6) |                        |
|                  | DALYs                                    | 9.7 (2.4 to 18.5)       | -1.5 (-5.3 to 2.7)        | 15.3 (4.5 to 28.1)        | 2.5 (-0.8 to 6.3)         | -2.5 (-4.9 to 0)         | 4 (-0.3 to 9)           | -74.3 (-116.5 to -43.5)   | 71.2 (-1117.2 to 1156.5)  | -73.9 (-103 to -49.5)   |                        |
|                  | YLLs                                     | 8.8 (2.5 to 16.5)       | -0.7 (-3.9 to 2.9)        | 13.6 (4.2 to 25.4)        | 2.1 (-0.4 to 5.2)         | -1.8 (-3.9 to 0.1)       | 3.2 (0.1 to 7.3)        | -76.4 (-106.8 to -49.5)   | 158.1 (-1492.1 to 1525.8) | -76.1 (-97.7 to -53.2)  |                        |
|                  | YLLs                                     | 35.2 (24.9 to 46.6)     | 14.8 (9.2 to 22)          | 59.8 (41.8 to 78.7)       | 31.6 (22.6 to 41.2)       | 11.7 (7.4 to 16.9)       | 52.3 (37.5 to 68)       | -10.3 (-23.2 to 4.2)      | -20.6 (-46.7 to 16.1)     | -12.5 (-23.4 to 0.1)    |                        |
| Qatar            | All risk factors                         | Deaths                  | 70.9 (53.4 to 90.6)       | 74.4 (51.4 to 96.5)       | 66.5 (50 to 89.5)         | 44.6 (35.3 to 57.7)      | 71.4 (55.5 to 90.7)     | 37.6 (28.4 to 52.1)       | -37 (-54.1 to -16.6)      | -4.1 (-31.8 to 41)      | -43.4 (-60.9 to -19.9) |
|                  | DALYs                                    | 1405.5 (1146.5 to 1754) | 1566 (1203.4 to 1958.8)   | 1314.9 (1041.7 to 1738.9) | 782.5 (640.1 to 988.2)    | 1145.1 (928.2 to 1401.4) | 675.4 (532.9 to 881.2)  | -44.3 (-57.4 to -28.6)    | -26.9 (-45.2 to -1.5)     | -48.6 (-62.2 to -31.1)  |                        |
|                  | YLLs                                     | 1196.5 (933 to 1531.2)  | 1302.5 (941 to 1692.5)    | 1137.7 (862 to 1548.6)    | 623.4 (490.4 to 817.9)    | 933.9 (735.4 to 1194.4)  | 532.8 (397.6 to 739.9)  | -47.9 (-62.1 to -29.6)    | -28.3 (-49.5 to 3.5)      | -53.2 (-67.7 to -33.5)  |                        |
|                  | YLDs                                     | 209 (152.5 to 262.4)    | 263.5 (193.7 to 332.9)    | 177.2 (128.1 to 223.9)    | 159.1 (116.3 to 201.1)    | 211.1 (154 to 268.4)     | 142.7 (103.3 to 181.4)  | -23.9 (-28.3 to -19.4)    | -19.9 (-25.6 to -14)      | -19.5 (-25.2 to -13.1)  |                        |
|                  | Deaths                                   | 0.2 (0 to 0.5)          | -0.1 (-0.3 to 0.1)        | 0.5 (0.1 to 0.9)          | 0 (-0.1 to 0.2)           | -0.2 (-0.3 to 0)         | 0.1 (-0.1 to 0.3)       | -83.9 (-269.6 to 11)      | 45.8 (-388.3 to 614.9)    | -79.7 (-142.3 to -47.6) |                        |
|                  | DALYs                                    | 9.7 (2.4 to 18.5)       | -1.5 (-5.3 to 2.7)        | 15.3 (4.5 to 28.1)        | 2.5 (-0.8 to 6.3)         | -2.5 (-4.9 to 0)         | 4 (-0.3 to 9)           | -74.3 (-116.5 to -43.5)   | 71.2 (-1117.2 to 1156.5)  | -73.9 (-103 to -49.5)   |                        |
| YLLs             | 8.8 (2.5 to 16.5)                        | -0.7 (-3.9 to 2.9)      | 13.6 (4.2 to 25.4)        | 2.1 (-0.4 to 5.2)         | -1.8 (-3.9 to 0.1)        | 3.2 (0.1 to 7.3)         | -76.4 (-106.8 to -49.5) | 158.1 (-1492.1 to 1525.8) | -76.1 (-97.7 to -53.2)    |                         |                        |

| Location | Risk factor                              | Measure | 1990                   |                         |                         | 2019                   |                        |                        | % Change (1990 to 2019) |                        |                        |
|----------|------------------------------------------|---------|------------------------|-------------------------|-------------------------|------------------------|------------------------|------------------------|-------------------------|------------------------|------------------------|
|          |                                          |         | Both                   | Female                  | Male                    | Both                   | Female                 | Male                   | Both                    | Female                 | Male                   |
|          |                                          | YLDs    | 0.9 (-0.2 to 2.1)      | -0.8 (-1.5 to 0)        | 1.7 (0.2 to 3.5)        | 0.4 (-0.5 to 1.4)      | -0.7 (-1.3 to -0.1)    | 0.7 (-0.4 to 2)        | -54.4 (-307.7 to 135.7) | -8.9 (-52.2 to 77.7)   | -55.3 (-188.2 to 3.3)  |
|          | Ambient particulate matter pollution     | Deaths  | 26.4 (19.5 to 34.9)    | 28.1 (19.4 to 37.2)     | 25 (18.5 to 34.8)       | 15.5 (11.9 to 20.7)    | 24.3 (18.8 to 31.4)    | 13 (9.6 to 18.4)       | -41.5 (-57.6 to -21.2)  | -13.4 (-39.3 to 25.3)  | -48.1 (-64 to -26.1)   |
|          |                                          | DALYs   | 592.4 (466.3 to 758)   | 676 (521.4 to 864.2)    | 553.3 (427 to 748.5)    | 311.4 (248 to 397)     | 445.9 (353.8 to 559.3) | 270 (208.1 to 354.9)   | -47.4 (-59.4 to -32.2)  | -34 (-50.8 to -11.9)   | -51.2 (-63.9 to -34.3) |
|          |                                          | YLLs    | 498.6 (373.5 to 654.1) | 555.9 (398.2 to 735.4)  | 473.3 (350.4 to 671.1)  | 240.7 (183.4 to 321.2) | 350.9 (272.3 to 457.4) | 206.9 (152.2 to 289.7) | -51.7 (-64.6 to -34.1)  | -36.9 (-55.8 to -8.8)  | -56.3 (-70.3 to -37.1) |
|          | Diet high in red meat                    | YLDs    | 93.7 (66.8 to 120.9)   | 120.1 (85.4 to 154)     | 80.1 (56.2 to 103.2)    | 70.8 (50.5 to 90.1)    | 95 (67.5 to 122.7)     | 63.1 (45 to 81.3)      | -24.5 (-29.3 to -19.2)  | -20.9 (-27 to -14.5)   | -21.2 (-27.3 to -14.6) |
|          |                                          | Deaths  | 3.6 (1.7 to 5.6)       | 3.9 (1.8 to 6.2)        | 3.4 (1.5 to 5.5)        | 2.1 (0.9 to 3.3)       | 3.2 (1.3 to 5.1)       | 1.8 (0.8 to 2.9)       | -42.3 (-61.4 to -17.5)  | -18.8 (-50.6 to 30.4)  | -47.3 (-66.9 to -19.7) |
|          |                                          | DALYs   | 92.5 (45.9 to 140.7)   | 109.9 (52.4 to 166.8)   | 85.3 (40.6 to 134.9)    | 48.6 (23.2 to 71.8)    | 66.9 (30.9 to 100.9)   | 43.2 (20.5 to 64.7)    | -47.4 (-62.3 to -29.3)  | -39.1 (-60.1 to -10.9) | -49.4 (-65.2 to -26.1) |
|          |                                          | YLLs    | 76.7 (36.7 to 122.3)   | 89.3 (39.3 to 141.6)    | 71.8 (33.9 to 117.8)    | 36 (17 to 55.1)        | 49.9 (22.3 to 79.5)    | 31.8 (14.5 to 50.3)    | -53.1 (-67.8 to -33.8)  | -44.1 (-65.7 to -11.5) | -55.7 (-71.1 to -31.5) |
|          | Diet high in sodium                      | YLDs    | 15.7 (6.8 to 23.9)     | 20.6 (9 to 32)          | 13.6 (5.8 to 21.2)      | 12.7 (5.4 to 19.4)     | 17 (7.1 to 25.7)       | 11.4 (4.8 to 17.6)     | -19.4 (-32.4 to -1.6)   | -17.8 (-36.1 to 5.4)   | -16.1 (-33.1 to 9.1)   |
|          |                                          | Deaths  | 1.3 (0.2 to 5.4)       | 1 (0.2 to 4.1)          | 1.6 (0.2 to 6.7)        | 0.8 (0.1 to 3.1)       | 0.8 (0.2 to 2.9)       | 0.8 (0.1 to 3.1)       | -39.3 (-65.5 to 15.8)   | -20.3 (-55.6 to 91)    | -49.4 (-72.5 to 33.8)  |
|          |                                          | DALYs   | 31.4 (3.8 to 127.1)    | 23.5 (4.5 to 99.8)      | 36.4 (2.9 to 149.1)     | 17 (2.2 to 65.9)       | 14.6 (3.5 to 59.6)     | 17.7 (1.6 to 68.2)     | -46 (-66 to -4)         | -37.7 (-65 to 51.9)    | -51.5 (-69.9 to 0.4)   |
|          |                                          | YLLs    | 26.6 (3.2 to 109.3)    | 19.4 (3.6 to 84.4)      | 31.2 (2.5 to 129.3)     | 13 (1.7 to 51.2)       | 11.5 (2.7 to 46.3)     | 13.4 (1.2 to 53.1)     | -51.1 (-70.3 to -5.5)   | -40.5 (-67.1 to 53)    | -56.9 (-75.3 to -4.4)  |
|          | Diet low in fiber                        | YLDs    | 4.8 (0.5 to 19.4)      | 4.1 (0.7 to 17.3)       | 5.2 (0.4 to 20.6)       | 4 (0.4 to 15.2)        | 3.1 (0.6 to 12.9)      | 4.2 (0.3 to 16.5)      | -18.1 (-51.2 to 28.3)   | -24.5 (-61.6 to 61.3)  | -18.6 (-47.3 to 47.9)  |
|          |                                          | Deaths  | 0.4 (0.2 to 0.8)       | 0.4 (0.2 to 0.8)        | 0.4 (0.2 to 0.8)        | 0.2 (0.1 to 0.3)       | 0.2 (0.2 to 0.5)       | 0.1 (0.1 to 0.3)       | -54.2 (-74.4 to -16.1)  | -32.5 (-65.4 to 29.7)  | -59.6 (-80.9 to -19.4) |
|          |                                          | DALYs   | 7.4 (3.4 to 15.3)      | 8.1 (3.7 to 17.9)       | 7.2 (3.1 to 16)         | 2.8 (1.7 to 5.2)       | 3.9 (2.5 to 7.3)       | 2.5 (1.5 to 5.1)       | -61.5 (-77 to -33.4)    | -51.4 (-75.5 to -12.2) | -64.6 (-81.2 to -34.5) |
|          |                                          | YLLs    | 6.2 (2.8 to 13)        | 6.6 (3 to 14.9)         | 6.1 (2.6 to 13.3)       | 2.2 (1.4 to 4.2)       | 3.1 (2 to 5.9)         | 2 (1.1 to 4)           | -63.8 (-79.3 to -34.8)  | -52.5 (-76.2 to -11.4) | -67.5 (-83.4 to -37.7) |
|          | Diet low in fruits                       | YLDs    | 1.2 (0.5 to 2.6)       | 1.4 (0.6 to 3.4)        | 1.1 (0.4 to 2.5)        | 0.6 (0.3 to 1.2)       | 0.8 (0.4 to 1.7)       | 0.6 (0.3 to 1.2)       | -49.4 (-69 to -21.4)    | -46.5 (-72.4 to -2.4)  | -48.1 (-71.5 to -10.8) |
|          |                                          | Deaths  | 1.1 (0.5 to 2)         | 1.4 (0.6 to 2.6)        | 1 (0.4 to 2)            | 0.5 (0.2 to 0.9)       | 0.8 (0.3 to 1.7)       | 0.4 (0.2 to 0.8)       | -60.1 (-80.2 to -23)    | -42.3 (-77 to 24.7)    | -62.4 (-84.8 to -14.3) |
|          |                                          | DALYs   | 28.9 (13.5 to 50.5)    | 38.3 (16.3 to 72.3)     | 24.8 (10.6 to 47.8)     | 10.8 (5.2 to 19.3)     | 16.2 (7.2 to 31.2)     | 9.2 (4 to 17.8)        | -62.8 (-78.3 to -36.6)  | -57.7 (-79.7 to -19.8) | -63.1 (-82 to -26.8)   |
|          |                                          | YLLs    | 24.3 (11.5 to 42.8)    | 31.7 (13.7 to 60.8)     | 21.1 (9 to 40.9)        | 8.1 (3.9 to 14.7)      | 12.2 (5.3 to 24.5)     | 6.9 (3 to 13.2)        | -66.9 (-81.6 to -40.3)  | -61.5 (-82.6 to -21.9) | -67.5 (-85.5 to -30.7) |
|          | Diet low in vegetables                   | YLDs    | 4.6 (1.8 to 8.7)       | 6.5 (2.5 to 12.6)       | 3.7 (1.4 to 7.6)        | 2.7 (1 to 5.2)         | 4 (1.5 to 8.3)         | 2.3 (0.8 to 4.9)       | -41.4 (-64.4 to -9.2)   | -39 (-68.4 to 7.3)     | -38.3 (-68.8 to 11.8)  |
|          |                                          | Deaths  | 0.4 (0.2 to 0.8)       | 0.4 (0.2 to 0.8)        | 0.4 (0.2 to 0.8)        | 0.1 (0.1 to 0.2)       | 0.2 (0.1 to 0.4)       | 0.1 (0.1 to 0.2)       | -63.1 (-81.6 to -28.6)  | -41.9 (-73.8 to 24.6)  | -68.7 (-85.5 to -33)   |
|          |                                          | DALYs   | 7 (3.2 to 15.2)        | 7.2 (3.4 to 16.6)       | 7 (2.9 to 16)           | 2.2 (1.6 to 3.6)       | 3.2 (2.3 to 5.5)       | 2 (1.3 to 3.3)         | -68.2 (-83.4 to -40)    | -55.9 (-79.2 to -12.6) | -72.1 (-86.8 to -43.5) |
|          |                                          | YLLs    | 6 (2.6 to 13.3)        | 6 (2.7 to 14.1)         | 6.1 (2.5 to 13.9)       | 1.8 (1.2 to 2.9)       | 2.6 (1.8 to 4.7)       | 1.6 (1 to 2.7)         | -69.9 (-84.8 to -40.7)  | -56.2 (-80.9 to -7.2)  | -74.2 (-88.2 to -45.4) |
|          | Diet low in whole grains                 | YLDs    | 1 (0.4 to 2.2)         | 1.2 (0.6 to 2.6)        | 1 (0.4 to 2.2)          | 0.4 (0.3 to 0.7)       | 0.5 (0.4 to 0.9)       | 0.4 (0.2 to 0.7)       | -58.9 (-76.3 to -27.8)  | -54.3 (-75.5 to -19.7) | -58.7 (-78.7 to -22.2) |
|          |                                          | Deaths  | 2.7 (1 to 4.2)         | 2.7 (1 to 4.4)          | 2.7 (1 to 4.4)          | 1.7 (0.5 to 2.6)       | 2.6 (0.8 to 4.1)       | 1.5 (0.5 to 2.4)       | -38 (-56.9 to -17.3)    | -3.6 (-39.4 to 46.7)   | -45.4 (-63.5 to -21.5) |
|          |                                          | DALYs   | 56.2 (19.8 to 85.2)    | 59.8 (20.6 to 92.4)     | 54 (19.4 to 86.1)       | 31.6 (9.3 to 47.8)     | 45.3 (13.6 to 68.9)    | 27.6 (8.2 to 42.9)     | -43.8 (-58.3 to -30.2)  | -24.3 (-46.6 to -0.5)  | -49 (-63.6 to -31.8)   |
|          |                                          | YLLs    | 42.4 (15.1 to 66.4)    | 42.4 (14.6 to 68.3)     | 42.2 (15.4 to 69.9)     | 21.6 (6.6 to 33.6)     | 32 (10 to 50.6)        | 18.6 (5.4 to 31)       | -49.1 (-64.4 to -31.1)  | -24.3 (-50.8 to 14.6)  | -55.9 (-70.9 to -34.4) |
|          | High body-mass index                     | YLDs    | 13.8 (4.7 to 21.5)     | 17.4 (5.5 to 27.6)      | 11.9 (4.1 to 18.7)      | 10 (2.8 to 15.7)       | 13.2 (3.7 to 21.1)     | 9 (2.6 to 14.3)        | -27.7 (-40.3 to -21.6)  | -24.1 (-37.7 to -16.2) | -24.6 (-38.4 to -15.5) |
|          |                                          | Deaths  | 18.7 (11.1 to 27.6)    | 23 (14.4 to 32.8)       | 16 (8.9 to 25.3)        | 11.4 (6.6 to 17.4)     | 17.6 (9.5 to 27.6)     | 9.5 (5.4 to 14.7)      | -38.9 (-57.4 to -13.9)  | -23.4 (-52.3 to 16.8)  | -40.6 (-62.2 to -8.3)  |
|          |                                          | DALYs   | 565.2 (370.1 to 788.8) | 748.2 (529.6 to 1001.9) | 483.7 (296.6 to 715.1)  | 324.2 (225.4 to 435.2) | 456 (316.5 to 615.6)   | 281.7 (191.9 to 385.9) | -42.6 (-56.6 to -24.5)  | -39 (-55.8 to -17.9)   | -41.8 (-58.9 to -18.1) |
|          |                                          | YLLs    | 471.3 (300 to 679.7)   | 612.3 (411.7 to 841.1)  | 408.7 (244 to 626.6)    | 237.7 (157.4 to 332.1) | 334.9 (214.8 to 471.6) | 205.7 (134.5 to 299.9) | -49.6 (-64.5 to -28.5)  | -45.3 (-63.2 to -19.2) | -49.7 (-67.2 to -23.9) |
|          | High fasting plasma glucose              | YLDs    | 93.8 (58 to 132.8)     | 135.9 (91.1 to 188.2)   | 75 (43.8 to 109.2)      | 86.6 (57.6 to 117.7)   | 121.1 (82.6 to 161.9)  | 75.9 (50.1 to 105)     | -7.7 (-15.6 to 4.2)     | -10.9 (-18.6 to -1.9)  | 1.3 (-10.9 to 20.3)    |
|          |                                          | Deaths  | 26.1 (14.6 to 48.4)    | 26.4 (14.6 to 48.2)     | 25.4 (13.8 to 47.1)     | 15.1 (8.2 to 28.9)     | 22.5 (12.8 to 43)      | 13.1 (6.9 to 25.8)     | -42.3 (-61.4 to -16.6)  | -14.9 (-45 to 31.4)    | -48.4 (-67.6 to -20)   |
|          |                                          | DALYs   | 496.9 (314.4 to 804.9) | 519.3 (323.2 to 823.1)  | 481 (290 to 801.2)      | 269.3 (169.1 to 439.4) | 369.2 (232.9 to 619.3) | 239.5 (143.4 to 405.8) | -45.8 (-61.2 to -25.7)  | -28.9 (-51.3 to 3.1)   | -50.2 (-66.2 to -27.1) |
|          |                                          | YLLs    | 425.2 (263.3 to 693.1) | 432.4 (257.8 to 691.2)  | 419.2 (252 to 700.7)    | 213.3 (127.1 to 365.6) | 299.4 (183.4 to 522.1) | 187.9 (107 to 335.1)   | -49.8 (-65.9 to -27.8)  | -30.8 (-55.1 to 8.2)   | -55.2 (-71.4 to -30.9) |
|          | High LDL cholesterol                     | YLDs    | 71.7 (40.3 to 115.9)   | 86.9 (49.4 to 142)      | 61.8 (34.5 to 100.7)    | 56 (32.9 to 87.9)      | 69.9 (42.1 to 111.1)   | 51.6 (29.9 to 82.2)    | -21.9 (-35.1 to -4.8)   | -19.6 (-36.8 to 5.3)   | -16.5 (-32.9 to 3.1)   |
|          |                                          | Deaths  | 9.4 (2.6 to 22)        | 9.9 (2.7 to 23.8)       | 8.5 (2.5 to 19.8)       | 6.6 (1.4 to 16.4)      | 11.5 (2.3 to 28.5)     | 5.4 (1.1 to 13.4)      | -29.6 (-55.3 to -4.3)   | 16.2 (-33.5 to 72.3)   | -36.3 (-61.8 to -6.9)  |
|          |                                          | DALYs   | 188.1 (92 to 346)      | 212.5 (111.6 to 392.1)  | 171.3 (84.9 to 308.7)   | 119.4 (51.4 to 239.5)  | 187.4 (73.2 to 378.2)  | 100.2 (44.3 to 198.2)  | -36.5 (-53.2 to -19.2)  | -11.8 (-40.7 to 21.2)  | -41.5 (-58.5 to -21)   |
|          |                                          | YLLs    | 140.8 (61.3 to 277.2)  | 149.3 (63.1 to 302.8)   | 132.2 (58.1 to 259.6)   | 81.8 (25.8 to 183.4)   | 133.8 (36.4 to 305.5)  | 67.5 (22.3 to 149.7)   | -41.9 (-65.7 to -18.5)  | -10.4 (-53.3 to 37)    | -49 (-69.9 to -22.9)   |
|          | High systolic blood pressure             | YLDs    | 47.3 (27.6 to 77.4)    | 63.2 (38.1 to 101.8)    | 39.1 (23.1 to 63.7)     | 37.6 (22.3 to 60.6)    | 53.6 (32.1 to 86.1)    | 32.8 (19 to 53.1)      | -20.5 (-27.1 to -13)    | -15.1 (-22.9 to -6.3)  | -16.2 (-25.7 to -5.7)  |
|          |                                          | Deaths  | 41 (29.4 to 56.6)      | 43.8 (28.9 to 60.5)     | 37.2 (26.2 to 53.5)     | 25.5 (18 to 36)        | 41.3 (28 to 58.7)      | 21.3 (14.4 to 30.9)    | -37.8 (-55.4 to -15.9)  | -5.6 (-36.6 to 47.9)   | -42.7 (-60.9 to -15.7) |
|          |                                          | DALYs   | 838.2 (644.2 to 1099)  | 929.7 (669.4 to 1221)   | 774.3 (580.2 to 1076.6) | 465 (351.9 to 607)     | 655 (479.3 to 884.1)   | 407.6 (299 to 548.3)   | -44.5 (-58 to -27.8)    | -29.5 (-50.9 to 1.6)   | -47.4 (-61.7 to -26.8) |
|          |                                          | YLLs    | 714.4 (527.4 to 970.1) | 776.3 (528.7 to 1037.9) | 669.2 (478.8 to 961.6)  | 369.9 (266.8 to 509.2) | 541 (380.2 to 749.2)   | 319.1 (223.2 to 454.5) | -48.2 (-63.3 to -29.4)  | -30.3 (-54 to 6.7)     | -52.3 (-67.4 to -30.1) |
|          |                                          | YLDs    | 123.8 (86.9 to 164.2)  | 153.4 (106.3 to 207.5)  | 105.1 (74.3 to 139.1)   | 95.1 (66.7 to 124.2)   | 114 (79.7 to 152.7)    | 88.5 (61.4 to 116)     | -23.2 (-31.8 to -13.7)  | -25.7 (-38.8 to -8)    | -15.9 (-26.8 to -3)    |
|          | High temperature                         | Deaths  | 4.7 (0.6 to 9.8)       | 4.9 (0.6 to 10.5)       | 4.4 (0.7 to 9.9)        | 3.3 (1.2 to 6.2)       | 5.3 (1.9 to 9.3)       | 2.8 (1 to 5.4)         | -29.6 (-65.3 to -2.1)   | 8 (-49.2 to 67.5)      | -36.8 (-69.7 to -8.7)  |
|          |                                          | YLLs    | 78.1 (11.1 to 162.7)   | 84.5 (11.6 to 176.1)    | 74.7 (11.3 to 168.8)    | 45 (15.8 to 81.7)      | 68 (24.3 to 120.1)     | 38.4 (13.1 to 75)      | -42.4 (-72.1 to -20.9)  | -19.4 (-63.6 to 21.9)  | -48.7 (-75.3 to -25.6) |
|          | Household air pollution from solid fuels | Deaths  | 0.1 (0 to 0.2)         | 0.1 (0 to 0.3)          | 0.1 (0 to 0.2)          | 0 (0 to 0)             | 0 (0 to 0)             | 0 (0 to 0)             | -99 (-99.7 to -97.3)    | -98.4 (-99.5 to -95.4) | -99.1 (-99.7 to -97.4) |
|          |                                          | DALYs   | 2.3 (0.8 to 5)         | 3.2 (1.2 to 7)          | 1.7 (0.6 to 3.8)        | 0 (0 to 0.1)           | 0 (0 to 0.1)           | 0 (0 to 0)             | -99.1 (-99.7 to -97.5)  | -98.8 (-99.6 to -96.7) | -99.1 (-99.7 to -97.5) |



| Location          | Risk factor                          | Measure                | 1990                      |                           |                           | 2019                      |                           |                           | % Change (1990 to 2019) |                           |                         |
|-------------------|--------------------------------------|------------------------|---------------------------|---------------------------|---------------------------|---------------------------|---------------------------|---------------------------|-------------------------|---------------------------|-------------------------|
|                   |                                      |                        | Both                      | Female                    | Male                      | Both                      | Female                    | Male                      | Both                    | Female                    | Male                    |
|                   | Kidney dysfunction                   | YLLs                   | 1.9 (0.7 to 4.2)          | 2.7 (1 to 5.8)            | 1.5 (0.5 to 3.3)          | 0 (0 to 0)                | 0 (0 to 0.1)              | 0 (0 to 0)                | -99.2 (-99.7 to -97.7)  | -98.8 (-99.7 to -96.8)    | -99.2 (-99.8 to -97.8)  |
|                   |                                      | YLDs                   | 0.4 (0.1 to 0.8)          | 0.6 (0.2 to 1.3)          | 0.2 (0.1 to 0.6)          | 0 (0 to 0)                | 0 (0 to 0)                | 0 (0 to 0)                | -98.7 (-99.6 to -96.5)  | -98.6 (-99.5 to -96.2)    | -98.6 (-99.5 to -96.1)  |
|                   |                                      | Deaths                 | 6.8 (4.2 to 10)           | 7.8 (4.5 to 11.9)         | 5.9 (3.7 to 8.7)          | 5.4 (2.8 to 8.1)          | 8.6 (4.2 to 13.3)         | 4.4 (2.2 to 6.7)          | -21.5 (-48.7 to 9.9)    | 10.2 (-34.7 to 79)        | -25.9 (-54.2 to 8.9)    |
|                   |                                      | DALYs                  | 138.3 (98 to 186.4)       | 171 (114.8 to 235.8)      | 117.7 (83.2 to 162.5)     | 100.2 (65.7 to 137.5)     | 154.5 (98.8 to 213.6)     | 82.2 (52.8 to 115.5)      | -27.5 (-46.5 to -4.4)   | -9.6 (-37 to 31.9)        | -30.1 (-50.5 to -3.4)   |
|                   | Lead exposure                        | YLLs                   | 115.1 (80.1 to 159.8)     | 137.7 (87 to 199.2)       | 100.5 (68.3 to 144.5)     | 77.9 (47.8 to 109.9)      | 122.2 (73.2 to 177.1)     | 63.3 (37.9 to 93.8)       | -32.3 (-54 to -5.5)     | -11.3 (-44.6 to 44.2)     | -37 (-59.7 to -6.7)     |
|                   |                                      | YLDs                   | 23.2 (15.7 to 31.8)       | 33.3 (22.6 to 45.4)       | 17.2 (11.6 to 23.5)       | 22.3 (15 to 30.1)         | 32.4 (22.1 to 43.2)       | 19 (12.6 to 25.8)         | -3.7 (-10.7 to 4.4)     | -2.9 (-11.5 to 5.8)       | 10.4 (-0.2 to 22.8)     |
|                   |                                      | Deaths                 | 1.5 (0.2 to 3)            | 1.4 (0.1 to 3)            | 1.5 (0.3 to 3.1)          | 1 (0.3 to 2)              | 1.4 (0.2 to 2.8)          | 0.9 (0.3 to 1.9)          | -31.8 (-50.8 to 36.5)   | -2.7 (-32.7 to 151.3)     | -39.5 (-59.5 to 11.5)   |
|                   |                                      | DALYs                  | 30.9 (4 to 63.6)          | 29.5 (1.5 to 65.3)        | 31.8 (5.3 to 63.8)        | 16.2 (3.3 to 33.3)        | 19.6 (2.6 to 42.4)        | 15.3 (3.6 to 31.2)        | -47.6 (-61.2 to -3.7)   | -33.5 (-52.3 to 100.4)    | -52.1 (-66.3 to -19.2)  |
|                   | Low physical activity                | YLLs                   | 26.4 (3.4 to 54.7)        | 24.7 (1.4 to 55)          | 27.6 (4.6 to 56)          | 13.3 (2.9 to 27.6)        | 16.6 (2.4 to 35.2)        | 12.3 (3 to 25.7)          | -49.9 (-64.1 to -4)     | -32.7 (-54 to 110.4)      | -55.3 (-70.5 to -20.8)  |
|                   |                                      | YLDs                   | 4.5 (0.5 to 9.7)          | 4.8 (0.2 to 11.3)         | 4.2 (0.6 to 8.8)          | 2.9 (0.5 to 6.6)          | 3 (0.2 to 7.4)            | 2.9 (0.5 to 6.3)          | -34.4 (-44.5 to -4.6)   | -37.6 (-54.6 to 28.2)     | -31.2 (-44.2 to -4)     |
|                   |                                      | Deaths                 | 5.4 (1.3 to 11.1)         | 5.5 (1.4 to 11.2)         | 5 (1 to 10.4)             | 4.2 (1.1 to 8.3)          | 7.1 (1.9 to 13.7)         | 3.5 (0.8 to 7)            | -21 (-43.3 to 12)       | 29.2 (-11.3 to 103.2)     | -28.9 (-51.7 to 7.2)    |
|                   |                                      | DALYs                  | 79.3 (17.6 to 170.6)      | 85.4 (20.6 to 179.1)      | 73.1 (14.3 to 162.2)      | 57.8 (13.5 to 118.3)      | 93.4 (23.1 to 183.3)      | 48 (10.3 to 99.8)         | -27.1 (-44.5 to -1.1)   | 9.4 (-19.7 to 61.2)       | -34.4 (-52 to -3.7)     |
|                   | Low temperature                      | YLLs                   | 64.7 (14.7 to 141)        | 66.7 (16.2 to 141.7)      | 61.4 (12.1 to 134.8)      | 45.8 (11.4 to 91.3)       | 76.4 (19.6 to 151)        | 37.6 (8.6 to 77.2)        | -29.1 (-49.6 to 1.1)    | 14.5 (-21.7 to 80.9)      | -38.7 (-58.1 to -2.3)   |
|                   |                                      | YLDs                   | 14.7 (2.8 to 34.1)        | 18.6 (3.8 to 41.9)        | 11.8 (2 to 29)            | 12 (2.3 to 27.9)          | 17 (3.6 to 38.9)          | 10.4 (1.7 to 24.5)        | -18.4 (-28.1 to -9)     | -8.6 (-20.2 to 7.3)       | -11.7 (-22.5 to 4.9)    |
|                   |                                      | Deaths                 | 3.4 (-4.7 to 11.5)        | 3.6 (-4.9 to 11.8)        | 3.2 (-4.3 to 10.5)        | 2 (-2.6 to 6.2)           | 3.2 (-4.1 to 10)          | 1.7 (-2.2 to 5.3)         | -                       | -                         | -                       |
|                   |                                      | YLLs                   | 57.2 (-77.8 to 190.1)     | 61.7 (-83.9 to 203.4)     | 54.9 (-73.3 to 178.9)     | 27.3 (-35.9 to 85.4)      | 41.3 (-53.8 to 128.4)     | 23.3 (-30.9 to 74.1)      | -                       | -                         | -                       |
|                   | Secondhand smoke                     | Deaths                 | 2.8 (2 to 3.9)            | 3.1 (2.1 to 4.3)          | 2.7 (1.8 to 4)            | 1.4 (0.9 to 1.9)          | 2.3 (1.6 to 3.2)          | 1.1 (0.7 to 1.6)          | -50.6 (-64.8 to -30.8)  | -25.9 (-49.8 to 10.6)     | -58.9 (-73.2 to -37.6)  |
|                   |                                      | DALYs                  | 63.3 (44 to 85.8)         | 82.9 (56.9 to 112.9)      | 57 (38.4 to 80.6)         | 27.2 (18.9 to 36.6)       | 46 (32.5 to 62.3)         | 21.4 (14.5 to 30.5)       | -57.1 (-68.8 to -42.8)  | -44.5 (-59.9 to -21.6)    | -62.4 (-74.2 to -45.6)  |
|                   | Smoking                              | YLLs                   | 56.9 (39.5 to 78.1)       | 73.2 (49 to 101.3)        | 52 (34 to 75.2)           | 22.8 (15.4 to 32)         | 38.3 (26.1 to 53)         | 18.1 (11.8 to 26.7)       | -59.9 (-71.5 to -44.4)  | -47.7 (-63.9 to -21.8)    | -65.1 (-77.4 to -47.1)  |
|                   |                                      | YLDs                   | 6.4 (4.1 to 8.8)          | 9.7 (6.3 to 13.3)         | 5.1 (3.3 to 7.2)          | 4.3 (2.8 to 5.9)          | 7.7 (5.1 to 10.6)         | 3.3 (2.2 to 4.6)          | -32.5 (-39.5 to -24.5)  | -20.5 (-29.1 to -10.3)    | -35.2 (-44.5 to -23.8)  |
| Deaths            |                                      | 6.1 (4.5 to 8.6)       | 1.4 (0.8 to 2.2)          | 9.7 (7 to 13.7)           | 3.1 (2.3 to 4.3)          | 0.7 (0.4 to 1)            | 3.9 (2.8 to 5.5)          | -49.2 (-66.2 to -25.6)    | -52.5 (-71.9 to -16.5)  | -59.4 (-72.8 to -39.7)    |                         |
| DALYs             |                                      | 180.8 (138.4 to 243.1) | 44.1 (27.9 to 68.2)       | 257.4 (194.6 to 346.1)    | 84.9 (65.5 to 108.6)      | 18.7 (12.8 to 26.9)       | 106.5 (81.9 to 136.8)     | -53 (-66.5 to -35.3)      | -57.7 (-75.1 to -29.6)  | -58.6 (-70.6 to -42.2)    |                         |
|                   | YLLs                                 | 151.4 (111.3 to 213.1) | 35.7 (21.8 to 57.1)       | 217.8 (157.1 to 307.3)    | 62.3 (45.2 to 85.4)       | 13.4 (8.7 to 20)          | 78.4 (56.7 to 108.5)      | -58.9 (-73.1 to -39.2)    | -62.6 (-79 to -33.5)    | -64 (-76.3 to -45.9)      |                         |
|                   | YLDs                                 | 29.4 (20.8 to 39.3)    | 8.4 (5.1 to 12.9)         | 39.7 (28.1 to 52.6)       | 22.6 (16.1 to 29.9)       | 5.3 (3.3 to 7.9)          | 28.1 (20 to 37.2)         | -23.1 (-34.1 to -11.1)    | -36.7 (-58.7 to -6.7)   | -29.1 (-38.8 to -18.2)    |                         |
| Saudi Arabia      | All risk factors                     | Deaths                 | 125.9 (96.8 to 154.3)     | 127.7 (97.3 to 161.2)     | 124.6 (90.2 to 154.6)     | 89.1 (68.5 to 105.4)      | 88.8 (68.3 to 110.8)      | 88.5 (63.7 to 104.8)      | -29.3 (-47.1 to -5)     | -30.5 (-50.8 to -3.5)     | -29 (-46 to -3.2)       |
|                   |                                      | DALYs                  | 2548 (2004.1 to 3138.5)   | 2674.4 (2098.1 to 3331.7) | 2463.4 (1815.8 to 3089.6) | 1894.5 (1500.9 to 2230)   | 1935.8 (1552.6 to 2364.6) | 1860.8 (1395.2 to 2201.1) | -25.6 (-44 to -0.7)     | -27.6 (-47.7 to -1.8)     | -24.5 (-43.4 to 4.1)    |
|                   |                                      | YLLs                   | 2316.3 (1771.2 to 2907.7) | 2387.4 (1809.9 to 3046.7) | 2271.7 (1625.9 to 2901.7) | 1633.7 (1262.5 to 1962.6) | 1609 (1232.1 to 2030.2)   | 1644.6 (1180.7 to 1981.9) | -29.5 (-48.8 to -2.2)   | -32.6 (-53.2 to -4.3)     | -27.6 (-47.2 to 3.2)    |
|                   |                                      | YLDs                   | 231.7 (168.7 to 303)      | 287 (205.1 to 381.9)      | 191.7 (138.1 to 249.8)    | 260.8 (191.6 to 331.2)    | 326.8 (239.3 to 416.2)    | 216.3 (156.1 to 277.4)    | 12.5 (3 to 22)          | 13.9 (2 to 26.3)          | 12.8 (3 to 23.5)        |
|                   | Alcohol use                          | Deaths                 | 0.6 (-0.1 to 1.4)         | 0 (-0.3 to 0.4)           | 1 (-0.1 to 2.3)           | 0.1 (-0.1 to 0.4)         | -0.1 (-0.2 to 0)          | 0.2 (-0.1 to 0.8)         | -82.2 (-223.3 to 59.1)  | -1278.8 (-810.6 to 517.8) | -77.6 (-204.2 to 34.9)  |
|                   |                                      | DALYs                  | 17.2 (-1.5 to 41.1)       | 1.8 (-4.9 to 11.2)        | 27.7 (-0.8 to 61.9)       | 4 (-2.6 to 14.2)          | -1.2 (-3.7 to 1.8)        | 7.4 (-2.9 to 22.7)        | -76.6 (-183.4 to 70.1)  | -165.5 (-692.1 to 504.8)  | -73.2 (-171.9 to -0.8)  |
|                   |                                      | YLLs                   | 16.2 (-1 to 38.1)         | 1.9 (-4.2 to 10.5)        | 26 (-0.5 to 58.2)         | 3.8 (-2.1 to 12.9)        | -0.8 (-2.8 to 1.9)        | 6.8 (-2.4 to 20.9)        | -76.5 (-169.4 to 68)    | -141.5 (-559.7 to 531.8)  | -73.7 (-182.5 to -4.5)  |
|                   |                                      | YLDs                   | 1 (-0.4 to 2.8)           | -0.1 (-0.8 to 0.8)        | 1.8 (-0.3 to 4.2)         | 0.2 (-0.5 to 1.3)         | -0.4 (-0.8 to 0.1)        | 0.6 (-0.6 to 2.2)         | -77.7 (-339.2 to 277.2) | 175.4 (-1009 to 763.2)    | -65.4 (-271.4 to 147.5) |
|                   | Ambient particulate matter pollution | Deaths                 | 23.4 (13 to 36.9)         | 21.6 (11.4 to 34.6)       | 25 (13.5 to 39.2)         | 31.3 (23.8 to 38.5)       | 31.4 (23.7 to 40.5)       | 31.1 (22.1 to 38.7)       | 33.5 (-15.5 to 150.3)   | 45.3 (-14.1 to 184.2)     | 24.2 (-20.7 to 126.1)   |
|                   |                                      | DALYs                  | 528 (287.5 to 834.8)      | 502.4 (260.8 to 819.3)    | 548.9 (297 to 868.2)      | 755.2 (585.6 to 932.5)    | 782.4 (604.3 to 981)      | 736.2 (544.5 to 911.6)    | 43 (-10.3 to 165.7)     | 55.7 (-5.8 to 203.4)      | 34.1 (-16.6 to 151.1)   |
|                   |                                      | YLLs                   | 478.4 (256 to 767.2)      | 446.3 (232 to 729.6)      | 503.9 (267.8 to 808.6)    | 647.3 (484.3 to 811.1)    | 645.4 (481.2 to 836)      | 647.5 (456 to 810)        | 35.3 (-17.5 to 155.3)   | 44.6 (-16.3 to 186)       | 28.5 (-21.7 to 144.8)   |
|                   | Diet high in red meat                | YLDs                   | 49.6 (24.4 to 79.7)       | 56.1 (26.3 to 94.9)       | 45 (22.9 to 70.5)         | 108 (77.6 to 138.7)       | 137 (98.3 to 177.6)       | 88.8 (62.8 to 114.4)      | 117.7 (51.3 to 281.4)   | 144.3 (63.2 to 352.7)     | 97.1 (39.2 to 242)      |
|                   |                                      | Deaths                 | 4.1 (1.5 to 6.9)          | 4.3 (1.5 to 7.1)          | 4.1 (1.4 to 6.8)          | 2.7 (0.9 to 4.5)          | 2.7 (0.9 to 4.6)          | 2.7 (0.9 to 4.4)          | -35 (-54.9 to -7.8)     | -37.2 (-58.8 to -8)       | -33.9 (-53.8 to -6.9)   |
|                   |                                      | DALYs                  | 106 (36.6 to 175.1)       | 115.2 (39.6 to 187.3)     | 100.3 (34.5 to 168.8)     | 73.2 (25.6 to 120.4)      | 76.6 (26.6 to 125.9)      | 71 (25.2 to 117.8)        | -30.9 (-52.4 to -2.7)   | -33.5 (-55.2 to -3.1)     | -29.2 (-52.2 to 1.9)    |
|                   | Diet high in sodium                  | YLLs                   | 95.2 (31.7 to 159.3)      | 101.5 (34.7 to 169.4)     | 91.4 (30.9 to 155.1)      | 62.3 (21.3 to 104.5)      | 62.6 (20.3 to 105.9)      | 62 (21.9 to 105.5)        | -34.6 (-56 to -4.1)     | -38.3 (-60 to -5.3)       | -32.2 (-55.2 to 1.1)    |
|                   |                                      | YLDs                   | 10.8 (3.7 to 18.2)        | 13.6 (4.6 to 23.1)        | 8.9 (3 to 14.9)           | 11 (3.6 to 18.5)          | 14 (4.5 to 23.4)          | 9 (3.1 to 15.2)           | 1.6 (-12.1 to 16)       | 2.7 (-13.4 to 20.4)       | 0.8 (-15.7 to 17.6)     |
|                   |                                      | Deaths                 | 2.5 (0.4 to 10.2)         | 1.8 (0.4 to 7.2)          | 3.1 (0.3 to 12.7)         | 1.8 (0.3 to 7.3)          | 1.1 (0.3 to 4.8)          | 2.2 (0.2 to 9.1)          | -28.9 (-60 to 30.6)     | -35.4 (-69.2 to 43.6)     | -28.4 (-64 to 53.1)     |
|                   |                                      | DALYs                  | 59.2 (7.3 to 241.4)       | 42 (7.8 to 168.9)         | 71.7 (5.4 to 291.3)       | 44.4 (5.4 to 176)         | 28.5 (5.7 to 121.1)       | 54.8 (4.3 to 215.5)       | -25.1 (-57.6 to 38)     | -32.2 (-67.9 to 60.7)     | -23.5 (-56.3 to 60)     |
|                   | Diet low in fiber                    | YLLs                   | 53.9 (6.5 to 223)         | 37.4 (6.9 to 151.7)       | 65.8 (5 to 267.3)         | 38.5 (4.6 to 154.5)       | 23.5 (4.7 to 100.6)       | 48.3 (3.8 to 190.3)       | -28.6 (-61.1 to 35.2)   | -37.1 (-70.9 to 50.5)     | -26.7 (-58.7 to 58.2)   |
|                   |                                      | YLDs                   | 5.3 (0.6 to 21.2)         | 4.6 (0.8 to 19)           | 5.8 (0.4 to 23.4)         | 5.9 (0.7 to 23.4)         | 4.9 (0.9 to 21)           | 6.5 (0.5 to 25.7)         | 10.9 (-35 to 91.6)      | 7.7 (-49.5 to 136.5)      | 12.1 (-29.8 to 112.5)   |
| Deaths            |                                      | 2.4 (0.6 to 5.2)       | 2.4 (0.6 to 5.3)          | 2.4 (0.5 to 5.1)          | 1.2 (0.3 to 2.7)          | 1.2 (0.3 to 2.7)          | 1.2 (0.3 to 2.6)          | -49.3 (-65.1 to -25.2)    | -50.4 (-69.2 to -20.5)  | -49 (-66.6 to -20.5)      |                         |
| DALYs             |                                      | 50.1 (10.8 to 108.9)   | 53.2 (11.3 to 120)        | 48.3 (10.4 to 103.9)      | 29.8 (6.9 to 66.9)        | 30.6 (6.9 to 69.9)        | 29.2 (6.8 to 64.2)        | -40.5 (-58 to -14.1)      | -42.4 (-60.6 to -14)    | -39.4 (-59.2 to -8.7)     |                         |
| Diet low in fiber | YLLs                                 | 44.9 (9.8 to 99.2)     | 46.8 (10 to 105.9)        | 43.9 (9.5 to 95.4)        | 25.2 (5.8 to 57)          | 24.9 (5.5 to 57)          | 25.4 (5.9 to 57.1)        | -43.9 (-61.8 to -15.7)    | -46.8 (-65.7 to -16.2)  | -42.2 (-62.1 to -10.8)    |                         |
|                   | YLDs                                 | 5.2 (1 to 11.7)        | 6.4 (1.3 to 14.5)         | 4.3 (0.9 to 9.6)          | 4.6 (1 to 10.5)           | 5.8 (1.3 to 13.5)         | 3.8 (0.9 to 8.9)          | -11.1 (-27.2 to 8.3)      | -9.8 (-30 to 15.9)      | -11.7 (-32.9 to 14.1)     |                         |
| Diet low in fiber | Deaths                               | 5.3 (2.5 to 8.7)       | 5.6 (2.7 to 9.5)          | 5 (2.4 to 8.3)            | 4.4 (1.9 to 7.7)          | 4.5 (2 to 7.9)            | 4.3 (1.9 to 7.5)          | -16.1 (-43 to 20.6)       | -19.8 (-48.5 to 20.9)   | -13.7 (-41.9 to 27.1)     |                         |

| Location                                 | Risk factor | Measure | 1990                      |                           |                          | 2019                     |                          |                          | % Change (1990 to 2019) |                        |                        |
|------------------------------------------|-------------|---------|---------------------------|---------------------------|--------------------------|--------------------------|--------------------------|--------------------------|-------------------------|------------------------|------------------------|
|                                          |             |         | Both                      | Female                    | Male                     | Both                     | Female                   | Male                     | Both                    | Female                 | Male                   |
| Fruits                                   | DALYs       |         | 125.9 (60 to 206.2)       | 142.4 (68 to 242.2)       | 115.3 (54.8 to 191.6)    | 116.7 (51.3 to 200.3)    | 124.4 (55.5 to 214.8)    | 111.5 (48.7 to 195.1)    | -7.3 (-38.1 to 36.2)    | -12.6 (-41.4 to 29)    | -3.3 (-36.1 to 45.3)   |
|                                          |             | YLLs    | 113.9 (53.8 to 188.5)     | 126.8 (60.4 to 215.7)     | 105.6 (49.9 to 177)      | 100 (44.4 to 175.2)      | 102.8 (46 to 176.8)      | 98 (43.2 to 172.5)       | -12.2 (-43.1 to 31.2)   | -18.9 (-48.9 to 24.5)  | -7.2 (-40.7 to 43.6)   |
|                                          |             | YLDs    | 12 (4.8 to 21.6)          | 15.6 (6.3 to 28.4)        | 9.6 (3.9 to 17.3)        | 16.7 (6.4 to 30.5)       | 21.6 (8.3 to 39.8)       | 13.4 (5.1 to 24.3)       | 38.6 (12.2 to 73)       | 38.3 (9.9 to 78.8)     | 39.6 (10.5 to 77.3)    |
| Diet low in vegetables                   | Deaths      |         | 3.1 (0.9 to 6)            | 3.1 (0.9 to 6.2)          | 3.2 (0.9 to 6.1)         | 2.2 (0.7 to 4.2)         | 2.2 (0.6 to 4.1)         | 2.3 (0.7 to 4.2)         | -28.5 (-49.6 to 2.1)    | -29.8 (-53.7 to 7.6)   | -28.2 (-49.5 to 2.8)   |
|                                          |             | DALYs   | 65.8 (17 to 138.3)        | 67.2 (16.4 to 145.6)      | 65 (16.3 to 137.5)       | 55.3 (15.9 to 106.5)     | 55.5 (15.3 to 108)       | 55.2 (15.4 to 105.7)     | -15.9 (-41.9 to 24.6)   | -17.5 (-44.3 to 27.8)  | -15 (-42 to 28)        |
|                                          |             | YLLs    | 59.6 (15.1 to 125.3)      | 59.8 (14.2 to 132.7)      | 59.7 (14.9 to 128.9)     | 47.5 (13.1 to 92.1)      | 45.8 (12.3 to 91.6)      | 48.6 (13.7 to 93.7)      | -20.3 (-46.5 to 21.9)   | -23.5 (-50.9 to 23.6)  | -18.6 (-46.1 to 26.1)  |
| Diet low in whole grains                 | YLDs        |         | 6.1 (1.5 to 12.3)         | 7.4 (1.6 to 15)           | 5.2 (1.3 to 10.4)        | 7.8 (2 to 14.8)          | 9.7 (2.4 to 18.5)        | 6.6 (1.7 to 12.5)        | 27.5 (6.2 to 61.6)      | 30.5 (6 to 73)         | 26.1 (3.3 to 65)       |
|                                          |             | Deaths  | 4.1 (1.1 to 6.4)          | 4.2 (1.1 to 6.6)          | 4 (1 to 6.4)             | 3.2 (0.8 to 4.9)         | 3.2 (0.8 to 5)           | 3.2 (0.8 to 4.9)         | -22 (-42.9 to 3.1)      | -22.8 (-46.7 to 7.2)   | -21.7 (-43 to 4.8)     |
|                                          |             | DALYs   | 84.6 (21.7 to 132.5)      | 89.6 (23 to 140.5)        | 81.1 (20.4 to 129.1)     | 73.3 (18.1 to 113.5)     | 76.7 (19.3 to 120.1)     | 70.8 (17.4 to 110.5)     | -13.4 (-35.1 to 12.4)   | -14.4 (-37.4 to 14.3)  | -12.6 (-36.7 to 14.5)  |
| High body-mass index                     | YLLs        |         | 72.5 (18.5 to 116.6)      | 74.2 (19.5 to 121.1)      | 71.3 (17.3 to 116.7)     | 59.5 (14.9 to 94.1)      | 58.9 (14.4 to 94.1)      | 59.7 (14.8 to 94.3)      | -18 (-42.4 to 11.3)     | -20.6 (-46.3 to 12.4)  | -16.3 (-42.2 to 14.4)  |
|                                          |             | YLDs    | 12.1 (3 to 20.1)          | 15.5 (3.8 to 26.2)        | 9.7 (2.4 to 16.1)        | 13.8 (3.4 to 22.3)       | 17.8 (4.4 to 29.1)       | 11.1 (2.6 to 18.1)       | 14.3 (1.3 to 27.2)      | 15.3 (-1.5 to 32.2)    | 14.5 (1 to 29)         |
|                                          |             | Deaths  | 29.2 (17.2 to 44.1)       | 35.5 (21.4 to 52.8)       | 24.7 (13.3 to 38.8)      | 30.3 (19.7 to 42)        | 32.6 (21.2 to 45.6)      | 28.6 (17.4 to 39.8)      | 3.8 (-27.5 to 55.8)     | -8 (-38.4 to 40.8)     | 16.1 (-23.5 to 85.7)   |
| High fasting plasma glucose              | DALYs       |         | 871.5 (540.4 to 1259.6)   | 1093.5 (695.6 to 1584.3)  | 724.5 (417 to 1090.5)    | 921.9 (636.9 to 1223.3)  | 1023 (726.4 to 1345.5)   | 855.8 (562.5 to 1167.6)  | 5.8 (-24.5 to 55.6)     | -6.4 (-33.1 to 37)     | 18.1 (-19.2 to 87.4)   |
|                                          |             | YLLs    | 783.3 (474.7 to 1161)     | 968.2 (596.7 to 1430.6)   | 660.7 (372.5 to 1023.6)  | 784 (522.3 to 1062.8)    | 838.4 (567.3 to 1128.4)  | 748.3 (476.2 to 1028.1)  | 0.1 (-31.2 to 54.8)     | -13.4 (-41.7 to 35.2)  | 13.3 (-25.9 to 84.3)   |
|                                          |             | YLDs    | 88.3 (53.8 to 131.1)      | 125.3 (77.4 to 181)       | 63.7 (37.3 to 97.1)      | 137.9 (90.1 to 190.3)    | 184.6 (122.8 to 250.2)   | 107.5 (68.8 to 149.2)    | 56.2 (34.6 to 90.7)     | 47.3 (26.7 to 77.3)    | 68.6 (38.5 to 120.4)   |
| High LDL cholesterol                     | Deaths      |         | 36.5 (21.2 to 62.7)       | 34.8 (19.2 to 64.4)       | 37.9 (21.4 to 65.5)      | 30.4 (18.7 to 50.8)      | 30.2 (17.7 to 52.8)      | 30.2 (18.3 to 49.5)      | -16.7 (-43 to 22.1)     | -13 (-45.3 to 41.1)    | -20.4 (-46.8 to 22.9)  |
|                                          |             | DALYs   | 668.9 (416.1 to 1065.5)   | 646.4 (386.7 to 1070.7)   | 686.7 (412.1 to 1089.4)  | 631.4 (410.5 to 929.6)   | 631 (398.7 to 958.1)     | 629.3 (391 to 933.6)     | -5.6 (-34.8 to 38.4)    | -2.4 (-37.6 to 51.6)   | -8.4 (-39.5 to 41.8)   |
|                                          |             | YLLs    | 611.4 (373.3 to 976.8)    | 580.2 (340.1 to 967)      | 635.9 (375.8 to 1019.4)  | 546.7 (346.4 to 802.5)   | 526.6 (325.7 to 801.2)   | 557.8 (340.5 to 840.2)   | -10.6 (-39.7 to 33.8)   | -9.2 (-43.4 to 44.9)   | -12.3 (-43.2 to 38.7)  |
| High systolic blood pressure             | YLDs        |         | 57.5 (33 to 95.2)         | 66.2 (37 to 113.7)        | 50.8 (28.5 to 86.9)      | 84.7 (50.5 to 127.9)     | 104.4 (62.6 to 168.1)    | 71.5 (41.8 to 109.3)     | 47.3 (14.4 to 89.9)     | 57.8 (13.7 to 116.9)   | 40.8 (3 to 93.1)       |
|                                          |             | Deaths  | 13.9 (4.7 to 31.3)        | 13.9 (4.7 to 31.2)        | 13.8 (4.7 to 30.9)       | 13.8 (5.3 to 29)         | 14.2 (5.1 to 30.2)       | 13.3 (5 to 28.2)         | -0.6 (-27.2 to 39.4)    | 2.3 (-27.2 to 52.1)    | -3.6 (-29.7 to 38.3)   |
|                                          |             | DALYs   | 282 (145.1 to 506.7)      | 294.9 (152 to 528.4)      | 273.2 (138.2 to 496.2)   | 310.6 (174.2 to 522.4)   | 329.7 (184.3 to 545.5)   | 296.7 (163.6 to 504.8)   | 10.2 (-18 to 52.2)      | 11.8 (-18.2 to 57.3)   | 8.6 (-20.2 to 52.6)    |
| High temperature                         | YLLs        |         | 241.3 (117.4 to 455.4)    | 243.2 (119.7 to 461)      | 240 (113.9 to 450.7)     | 252.1 (135.7 to 439.7)   | 253.4 (134.1 to 443.1)   | 250 (129.9 to 432.1)     | 4.5 (-26.5 to 53)       | 4.2 (-29.6 to 57.3)    | 4.2 (-29.1 to 54.1)    |
|                                          |             | YLDs    | 40.7 (22.5 to 68.9)       | 51.7 (28.2 to 90)         | 33.2 (18.6 to 56.3)      | 58.5 (34.8 to 96)        | 76.3 (45.3 to 123.9)     | 46.6 (27.5 to 75.9)      | 43.8 (26.4 to 65.8)     | 47.6 (24.6 to 75.3)    | 40.7 (23.3 to 64.2)    |
|                                          |             | Deaths  | 70.8 (50.8 to 93.4)       | 71 (48.7 to 97.3)         | 70.8 (47.4 to 95.2)      | 51.8 (37.5 to 65.5)      | 48.2 (33.7 to 64.8)      | 53.8 (36.2 to 67.8)      | -26.8 (-46.5 to 0.2)    | -32.2 (-54.9 to 0.9)   | -23.9 (-45 to 7.9)     |
| Household air pollution from solid fuels | DALYs       |         | 1499.7 (1105.4 to 1956.7) | 1552.8 (1124.1 to 2088.8) | 1467 (1016.2 to 1940.5)  | 1131.9 (852.2 to 1403.6) | 1060.5 (778.5 to 1365.4) | 1174.3 (842.9 to 1447.1) | -24.5 (-44.5 to 3.1)    | -31.7 (-53 to -3.5)    | -20 (-42.9 to 13.4)    |
|                                          |             | YLLs    | 1366.2 (976.8 to 1810.3)  | 1390.6 (980.5 to 1900.8)  | 1354.2 (912.3 to 1814.6) | 981.6 (714.7 to 1225.7)  | 887 (631.4 to 1175.1)    | 1039.9 (715.5 to 1306.2) | -28.2 (-49.1 to 1.2)    | -36.2 (-57.5 to -5.8)  | -23.2 (-46.8 to 11.8)  |
|                                          |             | YLDs    | 133.4 (91.7 to 180.5)     | 162.3 (109.6 to 224.1)    | 112.8 (77.7 to 153.7)    | 150.3 (106.6 to 197.8)   | 173.5 (119.3 to 233.2)   | 134.4 (92.9 to 177.9)    | 12.6 (-1 to 28.3)       | 6.9 (-14.3 to 33.9)    | 19.1 (3.3 to 39.4)     |
| Kidney dysfunction                       | Deaths      |         | 4.9 (0.5 to 10.9)         | 5.1 (0.5 to 11)           | 4.9 (0.5 to 10.8)        | 4.2 (1.5 to 7.8)         | 4.2 (1.5 to 7.6)         | 4.1 (1.4 to 7.8)         | -15.3 (-56.4 to 41.1)   | -16.2 (-60.2 to 44.4)  | -15.1 (-58.8 to 38.1)  |
|                                          |             | YLLs    | 87.9 (8.9 to 189.9)       | 91.4 (8.6 to 198)         | 85.5 (8.4 to 187.1)      | 74.1 (26.3 to 139.7)     | 74.1 (26.4 to 137.8)     | 73.8 (25.8 to 139.5)     | -15.7 (-58 to 46.5)     | -19 (-63 to 40.4)      | -13.7 (-60.3 to 48.6)  |
|                                          |             | YLDs    | 50.1 (25.7 to 79.5)       | 69.2 (37.2 to 108)        | 36.7 (17.6 to 61.1)      | 0.2 (0.1 to 0.7)         | 0.4 (0.1 to 1)           | 0.2 (0 to 0.4)           | -99.5 (-99.9 to -98.6)  | -99.5 (-99.9 to -98.4) | -99.6 (-99.9 to -98.7) |
| Lead exposure                            | Deaths      |         | 13.1 (8.9 to 17.9)        | 14.9 (9.9 to 20.8)        | 11.6 (7.6 to 15.9)       | 12.9 (8.3 to 17.3)       | 13.2 (8.2 to 18.6)       | 12.6 (8 to 17.1)         | -1.7 (-29.5 to 31.7)    | -11.3 (-39.3 to 25.8)  | 8.3 (-21.5 to 49.4)    |
|                                          |             | DALYs   | 272.7 (199.1 to 356.4)    | 321.4 (230.4 to 427.6)    | 237.3 (164.2 to 316.2)   | 285.8 (208 to 363.4)     | 308.7 (225.3 to 403.1)   | 270.5 (188.7 to 344.3)   | 4.8 (-21.4 to 39.7)     | -3.9 (-30.3 to 31.2)   | 14 (-15.4 to 54.4)     |
|                                          |             | YLLs    | 246.5 (175.3 to 328.8)    | 285.2 (197.4 to 387.4)    | 218.4 (146.3 to 294.7)   | 244.4 (171.4 to 315.7)   | 253.4 (174.7 to 337)     | 238.1 (159.9 to 304.8)   | -0.9 (-28.6 to 37.1)    | -11.1 (-38.7 to 27.8)  | 9 (-22.1 to 52.5)      |
| Low physical activity                    | YLDs        |         | 26.1 (17.7 to 36.2)       | 36.2 (24.3 to 50.8)       | 18.9 (12.9 to 25.9)      | 41.4 (28.5 to 55.6)      | 55.4 (38.4 to 74.7)      | 32.4 (22.1 to 43.8)      | 58.5 (41.8 to 76.3)     | 52.9 (32.9 to 74.1)    | 70.9 (50.6 to 93.4)    |
|                                          |             | Deaths  | 7.2 (4 to 10.9)           | 5.3 (2.3 to 8.8)          | 8.8 (5.1 to 13)          | 4.2 (2.2 to 6.6)         | 2.9 (1.1 to 5.2)         | 5.1 (2.8 to 7.6)         | -41.9 (-58.4 to -20.8)  | -45 (-63.3 to -23.8)   | -41.9 (-58.2 to -18)   |
|                                          |             | DALYs   | 159 (88.4 to 241.1)       | 117 (48.8 to 194.4)       | 189.6 (112.1 to 282.1)   | 82.9 (40 to 132.5)       | 56.8 (18.3 to 104.5)     | 100.4 (52.2 to 151)      | -47.8 (-64.1 to -28.8)  | -51.4 (-69.5 to -33.6) | -47.1 (-63.8 to -25.4) |
| Low temperature                          | YLLs        |         | 145.2 (80 to 221.1)       | 104.7 (44 to 177.2)       | 174.9 (101.2 to 264.7)   | 72.8 (35.1 to 116.3)     | 47.9 (15.4 to 87.9)      | 89.5 (46.4 to 136.7)     | -49.9 (-66.3 to -29)    | -54.3 (-72.2 to -35.3) | -48.8 (-65.5 to -26.1) |
|                                          |             | YLDs    | 13.7 (7.1 to 21.5)        | 12.2 (4.5 to 21.7)        | 14.7 (8.5 to 22.4)       | 10.1 (4.3 to 17.4)       | 8.9 (2.5 to 17.3)        | 10.9 (5.3 to 17.6)       | -26.4 (-42.6 to -14.6)  | -27.1 (-49.2 to -13)   | -26.3 (-41.6 to -13.9) |
|                                          |             | Deaths  | 10.2 (2.6 to 19.6)        | 11.1 (3 to 20.4)          | 9.4 (2.1 to 19.1)        | 9.2 (2.6 to 16.5)        | 10.1 (3.1 to 18.1)       | 8.4 (2.1 to 15.1)        | -9.8 (-34 to 32.2)      | -8.4 (-36 to 41.2)     | -10 (-34.8 to 39.5)    |
| Secondhand smoke                         | DALYs       |         | 156.3 (36.4 to 316.3)     | 177.6 (44.9 to 347.8)     | 139.4 (27.7 to 295.5)    | 159.9 (40.9 to 298.4)    | 188.2 (52.7 to 336.9)    | 140.4 (31.8 to 270.1)    | 2.3 (-24.2 to 50.2)     | 6 (-24.6 to 60.5)      | 0.7 (-28.2 to 52.1)    |
|                                          |             | YLLs    | 138.1 (32.6 to 280.2)     | 152.6 (39.2 to 302.1)     | 126.2 (25.5 to 271.3)    | 133.3 (33.7 to 246.3)    | 149.7 (41 to 271.8)      | 121.7 (27.4 to 233.5)    | -3.5 (-30.9 to 43.8)    | -1.9 (-33.5 to 55.6)   | -3.6 (-31.7 to 46.6)   |
|                                          |             | YLDs    | 18.2 (3.6 to 40.7)        | 25 (5.3 to 54.1)          | 13.1 (2.2 to 30.8)       | 26.7 (5.9 to 53.3)       | 38.5 (9.6 to 72.7)       | 18.7 (3.4 to 40.4)       | 46.2 (18.3 to 108.5)    | 54.2 (21.9 to 127.1)   | 42.6 (13.3 to 109.3)   |
| Low temperature                          | Deaths      |         | 6 (0 to 12.3)             | 6.1 (0 to 12.6)           | 5.9 (0 to 12.2)          | 3.7 (-0.3 to 8)          | 3.8 (-0.3 to 8.3)        | 3.7 (-0.3 to 7.9)        | -37.1 (-73.4 to 2)      | -37.6 (-74.8 to 7.1)   | -37.1 (-73.7 to 2.7)   |
|                                          |             | YLLs    | 105.7 (0.3 to 221.2)      | 109.6 (0.3 to 227.4)      | 103.2 (0.3 to 217.6)     | 66.3 (-4.6 to 142.4)     | 66.2 (-4.9 to 145)       | 66.1 (-4.5 to 143)       | -37.3 (-73.4 to 7.3)    | -39.6 (-76.1 to 5.8)   | -36 (-73.6 to 6.3)     |
| Secondhand smoke                         | Deaths      |         | 5.2 (3.5 to 7.1)          | 5.8 (4 to 8.1)            | 4.8 (3.1 to 6.8)         | 3.5 (2.4 to 4.6)         | 4.1 (2.9 to 5.7)         | 3 (2 to 4.1)             | -33.4 (-52.3 to -6.9)   | -29.5 (-51.8 to 2.3)   | -37.5 (-55.8 to -9.5)  |
|                                          |             | DALYs   | 123.1 (82.2 to 169.2)     | 152.8 (102.4 to 213.3)    | 105.1 (67.3 to 149.5)    | 86.4 (59.2 to 115.7)     | 112.3 (78.7 to 152.8)    | 69.7 (45.3 to 95.6)      | -29.8 (-49.7 to -0.8)   | -26.5 (-48.8 to 5.8)   | -33.7 (-53.6 to -3.6)  |

| Location                    | Risk factor                          | Measure                 | 1990                      |                           |                           | 2019                      |                           |                           | % Change (1990 to 2019)  |                         |                          |
|-----------------------------|--------------------------------------|-------------------------|---------------------------|---------------------------|---------------------------|---------------------------|---------------------------|---------------------------|--------------------------|-------------------------|--------------------------|
|                             |                                      |                         | Both                      | Female                    | Male                      | Both                      | Female                    | Male                      | Both                     | Female                  | Male                     |
|                             | Smoking                              | YLLs                    | 115.7 (76.1 to 161.5)     | 141.9 (93.8 to 201.4)     | 100 (63.2 to 143.3)       | 78.3 (52.6 to 106.4)      | 99.4 (67.7 to 138)        | 64.6 (41.6 to 89.1)       | -32.3 (-52.8 to -2.1)    | -29.9 (-52.6 to 3.9)    | -35.4 (-55.4 to -4.3)    |
|                             |                                      | YLDs                    | 7.4 (4.8 to 10.4)         | 10.9 (7.1 to 15.5)        | 5.1 (3.3 to 7.2)          | 8.1 (5.3 to 11.1)         | 12.8 (8.2 to 17.8)        | 5.1 (3.3 to 7.2)          | 10.2 (-2.7 to 24.5)      | 17.6 (2.3 to 34.7)      | -0.7 (-17.4 to 19.1)     |
|                             |                                      | Deaths                  | 10.8 (7.8 to 14.9)        | 3.7 (2.3 to 5.8)          | 16.1 (11.2 to 22.2)       | 8.2 (5.8 to 10.3)         | 2.2 (1.5 to 3.2)          | 12.1 (8.5 to 15)          | -24.6 (-48.4 to 11)      | -39.3 (-66.8 to 7.6)    | -24.9 (-48.2 to 10.6)    |
|                             |                                      | DALYs                   | 302.1 (218.7 to 420.8)    | 103.5 (64.7 to 164.1)     | 437 (307.3 to 603.7)      | 242.5 (174.3 to 305.2)    | 65.6 (43.5 to 94.4)       | 357.3 (255.2 to 454.1)    | -19.7 (-44.4 to 19)      | -36.6 (-63.7 to 8.1)    | -18.3 (-43.4 to 20.2)    |
|                             |                                      | YLLs                    | 275 (195 to 391)          | 91.9 (56.4 to 150.2)      | 399.7 (275.1 to 566.8)    | 211.1 (146.9 to 270.3)    | 54 (35.1 to 80.1)         | 313.1 (216.5 to 403.2)    | -23.2 (-48.6 to 17.6)    | -41.2 (-67.8 to 4.9)    | -21.7 (-47.4 to 20.1)    |
|                             |                                      | YLDs                    | 27.1 (18.6 to 36.6)       | 11.6 (6.6 to 18.2)        | 37.4 (26 to 50.7)         | 31.4 (22.4 to 41.4)       | 11.6 (7.3 to 17.1)        | 44.2 (31.4 to 58.2)       | 15.8 (-4.5 to 40.8)      | 0 (-35.4 to 57.2)       | 18.3 (-0.9 to 40.7)      |
| Suppl                       | All risk factors                     | Deaths                  | 152.8 (107.9 to 199.6)    | 158.9 (106.7 to 204.1)    | 146.6 (102.7 to 208.9)    | 111.2 (81.4 to 157.5)     | 119.3 (84.1 to 160.8)     | 104.2 (71.4 to 162)       | -27.2 (-40.6 to -8.8)    | -24.9 (-38.6 to -6.2)   | -28.9 (-44.5 to -7.8)    |
|                             |                                      | DALYs                   | 3265.7 (2409.1 to 4278.2) | 3465.8 (2476.4 to 4432.1) | 3072.2 (2180.6 to 4359.6) | 2309.3 (1736.6 to 3195.8) | 2498.4 (1829.2 to 3293.7) | 2147.4 (1506.8 to 3305.8) | -29.3 (-43.2 to -11.8)   | -27.9 (-41.6 to -9)     | -30.1 (-45.9 to -9.3)    |
|                             |                                      | YLLs                    | 3041.3 (2172.1 to 4025.6) | 3194.1 (2187.2 to 4159.9) | 2891.9 (2003.6 to 4154.9) | 2059.5 (1500.5 to 2954)   | 2189.5 (1506.8 to 2942.5) | 1948.3 (1308.6 to 3083.6) | -32.3 (-46.9 to -13.5)   | -31.5 (-45.8 to -11.8)  | -32.6 (-49.4 to -10.8)   |
|                             |                                      | YLDs                    | 224.4 (162.3 to 284.5)    | 271.7 (196.7 to 346.8)    | 180.2 (129.3 to 229.8)    | 249.8 (182.7 to 318.7)    | 308.9 (224.6 to 395.9)    | 199.1 (143.4 to 252.7)    | 11.4 (5.3 to 17.4)       | 13.7 (5.8 to 21.7)      | 10.5 (2.4 to 18.7)       |
|                             | Alcohol use                          | Deaths                  | 1.1 (0.3 to 2.3)          | 0.3 (-0.1 to 0.8)         | 2 (0.6 to 3.8)            | 0 (-0.1 to 0)             | 0 (-0.1 to 0)             | 0 (-0.1 to 0.1)           | -102.2 (-112.8 to -98.4) | -110.6 (-222.1 to 22)   | -101.2 (-110 to -97.2)   |
|                             |                                      | DALYs                   | 34.6 (9.9 to 65.5)        | 8.5 (-1.1 to 21.5)        | 59 (18.9 to 113.1)        | -0.5 (-1.8 to 0.6)        | -0.6 (-1.2 to 0)          | -0.5 (-2.7 to 1.7)        | -101.5 (-109 to -98.2)   | -107 (-197.9 to -16)    | -100.8 (-107.1 to -97.2) |
|                             |                                      | YLLs                    | 33.1 (9.5 to 63.1)        | 8.3 (-0.6 to 20.7)        | 56.4 (17.9 to 109)        | -0.4 (-1.5 to 0.6)        | -0.5 (-1 to 0)            | -0.3 (-2.4 to 1.6)        | -101.3 (-107.9 to -98.2) | -105.9 (-164.5 to 0.1)  | -100.6 (-106.3 to -97.4) |
|                             |                                      | YLDs                    | 1.5 (0.2 to 3)            | 0.2 (-0.4 to 1)           | 2.7 (0.7 to 5)            | -0.1 (-0.3 to 0)          | -0.1 (-0.2 to 0)          | -0.1 (-0.4 to 0.2)        | -107.4 (-146.4 to -96.9) | -153 (-569.4 to 358.7)  | -104.2 (-130.2 to -94.4) |
|                             | Ambient particulate matter pollution | Deaths                  | 7.9 (2.6 to 17.6)         | 6.8 (2.2 to 15.9)         | 9 (2.7 to 20.5)           | 24 (13.4 to 38.7)         | 23.4 (12.4 to 37.7)       | 24.5 (13 to 43.6)         | 203 (60.9 to 572.6)      | 243.9 (84.8 to 661.5)   | 172.8 (39.2 to 515.8)    |
|                             |                                      | DALYs                   | 182 (59.4 to 403.4)       | 159.6 (52 to 372.3)       | 202.5 (61.7 to 467.1)     | 558.6 (317.3 to 894.1)    | 552.4 (304.5 to 873.8)    | 563.9 (313.9 to 977.5)    | 206.9 (59 to 596.3)      | 246.1 (82.6 to 691.4)   | 178.5 (39.7 to 553.4)    |
|                             |                                      | YLLs                    | 169.4 (55 to 378.6)       | 146.7 (46.9 to 342.4)     | 190.2 (58 to 439.4)       | 495.4 (275.2 to 822)      | 480.1 (260.2 to 776.2)    | 508.6 (273.3 to 902.2)    | 192.4 (49.8 to 577.4)    | 227.2 (71.2 to 655.7)   | 167.4 (32.3 to 532)      |
|                             |                                      | YLDs                    | 12.6 (4.1 to 28.9)        | 12.8 (4.2 to 30.1)        | 12.3 (3.9 to 27.7)        | 63.2 (33.9 to 97.4)       | 72.3 (37.5 to 113.6)      | 55.3 (30.6 to 82.8)       | 402.5 (167.5 to 1013.4)  | 462.6 (195.5 to 1148.5) | 349.2 (140 to 930)       |
|                             | Diet high in red meat                | Deaths                  | 4.7 (1.6 to 8.1)          | 4.9 (1.6 to 8.8)          | 4.5 (1.4 to 8)            | 3.2 (1.1 to 5.8)          | 3.4 (1.1 to 5.9)          | 3 (1 to 5.6)              | -32.2 (-58 to 10.5)      | -31.1 (-59.1 to 15.1)   | -32.8 (-59.5 to 14.4)    |
|                             |                                      | DALYs                   | 125.2 (39.4 to 213)       | 134.2 (41.8 to 237.2)     | 116.3 (34.1 to 209.5)     | 85.3 (29 to 150.8)        | 91.8 (30.3 to 159.8)      | 79.4 (26.1 to 147.6)      | -31.8 (-58.1 to 15.6)    | -31.6 (-60.2 to 21.4)   | -31.7 (-59.3 to 19.3)    |
|                             |                                      | YLLs                    | 115.9 (34.7 to 199.3)     | 123 (35.8 to 219.6)       | 108.8 (30.7 to 200.2)     | 74.9 (25.5 to 135.4)      | 79 (26 to 139.9)          | 71.1 (23.6 to 134.5)      | -35.4 (-60.9 to 13.5)    | -35.7 (-62.6 to 17.2)   | -34.7 (-61.3 to 17)      |
|                             |                                      | YLDs                    | 9.3 (3.2 to 15.7)         | 11.2 (3.7 to 19.2)        | 7.5 (2.5 to 12.6)         | 10.4 (2.9 to 17.8)        | 12.8 (3.5 to 22.4)        | 8.3 (2.3 to 14.6)         | 12.1 (-18.9 to 39.4)     | 14 (-20.8 to 52)        | 10.8 (-23.6 to 47.2)     |
|                             | Diet high in sodium                  | Deaths                  | 3.1 (0.4 to 13.5)         | 2.3 (0.5 to 10.1)         | 3.9 (0.3 to 17)           | 2.2 (0.3 to 9.1)          | 1.6 (0.3 to 6.7)          | 2.6 (0.2 to 11.5)         | -31.4 (-59.5 to 32.7)    | -31.5 (-67.8 to 47.6)   | -32.5 (-60.3 to 47)      |
|                             |                                      | DALYs                   | 76.6 (8.7 to 327.9)       | 57.4 (9.8 to 258.2)       | 94.3 (6.3 to 406.8)       | 51.6 (6.1 to 210.2)       | 38.1 (6.8 to 164.4)       | 63.4 (4.4 to 264.8)       | -32.7 (-62 to 30.1)      | -33.6 (-69.6 to 50.2)   | -32.7 (-58.1 to 44.9)    |
|                             |                                      | YLLs                    | 71.6 (7.9 to 309.7)       | 52.9 (9 to 238.5)         | 88.7 (5.9 to 385)         | 46.1 (5.4 to 190.2)       | 33.2 (6 to 141.9)         | 57.3 (3.9 to 244.1)       | -35.6 (-63.9 to 27.3)    | -37.2 (-71.6 to 43.2)   | -35.4 (-60.4 to 40.5)    |
|                             |                                      | YLDs                    | 5.1 (0.6 to 20.6)         | 4.5 (0.7 to 19.6)         | 5.6 (0.4 to 21.9)         | 5.6 (0.7 to 22.7)         | 4.9 (0.8 to 21.2)         | 6.2 (0.4 to 24.2)         | 9.3 (-38.3 to 98.7)      | 8.3 (-50.5 to 139.8)    | 9.9 (-28.1 to 119.9)     |
|                             | Diet low in fiber                    | Deaths                  | 7.9 (1.8 to 15.2)         | 8.2 (1.7 to 15.6)         | 7.6 (1.8 to 14.9)         | 4.3 (0.9 to 8.6)          | 4.6 (0.9 to 9.1)          | 4.1 (0.8 to 8.8)          | -45.5 (-61.5 to -27.5)   | -44.6 (-63.6 to -22.6)  | -46.1 (-64.8 to -22.4)   |
|                             |                                      | DALYs                   | 194.6 (41.6 to 372.4)     | 208.1 (43.5 to 403.1)     | 181.1 (40.7 to 356.2)     | 104.6 (20.7 to 206)       | 112.1 (22.2 to 222.4)     | 97.9 (19.1 to 204.6)      | -46.2 (-62.7 to -28.3)   | -46.1 (-65 to -25.2)    | -46 (-63.4 to -20.6)     |
|                             |                                      | YLLs                    | 179.9 (37.9 to 349)       | 190.5 (39.5 to 373.5)     | 169.3 (37.3 to 335.8)     | 92 (18 to 185.2)          | 96.7 (19.1 to 195.5)      | 87.7 (16.8 to 188.4)      | -48.9 (-65.4 to -29.7)   | -49.2 (-67.6 to -27.4)  | -48.2 (-65.8 to -22.6)   |
|                             |                                      | YLDs                    | 14.6 (3.3 to 27.1)        | 17.6 (4 to 33)            | 11.8 (2.8 to 21.9)        | 12.6 (2.6 to 23.9)        | 15.4 (3 to 29.4)          | 10.1 (2.2 to 19.8)        | -13.6 (-34.1 to 3)       | -12.6 (-39.6 to 11.3)   | -14.1 (-39.8 to 10.8)    |
|                             | Diet low in fruits                   | Deaths                  | 10.9 (5.3 to 19.5)        | 11.5 (5.6 to 20.1)        | 10.4 (4.8 to 19.6)        | 6 (2.5 to 11.2)           | 6.4 (2.7 to 11.7)         | 5.6 (2.2 to 11.6)         | -45.1 (-64.2 to -20.5)   | -44 (-64.8 to -16.5)    | -45.7 (-65.8 to -18.5)   |
|                             |                                      | DALYs                   | 279.6 (141 to 487.5)      | 302 (150.6 to 523.6)      | 257.7 (123.5 to 479.4)    | 153.1 (65.8 to 282.2)     | 166 (72.8 to 289.7)       | 141.7 (57.2 to 283.2)     | -45.2 (-64.5 to -19)     | -45 (-66.2 to -18.2)    | -45 (-65.2 to -16.4)     |
|                             |                                      | YLLs                    | 261.1 (128.2 to 459.4)    | 279.5 (136.8 to 493.1)    | 242.9 (116.8 to 457.2)    | 135.8 (58.7 to 259.9)     | 144.6 (64.5 to 263.2)     | 128 (51.8 to 262.9)       | -48 (-66.7 to -22.6)     | -48.3 (-68.2 to -20.9)  | -47.3 (-67.3 to -17.7)   |
|                             |                                      | YLDs                    | 18.5 (8.1 to 32.4)        | 22.5 (9.7 to 39)          | 14.8 (6.3 to 26.3)        | 17.3 (6.4 to 31.8)        | 21.4 (7.9 to 40)          | 13.6 (5.1 to 24.8)        | -6.6 (-29 to 9.4)        | -5 (-30.2 to 14.3)      | -7.6 (-32.5 to 11.7)     |
|                             | Diet low in vegetables               | Deaths                  | 7 (2.2 to 12.4)           | 7.2 (2.2 to 12.5)         | 6.9 (2.2 to 12.9)         | 3.6 (1.2 to 6.6)          | 3.7 (1.2 to 6.6)          | 3.4 (1.2 to 6.7)          | -49.5 (-68.6 to -19)     | -48.5 (-68.7 to -14.4)  | -50.2 (-69.4 to -19.9)   |
|                             |                                      | DALYs                   | 174.9 (50.6 to 312.4)     | 182.8 (50.5 to 326.2)     | 167 (49.1 to 315.8)       | 86.7 (28.7 to 162.7)      | 90.8 (28.4 to 165.8)      | 83.1 (27.1 to 165.4)      | -50.4 (-69.1 to -17.3)   | -50.3 (-70.3 to -14.2)  | -50.3 (-70.1 to -17.5)   |
|                             | YLLs                                 | 163.8 (45.6 to 298.2)   | 169.7 (45.1 to 308)       | 157.9 (45.5 to 300.5)     | 77.2 (25.5 to 146)        | 79.4 (25.2 to 145.8)      | 75.2 (24.8 to 152.9)      | -52.9 (-70.8 to -20.1)    | -53.2 (-72.6 to -16.3)   | -52.3 (-71.4 to -20)    |                          |
|                             | YLDs                                 | 11.1 (4 to 19.1)        | 13.1 (4.6 to 22.9)        | 9.1 (3.2 to 15.9)         | 9.5 (2.8 to 17.2)         | 11.5 (3.3 to 20.9)        | 7.8 (2.4 to 13.9)         | -13.9 (-41.2 to 8.9)      | -12.7 (-43 to 12.4)      | -14.4 (-42.1 to 9.4)    |                          |
| Diet low in whole grains    | Deaths                               | 7 (3.7 to 10.5)         | 7.4 (4 to 11)             | 6.5 (3.4 to 11)           | 7.4 (3.9 to 11.6)         | 8 (4.3 to 11.6)           | 6.8 (3.4 to 12.1)         | 5.4 (-16.1 to 32)         | 7 (-16.1 to 37.7)        | 4.8 (-23.8 to 39)       |                          |
|                             | DALYs                                | 138.7 (70 to 213.2)     | 151.1 (75.4 to 224.1)     | 126.8 (63.5 to 222.2)     | 154.9 (78.1 to 238.1)     | 170.4 (86.9 to 253.7)     | 141.2 (66.6 to 249.6)     | 11.6 (-11.4 to 41)        | 12.8 (-11.5 to 43.2)     | 11.3 (-18 to 50)        |                          |
|                             | YLLs                                 | 120.3 (60.3 to 188.1)   | 128.3 (63.7 to 197)       | 112.4 (55 to 202.5)       | 132.1 (66.1 to 212.8)     | 141.9 (70.7 to 215.3)     | 123.4 (57.2 to 229.7)     | 9.8 (-15.7 to 42.4)       | 10.6 (-17.2 to 46)       | 9.8 (-22.6 to 53.7)     |                          |
|                             | YLDs                                 | 18.5 (9.4 to 27.2)      | 22.8 (11.9 to 33.9)       | 14.4 (7 to 21.4)          | 22.8 (11.1 to 33.8)       | 28.5 (14.1 to 42.2)       | 17.8 (8.6 to 26.5)        | 23.4 (14.1 to 32)         | 24.9 (13.3 to 36.6)      | 23.5 (11.5 to 36.8)     |                          |
| High body-mass index        | Deaths                               | 22.8 (10.6 to 38.5)     | 29.9 (15.5 to 48.9)       | 16.3 (5.8 to 32.5)        | 25.4 (14.3 to 40.4)       | 29.7 (16.7 to 46)         | 21.9 (11 to 39.6)         | 11.6 (-20.9 to 75.9)      | -0.7 (-30.6 to 49.6)     | 34.5 (-12.8 to 166.2)   |                          |
|                             | DALYs                                | 732.5 (365.4 to 1197.7) | 970.2 (514.3 to 1520.3)   | 509.7 (190.5 to 993.3)    | 788.1 (470.6 to 1219.2)   | 924.7 (560.3 to 1368)     | 668.6 (345.9 to 1168.2)   | 7.6 (-24.6 to 73.4)       | -4.7 (-34.2 to 44.4)     | 31.2 (-14.5 to 163.1)   |                          |
|                             | YLLs                                 | 680.5 (333.8 to 1120.4) | 895.5 (466.7 to 1418.9)   | 478.9 (180.7 to 964.4)    | 692.4 (394.3 to 1115.8)   | 798.7 (462.3 to 1223)     | 600.1 (298.6 to 1085.3)   | 1.7 (-30.8 to 67.3)       | -10.8 (-39.9 to 39.7)    | 25.3 (-20.7 to 154.6)   |                          |
|                             | YLDs                                 | 52 (26 to 83.3)         | 74.7 (38.6 to 115.2)      | 30.8 (12.3 to 54.8)       | 95.6 (58.9 to 137.7)      | 126 (80.9 to 178.9)       | 68.5 (38.8 to 102.8)      | 83.9 (49.2 to 166.3)      | 68.8 (33.4 to 129.8)     | 122.8 (65.6 to 309.9)   |                          |
| High fasting plasma glucose | Deaths                               | 29 (15.6 to 53.4)       | 29.3 (14.8 to 55.6)       | 28.6 (14.9 to 54)         | 40.3 (21.4 to 74.9)       | 42.7 (22.1 to 79.2)       | 38.3 (19.9 to 71)         | 39.1 (-3.2 to 108.5)      | 45.6 (-3.3 to 120.8)     | 33.6 (-12.2 to 111)     |                          |
|                             | DALYs                                | 540.5 (314 to 925.8)    | 555.6 (313.8 to 972.7)    | 526 (298.2 to 921.7)      | 789.9 (460.5 to 1335.5)   | 841.9 (486.9 to 1443.1)   | 747 (416.1 to 1280.1)     | 46.2 (3.8 to 110.5)       | 51.5 (1.3 to 124.4)      | 42 (-5.3 to 113.3)      |                          |
|                             | YLLs                                 | 504.7 (290.6 to 866.4)  | 512.9 (284.5 to 899.9)    | 496.5 (275 to 877.2)      | 707.2 (403.4 to 1205.5)   | 740.6 (421.1 to 1280.8)   | 679.5 (376.7 to 1196.2)   | 40.1 (-1.2 to 104.6)      | 44.4 (-4.4 to 114.1)     | 36.9 (-10.2 to 107.7)   |                          |

| Location             | Risk factor                          | Measure                                  | 1990                      |                           |                           | 2019                      |                           |                           | % Change (1990 to 2019) |                         |                        |
|----------------------|--------------------------------------|------------------------------------------|---------------------------|---------------------------|---------------------------|---------------------------|---------------------------|---------------------------|-------------------------|-------------------------|------------------------|
|                      |                                      |                                          | Both                      | Female                    | Male                      | Both                      | Female                    | Male                      | Both                    | Female                  | Male                   |
|                      | High LDL cholesterol                 | YLDs                                     | 35.8 (20.1 to 61.4)       | 42.7 (23.6 to 75.3)       | 29.5 (15.8 to 51.3)       | 82.7 (45.1 to 136.3)      | 101.3 (54.3 to 170.4)     | 67.4 (37.1 to 112.6)      | 131 (81.8 to 197.7)     | 137.4 (77.2 to 219.4)   | 128.7 (66.6 to 206.1)  |
|                      |                                      | Deaths                                   | 13 (4.5 to 29.5)          | 14 (4.4 to 31.7)          | 12 (4 to 27.4)            | 15.6 (5.7 to 34.2)        | 17.1 (6.1 to 36.1)        | 14.3 (5.2 to 31.9)        | 20.2 (-4 to 58.5)       | 22.3 (-5.2 to 61.9)     | 19.4 (-11.5 to 63.7)   |
|                      |                                      | DALYs                                    | 272.8 (139 to 499.5)      | 301.9 (150.2 to 554.9)    | 244.6 (122.4 to 472.5)    | 351.2 (191.4 to 615.1)    | 391.5 (211 to 682.9)      | 315.1 (159.5 to 590.1)    | 28.8 (1.7 to 68.7)      | 29.7 (0.2 to 70.4)      | 28.8 (-4.7 to 78.7)    |
|                      |                                      | YLLs                                     | 233.2 (112.6 to 450)      | 252.6 (113.9 to 487.4)    | 214.2 (102.1 to 421.9)    | 295.8 (149.1 to 547.9)    | 321.7 (156.8 to 587.6)    | 272.6 (130.2 to 541.8)    | 26.9 (-4.5 to 75)       | 27.3 (-7.6 to 76.6)     | 27.2 (-10.5 to 84.6)   |
|                      | High systolic blood pressure         | YLDs                                     | 39.6 (23.3 to 66.2)       | 49.3 (29.1 to 82.3)       | 30.3 (17.7 to 50.6)       | 55.4 (33.8 to 89.4)       | 69.8 (42.3 to 113.6)      | 42.5 (25.9 to 67.6)       | 40 (29.1 to 52.3)       | 41.5 (28.2 to 57.4)     | 40.1 (25.7 to 58.1)    |
|                      |                                      | Deaths                                   | 95.8 (65.2 to 131.6)      | 105.8 (69.4 to 143)       | 86 (56.7 to 129.1)        | 73.4 (50.8 to 105.5)      | 83.3 (56 to 116.4)        | 65 (42.3 to 106.4)        | -23.4 (-39.3 to -1.1)   | -21.2 (-38.8 to 4.1)    | -24.4 (-44 to -0.3)    |
|                      |                                      | DALYs                                    | 2150.6 (1536.7 to 2919.8) | 2404.5 (1649.1 to 3249.9) | 1911.2 (1301.9 to 2779.7) | 1592.1 (1151.5 to 2261.1) | 1800.8 (1287.8 to 2426.3) | 1417.1 (945.5 to 2243.5)  | -26 (-41.5 to -4.4)     | -25.1 (-41.6 to -2.1)   | -25.9 (-44.3 to -1)    |
|                      |                                      | YLLs                                     | 2003.2 (1397.5 to 2766.7) | 2218.3 (1472.1 to 3049)   | 1799.6 (1195.7 to 2661.5) | 1417.8 (983.4 to 2096.3)  | 1577.7 (1077.4 to 2171.1) | 1284.1 (833.1 to 2129.1)  | -29.2 (-45.4 to -7)     | -28.9 (-45.8 to -5.1)   | -28.6 (-47.5 to -2.9)  |
|                      | High temperature                     | YLDs                                     | 147.4 (105.8 to 192.6)    | 186.2 (130.3 to 242.7)    | 111.6 (78.9 to 147.8)     | 174.3 (125.3 to 228.3)    | 223 (159 to 293.6)        | 133 (94.6 to 172.9)       | 18.3 (7.1 to 30.8)      | 19.8 (5 to 38)          | 19.2 (4.9 to 35.7)     |
|                      |                                      | Deaths                                   | 6.6 (-1 to 16.1)          | 6.9 (-1 to 16)            | 6.4 (-1 to 15.9)          | 5.5 (1.9 to 12)           | 5.8 (2 to 12)             | 5.2 (1.9 to 11.7)         | -17.6 (-69.7 to 23.1)   | -15.2 (-69.6 to 27.9)   | -19.5 (-72.2 to 18.3)  |
|                      |                                      | YLLs                                     | 134.7 (-20.9 to 321.4)    | 142.4 (-21.4 to 334.2)    | 127.4 (-20.3 to 306.1)    | 101 (35.3 to 219.9)       | 107 (37.1 to 217.5)       | 95.8 (33.8 to 220)        | -25.1 (-74.3 to 11)     | -24.9 (-73.3 to 12.2)   | -24.8 (-76 to 14.3)    |
|                      |                                      | Household air pollution from solid fuels | Deaths                    | 65.4 (42.7 to 96.5)       | 70.8 (45.1 to 102.8)      | 60.2 (37.1 to 92.9)       | 16.2 (8.9 to 26.7)        | 19.5 (11.2 to 30.3)       | 13.5 (6.6 to 25.1)      | -75.2 (-84.5 to -62)    | -72.4 (-82.3 to -59.3) |
|                      | Kidney dysfunction                   | DALYs                                    | 1494.2 (1018.3 to 2095.6) | 1645.9 (1102.8 to 2251.3) | 1348.8 (864.2 to 2025.6)  | 380.3 (213.6 to 621.6)    | 461.4 (270.5 to 712.3)    | 310.2 (154.1 to 568)      | -74.5 (-84.5 to -61.4)  | -72 (-81.8 to -58.5)    | -77 (-87.4 to -63)     |
|                      |                                      | YLLs                                     | 1388 (915 to 1984.8)      | 1513.8 (979 to 2103.3)    | 1267 (790.9 to 1926.4)    | 336 (183.3 to 560)        | 401.2 (229.1 to 631.5)    | 279.9 (134.8 to 524.1)    | -75.8 (-85.4 to -63)    | -73.5 (-83.3 to -59.6)  | -77.9 (-88.1 to -63.7) |
|                      |                                      | YLDs                                     | 106.1 (71.1 to 145.9)     | 132.1 (88.3 to 182.1)     | 81.9 (54.1 to 113.9)      | 44.3 (25.4 to 68.2)       | 60.2 (36.1 to 89.7)       | 30.3 (15.7 to 49.9)       | -58.3 (-71.8 to -42.6)  | -54.4 (-68.4 to -38.3)  | -62.9 (-77.1 to -46.5) |
|                      |                                      | Deaths                                   | 11.8 (7.9 to 16.7)        | 13.3 (8.4 to 19.3)        | 10.3 (6.8 to 15.4)        | 12.2 (7.5 to 18.6)        | 13.6 (8.3 to 19.9)        | 11.1 (6.6 to 18.3)        | 3.6 (-19.7 to 32.8)     | 2 (-21.4 to 33.7)       | 7 (-21 to 43)          |
|                      | Lead exposure                        | DALYs                                    | 256.1 (181.2 to 349.8)    | 296.9 (203.4 to 414.5)    | 218.3 (148.1 to 320.1)    | 260.1 (182.5 to 369.4)    | 296.6 (201.3 to 407.7)    | 229.2 (153.5 to 353.4)    | 1.6 (-18.7 to 26.9)     | -0.1 (-20.9 to 29.4)    | 5 (-21.3 to 36.3)      |
|                      |                                      | YLLs                                     | 236.4 (164.9 to 326.5)    | 271.1 (178 to 384.1)      | 204.1 (136.4 to 303.7)    | 230.2 (156.5 to 336.8)    | 257.7 (167 to 363)        | 206.9 (135.5 to 332.1)    | -2.6 (-24.3 to 24.7)    | -4.9 (-27.1 to 26)      | 1.3 (-26.1 to 35.9)    |
|                      |                                      | YLDs                                     | 19.7 (13.4 to 26.5)       | 25.9 (17.7 to 35.1)       | 14.2 (9.6 to 18.8)        | 29.9 (20.3 to 40.7)       | 38.9 (26.4 to 53)         | 22.3 (15.1 to 30.3)       | 51.6 (39.2 to 62.8)     | 50.4 (35.7 to 63.9)     | 57.6 (40.6 to 75.8)    |
|                      |                                      | Deaths                                   | 16.1 (10.3 to 24.3)       | 14 (8.3 to 20.8)          | 18 (11.3 to 28.4)         | 11.3 (7.1 to 17.4)        | 10 (5.8 to 15.3)          | 12.4 (7.6 to 20)          | -29.9 (-45.4 to -9.9)   | -28.6 (-44.3 to -7.2)   | -31.6 (-48.5 to -9.1)  |
|                      | Low physical activity                | DALYs                                    | 375.8 (243.7 to 547.6)    | 331.7 (200.7 to 486.7)    | 416.3 (263.3 to 635.7)    | 230.7 (144.7 to 348.1)    | 205.4 (123.8 to 303.5)    | 252.3 (155 to 402.5)      | -38.6 (-52.1 to -21.3)  | -38.1 (-51.8 to -20.2)  | -39.4 (-54.4 to -20.5) |
|                      |                                      | YLLs                                     | 350.9 (223.7 to 520.4)    | 306.3 (179.7 to 453.9)    | 392 (243.1 to 607.7)      | 207.2 (128.3 to 321.9)    | 180.9 (104.4 to 274.8)    | 229.6 (136.4 to 377)      | -41 (-54.7 to -23.1)    | -40.9 (-55 to -22.4)    | -41.4 (-57 to -21.1)   |
|                      |                                      | YLDs                                     | 24.9 (15.8 to 35.1)       | 25.5 (15.7 to 36.5)       | 24.3 (15.7 to 33.9)       | 23.6 (14.5 to 33.8)       | 24.6 (14.5 to 36.7)       | 22.7 (14.3 to 32)         | -5.2 (-14.7 to 3.3)     | -3.6 (-15.8 to 7.6)     | -6.3 (-17 to 5.3)      |
|                      |                                      | Deaths                                   | 10.7 (3 to 19.7)          | 12 (3.7 to 21.6)          | 9.5 (2.3 to 19)           | 11.7 (3.4 to 21.3)        | 13.4 (4 to 23.8)          | 10.2 (2.6 to 20.7)        | 9 (-11.5 to 35.3)       | 11.8 (-11.5 to 43.2)    | 7.5 (-20.2 to 41.7)    |
| Low temperature      | DALYs                                | 175.1 (45.8 to 335.7)                    | 207.2 (57.5 to 387.2)     | 145 (31.6 to 305.6)       | 203.9 (52.2 to 391.6)     | 246 (65 to 444)           | 167 (37.4 to 359)         | 16.4 (-5.1 to 43.8)       | 18.7 (-5.5 to 48.7)     | 15.2 (-13.9 to 50.6)    |                        |
|                      | YLLs                                 | 154.5 (41.1 to 298.5)                    | 179 (51.1 to 335.7)       | 131.7 (28.6 to 281.2)     | 176.7 (45.3 to 345.8)     | 208.3 (56.5 to 383.6)     | 149.1 (32.5 to 328.6)     | 14.4 (-9.1 to 45)         | 16.4 (-11.5 to 50.9)    | 13.3 (-18.1 to 52.6)    |                        |
|                      | YLDs                                 | 20.5 (4.5 to 42.2)                       | 28.3 (6.9 to 55.5)        | 13.3 (2.4 to 30.2)        | 27.1 (6 to 55)            | 37.7 (9.2 to 73.3)        | 17.8 (3.1 to 39.9)        | 32.1 (21.4 to 47.1)       | 33.4 (21.5 to 50.7)     | 34.1 (17.9 to 58.4)     |                        |
|                      | Deaths                               | 4.4 (-1.3 to 10.6)                       | 4.6 (-1.5 to 10.8)        | 4.3 (-1.2 to 10.4)        | 3.2 (-1.7 to 8.1)         | 3.4 (-1.9 to 8.6)         | 3 (-1.6 to 8)             | -27.4 (-120.4 to 41.1)    | -25.1 (-121.9 to 46.1)  | -29.3 (-119.3 to 39.6)  |                        |
| Secondhand smoke     | YLLs                                 | 89.9 (-27.9 to 212)                      | 94.8 (-30.9 to 220.7)     | 85.1 (-24.4 to 203.1)     | 59.2 (-32.7 to 151.3)     | 62.8 (-34.6 to 157.7)     | 56.1 (-29.9 to 146.8)     | -34.1 (-118.1 to 30.3)    | -33.7 (-118.8 to 34.8)  | -34.1 (-117.6 to 27.9)  |                        |
|                      | Deaths                               | 6 (4 to 8.5)                             | 6.5 (4.1 to 9.1)          | 5.5 (3.4 to 8.1)          | 3.6 (2.4 to 5.3)          | 4 (2.6 to 5.7)            | 3.3 (2 to 5.2)            | -39.8 (-52.6 to -21.8)    | -38.9 (-52.5 to -20.1)  | -40.3 (-55.6 to -19.6)  |                        |
|                      | DALYs                                | 151.7 (101 to 214.1)                     | 174.1 (111.6 to 246.7)    | 129.1 (82 to 193.5)       | 89.4 (59.9 to 131.4)      | 103.4 (67.8 to 149.9)     | 76.1 (46.7 to 124.1)      | -41.1 (-55.2 to -22.1)    | -40.6 (-55.2 to -20)    | -41 (-57.2 to -20.2)    |                        |
|                      | YLLs                                 | 145.1 (95.8 to 206.2)                    | 165.5 (103.5 to 234)      | 124.4 (77.8 to 188.8)     | 82.9 (54.5 to 122.8)      | 94.7 (60.1 to 140.4)      | 71.6 (42.8 to 118.4)      | -42.9 (-57.2 to -23.2)    | -42.8 (-57.7 to -21.4)  | -42.4 (-58.9 to -20.8)  |                        |
| Smoking              | YLDs                                 | 6.6 (4.4 to 9)                           | 8.6 (5.7 to 11.8)         | 4.7 (3.2 to 6.5)          | 6.5 (4.3 to 8.9)          | 8.7 (5.8 to 12)           | 4.5 (3 to 6.2)            | -1.7 (-10.9 to 8.6)       | 0.9 (-10.2 to 13.4)     | -4.2 (-17.9 to 12)      |                        |
|                      | Deaths                               | 18.1 (12.4 to 26.1)                      | 6.3 (3.7 to 9.8)          | 29.1 (19.5 to 42.6)       | 11.4 (7.7 to 16.8)        | 3.7 (2.3 to 5.9)          | 17.8 (11.8 to 27.1)       | -37.4 (-54.1 to -15.7)    | -40.6 (-63.3 to -2.9)   | -38.8 (-55.9 to -15.8)  |                        |
|                      | DALYs                                | 492.6 (345.6 to 700.5)                   | 180.9 (109.1 to 282.2)    | 779.9 (531.3 to 1106.6)   | 306.3 (210.2 to 445.3)    | 108.5 (66.8 to 169.7)     | 478.1 (320.7 to 718)      | -37.8 (-54.6 to -15.8)    | -40 (-63.6 to -1.1)     | -38.7 (-55.8 to -14.8)  |                        |
|                      | YLLs                                 | 459.6 (313.7 to 661.2)                   | 165.8 (96.4 to 260.3)     | 730.2 (484.1 to 1063.9)   | 272.9 (179.3 to 409.7)    | 93.4 (54.5 to 151.3)      | 428.5 (273.2 to 674.4)    | -40.6 (-58 to -17.6)      | -43.7 (-66.5 to -4.8)   | -41.3 (-59 to -15.8)    |                        |
| Syrian Arab Republic | All risk factors                     | YLDs                                     | 33.1 (23 to 44)           | 15.1 (9 to 23.3)          | 49.7 (34.9 to 65.5)       | 33.4 (23.1 to 43.8)       | 15.1 (9 to 22.7)          | 49.6 (34.6 to 64.7)       | 1 (-17.1 to 20)         | 0.1 (-37.7 to 60.3)     | -0.3 (-15.3 to 15.6)   |
|                      |                                      | Deaths                                   | 117.7 (94.7 to 144.7)     | 124.4 (98.7 to 154.2)     | 111.9 (87.6 to 143.7)     | 83.2 (64.5 to 105.4)      | 93.2 (73 to 115.3)        | 80.2 (60.1 to 106)        | -29.3 (-48.7 to -2.3)   | -25.1 (-44.9 to 3.2)    | -28.4 (-50 to 1.9)     |
|                      |                                      | DALYs                                    | 2608 (2128.1 to 3157.7)   | 2600.4 (2086.5 to 3184.6) | 2620.2 (2094.4 to 3255.5) | 1708.5 (1346 to 2186.7)   | 1718.4 (1375.9 to 2146.7) | 1759.1 (1353.2 to 2312.8) | -34.5 (-51.5 to -11)    | -33.9 (-50.3 to -10.4)  | -32.9 (-51.8 to -4.3)  |
|                      | Alcohol use                          | YLLs                                     | 2377.1 (1916.1 to 2927)   | 2338.6 (1827.8 to 2905.6) | 2417.5 (1882.3 to 3060.5) | 1505.9 (1154.5 to 1964)   | 1488 (1164 to 1909.9)     | 1582.9 (1185.3 to 2130.3) | -36.6 (-54.9 to -11)    | -36.4 (-53.9 to -10)    | -34.5 (-54.5 to -3.5)  |
|                      |                                      | YLDs                                     | 230.8 (168.5 to 291.3)    | 261.8 (190.7 to 330.8)    | 202.8 (147.3 to 255.7)    | 202.5 (148.9 to 257.4)    | 230.4 (169.7 to 292.3)    | 176.2 (128.5 to 225.1)    | -12.3 (-16.8 to -7.2)   | -12 (-18.1 to -4.6)     | -13.1 (-19.1 to -6.1)  |
|                      |                                      | Deaths                                   | 1.4 (0.9 to 2.1)          | 0.2 (0.1 to 0.4)          | 2.6 (1.6 to 3.8)          | 0.5 (0.2 to 0.9)          | 0 (0 to 0.1)              | 1 (0.4 to 1.7)            | -63.1 (-81.5 to -40.4)  | -79.6 (-115.6 to -52.5) | -62 (-80.1 to -38.7)   |
|                      |                                      | DALYs                                    | 42.4 (26.6 to 61)         | 6.6 (2.6 to 12)           | 75.7 (46.2 to 111.1)      | 14.7 (7.1 to 24.5)        | 1.4 (-0.1 to 3.4)         | 28.1 (14.1 to 46.7)       | -65.3 (-81 to -46)      | -79.2 (-104.6 to -57.5) | -62.8 (-79.3 to -42.1) |
|                      | Ambient particulate matter pollution | YLLs                                     | 40 (24.7 to 58.4)         | 6.2 (2.5 to 11.2)         | 71.4 (43.4 to 105.8)      | 13.7 (6.6 to 23.1)        | 1.3 (-0.1 to 3.2)         | 26.1 (13 to 43.9)         | -65.9 (-81.6 to -46.1)  | -79.2 (-101.3 to -58.3) | -63.5 (-80 to -42)     |
|                      |                                      | YLDs                                     | 2.4 (1.4 to 3.6)          | 0.4 (0.1 to 0.8)          | 4.3 (2.4 to 6.4)          | 1.1 (0.4 to 1.8)          | 0.1 (-0.1 to 0.3)         | 2.1 (0.9 to 3.5)          | -55.8 (-77.2 to -40.3)  | -78.8 (-184.5 to -44.4) | -51.6 (-72.8 to -36.4) |
|                      |                                      | Deaths                                   | 27.3 (19.2 to 37.3)       | 27.2 (18.8 to 37.8)       | 27.4 (19.3 to 37.8)       | 19.9 (14.1 to 26.8)       | 21.2 (15.2 to 28.2)       | 19.8 (13.9 to 27.6)       | -26.9 (-48.7 to 4.4)    | -22.2 (-44.7 to 14.6)   | -27.6 (-50.1 to 6.2)   |
|                      |                                      | DALYs                                    | 684.5 (484.5 to 918.3)    | 650.6 (449.1 to 887.8)    | 716.9 (510.4 to 968)      | 470.9 (340.7 to 628)      | 457.5 (333.8 to 609)      | 495.9 (354.4 to 673.3)    | -31.2 (-50.1 to -2.5)   | -29.7 (-49.9 to 1.8)    | -30.8 (-51.8 to -0.3)  |
|                      | Ambient particulate matter pollution | YLLs                                     | 620.9 (440.4 to 845.4)    | 580.8 (397.9 to 802.2)    | 659 (464.2 to 901)        | 410.9 (286.9 to 558.6)    | 389.6 (274.8 to 528.5)    | 443.6 (311.8 to 612.9)    | -33.8 (-54.2 to -3.3)   | -32.9 (-54.2 to 1.5)    | -32.7 (-54.4 to 0.4)   |
|                      |                                      | YLDs                                     | 63.6 (41.8 to 87.7)       | 69.9 (44.7 to 97.3)       | 57.9 (37.9 to 80)         | 60 (41 to 79)             | 67.9 (46.4 to 89.5)       | 52.3 (35.5 to 69.5)       | -5.6 (-18.1 to 14.2)    | -2.8 (-17.4 to 21.4)    | -9.8 (-21.5 to 8.2)    |

| Location                                 | Risk factor | Measure | 1990                      |                           |                           | 2019                     |                          |                         | % Change (1990 to 2019) |                        |                        |
|------------------------------------------|-------------|---------|---------------------------|---------------------------|---------------------------|--------------------------|--------------------------|-------------------------|-------------------------|------------------------|------------------------|
|                                          |             |         | Both                      | Female                    | Male                      | Both                     | Female                   | Male                    | Both                    | Female                 | Male                   |
| Diet high in red meat                    | Deaths      | Deaths  | 5.3 (1.9 to 8.3)          | 5.3 (1.9 to 8.5)          | 5.2 (1.9 to 8.3)          | 3 (1.1 to 4.9)           | 3.1 (1.1 to 5.2)         | 3 (1.1 to 5)            | -43.5 (-60.6 to -19)    | -41.5 (-61.1 to -13.1) | -42.1 (-60.5 to -12.3) |
|                                          |             | DALYs   | 148.6 (56.7 to 230.8)     | 143.1 (54.8 to 224.7)     | 154.1 (56.5 to 243.8)     | 78.1 (30.2 to 127.1)     | 74 (28.5 to 121.3)       | 84.1 (30.6 to 139.8)    | -47.5 (-62.3 to -26.3)  | -48.3 (-64.2 to -26.9) | -45.4 (-61.6 to -19.4) |
|                                          |             | YLLs    | 134.3 (48.6 to 212.3)     | 127.1 (48 to 203.4)       | 141.3 (51 to 226)         | 67.5 (24.5 to 111.9)     | 62.2 (23.6 to 105)       | 74.9 (26.4 to 125.8)    | -49.7 (-64.9 to -26.3)  | -51.1 (-67.4 to -27.1) | -47 (-64 to -18.5)     |
|                                          |             | YLDs    | 14.3 (5 to 23)            | 16 (5.5 to 25.8)          | 12.8 (4.5 to 20.5)        | 10.5 (3.3 to 17.2)       | 11.8 (3.6 to 19.7)       | 9.2 (3 to 15.2)         | -26.4 (-38.6 to -17.7)  | -26.1 (-38.9 to -15.5) | -27.8 (-40.6 to -16.7) |
| Diet high in sodium                      | Deaths      | Deaths  | 2.4 (0.4 to 9.9)          | 1.7 (0.4 to 7)            | 3.1 (0.3 to 12.4)         | 1.6 (0.2 to 6.8)         | 1.2 (0.3 to 4.8)         | 2.1 (0.2 to 8.8)        | -32.5 (-58.1 to 22.2)   | -32.6 (-65.6 to 38.6)  | -31.2 (-60.4 to 41.7)  |
|                                          |             | DALYs   | 61.7 (7.4 to 246.3)       | 41 (7.7 to 173.1)         | 80.8 (5.9 to 315.6)       | 39 (4.9 to 159.4)        | 25 (5.1 to 107.4)        | 53.3 (3.9 to 215)       | -36.9 (-61.4 to 12.4)   | -38.9 (-69.2 to 35.1)  | -34.1 (-60.5 to 31.4)  |
|                                          |             | YLLs    | 56.4 (6.7 to 224.3)       | 36.7 (6.9 to 151.7)       | 74.5 (5.4 to 292.3)       | 34.5 (4.3 to 141.2)      | 21.5 (4.3 to 93.1)       | 47.9 (3.5 to 196.1)     | -38.8 (-63.2 to 10.7)   | -41.5 (-70.8 to 28.6)  | -35.7 (-62.5 to 30.6)  |
|                                          |             | YLDs    | 5.3 (0.6 to 21.5)         | 4.3 (0.7 to 18.6)         | 6.3 (0.4 to 25.3)         | 4.5 (0.5 to 17.9)        | 3.6 (0.6 to 15.1)        | 5.4 (0.4 to 21)         | -16.2 (-48.3 to 49.8)   | -16.4 (-61.6 to 83.9)  | -14.6 (-43 to 66.3)    |
| Diet low in fiber                        | Deaths      | Deaths  | 3.9 (0.8 to 7.7)          | 4 (0.8 to 8)              | 3.8 (0.8 to 7.6)          | 2.7 (0.6 to 5.5)         | 3 (0.6 to 6.1)           | 2.7 (0.6 to 5.5)        | -29.3 (-49.4 to 0)      | -24.3 (-49.9 to 12.6)  | -28.5 (-50.8 to 5)     |
|                                          |             | DALYs   | 98.1 (18.5 to 194.2)      | 94.7 (18.5 to 190.9)      | 101.4 (19.7 to 203.8)     | 63.5 (12.8 to 129.6)     | 61.9 (12.7 to 122.8)     | 67.6 (13.5 to 137.1)    | -35.2 (-52.9 to -9)     | -34.7 (-53.9 to -6.8)  | -33.4 (-52.3 to -4.1)  |
|                                          |             | YLLs    | 88.6 (16.6 to 178.1)      | 84.2 (16.5 to 171.4)      | 92.9 (17.8 to 188.1)      | 55 (10.9 to 113.2)       | 52.4 (10.9 to 107.2)     | 60.1 (12 to 123.8)      | -37.9 (-56.6 to -10.2)  | -37.8 (-58.3 to -7.3)  | -35.3 (-55 to -4.2)    |
|                                          |             | YLDs    | 9.5 (1.7 to 19.4)         | 10.5 (1.9 to 21.6)        | 8.5 (1.5 to 17.5)         | 8.5 (1.6 to 17.1)        | 9.5 (1.8 to 19.5)        | 7.5 (1.5 to 15.3)       | -10.4 (-21.1 to 5.1)    | -9.7 (-25.1 to 10.8)   | -12.2 (-26.3 to 8.9)   |
| Diet low in fruits                       | Deaths      | Deaths  | 5 (2.5 to 8.1)            | 5.3 (2.5 to 8.6)          | 4.8 (2.4 to 8)            | 3.8 (1.8 to 6.6)         | 4.1 (1.9 to 7.1)         | 3.8 (1.7 to 6.6)        | -24.4 (-48.5 to 12.1)   | -23.3 (-50.2 to 14)    | -20.9 (-48.5 to 19.3)  |
|                                          |             | DALYs   | 136.2 (65.7 to 222.5)     | 135.8 (65.9 to 219)       | 137 (67.1 to 227.7)       | 96.4 (44.4 to 167.8)     | 93.6 (42.9 to 163.6)     | 101.9 (47.6 to 178.9)   | -29.3 (-51 to 1.7)      | -31.1 (-53.2 to -0.3)  | -25.6 (-49.7 to 10.1)  |
|                                          |             | YLLs    | 124.5 (61.3 to 205)       | 122.4 (59.4 to 201.4)     | 126.8 (61.9 to 214.6)     | 84.4 (40.1 to 148.8)     | 80 (37.7 to 142.3)       | 91.7 (43.8 to 162.6)    | -32.1 (-54.4 to -0.7)   | -34.6 (-57.3 to -3)    | -27.7 (-52.4 to 9.4)   |
|                                          |             | YLDs    | 11.8 (4.4 to 20.4)        | 13.5 (5 to 23.8)          | 10.2 (4 to 17.5)          | 11.9 (4.3 to 22)         | 13.6 (4.8 to 25.5)       | 10.2 (3.9 to 18.7)      | 1.3 (-16.7 to 21.1)     | 0.5 (-18.4 to 21.8)    | 0.6 (-19.6 to 24.9)    |
| Diet low in vegetables                   | Deaths      | Deaths  | 2.1 (0.5 to 4.9)          | 2.1 (0.5 to 4.8)          | 2.1 (0.5 to 5.1)          | 2.5 (0.7 to 4.6)         | 2.6 (0.8 to 4.8)         | 2.6 (0.7 to 4.8)        | 20.3 (-29.3 to 135.7)   | 23.9 (-26.8 to 157.4)  | 23.8 (-30.6 to 175.9)  |
|                                          |             | DALYs   | 46 (9.1 to 117.9)         | 43.1 (8.5 to 106.7)       | 48.7 (9.4 to 129.9)       | 59.1 (15.6 to 110.4)     | 55.2 (15.4 to 101.4)     | 64.6 (16.9 to 123.5)    | 28.5 (-31.6 to 222.5)   | 28.3 (-30.9 to 223.7)  | 32.5 (-32 to 252)      |
|                                          |             | YLLs    | 41.8 (8.3 to 111.6)       | 38.7 (7.7 to 96.5)        | 44.8 (8.6 to 122.3)       | 52 (13.6 to 99.8)        | 47.5 (12.4 to 89.2)      | 58.2 (14.4 to 113.5)    | 24.3 (-34.9 to 217.2)   | 22.7 (-36.2 to 209.1)  | 29.7 (-34.7 to 255.4)  |
|                                          |             | YLDs    | 4.1 (0.7 to 9.1)          | 4.4 (0.8 to 9.6)          | 3.9 (0.7 to 8.8)          | 7.1 (1.9 to 12.8)        | 7.8 (2.1 to 14)          | 6.4 (1.8 to 11.6)       | 71.6 (1.2 to 316.9)     | 76.6 (1.2 to 333.4)    | 64.9 (-0.5 to 297.1)   |
| Diet low in whole grains                 | Deaths      | Deaths  | 5.3 (2.8 to 7.7)          | 6.1 (3.2 to 8.6)          | 4.7 (2.2 to 7.3)          | 4.6 (2.5 to 6.4)         | 5.5 (3.1 to 7.5)         | 4.2 (2.2 to 6.1)        | -14.1 (-38.1 to 18.1)   | -9.9 (-34.5 to 24.7)   | -10.3 (-42.2 to 31.5)  |
|                                          |             | DALYs   | 115.5 (55.7 to 165.1)     | 125.5 (62.9 to 178.1)     | 106.8 (46.9 to 162.6)     | 95.1 (49.6 to 134.5)     | 102.7 (55.7 to 141.9)    | 91.5 (45.6 to 132.6)    | -17.7 (-39.7 to 9.8)    | -18.1 (-38 to 10)      | -14.3 (-42.5 to 23.1)  |
|                                          |             | YLLs    | 97.1 (46.4 to 141.5)      | 103.6 (51.5 to 149.4)     | 91.4 (40.2 to 142.3)      | 77.1 (39.5 to 112)       | 81.7 (43.6 to 115.4)     | 76.4 (37.1 to 114.6)    | -20.6 (-45.2 to 11.5)   | -21.1 (-43.9 to 13.6)  | -16.4 (-47.2 to 27.6)  |
|                                          |             | YLDs    | 18.5 (8.2 to 27.8)        | 21.9 (10.1 to 32.6)       | 15.3 (6.5 to 23.3)        | 18 (9 to 26.5)           | 21 (10.6 to 30.8)        | 15.1 (7.4 to 22.6)      | -2.5 (-8.6 to 9.2)      | -4 (-12.7 to 7.8)      | -1.6 (-11.2 to 15.8)   |
| High body-mass index                     | Deaths      | Deaths  | 29 (17.1 to 44.1)         | 33.4 (19.6 to 50)         | 25.2 (13.4 to 39.1)       | 22.1 (12.8 to 33.7)      | 23.4 (14.1 to 34.9)      | 21.6 (11.8 to 33.9)     | -23.9 (-45.7 to 12.4)   | -29.8 (-50.6 to 3.8)   | -14.3 (-42.7 to 32.4)  |
|                                          |             | DALYs   | 933.9 (571.7 to 1368)     | 1038.9 (654.7 to 1493.5)  | 839.6 (465.5 to 1267.6)   | 680.5 (426 to 986.2)     | 683.1 (447.9 to 967)     | 688.1 (405.5 to 1042.4) | -27.1 (-46.5 to 5.9)    | -34.2 (-51.7 to -4.7)  | -18 (-42.7 to 23.5)    |
|                                          |             | YLLs    | 847.2 (511 to 1264.6)     | 928 (573.1 to 1352.9)     | 775 (428.1 to 1190.4)     | 590.6 (356.6 to 871.1)   | 574.6 (365.6 to 822.9)   | 617.1 (356.8 to 960.2)  | -30.3 (-50.6 to 5.5)    | -38.1 (-56.5 to -5.5)  | -20.4 (-46.2 to 24.2)  |
|                                          |             | YLDs    | 86.8 (50.1 to 130.3)      | 110.9 (66.6 to 161.4)     | 64.5 (33.7 to 101.1)      | 89.9 (55.4 to 128.3)     | 108.4 (68.5 to 152.4)    | 71 (42.6 to 104.7)      | 3.6 (-7 to 20.9)        | -2.2 (-11.9 to 14.4)   | 10 (-6.5 to 41.4)      |
| High fasting plasma glucose              | Deaths      | Deaths  | 26.2 (15.4 to 46.5)       | 30 (16.4 to 57.5)         | 22.9 (13.5 to 40.2)       | 31.1 (17.6 to 55.6)      | 34.5 (18.7 to 64.5)      | 30 (17.1 to 52.1)       | 18.6 (-19.7 to 75.8)    | 15.1 (-24.2 to 79.5)   | 31.1 (-15.9 to 110.5)  |
|                                          |             | DALYs   | 505.8 (316.9 to 815.3)    | 547.2 (326.3 to 908.8)    | 469.3 (297.4 to 756.1)    | 589.9 (365.6 to 968.3)   | 599.9 (361.4 to 987.5)   | 598.6 (366 to 940.6)    | 16.6 (-19.6 to 70.1)    | 9.6 (-26.3 to 68.9)    | 27.5 (-17.3 to 97.9)   |
|                                          |             | YLLs    | 461.4 (290.6 to 740)      | 493.8 (292.3 to 837.1)    | 433 (275.9 to 690.1)      | 522.7 (313.6 to 846.7)   | 523.2 (308.3 to 879.5)   | 540.1 (324 to 848.6)    | 13.3 (-23.5 to 70.7)    | 6 (-29.9 to 68.4)      | 24.7 (-21.4 to 99.6)   |
|                                          |             | YLDs    | 44.4 (24.7 to 76)         | 53.5 (28.3 to 94)         | 36.3 (20.8 to 60.9)       | 67.1 (37.7 to 112.3)     | 76.6 (42.5 to 128.7)     | 58.4 (32.4 to 95.7)     | 51.1 (20.3 to 92.6)     | 43.4 (9.4 to 91.8)     | 60.8 (20.7 to 110.4)   |
| High LDL cholesterol                     | Deaths      | Deaths  | 14.6 (5.8 to 29.5)        | 16.9 (6.2 to 36.3)        | 12.6 (5.2 to 24.4)        | 11.9 (4.3 to 24.9)       | 14.8 (4.7 to 33.3)       | 10.6 (4.1 to 21.5)      | -18.5 (-42.6 to 9.4)    | -12.3 (-40.3 to 21)    | -16.3 (-46.2 to 20.7)  |
|                                          |             | DALYs   | 333.8 (194.7 to 549.9)    | 364.5 (204.3 to 611.6)    | 306.5 (177 to 505.3)      | 259.5 (141.1 to 442)     | 285.5 (145.4 to 509.2)   | 246 (137.8 to 425.7)    | -22.2 (-43 to 2.5)      | -21.7 (-43 to 5.2)     | -19.7 (-44.6 to 14.8)  |
|                                          |             | YLLs    | 277.8 (155.2 to 471.5)    | 297.8 (161 to 526.8)      | 260.5 (144.6 to 439.8)    | 207.5 (105 to 372.4)     | 223.8 (104.2 to 422.3)   | 203.4 (107.9 to 361)    | -25.3 (-48.7 to 5.1)    | -24.9 (-50 to 8.2)     | -21.9 (-49.6 to 19.4)  |
|                                          |             | YLDs    | 56 (34.2 to 89.4)         | 66.7 (40.3 to 106.5)      | 46.1 (28.3 to 74.3)       | 52.1 (31.4 to 83.9)      | 61.7 (37.1 to 98.2)      | 42.7 (26.1 to 67.8)     | -6.9 (-13.3 to -0.3)    | -7.5 (-16 to 0.8)      | -7.4 (-16.6 to 3.6)    |
| High systolic blood pressure             | Deaths      | Deaths  | 69.5 (50.8 to 91.6)       | 76.5 (55.1 to 103.3)      | 63.3 (45.4 to 86.6)       | 48 (34.8 to 64.6)        | 55.1 (39 to 74.6)        | 45.3 (32.2 to 62.7)     | -30.8 (-51.2 to -2.1)   | -28 (-51.6 to 3.2)     | -28.4 (-51.2 to 4.5)   |
|                                          |             | DALYs   | 1564.3 (1202.9 to 1991.1) | 1616.2 (1209.6 to 2106.6) | 1521.5 (1121.7 to 2007.7) | 1021.4 (756.7 to 1342.5) | 1041.5 (763.7 to 1370.1) | 1041 (765.4 to 1424.1)  | -34.7 (-52.5 to -9.3)   | -35.6 (-55.2 to -9.3)  | -31.6 (-52.1 to -1)    |
|                                          |             | YLLs    | 1425.7 (1081.7 to 1851)   | 1454.4 (1066.5 to 1944.7) | 1404 (1017.7 to 1873.7)   | 900.4 (655.3 to 1219)    | 902 (650.6 to 1225.3)    | 937 (673.3 to 1305.1)   | -36.8 (-55.8 to -8.8)   | -38 (-58.2 to -10.4)   | -33.3 (-54.7 to -0.1)  |
|                                          |             | YLDs    | 138.5 (94.9 to 184.1)     | 161.9 (110.4 to 220.1)    | 117.5 (80.7 to 156.1)     | 121 (84.5 to 160.9)      | 139.5 (96.3 to 186.4)    | 104 (72.2 to 139.9)     | -12.7 (-23.6 to -0.2)   | -13.8 (-29.9 to 5.6)   | -11.4 (-25.2 to 3.5)   |
| High temperature                         | Deaths      | Deaths  | 0.7 (-0.6 to 3)           | 0.7 (-0.7 to 3)           | 0.6 (-0.6 to 2.8)         | 0.7 (-0.4 to 2.2)        | 0.9 (-0.4 to 2.5)        | 0.7 (-0.3 to 2.2)       | 14.1 (-346 to 359.4)    | 22.7 (-365.3 to 406.8) | 14.4 (-346.9 to 344.9) |
|                                          |             | YLLs    | 14 (-12.6 to 64.5)        | 13.6 (-12.4 to 62)        | 14.3 (-13.1 to 64.7)      | 13.5 (-6.3 to 39.9)      | 13.5 (-6.4 to 39.7)      | 14.1 (-6.7 to 43.3)     | -3.4 (-303.6 to 263.9)  | -1.2 (-315.4 to 282.8) | -1.7 (-314.7 to 278.9) |
| Household air pollution from solid fuels | Deaths      | Deaths  | 4.9 (2 to 10.1)           | 5.9 (2.5 to 11.9)         | 3.9 (1.5 to 8.7)          | 0 (0 to 0.1)             | 0 (0 to 0.1)             | 0 (0 to 0.1)            | -99.3 (-99.7 to -98.2)  | -99.2 (-99.7 to -98)   | -99.3 (-99.8 to -98.1) |
|                                          |             | DALYs   | 121.1 (50.7 to 251.2)     | 141.3 (60.4 to 284.8)     | 102.8 (40.9 to 228.5)     | 0.8 (0.3 to 1.9)         | 1 (0.4 to 2.2)           | 0.7 (0.2 to 1.6)        | -99.3 (-99.8 to -98.3)  | -99.3 (-99.8 to -98.2) | -99.3 (-99.8 to -98.2) |
|                                          |             | YLLs    | 109.5 (45.7 to 227.9)     | 126.2 (53.3 to 253.4)     | 94.5 (36.8 to 208)        | 0.7 (0.3 to 1.6)         | 0.8 (0.3 to 1.9)         | 0.6 (0.2 to 1.4)        | -99.4 (-99.8 to -98.3)  | -99.3 (-99.8 to -98.3) | -99.4 (-99.8 to -98.2) |
|                                          |             | YLDs    | 11.6 (4.8 to 24.1)        | 15.2 (6.5 to 30.6)        | 8.3 (3.2 to 18.8)         | 0.1 (0 to 0.2)           | 0.1 (0.1 to 0.3)         | 0.1 (0 to 0.2)          | -99.1 (-99.6 to -97.6)  | -99.1 (-99.6 to -97.6) | -99.1 (-99.7 to -97.7) |
| Kidney dysfunction                       | Deaths      | Deaths  | 11.2 (7.9 to 15.3)        | 13.2 (9 to 18.5)          | 9.5 (6.8 to 12.9)         | 10.4 (6.6 to 14.6)       | 11.8 (6.8 to 16.7)       | 9.5 (6.2 to 13.3)       | -7.7 (-35.2 to 29.6)    | -10.4 (-39.6 to 27.5)  | 0.2 (-33.7 to 46.9)    |
|                                          |             | DALYs   | 244.9 (186.9 to 317.6)    | 279 (210.2 to 364.3)      | 214.2 (161.4 to 286.5)    | 212.3 (151.8 to 282.2)   | 229.1 (158.5 to 306.4)   | 200.4 (141.2 to 273.2)  | -13.3 (-37.4 to 19.3)   | -17.9 (-40.2 to 13.9)  | -6.5 (-35.5 to 35.3)   |
|                                          |             | YLLs    | 220.7 (165.7 to 292.3)    | 248.3 (181 to 329.4)      | 196 (145.9 to 264.4)      | 185.2 (128.8 to 250.8)   | 196.2 (131.9 to 267.6)   | 179 (121.7 to 247.3)    | -16.1 (-41.6 to 20.1)   | -21 (-45.8 to 14.4)    | -8.7 (-39.5 to 36.2)   |

| Location               | Risk factor                          | Measure                | 1990                    |                         |                           | 2019                     |                          |                        | % Change (1990 to 2019)   |                          |                        |
|------------------------|--------------------------------------|------------------------|-------------------------|-------------------------|---------------------------|--------------------------|--------------------------|------------------------|---------------------------|--------------------------|------------------------|
|                        |                                      |                        | Both                    | Female                  | Male                      | Both                     | Female                   | Male                   | Both                      | Female                   | Male                   |
|                        | Lead exposure                        | YLDs                   | 24.2 (16.8 to 32.1)     | 30.7 (20.9 to 41.1)     | 18.2 (12.4 to 24.4)       | 27.1 (18.6 to 36.6)      | 32.9 (22.5 to 44.6)      | 21.4 (14.7 to 29.1)    | 11.9 (3.3 to 21)          | 7.1 (-2.4 to 17.4)       | 17.2 (4.8 to 30.8)     |
|                        |                                      | Deaths                 | 8.2 (4.8 to 12.1)       | 6.9 (3.7 to 10.9)       | 9.4 (5.7 to 13.9)         | 5.4 (3.1 to 8.3)         | 4.9 (2.5 to 7.7)         | 6 (3.6 to 9.2)         | -34.6 (-53.1 to -10.1)    | -30 (-49.1 to -2)        | -35.7 (-55.8 to -7.3)  |
|                        |                                      | DALYs                  | 193.5 (114 to 284.7)    | 152.1 (80.1 to 232.1)   | 231.8 (141.9 to 341)      | 102.2 (57.3 to 157)      | 82.7 (41.1 to 133.5)     | 123 (70.1 to 187.1)    | -47.2 (-62.5 to -27.4)    | -45.7 (-60.3 to -24.7)   | -47 (-63.1 to -24.6)   |
|                        | Low physical activity                | YLLs                   | 176.8 (103.5 to 261.9)  | 136.8 (69.8 to 210.7)   | 213.9 (129.3 to 319.4)    | 91.3 (51 to 142.6)       | 72.5 (36.1 to 118.4)     | 111.3 (62.8 to 173.9)  | -48.4 (-64.4 to -26.7)    | -47 (-62.5 to -23.6)     | -48 (-64.8 to -23.4)   |
|                        |                                      | YLDs                   | 16.6 (9.4 to 25.4)      | 15.3 (7.5 to 24.5)      | 17.9 (10.9 to 26.8)       | 10.9 (5.6 to 17.5)       | 10.1 (4.6 to 17.2)       | 11.7 (6.4 to 18)       | -34.5 (-44.3 to -27)      | -33.7 (-45.7 to -25.2)   | -34.7 (-45.1 to -25.5) |
|                        |                                      | Deaths                 | 6.5 (1.4 to 14.1)       | 7.6 (1.9 to 15.9)       | 5.6 (1.1 to 12.5)         | 5.6 (1.3 to 11.4)        | 7.2 (1.8 to 14.5)        | 4.8 (0.9 to 10)        | -14.7 (-38.6 to 16.2)     | -5.6 (-34.4 to 34)       | -14 (-43.5 to 25.6)    |
|                        | Low temperature                      | DALYs                  | 103.9 (21.9 to 240.2)   | 116.4 (27.1 to 260.6)   | 92.7 (15.9 to 223.9)      | 86.1 (17.5 to 195.8)     | 101.2 (23.3 to 217)      | 77.6 (13.5 to 179.6)   | -17.1 (-39 to 11.1)       | -13.1 (-35.5 to 20)      | -16.3 (-43.4 to 20.2)  |
|                        |                                      | YLLs                   | 90.4 (19 to 209.4)      | 100.3 (23.8 to 224.1)   | 81.7 (14.6 to 201.1)      | 73.2 (15.5 to 161.8)     | 85.8 (20.2 to 181)       | 67 (11.9 to 155.5)     | -19.1 (-43.8 to 13.8)     | -14.5 (-39.4 to 24.4)    | -17.9 (-47.6 to 23.7)  |
|                        |                                      | YLDs                   | 13.4 (2.4 to 34)        | 16.1 (3.2 to 39.2)      | 11 (1.7 to 29.1)          | 12.9 (2.3 to 32.2)       | 15.4 (3.1 to 37.5)       | 10.6 (1.7 to 26.8)     | -4 (-12.4 to 9.1)         | -3.9 (-14.2 to 12.9)     | -4.1 (-15 to 13.2)     |
|                        | Secondhand smoke                     | Deaths                 | 10.3 (4.3 to 17.8)      | 10.9 (4.4 to 19.1)      | 9.8 (4.1 to 16.8)         | 6.9 (2.9 to 11.4)        | 7.8 (3.4 to 13)          | 6.5 (2.7 to 11.1)      | -33.3 (-50.3 to -8.7)     | -28.5 (-47 to -1.6)      | -32.9 (-52.7 to -4.9)  |
|                        |                                      | YLLs                   | 218.5 (91.7 to 373.7)   | 213.7 (88.1 to 374.2)   | 223.4 (93.9 to 375.3)     | 123.7 (50.9 to 208.1)    | 123.5 (52.4 to 206.6)    | 128.9 (52.6 to 219)    | -43.4 (-59 to -20.6)      | -42.2 (-58 to -18.9)     | -42.3 (-59.6 to -17.9) |
|                        |                                      | Deaths                 | 5.1 (3.5 to 7)          | 5.9 (4 to 8)            | 4.4 (2.9 to 6.2)          | 3.1 (2.1 to 4.3)         | 3.5 (2.5 to 4.8)         | 2.7 (1.8 to 4)         | -40.2 (-57.3 to -15.3)    | -40.3 (-57.7 to -14.8)   | -37.5 (-57.6 to -7.4)  |
|                        | Smoking                              | DALYs                  | 134.6 (93.4 to 186.3)   | 158.7 (109.2 to 219.5)  | 111.8 (74.1 to 156.9)     | 76.3 (52.2 to 107)       | 86.3 (59.6 to 120)       | 67 (44.5 to 96.9)      | -43.3 (-59.6 to -21.5)    | -45.6 (-61.5 to -22)     | -40 (-58.5 to -12.3)   |
|                        |                                      | YLLs                   | 126.6 (87.2 to 176.7)   | 147.9 (101.1 to 205.9)  | 106.5 (70.2 to 152.2)     | 69.8 (46.7 to 99.4)      | 77.5 (52.7 to 109.1)     | 62.9 (41 to 92.4)      | -44.9 (-61.4 to -21.6)    | -47.6 (-64.4 to -22.4)   | -41 (-60 to -11.8)     |
|                        |                                      | YLDs                   | 8 (5.1 to 11.1)         | 10.8 (6.9 to 15)        | 5.3 (3.4 to 7.6)          | 6.5 (4.2 to 9)           | 8.8 (5.7 to 12.2)        | 4.2 (2.7 to 5.8)       | -17.9 (-24.7 to -10.1)    | -18.9 (-26.7 to -9.4)    | -21 (-32.8 to -6)      |
|                        | Smoking                              | Deaths                 | 23.4 (18.5 to 29.6)     | 9.9 (6.8 to 13.5)       | 35.7 (27.8 to 45.8)       | 11.9 (8.8 to 16.2)       | 3.9 (2.7 to 5.6)         | 19.3 (14 to 26.2)      | -49 (-65.1 to -24.1)      | -60.2 (-74.5 to -35.5)   | -45.9 (-62.7 to -18.3) |
| DALYs                  |                                      | 645.5 (514.1 to 804.2) | 281.5 (196.9 to 380.2)  | 980.8 (775.8 to 1221.8) | 319 (236.7 to 425.8)      | 108.1 (75.8 to 149.5)    | 525.9 (387.5 to 708.2)   | -50.6 (-65.2 to -28.3) | -61.6 (-75.1 to -39.5)    | -46.4 (-62.1 to -19.7)   |                        |
| YLLs                   |                                      | 587.5 (461.7 to 747.8) | 249.3 (169.8 to 340.2)  | 899 (690.1 to 1139)     | 281.8 (204.7 to 387)      | 90.5 (61.9 to 129.9)     | 468.9 (337.6 to 646.8)   | -52 (-67.5 to -27.3)   | -63.7 (-77.3 to -40.4)    | -47.8 (-64.3 to -19.1)   |                        |
|                        |                                      | YLDs                   | 58 (41.6 to 74.1)       | 32.1 (21.3 to 44.7)     | 81.9 (59.7 to 105.2)      | 37.3 (26.8 to 48.4)      | 17.6 (11.7 to 25)        | 57 (40.4 to 74.5)      | -35.7 (-42.9 to -27.9)    | -45.2 (-60.1 to -24.8)   | -30.4 (-37.3 to -22.2) |
| Tunisia                | All risk factors                     | Deaths                 | 85.1 (69.7 to 102.6)    | 82.3 (65.2 to 102.2)    | 88.1 (69.6 to 107.8)      | 65.8 (48.1 to 85.4)      | 61.3 (45.4 to 80.1)      | 70.9 (50.4 to 94.2)    | -22.7 (-43.5 to 3)        | -25.5 (-46 to 0.2)       | -19.6 (-43.7 to 9.7)   |
|                        |                                      | DALYs                  | 1597.9 (1317.3 to 1901) | 1576 (1286.5 to 1913)   | 1620.7 (1298 to 1991.7)   | 1263 (963 to 1624.7)     | 1199.8 (921.8 to 1525.2) | 1331.2 (987 to 1741.2) | -21 (-41.6 to 5.3)        | -23.9 (-42.3 to 1.3)     | -17.9 (-40.8 to 11.6)  |
|                        |                                      | YLLs                   | 1461.5 (1179 to 1759.6) | 1420 (1129.6 to 1756.7) | 1503.2 (1175.9 to 1860.4) | 1092.5 (794.7 to 1437.7) | 1004.5 (740.3 to 1311.7) | 1187 (850.5 to 1596)   | -25.2 (-46.5 to 2.4)      | -29.3 (-48.6 to -2.4)    | -21 (-45.5 to 10.6)    |
|                        | Alcohol use                          | YLDs                   | 136.4 (99.7 to 173)     | 156 (114.6 to 199.2)    | 117.6 (85.1 to 148.8)     | 170.6 (124.7 to 216.1)   | 195.4 (141.3 to 248.9)   | 144.2 (104.6 to 183.5) | 25 (17.4 to 33.2)         | 25.2 (14.8 to 36.5)      | 22.6 (12.2 to 34)      |
|                        |                                      | Deaths                 | 0.3 (0 to 0.7)          | -0.1 (-0.3 to 0.1)      | 0.7 (0.1 to 1.4)          | 0.4 (0.1 to 0.8)         | -0.1 (-0.3 to 0.1)       | 1 (0.4 to 1.8)         | 39.4 (-225.4 to 801.6)    | -12.5 (-494.6 to 604.8)  | 40.3 (-33.3 to 449.6)  |
|                        |                                      | DALYs                  | 11.6 (3.3 to 21.2)      | -0.3 (-5.3 to 6)        | 23.2 (8 to 40.1)          | 15 (6.7 to 24.8)         | 0.2 (-5.2 to 6.5)        | 30.6 (15.2 to 49.2)    | 29.4 (-29.7 to 211.4)     | -177.1 (-1194.9 to 1085) | 31.7 (-22.2 to 176.4)  |
|                        | Ambient particulate matter pollution | YLLs                   | 11.4 (3.4 to 20.4)      | 0.3 (-4.3 to 6.1)       | 22.1 (7.5 to 38.5)        | 13.7 (6.2 to 22.9)       | 0.6 (-4 to 5.7)          | 27.5 (13.7 to 45.4)    | 20.9 (-34 to 183.6)       | 112.6 (-817.8 to 920)    | 24.5 (-27.7 to 161.7)  |
|                        |                                      | YLDs                   | 0.3 (-0.4 to 1)         | -0.6 (-1.2 to 0.1)      | 1.1 (0 to 2.3)            | 1.3 (0.2 to 2.5)         | -0.4 (-1.4 to 0.7)       | 3 (1.2 to 5)           | 401.9 (-2280.8 to 4328.8) | -40.5 (-508.4 to 462.2)  | 176.9 (44.4 to 1462.5) |
|                        |                                      | Deaths                 | 16.7 (10.7 to 23.9)     | 15.6 (9.7 to 22.4)      | 17.8 (11.1 to 25.5)       | 15.4 (10.1 to 21.9)      | 14.4 (9.6 to 20)         | 16.4 (10.6 to 24.1)    | -7.8 (-34 to 31.8)        | -7.6 (-34.4 to 36.6)     | -7.7 (-36.3 to 36.3)   |
|                        | Diet high in red meat                | DALYs                  | 354.3 (231.4 to 499.6)  | 338.1 (215.4 to 484.8)  | 370 (236.7 to 524.8)      | 336.9 (232.4 to 471.7)   | 323.2 (224.3 to 444)     | 351.4 (238.5 to 501.2) | -4.9 (-31.2 to 34.7)      | -4.4 (-31 to 38.9)       | -5 (-32.4 to 39.1)     |
|                        |                                      | YLLs                   | 322 (206.6 to 460.1)    | 302.3 (189.4 to 436.2)  | 341.1 (212.4 to 488.6)    | 287.6 (190.7 to 413.2)   | 266.2 (175.4 to 378.8)   | 310.2 (205.1 to 457.5) | -10.7 (-37.8 to 30.9)     | -11.9 (-39.2 to 32.4)    | -9.1 (-38.1 to 37.7)   |
|                        |                                      | YLDs                   | 32.3 (19.6 to 47.2)     | 35.8 (21.3 to 53.3)     | 28.9 (17.2 to 41.8)       | 49.3 (32.3 to 69.4)      | 57 (37.3 to 80)          | 41.2 (27.1 to 57.9)    | 52.6 (31.4 to 94.2)       | 59 (32.6 to 109.1)       | 42.6 (23.7 to 79.3)    |
|                        | Diet high in sodium                  | Deaths                 | 2.9 (1 to 4.7)          | 2.9 (1 to 4.7)          | 3 (1.1 to 5)              | 2 (0.6 to 3.6)           | 1.9 (0.6 to 3.3)         | 2.2 (0.7 to 3.9)       | -30.6 (-58.6 to 4.5)      | -34 (-61.3 to 3.4)       | -27 (-57.9 to 14.9)    |
|                        |                                      | DALYs                  | 68.8 (24.1 to 109.7)    | 69.1 (24.6 to 111.2)    | 68.4 (24.3 to 111.4)      | 49 (16.6 to 83.4)        | 46.9 (15.8 to 79.9)      | 51.3 (16.8 to 90.8)    | -28.7 (-56.4 to 10)       | -32.1 (-58.6 to 6.3)     | -25.1 (-55.2 to 17.4)  |
|                        |                                      | YLLs                   | 62 (21 to 100.7)        | 61.3 (20.7 to 101.1)    | 62.8 (21.5 to 102.9)      | 41.4 (14.1 to 72.3)      | 38.1 (13.4 to 66.7)      | 44.9 (15.2 to 81.9)    | -33.3 (-59.6 to 7.7)      | -37.9 (-62.5 to 3.3)     | -28.5 (-58.9 to 17.9)  |
|                        | Diet low in fiber                    | YLDs                   | 6.7 (1.9 to 11.2)       | 7.8 (2.2 to 13.1)       | 5.7 (1.6 to 9.6)          | 7.7 (2 to 13)            | 8.9 (2.3 to 15.1)        | 6.4 (1.6 to 10.8)      | 13.9 (-1.5 to 26.7)       | 13.6 (-6 to 30.2)        | 12.7 (-4.3 to 28.6)    |
|                        |                                      | Deaths                 | 1.7 (0.3 to 6.7)        | 1.2 (0.3 to 4.7)        | 2.2 (0.2 to 9)            | 1.2 (0.2 to 4.9)         | 0.8 (0.2 to 3.3)         | 1.7 (0.2 to 6.5)       | -27 (-57 to 37.2)         | -31 (-66.2 to 44.3)      | -22.8 (-59.2 to 65.6)  |
|                        |                                      | DALYs                  | 35.8 (4.6 to 145.9)     | 25 (4.7 to 102.8)       | 46.3 (3.8 to 192.2)       | 27 (3.6 to 109.9)        | 17.9 (3.6 to 76.7)       | 36.7 (3 to 146.2)      | -24.7 (-53.9 to 40.3)     | -28.4 (-67.3 to 56.5)    | -20.7 (-52.7 to 59.1)  |
|                        | Diet low in fruits                   | YLLs                   | 32.8 (4.2 to 133.7)     | 22.4 (4.3 to 93.3)      | 42.9 (3.5 to 176.9)       | 23.4 (3 to 92.9)         | 14.8 (3 to 62.9)         | 32.5 (2.6 to 129.8)    | -28.9 (-58.4 to 35.4)     | -34 (-69.9 to 45.5)      | -24.2 (-55.6 to 58.1)  |
|                        |                                      | YLDs                   | 3 (0.4 to 12.1)         | 2.5 (0.4 to 10.3)       | 3.5 (0.3 to 13.8)         | 3.6 (0.5 to 14.4)        | 3.1 (0.6 to 12.9)        | 4.2 (0.3 to 16.5)      | 21.2 (-27.7 to 121.7)     | 22.1 (-44.3 to 169.1)    | 22.2 (-18.7 to 123)    |
|                        |                                      | Deaths                 | 1.2 (0.3 to 2.6)        | 1.2 (0.3 to 2.5)        | 1.3 (0.3 to 2.7)          | 0.6 (0.2 to 1.3)         | 0.5 (0.2 to 1.2)         | 0.7 (0.2 to 1.5)       | -52.5 (-68.6 to -23.6)    | -54.4 (-73.8 to -21.5)   | -50.3 (-69 to -15.2)   |
|                        | Diet low in vegetables               | DALYs                  | 23.6 (5.7 to 50.3)      | 22.9 (5.5 to 50)        | 24.3 (5.9 to 51)          | 11.4 (3.6 to 25.3)       | 10.5 (3.3 to 22.9)       | 12.4 (3.6 to 28.5)     | -51.7 (-65.7 to -26.7)    | -54.3 (-69.2 to -27)     | -49 (-66.2 to -17.6)   |
|                        |                                      | YLLs                   | 21.3 (5.2 to 45.6)      | 20.3 (4.9 to 44.9)      | 22.4 (5.4 to 47.1)        | 9.7 (3 to 21.8)          | 8.6 (2.8 to 19)          | 10.9 (3.2 to 25.1)     | -54.5 (-69.1 to -28.8)    | -57.7 (-72.7 to -30.3)   | -51.1 (-68.6 to -19)   |
|                        |                                      | YLDs                   | 2.2 (0.5 to 5)          | 2.5 (0.6 to 5.9)        | 2 (0.5 to 4.4)            | 1.7 (0.5 to 3.8)         | 1.9 (0.5 to 4.5)         | 1.5 (0.4 to 3.5)       | -25.6 (-40.2 to 3.7)      | -26.6 (-45.5 to 4.1)     | -25.1 (-44.2 to 6)     |
| Diet low in vegetables | Deaths                               | 4.5 (2 to 7.8)         | 4.5 (2 to 7.8)          | 4.5 (2 to 7.9)          | 2.2 (0.9 to 4)            | 2.1 (0.8 to 3.8)         | 2.3 (0.9 to 4.2)         | -51.7 (-70.4 to -26.4) | -53.4 (-72.2 to -28)      | -49.9 (-71.8 to -19.3)   |                        |
|                        | DALYs                                | 100.2 (45 to 174.1)    | 102.6 (46.2 to 178.8)   | 97.8 (44 to 174.3)      | 51.6 (20.9 to 89.7)       | 51 (20.3 to 90.4)        | 52.1 (21 to 92.2)        | -48.5 (-67.7 to -23)   | -50.3 (-69.4 to -25.9)    | -46.7 (-67.8 to -17.2)   |                        |
|                        | YLLs                                 | 91.5 (41.4 to 161)     | 92.4 (41.5 to 161)      | 90.7 (41.2 to 163.7)    | 43.8 (18.2 to 77.4)       | 41.8 (16.8 to 75.9)      | 46 (19 to 81.7)          | -52.1 (-70.7 to -25.3) | -54.7 (-72.7 to -29.6)    | -49.3 (-70.3 to -18.2)   |                        |
| Diet low in vegetables | YLDs                                 | 8.7 (2.9 to 16.4)      | 10.2 (3.5 to 19.4)      | 7.1 (2.3 to 13.6)       | 7.7 (2.5 to 14.7)         | 9.2 (3 to 17.3)          | 6.2 (2 to 12.1)          | -10.9 (-29.8 to 8.6)   | -10.4 (-31.1 to 10)       | -13.3 (-34 to 9.5)       |                        |
|                        | Deaths                               | 1.9 (0.6 to 3.8)       | 1.8 (0.5 to 3.6)        | 2.1 (0.6 to 4)          | 0.5 (0.2 to 1.1)          | 0.5 (0.2 to 1)           | 0.6 (0.2 to 1.3)         | -71.8 (-84.7 to -43.1) | -73.8 (-86.9 to -44.9)    | -69.5 (-85 to -38.7)     |                        |
|                        |                                      | DALYs                  | 39.4 (10.1 to 80.1)     | 37.7 (9.5 to 78.6)      | 41 (10.3 to 83.9)         | 9 (3.2 to 19.6)          | 7.9 (3 to 16.8)          | 10.3 (3.2 to 22.4)     | -77.1 (-87.6 to -49.3)    | -79.1 (-89.1 to -51.5)   | -75 (-87.6 to -45.7)   |

| Location                                 | Risk factor | Measure | 1990                    |                         |                         | 2019                   |                        |                         | % Change (1990 to 2019) |                         |                        |
|------------------------------------------|-------------|---------|-------------------------|-------------------------|-------------------------|------------------------|------------------------|-------------------------|-------------------------|-------------------------|------------------------|
|                                          |             |         | Both                    | Female                  | Male                    | Both                   | Female                 | Male                    | Both                    | Female                  | Male                   |
| Diet low in whole grains                 | Deaths      | YLLs    | 35.9 (9 to 75)          | 33.8 (8.6 to 71.7)      | 38 (9.3 to 78.9)        | 7.9 (2.7 to 16.8)      | 6.7 (2.5 to 14.3)      | 9.2 (2.8 to 20.4)       | -78 (-88.4 to -49.8)    | -80.3 (-89.9 to -52.1)  | -75.7 (-88.4 to -45.5) |
|                                          |             | YLDs    | 3.5 (0.7 to 6.7)        | 3.9 (0.8 to 7.6)        | 3.1 (0.7 to 5.8)        | 1.1 (0.4 to 2.5)       | 1.2 (0.4 to 2.7)       | 1.1 (0.3 to 2.5)        | -67.5 (-82 to -37)      | -69.4 (-83.3 to -35.3)  | -65.6 (-82.8 to -34.8) |
|                                          |             | Deaths  | 4.4 (2.3 to 6.2)        | 4.5 (2.5 to 6.4)        | 4.3 (2.1 to 6.2)        | 4.3 (2.1 to 6.4)       | 4.1 (2 to 6.1)         | 4.5 (2.1 to 7)          | -2.5 (-31.3 to 29.4)    | -8.9 (-36.1 to 24.6)    | 4.9 (-29.4 to 49)      |
|                                          |             | DALYs   | 79.7 (39.4 to 113.5)    | 82.1 (42 to 117.3)      | 77.5 (36.3 to 112.5)    | 84.9 (40 to 125.7)     | 82.8 (39.3 to 122.5)   | 87.1 (38.9 to 135.7)    | 6.5 (-20.9 to 38.6)     | 0.9 (-25.5 to 31.9)     | 12.4 (-20 to 56)       |
| High body-mass index                     | Deaths      | YLLs    | 67.7 (34.1 to 96.9)     | 68 (35.5 to 100.2)      | 67.4 (31.6 to 98.9)     | 70 (33.2 to 107)       | 65.5 (30.9 to 99.1)    | 74.7 (33.4 to 118.5)    | 3.4 (-27.4 to 41.7)     | -3.6 (-33.9 to 33.5)    | 10.8 (-26 to 60.3)     |
|                                          |             | YLDs    | 12.1 (5.5 to 18)        | 14.1 (6.6 to 21.3)      | 10.1 (4.4 to 15.3)      | 14.9 (6.5 to 22.4)     | 17.3 (7.6 to 26.2)     | 12.4 (5.3 to 18.5)      | 23.6 (13.4 to 33.5)     | 22.2 (7.5 to 36.3)      | 23 (7.8 to 39.4)       |
|                                          |             | Deaths  | 16.8 (9.5 to 25.5)      | 19.4 (11.6 to 29.1)     | 14.3 (7.2 to 23.2)      | 15.6 (8.8 to 24.7)     | 15.9 (9.3 to 24.6)     | 15.2 (7.9 to 25.3)      | -7.1 (-35.8 to 34.9)    | -18.2 (-43.5 to 18.1)   | 6.3 (-31.4 to 69.4)    |
|                                          |             | DALYs   | 481.6 (297.4 to 694.6)  | 561.7 (365.2 to 796.1)  | 405.9 (220.9 to 630.9)  | 450 (280.8 to 668)     | 466.7 (300.3 to 674)   | 432 (247.5 to 667.5)    | -6.6 (-32.8 to 31.4)    | -16.9 (-39.9 to 13.5)   | 6.4 (-29.5 to 63.9)    |
| High fasting plasma glucose              | Deaths      | YLLs    | 435.4 (267.6 to 635.2)  | 501.2 (324.6 to 719)    | 373.3 (202.2 to 585)    | 377.6 (224.5 to 578.9) | 377.6 (231.3 to 567.5) | 377 (206.6 to 596.7)    | -13.3 (-40.5 to 26.6)   | -24.7 (-48.2 to 8.3)    | 1 (-35.8 to 61.6)      |
|                                          |             | YLDs    | 46.2 (27.1 to 69.3)     | 60.5 (37 to 89.5)       | 32.6 (17.3 to 51.4)     | 72.3 (45.4 to 105.2)   | 89.1 (56.5 to 127.4)   | 55 (32.6 to 81.8)       | 56.5 (38.2 to 85.2)     | 47.2 (28.9 to 72.2)     | 68.6 (41.2 to 124.5)   |
|                                          |             | Deaths  | 24.6 (13.3 to 47.8)     | 20.7 (10.4 to 42.3)     | 28.8 (15.6 to 54.1)     | 25.9 (13.6 to 48.4)    | 24 (12.3 to 46)        | 28 (14.3 to 53)         | 4.9 (-28.2 to 52.7)     | 15.8 (-25.9 to 77.1)    | -2.8 (-36.7 to 45.2)   |
|                                          |             | DALYs   | 401.2 (240.1 to 694.5)  | 337.5 (187.6 to 609.4)  | 461.8 (270 to 764.1)    | 470.3 (273.5 to 802.5) | 438.1 (249.1 to 768.9) | 504.6 (288.5 to 875.3)  | 17.2 (-18.8 to 69.6)    | 29.8 (-15.6 to 96.3)    | 9.3 (-27.8 to 65.9)    |
| High LDL cholesterol                     | Deaths      | YLLs    | 370.6 (219 to 642.4)    | 307.1 (168.7 to 558.4)  | 431.2 (250.1 to 709.8)  | 410.1 (241 to 704)     | 370.9 (208.5 to 648.8) | 451.8 (254.3 to 784.2)  | 10.6 (-25.8 to 63.7)    | 20.8 (-23.2 to 87.9)    | 4.8 (-33 to 60.7)      |
|                                          |             | YLDs    | 30.6 (16.2 to 54.4)     | 30.4 (16.2 to 56.4)     | 30.6 (15.9 to 54.6)     | 60.3 (32.4 to 102.3)   | 67.2 (35.2 to 117.9)   | 52.8 (28.6 to 87.5)     | 96.8 (58.8 to 146.2)    | 121 (60.8 to 206.9)     | 72.2 (33.9 to 126.8)   |
|                                          |             | Deaths  | 11.9 (3.6 to 26.4)      | 11.9 (3.5 to 26.9)      | 12 (3.8 to 27.7)        | 12.6 (3.9 to 28.5)     | 12 (3.8 to 26.9)       | 13.2 (4.2 to 30.1)      | 5.6 (-23.6 to 45.4)     | 0.9 (-27.6 to 39.1)     | 10.6 (-22.6 to 58.6)   |
|                                          |             | DALYs   | 219.1 (106.6 to 398.9)  | 221.7 (107 to 409.1)    | 217 (105.7 to 407.9)    | 254.4 (128.5 to 469.8) | 248 (128.7 to 452.5)   | 261.2 (128 to 484.3)    | 16.1 (-12.4 to 56)      | 11.9 (-15.3 to 50.6)    | 20.3 (-13.9 to 71.2)   |
| High systolic blood pressure             | Deaths      | YLLs    | 183.8 (82.9 to 355.4)   | 180.6 (79.1 to 353.1)   | 187.2 (81.6 to 370.3)   | 207.7 (96.3 to 401.4)  | 193.9 (85 to 371)      | 222.3 (102.2 to 433)    | 13 (-21.1 to 60.2)      | 7.3 (-24.3 to 56.1)     | 18.7 (-20.1 to 78.3)   |
|                                          |             | YLDs    | 35.4 (20.6 to 57.4)     | 41 (23.9 to 66.3)       | 29.8 (17.1 to 49.1)     | 46.7 (27.9 to 75.9)    | 54.1 (32 to 88.2)      | 38.9 (22.6 to 62.6)     | 32.1 (21.9 to 43.1)     | 31.8 (19.2 to 47.1)     | 30.4 (15.9 to 48)      |
|                                          |             | Deaths  | 46.9 (34.1 to 61)       | 49.5 (35.5 to 67.3)     | 44.2 (30.6 to 59.2)     | 35.5 (23.8 to 49.7)    | 34.9 (22.8 to 49.3)    | 36 (23.1 to 52)         | -24.2 (-46.5 to 5.4)    | -29.4 (-53.3 to 3.5)    | -18.5 (-45.3 to 18.3)  |
|                                          |             | DALYs   | 925.2 (706.1 to 1166.4) | 990.4 (738.3 to 1280.2) | 863.9 (626.4 to 1119.1) | 723.1 (510.8 to 965.7) | 721.3 (508.5 to 957)   | 723.9 (490.4 to 1007.1) | -21.8 (-42.9 to 6.4)    | -27.2 (-49.6 to 1.5)    | -16.2 (-43.4 to 20.8)  |
| High temperature                         | Deaths      | YLLs    | 845.9 (633.3 to 1075.2) | 893.3 (660.7 to 1165.5) | 801.4 (568.5 to 1051.9) | 622.9 (427.1 to 853.7) | 602.1 (409.4 to 826.1) | 643.8 (422.5 to 920.1)  | -26.4 (-47.8 to 3.8)    | -32.6 (-55.7 to -2.9)   | -19.7 (-47.6 to 19.9)  |
|                                          |             | YLDs    | 79.3 (55 to 106)        | 97.1 (67 to 132.8)      | 62.5 (42 to 84.8)       | 100.2 (68.5 to 132.3)  | 119.2 (78.8 to 159.4)  | 80.1 (55.4 to 106.3)    | 26.4 (9.7 to 46.5)      | 22.7 (-0.9 to 52.6)     | 28.3 (8.9 to 53.4)     |
|                                          |             | Deaths  | 0.9 (-0.7 to 4.6)       | 0.8 (-0.7 to 4.5)       | 0.9 (-0.7 to 4.7)       | 0.8 (-0.3 to 2.7)      | 0.7 (-0.3 to 2.7)      | 0.8 (-0.3 to 2.9)       | -9.6 (-292.5 to 252.9)  | -13.1 (-278.5 to 240.7) | -5.9 (-311.9 to 263.4) |
|                                          |             | YLLs    | 14.5 (-11.7 to 77.3)    | 14.3 (-11 to 76.9)      | 14.7 (-12 to 79.4)      | 12.4 (-4.5 to 44)      | 11.6 (-4.1 to 42.5)    | 13.3 (-5.1 to 47.4)     | -14.3 (-289.3 to 235.2) | -19.2 (-267.9 to 211.6) | -9.2 (-308.6 to 250.2) |
| Household air pollution from solid fuels | Deaths      | YLLs    | 5.3 (2.5 to 9.5)        | 6.1 (2.9 to 10.6)       | 4.6 (2 to 8.7)          | 0 (0 to 0.1)           | 0.1 (0 to 0.1)         | 0 (0 to 0.1)            | -99.1 (-99.7 to -97.7)  | -99.1 (-99.7 to -97.8)  | -99.2 (-99.7 to -97.7) |
|                                          |             | DALYs   | 113 (53.4 to 200.9)     | 131.7 (63.4 to 227.3)   | 95.1 (41.1 to 183.5)    | 1 (0.3 to 2.3)         | 1.2 (0.4 to 2.7)       | 0.8 (0.3 to 1.9)        | -99.1 (-99.6 to -97.7)  | -99.1 (-99.6 to -97.7)  | -99.1 (-99.7 to -97.6) |
|                                          |             | YLLs    | 102.4 (47.9 to 183.9)   | 117.7 (56.5 to 205.5)   | 87.7 (37.9 to 171.3)    | 0.9 (0.3 to 1.9)       | 1 (0.3 to 2.2)         | 0.7 (0.2 to 1.7)        | -99.2 (-99.7 to -97.8)  | -99.2 (-99.7 to -97.9)  | -99.2 (-99.7 to -97.6) |
|                                          |             | YLDs    | 10.6 (4.9 to 19)        | 13.9 (6.6 to 24.2)      | 7.4 (3.2 to 13.9)       | 0.2 (0.1 to 0.3)       | 0.2 (0.1 to 0.5)       | 0.1 (0 to 0.2)          | -98.6 (-99.4 to -96.5)  | -98.5 (-99.4 to -96.5)  | -98.7 (-99.5 to -96.8) |
| Kidney dysfunction                       | Deaths      | YLLs    | 7.8 (5.1 to 10.8)       | 8.3 (5.4 to 11.8)       | 7.2 (4.7 to 10)         | 8.4 (5 to 12.4)        | 8.2 (4.7 to 12.3)      | 8.7 (5 to 13.1)         | 8.9 (-24.4 to 48.7)     | -1.4 (-32.3 to 37.6)    | 20.6 (-21.8 to 70.3)   |
|                                          |             | DALYs   | 148.2 (111.3 to 192.6)  | 162.5 (118.8 to 215.1)  | 135 (98 to 176.5)       | 169.5 (117.6 to 232.5) | 170.4 (117.8 to 232.5) | 168.6 (112.6 to 236.4)  | 14.4 (-17.3 to 53.7)    | 4.9 (-23.8 to 41.2)     | 24.9 (-14.1 to 73.1)   |
|                                          |             | YLLs    | 134.2 (99.2 to 176.8)   | 144.9 (103.9 to 196.5)  | 124.3 (88.3 to 165)     | 145.5 (96.2 to 203.5)  | 141.6 (93.3 to 196.9)  | 149.8 (95.7 to 213.7)   | 8.4 (-24.9 to 51.8)     | -2.3 (-31.9 to 37.7)    | 20.4 (-20.6 to 72.2)   |
|                                          |             | YLDs    | 14 (9.5 to 19)          | 17.6 (11.9 to 23.8)     | 10.6 (7.2 to 14.6)      | 24 (16.4 to 32.6)      | 28.9 (19.6 to 39)      | 18.9 (12.8 to 25.8)     | 71.5 (57.5 to 86.6)     | 63.8 (49.4 to 80.4)     | 77.4 (57.8 to 99.3)    |
| Lead exposure                            | Deaths      | YLLs    | 5.1 (2.9 to 7.7)        | 4.2 (2.1 to 6.6)        | 6.1 (3.6 to 9)          | 3.4 (1.8 to 5.5)       | 2.6 (1.2 to 4.5)       | 4.3 (2.3 to 6.9)        | -33.2 (-53.4 to -9.6)   | -36.7 (-55.9 to -13.1)  | -29.1 (-52.6 to -0.4)  |
|                                          |             | DALYs   | 102.3 (59.2 to 151.7)   | 83.6 (41.2 to 132.2)    | 120.4 (75.1 to 176.1)   | 60.6 (29.7 to 97.9)    | 46.9 (19.8 to 80.4)    | 75.5 (39.3 to 120.5)    | -40.8 (-59.1 to -20)    | -43.9 (-61.5 to -24.6)  | -37.3 (-57.5 to -12.4) |
|                                          |             | YLLs    | 93.9 (54 to 140.6)      | 75.5 (37.1 to 120.4)    | 111.8 (68.9 to 164.5)   | 53.3 (26.3 to 86.7)    | 39.9 (16.7 to 69.4)    | 67.9 (34.1 to 110.1)    | -43.2 (-61.5 to -21.3)  | -47.2 (-64.9 to -26.1)  | -39.2 (-59.9 to -12.7) |
|                                          |             | YLDs    | 8.4 (4.4 to 13.1)       | 8.1 (3.7 to 13.4)       | 8.6 (5 to 13)           | 7.3 (3.3 to 12.2)      | 7 (2.7 to 12.5)        | 7.6 (3.8 to 12.2)       | -13 (-29.2 to -1.3)     | -13.6 (-34.8 to 0.7)    | -12.2 (-28 to 1.6)     |
| Low physical activity                    | Deaths      | YLLs    | 2.5 (0.4 to 7)          | 2 (0.4 to 5.8)          | 3.1 (0.4 to 9)          | 2.8 (0.5 to 7.7)       | 2.2 (0.4 to 6.4)       | 3.6 (0.5 to 9.9)        | 13.2 (-18.6 to 57.2)    | 8.2 (-25.3 to 58.7)     | 18.1 (-20.7 to 76.9)   |
|                                          |             | DALYs   | 34.1 (5.5 to 98)        | 28.4 (5.4 to 84.8)      | 40.3 (5.5 to 120.4)     | 40.6 (6.1 to 115.4)    | 32.8 (5.6 to 96.7)     | 49.9 (6.8 to 143.1)     | 19.1 (-13 to 59.9)      | 15.5 (-15.8 to 59.5)    | 23.8 (-14.1 to 78.6)   |
|                                          |             | YLLs    | 30.4 (5 to 86.4)        | 24.7 (4.7 to 73.4)      | 36.6 (4.8 to 110.3)     | 35.4 (5.4 to 100.8)    | 27.5 (4.7 to 82.3)     | 44.6 (6.1 to 128.2)     | 16.2 (-19.2 to 60.9)    | 11.2 (-23.5 to 57.4)    | 21.9 (-17.8 to 80.6)   |
|                                          |             | YLDs    | 3.7 (0.5 to 11.9)       | 3.7 (0.6 to 12.3)       | 3.7 (0.4 to 11.2)       | 5.3 (0.7 to 16.2)      | 5.3 (0.8 to 16.9)      | 5.2 (0.6 to 15.4)       | 43.3 (24.5 to 72.8)     | 44.7 (22.7 to 82)       | 42.3 (17.5 to 82.2)    |
| Low temperature                          | Deaths      | YLLs    | 6.1 (1.9 to 11.1)       | 6 (1.8 to 11)           | 6.3 (1.9 to 11.5)       | 4.8 (1.2 to 9)         | 4.5 (1.1 to 8.4)       | 5.1 (1.3 to 9.9)        | -22.1 (-47.5 to 3.2)    | -25.1 (-50.2 to 1.6)    | -18.9 (-47.1 to 11.2)  |
|                                          |             | DALYs   | 103.2 (31.1 to 186)     | 101.7 (30.3 to 185.1)   | 104.9 (31.9 to 192.5)   | 76.3 (19 to 147.7)     | 70.9 (17.2 to 133.9)   | 82.1 (20.4 to 161.4)    | -26.1 (-51 to 0.2)      | -30.3 (-54.3 to -5.3)   | -21.8 (-49.5 to 9.7)   |
|                                          |             | Deaths  | 4.6 (3.2 to 6)          | 5.2 (3.6 to 7)          | 3.9 (2.7 to 5.3)        | 2.8 (1.8 to 4)         | 3 (1.9 to 4.3)         | 2.6 (1.6 to 3.8)        | -38.9 (-56 to -16.1)    | -42.6 (-58.8 to -19.7)  | -34.7 (-55.6 to -4.6)  |
|                                          |             | DALYs   | 98.8 (70.4 to 130.1)    | 119.5 (84.2 to 158.9)   | 78.5 (54.4 to 107)      | 62.1 (41.4 to 87.8)    | 71 (47 to 101.3)       | 52.8 (34.5 to 78.6)     | -37.1 (-53.9 to -14.5)  | -40.6 (-56.6 to -19.1)  | -32.7 (-53.9 to -1.8)  |
| Secondhand smoke                         | Deaths      | YLLs    | 93 (66.5 to 123.4)      | 111.4 (78.1 to 149.9)   | 74.9 (51.4 to 102.2)    | 56 (36.3 to 81.5)      | 62.6 (40.2 to 90.6)    | 49.1 (31.4 to 73.8)     | -39.8 (-57.1 to -15.8)  | -43.9 (-60.7 to -21.3)  | -34.5 (-56.4 to -2.5)  |
|                                          |             | YLDs    | 5.8 (3.8 to 8)          | 8.1 (5.3 to 11.1)       | 3.6 (2.3 to 4.9)        | 6.1 (4 to 8.4)         | 8.4 (5.5 to 11.7)      | 3.7 (2.4 to 5.2)        | 5.3 (-4.3 to 14.6)      | 4 (-7.1 to 15.7)        | 3.6 (-11.6 to 22)      |
|                                          |             | Deaths  | 14.4 (11.4 to 17.7)     | 3.5 (2.4 to 5.1)        | 25 (19.3 to 31)         | 9.3 (6.7 to 12.4)      | 1.8 (1.2 to 2.7)       | 17.7 (12.4 to 23.6)     | -35.2 (-55.7 to -8.2)   | -47.9 (-68 to -16.9)    | -29.4 (-51.8 to 0.2)   |
|                                          |             | DALYs   | 330.4 (262 to 404.4)    | 87.4 (60.1 to 123.6)    | 560.8 (441.4 to 686.8)  | 222.5 (164.3 to 293.1) | 47.8 (32.7 to 67.5)    | 407.9 (298.7 to 539.4)  | -32.7 (-53 to -6.1)     | -45.3 (-65.1 to -13.7)  | -27.3 (-49.6 to 2.5)   |
| Smoking                                  | Deaths      | YLLs    | 302.8 (233.9 to 375.5)  | 77.9 (52.9 to 111.2)    | 516.1 (395 to 639.5)    | 194 (137.5 to 263.7)   | 39.1 (25.6 to 56.9)    | 358.8 (251.3 to 487.3)  | -35.9 (-56.9 to -8.1)   | -49.8 (-69.4 to -20.5)  | -30.5 (-53.8 to 0.4)   |

| Location                    | Risk factor                          | Measure                | 1990                     |                           |                           | 2019                    |                        |                         | % Change (1990 to 2019) |                         |                        |
|-----------------------------|--------------------------------------|------------------------|--------------------------|---------------------------|---------------------------|-------------------------|------------------------|-------------------------|-------------------------|-------------------------|------------------------|
|                             |                                      |                        | Both                     | Female                    | Male                      | Both                    | Female                 | Male                    | Both                    | Female                  | Male                   |
|                             |                                      | YLDs                   | 27.6 (19.7 to 35)        | 9.5 (6.1 to 13.8)         | 44.7 (32 to 58)           | 28.5 (20.6 to 36.4)     | 8.7 (5.6 to 12.5)      | 49.1 (35.4 to 63.2)     | 3.3 (-7.8 to 16)        | -8.1 (-36 to 32.1)      | 9.9 (-0.9 to 23.2)     |
| Turkey                      | All risk factors                     | Deaths                 | 59.4 (46.8 to 78.8)      | 58.6 (43.9 to 75.1)       | 59.7 (47.5 to 90.8)       | 49.9 (39.8 to 61.1)     | 49.2 (38.4 to 60.7)    | 50.1 (39.9 to 62)       | -15.9 (-39.3 to 7.7)    | -16 (-39.5 to 11.2)     | -16 (-46.1 to 14.9)    |
|                             |                                      | DALYs                  | 1263.7 (1058 to 1637.7)  | 1249.9 (1012.3 to 1533.6) | 1271.1 (1029.4 to 1959.3) | 991 (816.3 to 1187.1)   | 956.3 (787 to 1141.2)  | 1020 (827.5 to 1248.5)  | -21.6 (-42.2 to -2.1)   | -23.5 (-41.5 to -4.3)   | -19.8 (-47.7 to 9.2)   |
|                             |                                      | YLLs                   | 1088.1 (888.8 to 1459.4) | 1033 (798.9 to 1294)      | 1140.1 (900.6 to 1832.1)  | 829.3 (662.6 to 1019.9) | 770.2 (606.6 to 948.1) | 885.4 (697.5 to 1107.6) | -23.8 (-46.2 to -1.3)   | -25.4 (-46.8 to -1.8)   | -22.3 (-51.5 to 10.1)  |
|                             | Alcohol use                          | YLDs                   | 175.6 (129.4 to 221.9)   | 216.9 (158.8 to 274.9)    | 130.9 (95.9 to 167.4)     | 161.7 (118.7 to 204.4)  | 186.1 (136.1 to 237.3) | 134.6 (98.3 to 170.7)   | -7.9 (-13.1 to -2.6)    | -14.2 (-20.5 to -7.4)   | 2.8 (-5.2 to 11.3)     |
|                             |                                      | Deaths                 | 0.5 (0.2 to 1)           | 0.1 (-0.2 to 0.5)         | 1 (0.5 to 1.8)            | 0.4 (0.1 to 0.8)        | 0 (-0.2 to 0.4)        | 0.8 (0.4 to 1.4)        | -23.3 (-66.3 to 55.2)   | -59.1 (-636.5 to 331)   | -17.8 (-55.4 to 39)    |
|                             |                                      | DALYs                  | 18.7 (8.7 to 30.7)       | 5.5 (-3.3 to 15.4)        | 32.5 (17 to 53.7)         | 13.8 (6 to 22.7)        | 2.8 (-3.5 to 10.3)     | 25.5 (13.3 to 40.6)     | -26.1 (-59 to 29.8)     | -49.3 (-310.5 to 294.4) | -21.3 (-54.3 to 26.6)  |
|                             | Ambient particulate matter pollution | YLLs                   | 17.6 (8.9 to 28.9)       | 5.7 (-1.7 to 14.4)        | 30 (15.7 to 50.5)         | 12.5 (5.7 to 20.5)      | 3 (-2 to 9.1)          | 22.7 (11.8 to 36.7)     | -28.7 (-60.5 to 23.5)   | -46.9 (-218.4 to 138.4) | -24.4 (-57.6 to 25.3)  |
|                             |                                      | YLDs                   | 1.1 (-0.1 to 2.3)        | -0.2 (-1.9 to 1.5)        | 2.5 (1.1 to 4.1)          | 1.3 (0.1 to 2.7)        | -0.2 (-1.7 to 1.5)     | 2.9 (1.2 to 4.8)        | 16.3 (-151.3 to 249.1)  | 13.2 (-576.3 to 701.8)  | 15.9 (-22.2 to 74.1)   |
|                             |                                      | Deaths                 | 10.6 (7.6 to 14.8)       | 9.9 (6.5 to 13.3)         | 11.4 (8.3 to 17.3)        | 10.3 (7.7 to 13.5)      | 10 (7.4 to 12.9)       | 10.6 (7.9 to 14.1)      | -2.8 (-32.8 to 34.3)    | 1.1 (-28.7 to 47.9)     | -7.1 (-40.1 to 33.9)   |
|                             | Diet high in red meat                | DALYs                  | 260.5 (190.6 to 348)     | 243.8 (168.1 to 320)      | 277.4 (202.5 to 424.6)    | 236.5 (182 to 300.9)    | 224.5 (172.9 to 283.2) | 247.6 (188.1 to 321.8)  | -9.2 (-34.9 to 22.8)    | -7.9 (-32.6 to 30.4)    | -10.8 (-41.9 to 27.4)  |
|                             |                                      | YLLs                   | 222.1 (161.8 to 302.2)   | 197.8 (132.4 to 267.2)    | 247.2 (177.1 to 397)      | 194.3 (146 to 255.2)    | 175.8 (130.4 to 227)   | 212.6 (156.1 to 285.1)  | -12.5 (-40.2 to 22)     | -11.1 (-38.5 to 29.1)   | -14 (-46.3 to 27.7)    |
|                             |                                      | YLDs                   | 38.4 (25.1 to 52.2)      | 46 (29.8 to 63.4)         | 30.3 (20.2 to 40.8)       | 42.1 (29.4 to 55.5)     | 48.7 (34 to 64.4)      | 35 (24.4 to 46)         | 9.8 (-5.7 to 39.8)      | 5.9 (-10.9 to 38.3)     | 15.6 (-1.3 to 43.6)    |
|                             | Diet high in sodium                  | Deaths                 | 2.2 (0.8 to 3.5)         | 2.1 (0.7 to 3.5)          | 2.3 (0.8 to 3.8)          | 1.7 (0.6 to 2.8)        | 1.6 (0.6 to 2.7)       | 1.8 (0.7 to 3)          | -22.8 (-45.9 to 4.7)    | -24.1 (-49.2 to 6.4)    | -21.7 (-50.2 to 11.8)  |
|                             |                                      | DALYs                  | 59.7 (21.2 to 93.5)      | 58.4 (20.2 to 92.8)       | 60.9 (20.8 to 99.2)       | 43.3 (16.1 to 68.8)     | 40.4 (15.2 to 64.6)    | 46 (17.5 to 74.1)       | -27.6 (-47.8 to -6.2)   | -30.8 (-50.1 to -8.8)   | -24.5 (-51 to 4.6)     |
|                             |                                      | YLLs                   | 50.3 (17.1 to 80.3)      | 46.7 (15.8 to 76.6)       | 53.9 (18 to 89.5)         | 34.9 (12.8 to 56.5)     | 30.7 (11.3 to 50.4)    | 39.1 (14.5 to 64)       | -30.7 (-52.6 to -5.2)   | -34.2 (-55.4 to -8)     | -27.6 (-54.9 to 5)     |
|                             | Diet low in fiber                    | YLDs                   | 9.4 (3.2 to 15.4)        | 11.7 (4 to 19.2)          | 7 (2.3 to 11.5)           | 8.4 (2.7 to 13.7)       | 9.7 (3.1 to 16)        | 6.9 (2.3 to 11.4)       | -10.9 (-19.5 to -1.5)   | -16.9 (-28.3 to -4.4)   | -0.6 (-12.6 to 13)     |
|                             |                                      | Deaths                 | 0.8 (0.2 to 3.7)         | 0.6 (0.2 to 2.4)          | 1.1 (0.1 to 5)            | 0.7 (0.2 to 2.8)        | 0.5 (0.2 to 1.8)       | 0.9 (0.1 to 4.1)        | -21.2 (-54.8 to 42.4)   | -21.5 (-60.7 to 61.4)   | -20.8 (-61.7 to 76.7)  |
|                             |                                      | DALYs                  | 20.4 (4.1 to 88)         | 14.3 (4.3 to 58.9)        | 26.8 (2.9 to 121)         | 15.2 (3.2 to 65)        | 10.2 (3.4 to 38.9)     | 20.5 (2.4 to 94.3)      | -25.5 (-57.5 to 36.6)   | -28.5 (-64.2 to 55.3)   | -23.4 (-63.9 to 77)    |
|                             | Diet low in fruits                   | YLLs                   | 17.8 (3.5 to 76.9)       | 11.8 (3.5 to 48.4)        | 24.1 (2.6 to 108.9)       | 12.8 (2.6 to 55)        | 8.2 (2.6 to 31.2)      | 17.8 (2 to 82.9)        | -27.9 (-59.7 to 35.2)   | -30.5 (-66.7 to 50.5)   | -26.2 (-65.9 to 75.7)  |
|                             |                                      | YLDs                   | 2.6 (0.5 to 10.8)        | 2.5 (0.7 to 10)           | 2.7 (0.3 to 12.1)         | 2.4 (0.5 to 10.1)       | 2 (0.6 to 7.9)         | 2.7 (0.3 to 12.6)       | -8.6 (-46.9 to 55.5)    | -18.9 (-57.3 to 74.7)   | 1.6 (-48.4 to 101.1)   |
|                             |                                      | Deaths                 | 0.4 (0.2 to 0.7)         | 0.3 (0.1 to 0.7)          | 0.4 (0.2 to 0.8)          | 0.3 (0.1 to 0.6)        | 0.3 (0.1 to 0.7)       | 0.3 (0.1 to 0.6)        | -15.5 (-43.5 to 28)     | -10 (-48.7 to 58.1)     | -22.2 (-53.9 to 27.5)  |
|                             | Diet low in vegetables               | DALYs                  | 7.2 (3.2 to 15.5)        | 6.8 (3.1 to 14.2)         | 7.5 (3.3 to 17.7)         | 5.6 (2.5 to 11.5)       | 5.4 (2.5 to 11.1)      | 5.7 (2.5 to 12.1)       | -22.4 (-44.4 to 7.3)    | -21 (-46.8 to 15.3)     | -24.3 (-52.5 to 12.5)  |
|                             |                                      | YLLs                   | 6.1 (2.7 to 13.2)        | 5.5 (2.5 to 11.6)         | 6.7 (2.9 to 15.5)         | 4.6 (2.1 to 9.4)        | 4.3 (1.9 to 8.9)       | 4.9 (2.2 to 10.5)       | -24.8 (-48.4 to 7.4)    | -23.1 (-50 to 17.6)     | -27 (-57 to 12.5)      |
|                             |                                      | YLDs                   | 1.1 (0.4 to 2.3)         | 1.3 (0.5 to 2.7)          | 0.9 (0.3 to 2)            | 1 (0.4 to 2.1)          | 1.1 (0.5 to 2.4)       | 0.8 (0.3 to 1.9)        | -8.7 (-24.9 to 14)      | -11.8 (-34.1 to 18.1)   | -4.3 (-29.4 to 29)     |
|                             | Diet low in whole grains             | Deaths                 | 1.4 (0.8 to 2.3)         | 1.5 (0.8 to 2.5)          | 1.3 (0.7 to 2.3)          | 0.6 (0.3 to 1)          | 0.6 (0.3 to 1.1)       | 0.5 (0.2 to 0.9)        | -61 (-76.3 to -39)      | -60 (-79 to -30.2)      | -62.5 (-80.1 to -32.8) |
|                             |                                      | DALYs                  | 38.6 (20.5 to 60.4)      | 40.9 (21.7 to 64.9)       | 36 (18.8 to 58.2)         | 13.8 (7.4 to 22.9)      | 14.6 (7.7 to 24.9)     | 12.8 (6.2 to 21.1)      | -64.1 (-75.5 to -49.2)  | -64.2 (-77 to -45.9)    | -64.4 (-79.5 to -44.4) |
|                             |                                      | YLLs                   | 32.7 (17.8 to 52.3)      | 33.1 (17.9 to 52.9)       | 32 (16.5 to 52.5)         | 11 (5.8 to 18.1)        | 11 (5.6 to 19.2)       | 10.8 (5.2 to 18.5)      | -66.3 (-77.7 to -50.3)  | -66.7 (-79.9 to -46.5)  | -66.2 (-81.5 to -45)   |
|                             | High body-mass index                 | YLDs                   | 5.9 (2.4 to 10.3)        | 7.7 (3.2 to 13.3)         | 4 (1.7 to 7)              | 2.8 (1.2 to 4.9)        | 3.6 (1.5 to 6.7)       | 2 (0.9 to 3.8)          | -52.4 (-64.5 to -39.7)  | -53.6 (-68.2 to -37.6)  | -49.9 (-65.9 to -31.3) |
|                             |                                      | Deaths                 | 0.2 (0.1 to 0.2)         | 0.2 (0.1 to 0.2)          | 0.2 (0.1 to 0.3)          | 0.1 (0.1 to 0.2)        | 0.1 (0.1 to 0.2)       | 0.1 (0.1 to 0.2)        | -23.3 (-48.4 to 4.9)    | -21.5 (-49.3 to 10.8)   | -25.9 (-55.5 to 8.5)   |
|                             |                                      | DALYs                  | 3.1 (2.6 to 4.1)         | 3.1 (2.5 to 4)            | 3.2 (2.5 to 4.8)          | 2.4 (1.9 to 2.8)        | 2.3 (1.9 to 2.8)       | 2.4 (1.9 to 2.9)        | -25.1 (-44.8 to -4.3)   | -25.6 (-46 to -4.1)     | -25 (-52.4 to 4.6)     |
| High fasting plasma glucose | YLLs                                 | 2.7 (2.2 to 3.7)       | 2.6 (2 to 3.4)           | 2.9 (2.2 to 4.5)          | 2 (1.6 to 2.4)            | 1.9 (1.5 to 2.3)        | 2.1 (1.7 to 2.6)       | -27.2 (-48.3 to -3.1)   | -27.4 (-50.2 to -1.2)   | -27.4 (-55.4 to 5.9)    |                        |
|                             | YLDs                                 | 0.4 (0.3 to 0.5)       | 0.5 (0.4 to 0.7)         | 0.3 (0.2 to 0.4)          | 0.4 (0.3 to 0.5)          | 0.4 (0.3 to 0.5)        | 0.3 (0.2 to 0.4)       | -12.1 (-22.5 to -4.9)   | -16.8 (-26.9 to -8.8)   | -4.5 (-20.2 to 7.5)     |                        |
|                             | Deaths                               | 3.3 (2 to 4.7)         | 3.3 (1.9 to 4.7)         | 3.3 (1.9 to 5)            | 3.1 (1.9 to 4.4)          | 3.2 (1.9 to 4.4)        | 3.1 (1.8 to 4.3)       | -4.7 (-34 to 24.8)      | -3 (-32.3 to 34.9)      | -6.9 (-44.5 to 30.8)    |                        |
| High LDL cholesterol        | DALYs                                | 66.3 (36.7 to 92.6)    | 67.5 (37.4 to 96.1)      | 64.8 (35.8 to 99.4)       | 60 (34.1 to 82.5)         | 60.5 (34.3 to 82.8)     | 59.1 (32.8 to 82)      | -9.5 (-33.7 to 11.7)    | -10.4 (-31.2 to 12.2)   | -8.9 (-43.8 to 22.9)    |                        |
|                             | YLLs                                 | 50.6 (28.5 to 74.6)    | 48.2 (27 to 70)          | 53 (29.2 to 86.6)         | 45.2 (25.9 to 64.6)       | 43.3 (24.9 to 61.5)     | 46.9 (26 to 67.9)      | -10.6 (-40.4 to 17.6)   | -10 (-37 to 24.4)       | -11.4 (-50.4 to 28.2)   |                        |
|                             | YLDs                                 | 15.7 (8.1 to 22.8)     | 19.3 (10 to 28)          | 11.9 (6 to 17.5)          | 14.8 (7.7 to 21.5)        | 17.2 (8.9 to 25.3)      | 12.2 (6.3 to 17.7)     | -6.1 (-12.3 to 0.7)     | -11.1 (-19.1 to -2.4)   | 2.6 (-7.7 to 13.9)      |                        |
| High body-mass index        | Deaths                               | 14.8 (8.7 to 22)       | 16.3 (10 to 23.8)        | 12.9 (7 to 21.5)          | 14.1 (8.6 to 20.7)        | 14 (8.7 to 20.5)        | 14 (8.2 to 20.9)       | -4.3 (-33.3 to 28.6)    | -13.7 (-38.4 to 17.2)   | 8 (-35.1 to 64.1)       |                        |
|                             | DALYs                                | 464 (299.2 to 658)     | 519.2 (347.5 to 706.5)   | 403.5 (233.3 to 645.4)    | 413 (275.9 to 564.1)      | 409.8 (283.7 to 547.1)  | 412.4 (262.4 to 586.4) | -11 (-35.2 to 14.4)     | -21.1 (-39.2 to 0.2)    | 2.2 (-36 to 49.2)       |                        |
|                             | YLLs                                 | 392.2 (245.7 to 559)   | 419.2 (275.8 to 591.7)   | 360.9 (204.6 to 591.6)    | 334.5 (216.2 to 470.8)    | 313.6 (208.3 to 436)    | 352.7 (217 to 512.4)   | -14.7 (-41.3 to 14.3)   | -25.2 (-46.9 to 0.6)    | -2.3 (-41.4 to 48)      |                        |
| High fasting plasma glucose | YLDs                                 | 71.9 (44.5 to 106)     | 100.1 (62.9 to 142.8)    | 42.6 (23.3 to 66.9)       | 78.5 (50.1 to 110.6)      | 96.3 (62.6 to 133.7)    | 59.7 (35.8 to 85.9)    | 9.2 (-1.6 to 23.9)      | -3.8 (-13.5 to 9.3)     | 40.1 (17.2 to 81.3)     |                        |
|                             | Deaths                               | 10.5 (6.2 to 19.3)     | 11 (6.1 to 21.6)         | 9.9 (5.9 to 17.7)         | 14.4 (7.7 to 26.7)        | 14.3 (7.4 to 27.2)      | 14.4 (7.5 to 27.5)     | 37.4 (-10.7 to 99.2)    | 31 (-17.8 to 107.2)     | 46.6 (-14 to 122.1)     |                        |
|                             | DALYs                                | 206.4 (132.6 to 344.3) | 214.1 (135.1 to 356.8)   | 195.8 (122.9 to 330.1)    | 259 (153.1 to 425.8)      | 255.5 (147.4 to 418.4)  | 261.1 (154.4 to 447.9) | 25.4 (-15.5 to 76.3)    | 19.4 (-20.8 to 77)      | 33.3 (-18.1 to 103.3)   |                        |
| High LDL cholesterol        | YLLs                                 | 178.3 (113.5 to 298.4) | 178.6 (108.8 to 299.4)   | 175.9 (109.7 to 297.4)    | 220.3 (127.8 to 364)      | 211.1 (119.1 to 356.4)  | 229 (130.5 to 391.5)   | 23.6 (-19.6 to 78.1)    | 18.2 (-25.3 to 82.5)    | 30.2 (-23.4 to 102.2)   |                        |
|                             | YLDs                                 | 28.2 (16.6 to 46)      | 35.5 (20.3 to 58.2)      | 20 (11.7 to 31.9)         | 38.7 (21.6 to 65.5)       | 44.4 (24.7 to 74.9)     | 32.1 (17.6 to 56.5)    | 37.4 (10.3 to 76.7)     | 25.2 (-3.5 to 71.1)     | 60.8 (22.9 to 121.7)    |                        |
|                             | Deaths                               | 7.7 (2.4 to 17.5)      | 7.9 (2.2 to 18.2)        | 7.3 (2.4 to 16.2)         | 6.6 (1.8 to 15.8)         | 7.1 (1.9 to 17.1)       | 5.9 (1.8 to 13.2)      | -13.7 (-43.1 to 12.3)   | -9.7 (-39 to 23.3)      | -19.3 (-51.7 to 11.5)   |                        |
| High LDL cholesterol        | DALYs                                | 164.3 (86.1 to 289.7)  | 172.2 (89.5 to 314.5)    | 154.5 (79.1 to 282.4)     | 133.3 (65.4 to 251.6)     | 142.7 (68.8 to 277.6)   | 121.4 (61.5 to 224.7)  | -18.9 (-41.5 to 0.4)    | -17.2 (-36.6 to 3)      | -21.4 (-51.1 to 4.8)    |                        |
|                             | YLLs                                 | 121.8 (55.4 to 228.4)  | 118.6 (51.7 to 242.1)    | 123.8 (58.7 to 237.3)     | 96.7 (40.7 to 196.6)      | 97.8 (37.5 to 208.8)    | 93.6 (42.2 to 183.1)   | -20.6 (-48.3 to 4.8)    | -17.5 (-46.2 to 13.7)   | -24.4 (-57.3 to 9.7)    |                        |
|                             | YLDs                                 | 42.5 (25.4 to 69.1)    | 53.7 (32.2 to 86.1)      | 30.7 (18.3 to 50.5)       | 36.6 (21.6 to 59.5)       | 44.8 (26.7 to 74.6)     | 27.8 (16.3 to 45.3)    | -13.9 (-21.2 to -6.4)   | -16.5 (-25.6 to -7)     | -9.4 (-20.7 to 2.3)     |                        |



| Location             | Risk factor                              | Measure              | 1990                      |                           |                          | 2019                      |                           |                           | % Change (1990 to 2019) |                           |                         |
|----------------------|------------------------------------------|----------------------|---------------------------|---------------------------|--------------------------|---------------------------|---------------------------|---------------------------|-------------------------|---------------------------|-------------------------|
|                      |                                          |                      | Both                      | Female                    | Male                     | Both                      | Female                    | Male                      | Both                    | Female                    | Male                    |
|                      | High systolic blood pressure             | Deaths               | 37 (27.9 to 50.1)         | 38.2 (27.3 to 51.2)       | 35.2 (25.5 to 52.1)      | 29.8 (22 to 38.6)         | 30.3 (22 to 40.1)         | 28.7 (21.2 to 37.5)       | -19.5 (-41.7 to 3.7)    | -20.7 (-42.9 to 8.5)      | -18.3 (-47.3 to 15)     |
|                      |                                          | DALYs                | 807.5 (636.1 to 1066.8)   | 824.9 (628 to 1064.3)     | 780.1 (595.4 to 1214.6)  | 614.5 (476.4 to 763.7)    | 602.8 (466.9 to 758.1)    | 618.3 (467.7 to 783.5)    | -23.9 (-44.4 to -4.9)   | -26.9 (-44.8 to -5.4)     | -20.7 (-48.4 to 9.6)    |
|                      |                                          | YLLs                 | 695.8 (540.5 to 965.6)    | 683.3 (503.2 to 905.6)    | 701.1 (521.1 to 1132.9)  | 515.2 (389.9 to 653.9)    | 487.7 (360.9 to 626.1)    | 537.1 (395 to 693.6)      | -26 (-48.2 to -4)       | -28.6 (-49.1 to -3.3)     | -23.4 (-52 to 10.6)     |
|                      |                                          | YLDs                 | 111.7 (77.5 to 145.7)     | 141.5 (97.7 to 185.6)     | 79 (55.3 to 105.3)       | 99.3 (69.5 to 131)        | 115.1 (79.3 to 153.5)     | 81.2 (57.2 to 107.7)      | -11.1 (-19.4 to -1.5)   | -18.7 (-29.1 to -7.2)     | 2.8 (-9.7 to 16.8)      |
|                      | High temperature                         | Deaths               | 0 (-0.1 to 0.1)           | 0 (-0.1 to 0.1)           | 0 (-0.1 to 0.1)          | 0 (-0.1 to 0.1)           | 0 (-0.1 to 0.1)           | 0 (-0.1 to 0.1)           | 51.1 (-363.7 to 270.1)  | 52.1 (-361.6 to 288)      | 49.4 (-355.6 to 281.5)  |
|                      |                                          | YLLs                 | 0.2 (-1 to 1.5)           | 0.2 (-1 to 1.4)           | 0.2 (-1.1 to 1.6)        | 0.3 (-0.9 to 1.7)         | 0.3 (-0.9 to 1.6)         | 0.3 (-1 to 1.8)           | 34.5 (-322.8 to 234.2)  | 32.4 (-322.4 to 233.7)    | 36 (-328.8 to 250.3)    |
|                      | Household air pollution from solid fuels | Deaths               | 3.6 (1.8 to 6.6)          | 4.1 (2 to 7.1)            | 3.1 (1.3 to 6.3)         | 0.1 (0 to 0.2)            | 0.1 (0 to 0.2)            | 0 (0 to 0.1)              | -98.3 (-99.4 to -95.8)  | -98.3 (-99.4 to -95.6)    | -98.4 (-99.5 to -95.8)  |
|                      |                                          | DALYs                | 88.6 (44.6 to 159.2)      | 100.3 (51 to 175.6)       | 75.2 (33 to 148)         | 1.4 (0.4 to 3.6)          | 1.6 (0.5 to 3.9)          | 1.1 (0.3 to 3)            | -98.4 (-99.4 to -96.1)  | -98.4 (-99.5 to -96)      | -98.5 (-99.5 to -96)    |
|                      |                                          | YLLs                 | 74.9 (36.7 to 136.3)      | 81.4 (41.2 to 143.2)      | 67 (29.1 to 133.4)       | 1.1 (0.4 to 2.9)          | 1.2 (0.4 to 3)            | 1 (0.3 to 2.5)            | -98.5 (-99.5 to -96.3)  | -98.5 (-99.5 to -96.1)    | -98.5 (-99.5 to -96.1)  |
|                      | Kidney dysfunction                       | YLDs                 | 13.7 (6.4 to 24.7)        | 18.9 (9.1 to 32.6)        | 8.2 (3.5 to 15.7)        | 0.3 (0.1 to 0.7)          | 0.3 (0.1 to 0.9)          | 0.2 (0 to 0.4)            | -98.1 (-99.3 to -95.5)  | -98.2 (-99.3 to -95.6)    | -98 (-99.3 to -95.1)    |
|                      |                                          | Deaths               | 4.8 (3.2 to 6.8)          | 4.9 (3.2 to 6.9)          | 4.6 (3.1 to 7.2)         | 6.1 (3.7 to 8.7)          | 6.1 (3.6 to 9)            | 6 (3.7 to 8.5)            | 27.6 (-13.1 to 68.5)    | 24.5 (-16.5 to 74)        | 31.5 (-18.9 to 84.1)    |
|                      |                                          | DALYs                | 102.6 (78.3 to 138.2)     | 106.8 (78.6 to 140.2)     | 97.4 (72.5 to 153)       | 121.6 (86.7 to 160.1)     | 121.2 (85.5 to 161)       | 121.1 (87.1 to 159.7)     | 18.5 (-14.6 to 52)      | 13.5 (-16.5 to 49)        | 24.4 (-19.5 to 70.2)    |
|                      |                                          | YLLs                 | 86.6 (64.1 to 119)        | 86.4 (60.6 to 117.8)      | 86.3 (62.6 to 140.7)     | 100.7 (70.7 to 135.9)     | 96.9 (65.6 to 132.2)      | 104.3 (73.1 to 139.2)     | 16.3 (-20.6 to 55.7)    | 12.2 (-23.5 to 56.6)      | 20.8 (-26.5 to 72.6)    |
|                      | Lead exposure                            | YLDs                 | 15.9 (10.9 to 21.4)       | 20.4 (14 to 27.4)         | 11.1 (7.6 to 14.9)       | 20.8 (14 to 28.4)         | 24.4 (16.4 to 33.2)       | 16.9 (11.4 to 22.8)       | 30.8 (17.9 to 43.8)     | 19.3 (6.3 to 32.8)        | 52.7 (34.1 to 72.5)     |
|                      |                                          | Deaths               | 1.9 (0.7 to 3.4)          | 1.7 (0.5 to 3.2)          | 2.2 (0.8 to 3.7)         | 1.3 (0.4 to 2.5)          | 1.1 (0.3 to 2.2)          | 1.5 (0.5 to 2.8)          | -31.3 (-53.6 to -11.7)  | -32.2 (-54.4 to -7.5)     | -30 (-56 to -2.4)       |
|                      |                                          | DALYs                | 40.8 (12.9 to 75.2)       | 34.9 (8.3 to 67.3)        | 47 (16.1 to 83.6)        | 22.7 (5.5 to 45.3)        | 18.6 (3.4 to 39.4)        | 27.2 (7.8 to 52.1)        | -44.4 (-64.6 to -27.8)  | -46.5 (-66.9 to -29.7)    | -42.2 (-64.7 to -20.4)  |
|                      |                                          | YLLs                 | 35.6 (11.2 to 65.3)       | 29.1 (6.9 to 56.1)        | 42.4 (14.4 to 75.5)      | 19.6 (4.9 to 39.3)        | 15.6 (2.9 to 32.9)        | 24 (7 to 46.3)            | -45 (-65.4 to -26.6)    | -46.2 (-66.9 to -26.6)    | -43.4 (-67 to -19.5)    |
|                      | Low physical activity                    | YLDs                 | 5.2 (1.4 to 10.1)         | 5.8 (1.2 to 11.7)         | 4.6 (1.5 to 8.4)         | 3.1 (0.6 to 6.8)          | 3 (0.4 to 7.1)            | 3.2 (0.8 to 6.5)          | -40.5 (-62.1 to -29.8)  | -47.8 (-72.2 to -36)      | -30.7 (-53.9 to -18)    |
|                      |                                          | Deaths               | 2.9 (0.6 to 6.8)          | 2.8 (0.6 to 6.5)          | 3.1 (0.6 to 7)           | 3.2 (0.7 to 7)            | 3.2 (0.7 to 6.8)          | 3.2 (0.6 to 7.1)          | 8.4 (-23.7 to 50.9)     | 12.7 (-21.8 to 73.1)      | 3 (-33.2 to 52)         |
|                      |                                          | DALYs                | 43.7 (8.1 to 106.5)       | 43 (8.3 to 104.6)         | 44.6 (7.7 to 109.1)      | 46.4 (9.1 to 110.3)       | 46.3 (10.6 to 109.5)      | 46.2 (8.6 to 111)         | 6.1 (-24 to 42.7)       | 7.8 (-20.2 to 52.3)       | 3.6 (-32.4 to 47.1)     |
|                      |                                          | YLLs                 | 35.6 (6.6 to 85.3)        | 33.4 (6.7 to 81.1)        | 38.1 (6.5 to 93.8)       | 37.6 (7.6 to 88.9)        | 36.5 (8.1 to 84)          | 38.7 (7.2 to 90.8)        | 5.7 (-28.8 to 49.4)     | 9.1 (-25.1 to 66.8)       | 1.7 (-36.6 to 53.2)     |
|                      | Low temperature                          | YLDs                 | 8.1 (1.4 to 21.9)         | 9.5 (1.7 to 25.7)         | 6.5 (1 to 17.4)          | 8.7 (1.6 to 22.7)         | 9.8 (1.9 to 25.4)         | 7.5 (1.2 to 19.9)         | 7.6 (-7.1 to 28.6)      | 3 (-11.9 to 27.2)         | 14.8 (-3.2 to 40.3)     |
|                      |                                          | Deaths               | 8.5 (5.8 to 11.8)         | 8.4 (5.8 to 11.8)         | 8.6 (5.8 to 12.6)        | 6.7 (4.6 to 9)            | 6.6 (4.5 to 9)            | 6.6 (4.6 to 9)            | -22 (-43.7 to 0.1)      | -21.8 (-43.1 to 2.9)      | -22.4 (-49.2 to 6.2)    |
|                      | Secondhand smoke                         | YLLs                 | 154.1 (106.3 to 212.6)    | 147.4 (101.5 to 204)      | 160.4 (109.4 to 250)     | 106.6 (72.6 to 145.2)     | 100 (68.1 to 136.3)       | 112.8 (76.3 to 155)       | -30.8 (-50.9 to -11.1)  | -32.2 (-50.4 to -11.8)    | -29.7 (-55.1 to -1.2)   |
| Deaths               |                                          | 3.3 (2.3 to 4.5)     | 4 (2.7 to 5.4)            | 2.5 (1.7 to 3.9)          | 1.9 (1.3 to 2.5)         | 2.1 (1.5 to 2.8)          | 1.6 (1.1 to 2.2)          | -43.8 (-59.5 to -26.2)    | -47.3 (-63.4 to -29.8)  | -38 (-61.7 to -12.1)      |                         |
| DALYs                |                                          | 76.1 (54.4 to 101.1) | 94.9 (68.3 to 125.7)      | 55.9 (37.4 to 83.4)       | 40.8 (29 to 54.9)        | 46.7 (33.1 to 61.4)       | 34.3 (23 to 48.1)         | -46.4 (-60 to -30.8)      | -50.8 (-63.7 to -36.5)  | -38.7 (-61.8 to -14.8)    |                         |
| YLLs                 |                                          | 68.4 (48.3 to 90.9)  | 83.3 (58.8 to 112)        | 52.3 (35 to 80.7)         | 35.9 (24.9 to 48.9)      | 39.8 (27.6 to 54.1)       | 31.4 (20.8 to 44.4)       | -47.6 (-62 to -30.7)      | -52.2 (-66.2 to -36.2)  | -40 (-63.6 to -14.9)      |                         |
| Smoking              | YLDs                                     | 7.7 (5 to 10.6)      | 11.7 (7.6 to 16)          | 3.5 (2.3 to 4.9)          | 4.9 (3.2 to 6.9)         | 6.9 (4.5 to 9.8)          | 2.9 (1.9 to 4.1)          | -35.6 (-41.1 to -29.6)    | -40.4 (-46.1 to -33.7)  | -18.9 (-31.1 to -5.4)     |                         |
|                      | Deaths                                   | 12.3 (9.9 to 17.9)   | 6.6 (4.7 to 9)            | 19 (14.8 to 29.8)         | 7.4 (5.9 to 9.2)         | 3.8 (2.9 to 4.8)          | 11.7 (9.2 to 14.8)        | -39.8 (-59.9 to -18.7)    | -42.8 (-61.4 to -16.5)  | -38.2 (-61.4 to -11.7)    |                         |
|                      | DALYs                                    | 360.6 (294 to 504.2) | 224.7 (169.8 to 291.5)    | 509 (402.9 to 789.4)      | 215.4 (175.1 to 260.6)   | 127.8 (100 to 161.1)      | 312.8 (249.5 to 385.2)    | -40.3 (-59 to -21.3)      | -43.1 (-58.2 to -23.2)  | -38.5 (-61.3 to -14.6)    |                         |
|                      | YLLs                                     | 310.2 (250 to 452.4) | 177.9 (131.5 to 238.4)    | 454.1 (349.6 to 734.8)    | 176.9 (139.9 to 221.6)   | 94.9 (71.8 to 124)        | 267.7 (207.7 to 340.9)    | -43 (-63 to -21.7)        | -46.7 (-63.4 to -23.8)  | -41 (-64.1 to -14.3)      |                         |
| United Arab Emirates | All risk factors                         | YLDs                 | 50.4 (36.3 to 64.4)       | 46.7 (32.1 to 62)         | 54.9 (39.6 to 70.6)      | 38.5 (27.6 to 49.4)       | 32.9 (22.8 to 43.7)       | 45.1 (32.4 to 57.9)       | -23.5 (-31.9 to -14.4)  | -29.6 (-43 to -13.4)      | -17.9 (-26 to -9.1)     |
|                      |                                          | Deaths               | 159.1 (125.3 to 220.2)    | 169.7 (129.4 to 228.9)    | 152.5 (110.7 to 213.6)   | 79.2 (59.8 to 103.4)      | 76.9 (58.5 to 102.4)      | 80.3 (59 to 105.4)        | -50.2 (-62.3 to -35.4)  | -54.6 (-66.2 to -37)      | -47.3 (-61.8 to -26.6)  |
|                      |                                          | DALYs                | 3155.9 (2501.8 to 4229.8) | 3385.5 (2661.6 to 4488.6) | 3050.5 (2259 to 4213.7)  | 1719.6 (1350.3 to 2192.7) | 1739.9 (1392.7 to 2175)   | 1717.7 (1304.2 to 2220.6) | -45.5 (-58.5 to -29.9)  | -48.6 (-60.8 to -31)      | -43.7 (-59.1 to -22.8)  |
|                      |                                          | YLLs                 | 2822.9 (2184.7 to 3920.6) | 2980.4 (2277.7 to 4025.4) | 2758 (1966.7 to 3903.6)  | 1422.4 (1057.8 to 1910.2) | 1364.1 (1037.5 to 1792.5) | 1450.7 (1035.6 to 1952.3) | -49.6 (-63.2 to -32.4)  | -54.2 (-67 to -35)        | -47.4 (-63.1 to -24.5)  |
|                      | Alcohol use                              | YLDs                 | 333 (242.7 to 424.7)      | 405.2 (296.6 to 518.7)    | 292.6 (213.1 to 374.1)   | 297.2 (218.7 to 377.1)    | 375.8 (277.2 to 476.3)    | 267.1 (194.6 to 342)      | -10.8 (-15.8 to -6.1)   | -7.2 (-13.4 to -0.8)      | -8.7 (-15.3 to -2)      |
|                      |                                          | Deaths               | 3.4 (1.6 to 5.7)          | 0.1 (-1.1 to 1.3)         | 5.6 (2.8 to 9.5)         | 0.3 (-0.4 to 1)           | -0.4 (-0.8 to 0)          | 0.5 (-0.4 to 1.6)         | -91.6 (-119.8 to -72.4) | -835.8 (-1088.1 to 994.9) | -90.4 (-110.4 to -75.1) |
|                      |                                          | DALYs                | 97.9 (51.4 to 160.5)      | 12.3 (-17.1 to 47.3)      | 147 (79.6 to 240.7)      | 12.1 (-4.9 to 31.8)       | -10.1 (-19.7 to 0.2)      | 19.7 (-3.3 to 46.6)       | -87.6 (-108.7 to -68.6) | -182.3 (-1160.8 to 903)   | -86.6 (-103.2 to -70.4) |
|                      |                                          | YLLs                 | 91.5 (48.2 to 152.7)      | 13.7 (-13 to 43.9)        | 136.3 (72.8 to 224.6)    | 11.5 (-3 to 28.8)         | -6.8 (-14.9 to 0.9)       | 17.7 (-1.7 to 40.8)       | -87.4 (-104.8 to -69.1) | -149.9 (-1031.3 to 684)   | -87 (-101.6 to -70.9)   |
|                      | Ambient particulate matter pollution     | YLDs                 | 6.4 (2.3 to 11.3)         | -1.4 (-5.1 to 2.3)        | 10.7 (4.7 to 17.5)       | 0.6 (-2.4 to 3.9)         | -3.3 (-6 to -0.7)         | 2 (-1.9 to 6.3)           | -90.4 (-184.9 to -53.5) | 124.8 (-1198.6 to 1650.2) | -81.7 (-130.6 to -53.4) |
|                      |                                          | Deaths               | 46.7 (34 to 69.4)         | 49.6 (35.7 to 70.2)       | 45.1 (30.5 to 67.3)      | 23.5 (16.3 to 32.9)       | 22.8 (16.4 to 31.5)       | 23.9 (15.9 to 34.1)       | -49.6 (-62.2 to -33.6)  | -54.1 (-66.4 to -36.1)    | -46.9 (-61.8 to -24.8)  |
|                      |                                          | DALYs                | 1038.6 (763.5 to 1456.5)  | 1123.9 (824 to 1554.3)    | 1004.4 (697.8 to 1484.9) | 581.5 (421.7 to 780.3)    | 594.6 (440.2 to 783.5)    | 579.5 (406.7 to 794.7)    | -44 (-58 to -26.5)      | -47.1 (-60.4 to -28)      | -42.3 (-58.7 to -19.5)  |
|                      | Diet high in red meat                    | YLLs                 | 923.6 (660.1 to 1331)     | 982.2 (708.8 to 1379.3)   | 903.1 (604 to 1373.5)    | 477 (328.3 to 674.5)      | 460.7 (326.2 to 632.8)    | 485.5 (322.2 to 693)      | -48.4 (-62.8 to -28.9)  | -53.1 (-66.4 to -32.2)    | -46.2 (-63 to -21.2)    |
|                      |                                          | YLDs                 | 115 (81.7 to 154.1)       | 141.7 (100.7 to 189.4)    | 101.3 (71.8 to 136.2)    | 104.5 (74.2 to 139.7)     | 133.9 (95.2 to 180.5)     | 94 (67.4 to 126.5)        | -9.1 (-15 to -3.6)      | -5.5 (-12.4 to 1.9)       | -7.2 (-14.6 to 0.2)     |
|                      |                                          | Deaths               | 14.1 (8.3 to 20.9)        | 14.9 (8.6 to 22.5)        | 13.7 (7.7 to 20.8)       | 4.1 (1.7 to 6.4)          | 3.9 (1.6 to 6.2)          | 4.1 (1.8 to 6.8)          | -71.2 (-83.4 to -58.2)  | -73.7 (-84.9 to -60.2)    | -70 (-83.4 to -53.6)    |
|                      | Diet high in ..                          | DALYs                | 358.3 (217.6 to 526.5)    | 393.9 (243.5 to 574.5)    | 345.9 (200.7 to 515.6)   | 112 (49.7 to 173.2)       | 117.2 (51.8 to 182)       | 110.8 (48.9 to 177.1)     | -68.7 (-82.3 to -54)    | -70.3 (-83.1 to -56.1)    | -68 (-82.1 to -51.2)    |
|                      |                                          | YLLs                 | 316.3 (188.5 to 472.4)    | 341.1 (204.7 to 508.9)    | 308.8 (176.2 to 469.9)   | 91.3 (41.2 to 146.6)      | 90 (40.7 to 142.6)        | 92.2 (41.8 to 154.8)      | -71.1 (-84 to -55.8)    | -73.6 (-84.9 to -59.2)    | -70.1 (-84.2 to -51.9)  |
|                      |                                          | YLDs                 | 42 (24.2 to 59.9)         | 52.8 (30.4 to 75.8)       | 37 (21.3 to 52.9)        | 20.7 (7.8 to 32.8)        | 27.2 (10 to 43.1)         | 18.6 (6.8 to 29.2)        | -50.6 (-72.3 to -37.8)  | -48.6 (-71.6 to -35.4)    | -49.7 (-72 to -35.4)    |
|                      | Diet high in ..                          | Deaths               | 3.3 (0.4 to 14)           | 2.2 (0.5 to 9.3)          | 4 (0.3 to 17.1)          | 1.7 (0.2 to 6.6)          | 0.9 (0.2 to 3.8)          | 2 (0.2 to 8)              | -48.6 (-72.3 to -5.5)   | -57.4 (-80.2 to -12.9)    | -50.3 (-72.4 to 13.7)   |

| Location                                 | Risk factor | Measure | 1990                      |                           |                           | 2019                     |                          |                          | % Change (1990 to 2019) |                        |                        |
|------------------------------------------|-------------|---------|---------------------------|---------------------------|---------------------------|--------------------------|--------------------------|--------------------------|-------------------------|------------------------|------------------------|
|                                          |             |         | Both                      | Female                    | Male                      | Both                     | Female                   | Male                     | Both                    | Female                 | Male                   |
| Sodium                                   |             | DALYs   | 76.2 (8.2 to 313.8)       | 51.2 (9.3 to 221.5)       | 91.6 (6.2 to 384.2)       | 42.7 (4.5 to 164.6)      | 24.9 (5 to 100.9)        | 49.4 (3.9 to 194)        | -44 (-68.5 to 0)        | -51.4 (-79.1 to 6)     | -46 (-67.1 to 17.8)    |
|                                          |             | YLLs    | 68.2 (7.4 to 285.6)       | 44.9 (8.3 to 195.5)       | 82.7 (5.5 to 345.9)       | 35.4 (3.7 to 138.7)      | 19.3 (3.8 to 78.8)       | 41.5 (3.2 to 165)        | -48.2 (-71.8 to -5.2)   | -57 (-81.5 to -5)      | -49.8 (-70.5 to 11.7)  |
|                                          |             | YLDs    | 8 (0.8 to 31.6)           | 6.4 (1.1 to 26.2)         | 8.9 (0.6 to 36.1)         | 7.3 (0.7 to 28.1)        | 5.6 (1 to 22.8)          | 7.9 (0.6 to 31)          | -8.8 (-46.5 to 48.8)    | -12 (-63.8 to 99.4)    | -11.3 (-42.7 to 76.4)  |
| Diet low in fiber                        |             | Deaths  | 2.1 (0.5 to 4.8)          | 2.2 (0.6 to 5.3)          | 2 (0.5 to 4.7)            | 1.3 (0.3 to 3.1)         | 1.3 (0.3 to 3)           | 1.4 (0.3 to 3.1)         | -35.5 (-55.4 to -4.8)   | -41.4 (-62.2 to -6.6)  | -32 (-56.4 to 7.3)     |
|                                          |             | DALYs   | 43.2 (10.7 to 104.6)      | 47.2 (10.8 to 112.9)      | 41.8 (10.2 to 99.5)       | 31.7 (7 to 75.3)         | 32.8 (7.1 to 77.5)       | 31.5 (7 to 74.8)         | -26.6 (-48.2 to 6.6)    | -30.5 (-53.1 to 8.3)   | -24.6 (-50 to 11.9)    |
|                                          |             | YLLs    | 38.3 (9.3 to 93.9)        | 41.1 (9.2 to 99)          | 37.3 (9 to 90.7)          | 26 (5.7 to 62.6)         | 25.5 (5.4 to 61.8)       | 26.3 (5.8 to 64.5)       | -32.1 (-54.8 to 2.2)    | -37.9 (-60 to 0.6)     | -29.5 (-54.8 to 9.8)   |
| Diet low in fruits                       |             | YLDs    | 5 (1.1 to 11.1)           | 6.1 (1.4 to 14.3)         | 4.5 (1 to 10.1)           | 5.7 (1.2 to 12.5)        | 7.3 (1.5 to 16.8)        | 5.2 (1.1 to 11.4)        | 15.2 (-5.3 to 42.7)     | 19.9 (-6.3 to 59.2)    | 15.9 (-8.5 to 51.2)    |
|                                          |             | Deaths  | 1.8 (0.9 to 3.2)          | 2.4 (1.2 to 4.3)          | 1.5 (0.7 to 2.8)          | 2.4 (1 to 4.4)           | 2.5 (1 to 4.8)           | 2.4 (1 to 4.4)           | 33.1 (-22 to 127.9)     | 6.6 (-41.6 to 95.4)    | 59.7 (-16.2 to 215.4)  |
|                                          |             | DALYs   | 42.9 (22.6 to 74.2)       | 60.2 (31.7 to 99.9)       | 35.1 (17.7 to 62.4)       | 66.8 (27 to 118.5)       | 75.1 (30.7 to 135.8)     | 64.2 (26.2 to 117.2)     | 55.7 (-13.8 to 151.5)   | 24.8 (-32.9 to 116)    | 82.8 (-3.5 to 228.4)   |
| Diet low in vegetables                   |             | YLLs    | 38 (20.1 to 66.2)         | 52.7 (27.3 to 87.3)       | 31.3 (15.4 to 57.3)       | 55 (23 to 100.4)         | 58.7 (24.1 to 108.3)     | 53.9 (22.1 to 99.5)      | 44.7 (-21.7 to 144.8)   | 11.4 (-40.5 to 103.1)  | 72.3 (-11.3 to 223.8)  |
|                                          |             | YLDs    | 4.9 (2.1 to 8.7)          | 7.5 (3.1 to 13.2)         | 3.8 (1.7 to 6.7)          | 11.8 (3.9 to 21.9)       | 16.4 (5.2 to 30.8)       | 10.3 (3.3 to 19.2)       | 140.5 (56.7 to 236.2)   | 120 (42.6 to 215)      | 169.7 (70.2 to 303.5)  |
|                                          |             | Deaths  | 0.6 (0.3 to 1)            | 0.6 (0.4 to 1.2)          | 0.6 (0.3 to 1)            | 1.5 (0.4 to 2.9)         | 1.4 (0.4 to 2.7)         | 1.6 (0.4 to 3.1)         | 165.3 (-3.6 to 356.5)   | 134 (-17.9 to 361.5)   | 182.2 (-0.8 to 439.8)  |
| Diet low in whole grains                 |             | DALYs   | 8.9 (6.3 to 13.4)         | 9.4 (6.6 to 15.4)         | 8.6 (5.6 to 13.4)         | 38.3 (9.4 to 72.7)       | 37.4 (8.9 to 73.2)       | 38.8 (9.3 to 75.7)       | 330.3 (24.2 to 650.5)   | 297 (8.6 to 652.2)     | 348.7 (29.5 to 725.8)  |
|                                          |             | YLLs    | 8 (5.5 to 12.4)           | 8.4 (5.6 to 14)           | 7.9 (4.9 to 12.6)         | 31.5 (7.8 to 62.5)       | 29 (7.1 to 58.5)         | 32.5 (8 to 65.3)         | 290.9 (11.3 to 595.5)   | 245.2 (-5.8 to 568.4)  | 311.9 (17.3 to 684.6)  |
|                                          |             | YLDs    | 0.8 (0.6 to 1.2)          | 1 (0.7 to 1.4)            | 0.8 (0.5 to 1.1)          | 6.8 (1.4 to 13.2)        | 8.4 (1.6 to 16.9)        | 6.3 (1.3 to 11.9)        | 704.7 (88.2 to 1259.9)  | 727.3 (79.6 to 1365.7) | 735.9 (98.2 to 1319.8) |
| High body-mass index                     |             | Deaths  | 5.9 (1.6 to 9.6)          | 6.3 (1.8 to 10.3)         | 5.7 (1.6 to 9.8)          | 3.6 (1 to 5.6)           | 3.5 (1 to 5.6)           | 3.6 (1.1 to 5.8)         | -39.8 (-55.2 to -20.9)  | -44.5 (-59.1 to -23.5) | -36.5 (-54.9 to -10)   |
|                                          |             | DALYs   | 122.8 (31.9 to 198)       | 129.8 (35.5 to 211.3)     | 119.1 (31.9 to 200.6)     | 85.7 (23.2 to 133)       | 89.9 (24 to 139.5)       | 84.6 (24.1 to 133)       | -30.2 (-47.4 to -9.1)   | -30.7 (-47.6 to -9)    | -29 (-49.8 to -0.5)    |
|                                          |             | YLLs    | 102.7 (26.8 to 168.7)     | 105.1 (28.2 to 176.2)     | 101.3 (26.6 to 175.5)     | 66.7 (18.5 to 106.5)     | 65.4 (16.9 to 105)       | 67.5 (19.2 to 109.9)     | -35 (-53.9 to -9.8)     | -37.8 (-55.9 to -11.4) | -33.3 (-55.7 to -0.2)  |
| High fasting plasma glucose              |             | YLDs    | 20.1 (5.8 to 32.6)        | 24.7 (6.9 to 39.6)        | 17.8 (5.1 to 28.9)        | 19 (5 to 30.4)           | 24.5 (6.5 to 39.7)       | 17.1 (4.4 to 27.3)       | -5.7 (-14.3 to 0.7)     | -0.7 (-11.1 to 8.4)    | -4.2 (-14.4 to 3.9)    |
|                                          |             | Deaths  | 40.1 (24.6 to 62.4)       | 46 (29 to 69.4)           | 36.8 (20.5 to 60.7)       | 26.7 (16.8 to 39)        | 26.1 (16.9 to 37.3)      | 27 (16.5 to 40.6)        | -33.4 (-52.5 to -5.3)   | -43.4 (-59.9 to -15.4) | -26.5 (-51.2 to 13.7)  |
|                                          |             | DALYs   | 1163.3 (751.2 to 1722.1)  | 1393.7 (934.7 to 1979.9)  | 1058.1 (617.8 to 1677.7)  | 828.5 (569.3 to 1144.4)  | 874.6 (633.4 to 1167.2)  | 815.1 (546.8 to 1146.9)  | -28.8 (-48.8 to -0.7)   | -37.2 (-54.2 to -11.5) | -23 (-47.9 to 14.5)    |
| High LDL cholesterol                     |             | YLLs    | 1030.8 (651.1 to 1546.2)  | 1213.1 (799.4 to 1778.9)  | 949.5 (530.7 to 1543.3)   | 673.9 (446 to 966.8)     | 668.6 (452.6 to 917.8)   | 678.9 (432.2 to 1008.9)  | -34.6 (-55 to -4.2)     | -44.9 (-61.8 to -17.1) | -28.5 (-53.9 to 11.2)  |
|                                          |             | YLDs    | 132.5 (83.8 to 190.8)     | 180.6 (118 to 250.9)      | 108.6 (66.3 to 160.3)     | 154.6 (102.2 to 208.8)   | 206 (139.6 to 275.8)     | 136.2 (89.2 to 186.9)    | 16.7 (4.8 to 34.2)      | 14.1 (3.4 to 29.5)     | 25.4 (8.6 to 49.8)     |
|                                          |             | Deaths  | 56.2 (30.9 to 99)         | 60 (32.2 to 115.8)        | 53.6 (28.6 to 90.2)       | 27.3 (14.6 to 46.7)      | 24.8 (13.7 to 45.2)      | 28.4 (14.9 to 49.2)      | -51.4 (-65.1 to -33.6)  | -58.7 (-71.6 to -37.2) | -47 (-64.3 to -20.6)   |
| High systolic blood pressure             |             | DALYs   | 1073.4 (641.3 to 1704.4)  | 1139 (679.9 to 1924.4)    | 1036.6 (597.3 to 1626.8)  | 588.3 (353.8 to 922.6)   | 551.6 (336.7 to 878.1)   | 604.8 (350.8 to 968.7)   | -45.2 (-60.5 to -26)    | -51.6 (-66.7 to -27.4) | -41.7 (-60.8 to -12.6) |
|                                          |             | YLLs    | 960.5 (567.7 to 1543.6)   | 1002.9 (585.1 to 1754.6)  | 938.7 (532 to 1500.3)     | 486.4 (287.4 to 776.2)   | 430.3 (259 to 705.5)     | 510.3 (287.7 to 834)     | -49.4 (-64.8 to -29.4)  | -57.1 (-71.4 to -33.3) | -45.6 (-64.2 to -15.7) |
|                                          |             | YLDs    | 112.8 (62 to 183)         | 136 (74.8 to 221.4)       | 97.9 (52.6 to 165.4)      | 101.9 (58.4 to 161.2)    | 121.3 (69.8 to 192.3)    | 94.5 (53.1 to 150.3)     | -9.7 (-26.2 to 10.3)    | -10.8 (-31.9 to 18.9)  | -3.5 (-26.4 to 24)     |
| High temperature                         |             | Deaths  | 24.9 (8.8 to 51)          | 27.9 (9.3 to 62.6)        | 22.6 (8.4 to 46.9)        | 17.1 (6.6 to 34.1)       | 17.7 (6.6 to 36.1)       | 16.8 (6.6 to 33.9)       | -31.5 (-48.3 to -4.4)   | -36.6 (-53.1 to -7.2)  | -25.8 (-48 to 8.5)     |
|                                          |             | DALYs   | 502.6 (266.5 to 875.2)    | 559.5 (294 to 1008)       | 468.5 (241 to 846.4)      | 403.7 (232.6 to 670.1)   | 442 (250.9 to 715.8)     | 390.9 (222.7 to 649.3)   | -19.7 (-39.3 to 9.6)    | -21 (-40.4 to 9.4)     | -16.6 (-41.3 to 21.1)  |
|                                          |             | YLLs    | 419.8 (212.9 to 765.2)    | 453.7 (217.1 to 866.5)    | 397.1 (191.9 to 730.1)    | 314.5 (171.8 to 542.2)   | 322.5 (169.4 to 549.1)   | 312.1 (164.5 to 541)     | -25.1 (-46.7 to 10.3)   | -28.9 (-49.6 to 7.8)   | -21.4 (-47.7 to 24.5)  |
| Household air pollution from solid fuels |             | YLDs    | 82.8 (46.9 to 137.3)      | 105.8 (61.6 to 174.8)     | 71.4 (40.5 to 117.5)      | 89.2 (53 to 142.8)       | 119.5 (73 to 190.2)      | 78.8 (46.1 to 127.4)     | 7.8 (-0.4 to 17.2)      | 13 (3 to 25.6)         | 10.5 (0.6 to 22.4)     |
|                                          |             | Deaths  | 103.2 (77.9 to 150.6)     | 110.2 (80.1 to 158.9)     | 98.9 (69.1 to 147.2)      | 44.1 (30.5 to 61.3)      | 44.1 (30.4 to 62.9)      | 44.2 (29.7 to 62.6)      | -57.2 (-68.2 to -43.2)  | -60 (-71.6 to -42.6)   | -55.3 (-68.5 to -36.7) |
|                                          |             | DALYs   | 2147 (1655.1 to 3002.8)   | 2294.2 (1756.4 to 3194.9) | 2079 (1480.7 to 2989.1)   | 1008.2 (732.4 to 1350.4) | 1026.8 (755.5 to 1330.9) | 1001.2 (719.5 to 1374.9) | -53 (-65 to -38.2)      | -55.2 (-67 to -38.2)   | -51.8 (-66.2 to -32.2) |
| Kidney dysfunction                       |             | YLLs    | 1920.9 (1446.6 to 2793.5) | 2021.1 (1494.8 to 2849.9) | 1879.7 (1309.9 to 2786.9) | 833.3 (581 to 1175.1)    | 804.5 (570.6 to 1092.9)  | 844.9 (579.2 to 1214)    | -56.6 (-69.2 to -41.2)  | -60.2 (-71.9 to -41.7) | -55.1 (-69.2 to -33.9) |
|                                          |             | YLDs    | 226.1 (162.2 to 296)      | 273.1 (192.2 to 356.9)    | 199.3 (142.3 to 260.9)    | 174.9 (123.8 to 233.1)   | 222.3 (152 to 301.9)     | 156.3 (109 to 209.7)     | -22.7 (-29.8 to -15)    | -18.6 (-29.6 to -6.7)  | -21.6 (-30.5 to -12.1) |
|                                          |             | Deaths  | 11 (-4.7 to 28.5)         | 11.8 (-5.3 to 31.4)       | 10.5 (-4.3 to 28.1)       | 6.5 (1.9 to 13.9)        | 6.3 (1.8 to 13.1)        | 6.5 (1.9 to 13.9)        | -41.1 (-82.8 to -19.5)  | -46.5 (-82.7 to -20.6) | -37.4 (-83.5 to -10.9) |
| Lead exposure                            |             | YLLs    | 191.6 (-80.2 to 497.7)    | 202.4 (-91.8 to 536.7)    | 187.1 (-76.4 to 510.8)    | 112.3 (33 to 237.2)      | 108.1 (30.8 to 223.4)    | 114.5 (32.1 to 239.6)    | -41.4 (-82.9 to -15.8)  | -46.6 (-83.7 to -19)   | -38.8 (-83.8 to -6.8)  |
|                                          |             | Deaths  | 0.3 (0.1 to 0.7)          | 0.4 (0.1 to 0.9)          | 0.2 (0.1 to 0.5)          | 0 (0 to 0)               | 0 (0 to 0)               | 0 (0 to 0)               | -99.6 (-99.9 to -99)    | -99.6 (-99.9 to -99.1) | -99.6 (-99.9 to -98.9) |
|                                          |             | DALYs   | 6.3 (2.3 to 14.5)         | 8.7 (3.1 to 20.5)         | 5.1 (1.7 to 11.9)         | 0 (0 to 0.1)             | 0 (0 to 0.1)             | 0 (0 to 0.1)             | -99.6 (-99.9 to -98.9)  | -99.6 (-99.9 to -98.9) | -99.6 (-99.9 to -98.8) |
| Lead exposure                            |             | YLLs    | 5.6 (2 to 13)             | 7.6 (2.7 to 18)           | 4.6 (1.5 to 11)           | 0 (0 to 0.1)             | 0 (0 to 0.1)             | 0 (0 to 0.1)             | -99.6 (-99.9 to -99)    | -99.6 (-99.9 to -99)   | -99.6 (-99.9 to -98.9) |
|                                          |             | YLDs    | 0.7 (0.3 to 1.5)          | 1.1 (0.4 to 2.4)          | 0.5 (0.2 to 1.2)          | 0 (0 to 0)               | 0 (0 to 0)               | 0 (0 to 0)               | -99.3 (-99.8 to -98.3)  | -99.3 (-99.8 to -98.1) | -99.3 (-99.8 to -98.2) |
|                                          |             | Deaths  | 16.9 (11.1 to 25.6)       | 19.4 (12.4 to 30.1)       | 15.2 (9.6 to 22.9)        | 11 (6.6 to 16.3)         | 11.1 (6.3 to 16.7)       | 11 (6.7 to 16.3)         | -34.7 (-52.5 to -12.2)  | -42.9 (-59.7 to -19.2) | -27.3 (-50.4 to 2.7)   |
| Lead exposure                            |             | DALYs   | 349.6 (256.9 to 498.1)    | 409.6 (289.1 to 589.7)    | 314 (215.1 to 448.3)      | 251.4 (174.6 to 342.6)   | 270.5 (190.7 to 372)     | 245.2 (166 to 335.5)     | -28.1 (-45.5 to -6.6)   | -33.9 (-50.5 to -11.1) | -21.9 (-43.9 to 7.6)   |
|                                          |             | YLLs    | 309 (222.4 to 451.6)      | 355.2 (241.8 to 525.2)    | 281.9 (186.8 to 412.3)    | 204.4 (137.1 to 290)     | 206.9 (139 to 292.5)     | 204.8 (133 to 289.5)     | -33.8 (-52.7 to -10)    | -41.8 (-58.7 to -16.5) | -27.3 (-50 to 5.4)     |
|                                          |             | YLDs    | 40.6 (27.6 to 55.3)       | 54.4 (37.3 to 74.1)       | 32.1 (21.8 to 43.9)       | 47 (31.9 to 63.4)        | 63.7 (43.5 to 86.6)      | 40.4 (27.4 to 55.3)      | 15.7 (8 to 23.8)        | 17.1 (7.9 to 26.9)     | 25.9 (13.8 to 38.5)    |
| Lead exposure                            |             | Deaths  | 4.8 (1.7 to 8.9)          | 4.6 (1.3 to 8.9)          | 5 (1.9 to 9.3)            | 1.8 (0.5 to 3.6)         | 1.5 (0.3 to 3.1)         | 1.9 (0.5 to 3.8)         | -63.6 (-77.8 to -50.3)  | -68 (-82.6 to -54.9)   | -62.3 (-78.3 to -45.6) |
|                                          |             | DALYs   | 100.8 (34 to 185.1)       | 94.5 (23.2 to 180.4)      | 105.1 (38.4 to 197.4)     | 32.4 (5.9 to 69.5)       | 27.4 (3.4 to 62.7)       | 34.5 (6.7 to 73.6)       | -67.9 (-84.3 to -54.1)  | -71 (-87.8 to -58.4)   | -67.1 (-84.8 to -51.2) |
|                                          |             | YLLs    | 90.5 (30.8 to 170.8)      | 83.4 (20.8 to 161.5)      | 95.3 (34.4 to 182.8)      | 27.2 (5.2 to 58.7)       | 21.9 (2.8 to 49.8)       | 29.5 (5.8 to 64.2)       | -69.9 (-85.2 to -56)    | -73.8 (-88.6 to -61.5) | -69 (-85.6 to -52.5)   |
| Lead exposure                            |             | YLDs    | 10.3 (3.2 to 19)          | 11.1 (2.6 to 21.9)        | 9.8 (3.4 to 17.8)         | 5.2 (0.8 to 11.5)        | 5.5 (0.5 to 13.1)        | 5 (0.9 to 10.8)          | -50 (-77.9 to -36.4)    | -50.1 (-83.1 to -35.1) | -49.1 (-77.1 to -34.3) |

| Location | Risk factor                          | Measure             | 1990                      |                           |                           | 2019                      |                           |                           | % Change (1990 to 2019) |                         |                        |
|----------|--------------------------------------|---------------------|---------------------------|---------------------------|---------------------------|---------------------------|---------------------------|---------------------------|-------------------------|-------------------------|------------------------|
|          |                                      |                     | Both                      | Female                    | Male                      | Both                      | Female                    | Male                      | Both                    | Female                  | Male                   |
|          | Low physical activity                | Deaths              | 13.6 (3.5 to 26.5)        | 13.8 (3.4 to 27.4)        | 13.4 (3.3 to 26.2)        | 8.5 (2.1 to 16.1)         | 7.8 (2 to 15.5)           | 8.7 (2.2 to 16.9)         | -37.7 (-52.6 to -18.9)  | -43.3 (-57.9 to -19.3)  | -35.2 (-53 to -9.4)    |
|          |                                      | DALYs               | 218.6 (49.6 to 443.7)     | 213.7 (47.5 to 441.8)     | 220.9 (48.4 to 443.7)     | 153.3 (34.2 to 310.3)     | 144.1 (32.2 to 299.1)     | 156.8 (33.7 to 316.1)     | -29.9 (-46.5 to -9.7)   | -32.6 (-49.3 to -9.7)   | -29 (-47.7 to -3.4)    |
|          |                                      | YLLs                | 189 (44 to 385.2)         | 182.1 (42 to 382.4)       | 192.7 (41.2 to 396.7)     | 123.8 (29.4 to 253)       | 110.7 (24.9 to 234.2)     | 128.9 (27.9 to 264.5)     | -34.5 (-51.9 to -11.6)  | -39.2 (-55.8 to -13.9)  | -33.1 (-53 to -3.9)    |
|          |                                      | YLDs                | 29.6 (5.6 to 64.9)        | 31.6 (6.3 to 73.3)        | 28.2 (5.1 to 60.4)        | 29.5 (5.6 to 64)          | 33.4 (6.5 to 75)          | 27.9 (5 to 59.8)          | -0.5 (-8.4 to 9.3)      | 5.7 (-6 to 22.2)        | -1.1 (-10.8 to 8.9)    |
|          | Low temperature                      | Deaths              | 8 (-13.2 to 28.1)         | 8.6 (-13.6 to 30.2)       | 7.6 (-12.9 to 27.7)       | 3.7 (-6.3 to 12.7)        | 3.7 (-6.2 to 12.3)        | 3.8 (-6.3 to 13.3)        | -                       | -                       | -                      |
|          |                                      | YLLs                | 140.2 (-227.3 to 488.8)   | 147.9 (-236.3 to 525.7)   | 137 (-236 to 484.1)       | 65.2 (-109.2 to 220.9)    | 63 (-100.5 to 210.5)      | 66.3 (-110.7 to 229.1)    | -                       | -                       | -                      |
|          | Secondhand smoke                     | Deaths              | 6.7 (4.5 to 9.8)          | 7.7 (5.1 to 11.4)         | 6.3 (3.8 to 9.5)          | 3.6 (2.4 to 5)            | 3.8 (2.6 to 5.3)          | 3.5 (2.3 to 5.1)          | -47.1 (-61.5 to -28.2)  | -51 (-65.3 to -28.9)    | -43.9 (-61 to -17.1)   |
|          |                                      | DALYs               | 148.4 (99 to 216.3)       | 185.8 (124.7 to 267.9)    | 134.3 (84.3 to 201.1)     | 84.4 (57.1 to 118.7)      | 101.7 (70.6 to 140.9)     | 79.8 (52.2 to 115.1)      | -43.1 (-58.5 to -22.5)  | -45.3 (-61.1 to -22.4)  | -40.6 (-58.9 to -12.4) |
|          |                                      | YLLs                | 138.3 (91.4 to 203.9)     | 171 (113.8 to 250.9)      | 126.3 (77.2 to 193.4)     | 74.6 (49.6 to 106.7)      | 86.6 (58.3 to 122.8)      | 71.8 (45.6 to 104.6)      | -46 (-62 to -24.4)      | -49.4 (-64.7 to -25.5)  | -43.1 (-62 to -13.3)   |
|          | Smoking                              | YLDs                | 10.1 (6.5 to 14.2)        | 14.7 (9.4 to 20.4)        | 8 (5.2 to 11.5)           | 9.7 (6.5 to 13.8)         | 15.1 (9.9 to 21.3)        | 8 (5.3 to 11.4)           | -3.7 (-12.9 to 7)       | 2.6 (-8.1 to 14.6)      | -0.6 (-14.7 to 16.3)   |
|          |                                      | Deaths              | 15.7 (11.2 to 22.3)       | 7.2 (4.7 to 11.4)         | 21.1 (14.5 to 30.5)       | 8.7 (6.2 to 11.8)         | 3.4 (2.3 to 5)            | 10.9 (7.6 to 15)          | -44.4 (-61.5 to -20.7)  | -53 (-71.7 to -20.8)    | -48.4 (-65.4 to -23.9) |
|          |                                      | DALYs               | 421.5 (305.5 to 587.3)    | 201.3 (134.3 to 300.7)    | 543.7 (382.1 to 771.3)    | 255.1 (187 to 339.5)      | 114 (78.3 to 159)         | 307 (220.7 to 415.9)      | -39.5 (-57.9 to -14.7)  | -43.4 (-64.9 to -7.1)   | -43.5 (-61.4 to -18.3) |
|          |                                      | YLLs                | 375.3 (261.8 to 540.9)    | 174.9 (113.2 to 273.3)    | 487.3 (326.6 to 713.7)    | 210.3 (144.5 to 290)      | 86.9 (57.7 to 126.3)      | 255.8 (174.3 to 358.3)    | -44 (-63.2 to -17.2)    | -50.3 (-70.8 to -15.2)  | -47.5 (-66.3 to -19.8) |
|          |                                      |                     | YLDs                      | 46.2 (32.8 to 60.7)       | 26.4 (16.6 to 37.4)       | 56.4 (39.5 to 74.8)       | 44.8 (31.4 to 57.7)       | 27.1 (17.4 to 38.9)       | 51.2 (35.2 to 66.4)     | -3 (-17.2 to 13.4)      | 2.6 (-29.5 to 50.5)    |
| Yemen    | All risk factors                     | Deaths              | 146.5 (99.2 to 191.4)     | 145.3 (94.9 to 195)       | 148 (102.3 to 195.4)      | 114.7 (86.2 to 148.7)     | 117.6 (84.3 to 153.5)     | 111.4 (82.3 to 150.1)     | -21.7 (-38.7 to 2.7)    | -19.1 (-37.1 to 10.1)   | -24.7 (-42 to 0.2)     |
|          |                                      | DALYs               | 3108.9 (2192.1 to 4101.1) | 3127.3 (2150.8 to 4168)   | 3093.4 (2195.4 to 4125.7) | 2391.7 (1853.8 to 3075.2) | 2479.3 (1884.5 to 3225.3) | 2300.6 (1725.6 to 3107.5) | -23.1 (-40.5 to 1.9)    | -20.7 (-39 to 8.5)      | -25.6 (-43.8 to 0.5)   |
|          |                                      | YLLs                | 2898.7 (1992 to 3877.6)   | 2888.1 (1916.9 to 3958.9) | 2916.9 (2039.1 to 3958.7) | 2176.4 (1644 to 2871.7)   | 2225.7 (1628.5 to 2951.8) | 2124.8 (1549.9 to 2919.7) | -24.9 (-42.8 to 1.5)    | -22.9 (-41.9 to 8.3)    | -27.2 (-45.9 to 0.6)   |
|          |                                      | YLDs                | 210.2 (152.8 to 266)      | 239.1 (173.3 to 302.9)    | 176.5 (126.5 to 225.5)    | 215.2 (157.4 to 272.4)    | 253.6 (185.6 to 323.8)    | 175.7 (128.2 to 221.8)    | 2.4 (-3.7 to 9.1)       | 6.1 (-1.6 to 14.9)      | -0.4 (-8 to 7.8)       |
|          | Alcohol use                          | Deaths              | 2.1 (1.2 to 3.2)          | 0.8 (0.3 to 1.4)          | 3.6 (2 to 5.5)            | 0.4 (0.1 to 0.7)          | 0 (-0.1 to 0.2)           | 0.8 (0.3 to 1.4)          | -80.9 (-92.9 to -65.1)  | -94.2 (-117.6 to -73.9) | -78.8 (-90.7 to -63.2) |
|          |                                      | DALYs               | 58.8 (34.9 to 88.8)       | 20 (8.5 to 36.4)          | 98.6 (57.2 to 151.9)      | 12.6 (4.8 to 22.4)        | 1.9 (-1.1 to 5.8)         | 23.4 (9.8 to 41.5)        | -78.6 (-90.1 to -62.2)  | -90.3 (-109.8 to -72)   | -76.3 (-88.1 to -59.7) |
|          |                                      | YLLs                | 56 (32.4 to 85.3)         | 19.1 (7.9 to 35.1)        | 94.1 (53.6 to 146.1)      | 11.8 (4.6 to 21.3)        | 1.9 (-0.9 to 5.6)         | 21.9 (9.3 to 39.4)        | -78.9 (-90 to -62.4)    | -90 (-108.1 to -72)     | -76.7 (-88.4 to -60.1) |
|          |                                      | YLDs                | 2.7 (1.7 to 3.9)          | 0.9 (0.4 to 1.7)          | 4.5 (2.7 to 6.7)          | 0.8 (0.2 to 1.4)          | 0 (-0.3 to 0.4)           | 1.5 (0.6 to 2.5)          | -72.5 (-90 to -55.3)    | -96.8 (-151.7 to -67.3) | -67.3 (-84.2 to -50.6) |
|          | Ambient particulate matter pollution | Deaths              | 7.2 (1.9 to 18.4)         | 6.1 (1.6 to 16.3)         | 8.7 (2.2 to 22.2)         | 21.7 (10.5 to 35.1)       | 20.2 (9.5 to 33.7)        | 23.3 (11 to 37.8)         | 201.5 (63.6 to 602.8)   | 232.3 (75 to 696.8)     | 166.3 (42.9 to 537.5)  |
|          |                                      | DALYs               | 166 (43 to 428)           | 140.1 (37.1 to 370.8)     | 196.1 (49.2 to 503.9)     | 504.6 (240.8 to 806.7)    | 476.2 (224.7 to 790.5)    | 534.1 (256.8 to 849.3)    | 204.1 (60.2 to 642.4)   | 239.9 (76.1 to 719.5)   | 172.4 (40.3 to 580.2)  |
|          |                                      | YLLs                | 154.7 (40 to 404.7)       | 129.1 (32.9 to 344.7)     | 184.5 (46.1 to 475.2)     | 457.7 (216.2 to 737.5)    | 425.1 (198.4 to 706.2)    | 491.3 (229.9 to 797.2)    | 195.9 (55.1 to 637.1)   | 229.3 (70 to 709.3)     | 166.3 (37.5 to 572.7)  |
|          |                                      | YLDs                | 11.3 (2.9 to 30.2)        | 11 (2.7 to 29.7)          | 11.6 (2.8 to 30)          | 47 (23.4 to 76.8)         | 51 (24.1 to 86.1)         | 42.9 (20.7 to 69.2)       | 316.3 (120.5 to 900.8)  | 364.3 (151.8 to 983.2)  | 270.9 (96.2 to 816.6)  |
|          | Diet high in red meat                | Deaths              | 3.5 (1.1 to 6.3)          | 3.5 (1 to 6.3)            | 3.6 (1.1 to 6.4)          | 2.7 (0.9 to 4.8)          | 2.8 (0.9 to 4.9)          | 2.7 (0.9 to 4.7)          | -23.1 (-52 to 28)       | -21.1 (-52.5 to 34.5)   | -25.7 (-54.6 to 19.5)  |
|          |                                      | DALYs               | 92.4 (25 to 164.8)        | 93.8 (25.4 to 167.1)      | 91.3 (25.5 to 164.4)      | 72.2 (23.1 to 125.3)      | 75.1 (25 to 131.3)        | 69.3 (23 to 121.6)        | -21.9 (-52 to 34.6)     | -20 (-52.9 to 44.9)     | -24.1 (-54 to 29.5)    |
|          |                                      | YLLs                | 85.7 (22.7 to 155.3)      | 86.1 (22.1 to 156.2)      | 85.6 (23.6 to 157)        | 64.9 (20.9 to 114.6)      | 66.5 (21.1 to 118.6)      | 63.3 (20.4 to 113.4)      | -24.2 (-53.7 to 35.2)   | -22.7 (-55.3 to 47.6)   | -26 (-55.1 to 30.3)    |
|          |                                      | YLDs                | 6.7 (2.1 to 11.7)         | 7.7 (2.4 to 13.3)         | 5.7 (1.8 to 9.8)          | 7.3 (2 to 12.7)           | 8.5 (2.3 to 14.9)         | 6 (1.6 to 10.6)           | 7.9 (-22 to 30.6)       | 10.8 (-22.9 to 36.8)    | 4.6 (-22 to 28.5)      |
|          | Diet high in sodium                  | Deaths              | 2.8 (0.4 to 11.9)         | 2.1 (0.4 to 8.7)          | 3.8 (0.3 to 16.7)         | 2.2 (0.4 to 8.8)          | 1.6 (0.3 to 6.5)          | 2.8 (0.3 to 11.3)         | -24.1 (-55.1 to 35.7)   | -23.8 (-63 to 51.1)     | -27.9 (-59.4 to 56.8)  |
|          |                                      | DALYs               | 69.7 (8.2 to 284.5)       | 49.9 (8.9 to 210.2)       | 91.7 (6.5 to 391)         | 51.8 (6.9 to 205.3)       | 37.7 (6.9 to 157)         | 66.2 (5.1 to 260.9)       | -25.7 (-57.2 to 39.8)   | -24.4 (-65.5 to 70.8)   | -27.8 (-59.1 to 53.1)  |
|          |                                      | YLLs                | 65.1 (7.5 to 267.6)       | 46.1 (7.9 to 196.6)       | 86.3 (6.1 to 369.3)       | 47.2 (6.2 to 187.4)       | 33.8 (6.1 to 140.3)       | 61 (4.6 to 242.5)         | -27.5 (-58.3 to 37.9)   | -26.6 (-66.4 to 67.3)   | -29.4 (-60.4 to 49.9)  |
|          |                                      | YLDs                | 4.6 (0.6 to 18.2)         | 3.8 (0.7 to 15.4)         | 5.4 (0.4 to 22.2)         | 4.6 (0.6 to 18.1)         | 3.9 (0.7 to 16.3)         | 5.2 (0.4 to 20.5)         | 0.1 (-41.2 to 82.3)     | 3.2 (-50.5 to 121.4)    | -2.3 (-36.5 to 102.8)  |
|          | Diet low in fiber                    | Deaths              | 7.6 (1.6 to 14.6)         | 7.6 (1.5 to 14.7)         | 7.7 (1.6 to 14.4)         | 6.3 (1.5 to 11.9)         | 6.5 (1.5 to 12.2)         | 6.2 (1.4 to 11.5)         | -16.8 (-35.6 to 15.6)   | -14.5 (-35 to 21.9)     | -19.6 (-40.3 to 12.2)  |
|          |                                      | DALYs               | 180.4 (36.1 to 347.9)     | 183.2 (35.4 to 356.6)     | 178 (36.4 to 341.8)       | 152 (34.9 to 282.4)       | 158.1 (35.4 to 293.8)     | 145.8 (32.9 to 274.2)     | -15.7 (-36.3 to 18.7)   | -13.7 (-36.3 to 25.9)   | -18.1 (-40.1 to 15.9)  |
|          |                                      | YLLs                | 167 (33.3 to 325.8)       | 167.9 (32.3 to 330.8)     | 166.7 (33.4 to 322.6)     | 136.9 (31.1 to 257.2)     | 140.3 (31.4 to 265.4)     | 133.4 (29.9 to 253.7)     | -18 (-39.5 to 18.7)     | -16.4 (-39.6 to 26.3)   | -20 (-42.9 to 15.6)    |
|          |                                      | YLDs                | 13.4 (2.8 to 24.9)        | 15.4 (3.1 to 28.5)        | 11.3 (2.4 to 20.7)        | 15.1 (3.5 to 27.3)        | 17.8 (4 to 32.4)          | 12.4 (2.9 to 22.2)        | 12.7 (2.8 to 32.4)      | 15.8 (2.9 to 40.5)      | 9.8 (-2.8 to 30.1)     |
|          | Diet low in fruits                   | Deaths              | 13 (6.8 to 21.8)          | 13 (6.6 to 22)            | 13 (6.7 to 22)            | 8.8 (4.2 to 14.5)         | 9 (4.2 to 15)             | 8.5 (4 to 14.2)           | -32.5 (-53.6 to -2.3)   | -30.9 (-54 to 5.5)      | -34.5 (-55.5 to -5.4)  |
|          |                                      | DALYs               | 325.1 (175 to 544.1)      | 333.4 (169.4 to 562)      | 317.7 (165.9 to 533)      | 220.3 (112.5 to 360.6)    | 230.3 (115.1 to 378.9)    | 210.2 (103.7 to 347.6)    | -32.2 (-53.6 to -0.6)   | -30.9 (-53.7 to 6.8)    | -33.9 (-55 to -3)      |
|          |                                      | YLLs                | 304.3 (158.5 to 520.4)    | 309.4 (156.3 to 531.4)    | 300.3 (154 to 510.2)      | 200.4 (103.1 to 331.3)    | 206.8 (103.7 to 344.8)    | 193.9 (95.7 to 327)       | -34.2 (-55.5 to -0.5)   | -33.2 (-56.1 to 6.8)    | -35.4 (-56.7 to -2.8)  |
|          |                                      | YLDs                | 20.8 (9.8 to 34.7)        | 24 (11.3 to 40.2)         | 17.4 (8.1 to 29.3)        | 20 (8.5 to 34.9)          | 23.6 (10.1 to 41.2)       | 16.3 (7 to 28.2)          | -4.1 (-22.8 to 9)       | -1.8 (-22.8 to 13.5)    | -6.6 (-23.7 to 7.2)    |
|          | Diet low in vegetables               | Deaths              | 8.9 (3.3 to 15.4)         | 8.7 (3.1 to 15.3)         | 9.1 (3.4 to 15.7)         | 6.1 (2.6 to 10)           | 6.1 (2.6 to 10.1)         | 6 (2.6 to 9.9)            | -31.5 (-52.1 to 6.6)    | -29.9 (-52.8 to 11.6)   | -33.8 (-54.1 to 1.1)   |
|          |                                      | DALYs               | 217.9 (75 to 385.9)       | 219.3 (75.1 to 385.2)     | 217.5 (75.5 to 387.5)     | 150.9 (63.4 to 249.5)     | 155 (65.1 to 260.2)       | 146.8 (63.7 to 245.7)     | -30.7 (-52 to 8.6)      | -29.3 (-52.6 to 13.8)   | -32.5 (-53.2 to 6.5)   |
|          |                                      | YLLs                | 204.6 (68.2 to 365.5)     | 204.3 (66.8 to 363.4)     | 206.2 (69.6 to 371.8)     | 137.8 (58.9 to 229.2)     | 139.7 (58.9 to 237.5)     | 135.9 (58.2 to 230.2)     | -32.7 (-53.7 to 8.3)    | -31.6 (-54.6 to 14.4)   | -34.1 (-54.6 to 6.5)   |
|          |                                      | YLDs                | 13.3 (5.4 to 22)          | 15.1 (6.1 to 25)          | 11.3 (4.6 to 19.1)        | 13.1 (4.7 to 22.7)        | 15.3 (5.3 to 26.8)        | 11 (4 to 18.7)            | -0.9 (-23.3 to 16.7)    | 1.4 (-23.3 to 22.4)     | -3.3 (-23.7 to 14.1)   |
|          | Diet low in whole grains             | Deaths              | 6.7 (3.8 to 9.8)          | 6.5 (3.6 to 9.5)          | 6.9 (3.8 to 10.7)         | 8.2 (4.7 to 11.9)         | 8.4 (4.9 to 12.1)         | 7.9 (4.5 to 12)           | 22.3 (-3.5 to 57.2)     | 29.7 (2.3 to 73.3)      | 14.5 (-14.5 to 54)     |
|          |                                      | DALYs               | 131.9 (72.1 to 194.8)     | 128.9 (67.6 to 189.8)     | 134.8 (73.5 to 208)       | 168.1 (91.8 to 240.2)     | 175.7 (94 to 250.8)       | 160.3 (87 to 240.5)       | 27.5 (0.4 to 63.4)      | 36.3 (7.5 to 81)        | 18.9 (-11.8 to 58.1)   |
| YLLs     |                                      | 114.1 (62.7 to 173) | 108.7 (57 to 165.2)       | 119.7 (63.9 to 187.7)     | 146.7 (79.2 to 216.5)     | 150.3 (79.4 to 221.4)     | 142.9 (77 to 218.9)       | 28.6 (-2.4 to 72)         | 38.3 (5.5 to 92.4)      | 19.4 (-14.6 to 66)      |                        |

| Location                                 | Risk factor | Measure | 1990                      |                           |                           | 2019                   |                           |                          | % Change (1990 to 2019) |                        |                        |
|------------------------------------------|-------------|---------|---------------------------|---------------------------|---------------------------|------------------------|---------------------------|--------------------------|-------------------------|------------------------|------------------------|
|                                          |             |         | Both                      | Female                    | Male                      | Both                   | Female                    | Male                     | Both                    | Female                 | Male                   |
| High body-mass index                     | YLDs        | Deaths  | 17.8 (9 to 25.9)          | 20.1 (10.1 to 29.8)       | 15 (7.6 to 22.2)          | 21.4 (11.2 to 31.1)    | 25.3 (13.3 to 36.9)       | 17.4 (9.1 to 25.3)       | 20.3 (12.5 to 29.6)     | 25.9 (16.1 to 38.1)    | 15.3 (5 to 26.5)       |
|                                          |             | Deaths  | 15 (5.6 to 28)            | 18.8 (7.6 to 33.3)        | 11 (3 to 23)              | 17.8 (9.1 to 29.7)     | 21.2 (10.9 to 34.2)       | 14.4 (6.6 to 25)         | 18.6 (-19 to 105.8)     | 12.3 (-24.3 to 95.7)   | 31.2 (-14.7 to 183.2)  |
|                                          |             | DALYs   | 469.4 (178.8 to 859.5)    | 595.6 (250.1 to 1030.5)   | 343.8 (97.7 to 704.1)     | 564 (299.1 to 912.1)   | 677.3 (363.7 to 1058.7)   | 449.1 (215.8 to 764.7)   | 20.1 (-19.5 to 108.1)   | 13.7 (-23.5 to 99.9)   | 30.6 (-15.4 to 174.7)  |
| High fasting plasma glucose              | YLLs        | Deaths  | 436.7 (163.5 to 803.6)    | 550.6 (224.4 to 957.4)    | 323.2 (89 to 668.7)       | 508.8 (262.7 to 836.3) | 604.1 (316.7 to 962.7)    | 412.1 (192.7 to 710.2)   | 16.5 (-23.6 to 105.1)   | 9.7 (-27.9 to 98.2)    | 27.5 (-18.9 to 175.5)  |
|                                          |             | Deaths  | 32.7 (13.8 to 59.7)       | 45 (20.2 to 76.8)         | 20.5 (6.1 to 41.6)        | 55.2 (29.7 to 84.2)    | 73.2 (40.9 to 110.1)      | 36.9 (17.8 to 59.9)      | 68.5 (32.7 to 156.3)    | 62.5 (26.8 to 144.1)   | 79.8 (33.1 to 234.4)   |
|                                          |             | Deaths  | 20.7 (12.2 to 34.9)       | 20 (11.2 to 34.2)         | 22.2 (13.3 to 37.1)       | 32.6 (17.2 to 59.1)    | 34.4 (17.6 to 63.6)       | 30.7 (15.4 to 54.3)      | 57.4 (8 to 131.6)       | 71.9 (12.5 to 156.7)   | 38 (-13.5 to 106.1)    |
| High LDL cholesterol                     | DALYs       | Deaths  | 396.6 (247.3 to 610.7)    | 389.5 (231.4 to 604.4)    | 410.7 (251.6 to 631)      | 626.9 (351 to 1071.4)  | 659.4 (356.5 to 1142)     | 592.3 (307.2 to 1029.6)  | 58.1 (6.2 to 130.7)     | 69.3 (9.1 to 154.3)    | 44.2 (-11.6 to 120.4)  |
|                                          |             | Deaths  | 370.7 (228 to 573.9)      | 360.5 (207.4 to 568)      | 388.5 (236.5 to 606.4)    | 572.8 (314.3 to 978.1) | 594.9 (320.1 to 1039.9)   | 549 (279.8 to 953.8)     | 54.5 (2.6 to 128.7)     | 65 (5.1 to 151.8)      | 41.3 (-14.9 to 117.5)  |
|                                          |             | Deaths  | 25.9 (15 to 43.2)         | 29 (16.7 to 48.3)         | 22.3 (12.7 to 36.6)       | 54.1 (27.3 to 95.1)    | 64.5 (31.2 to 116.5)      | 43.3 (21.2 to 78)        | 108.8 (52.3 to 175.8)   | 122.6 (53.7 to 206.9)  | 94.5 (33.6 to 163.1)   |
| High systolic blood pressure             | DALYs       | Deaths  | 14.4 (4.7 to 32.9)        | 14.4 (4.5 to 34.5)        | 14 (4.9 to 29.2)          | 18.2 (7.1 to 40.1)     | 19.3 (7.7 to 42.1)        | 16.9 (6.5 to 35.7)       | 26.7 (-1.1 to 72.2)     | 34.1 (4.5 to 90.7)     | 21.1 (-10.4 to 68.8)   |
|                                          |             | Deaths  | 296.2 (149.5 to 530.2)    | 300.6 (150.8 to 568.4)    | 287.3 (141.1 to 510.6)    | 399.1 (221.3 to 709.5) | 431.6 (244.8 to 765.9)    | 365.2 (198.4 to 641.5)   | 34.7 (4.7 to 80.1)      | 43.6 (10.9 to 99.3)    | 27.1 (-7.4 to 78.2)    |
|                                          |             | Deaths  | 252.8 (119.7 to 462)      | 249.7 (113.6 to 490.7)    | 252.3 (116.3 to 457.8)    | 344.5 (185.6 to 630.6) | 365.3 (196.2 to 665)      | 322.7 (166.5 to 575.7)   | 36.3 (2.1 to 91.2)      | 46.3 (8.3 to 117.3)    | 27.9 (-10.7 to 88.1)   |
| High temperature                         | DALYs       | Deaths  | 43.4 (25.3 to 71.3)       | 50.9 (30.1 to 84.1)       | 35 (20.5 to 57.5)         | 54.6 (33.4 to 87.1)    | 66.3 (40.3 to 106.3)      | 42.5 (25.9 to 68.1)      | 25.7 (16.2 to 38.2)     | 30.2 (18.7 to 44.8)    | 21.5 (8.9 to 37.3)     |
|                                          |             | Deaths  | 78.3 (49.6 to 109.4)      | 83 (50.8 to 118.1)        | 71.5 (47.1 to 102.9)      | 61.6 (42.7 to 85.1)    | 67.1 (44.9 to 93)         | 55.6 (37.6 to 80.5)      | -21.4 (-41.3 to 8)      | -19.1 (-43.2 to 18.1)  | -22.3 (-44.7 to 8.7)   |
|                                          |             | Deaths  | 1711.7 (1138 to 2347)     | 1844.2 (1153 to 2602)     | 1558.1 (1037.8 to 2217.8) | 1344.8 (963 to 1816.7) | 1480.5 (1023.9 to 2029.1) | 1204.2 (833.8 to 1701.9) | -21.4 (-42 to 7.3)      | -19.7 (-43.5 to 16)    | -22.7 (-45.3 to 7.8)   |
| Household air pollution from solid fuels | YLLs        | Deaths  | 1598.4 (1035.7 to 2223.1) | 1707.6 (1042.6 to 2427.9) | 1471.3 (959.9 to 2137.4)  | 1223.5 (861 to 1702)   | 1330.3 (895.2 to 1847)    | 1112.6 (749.4 to 1598.3) | -23.5 (-44.3 to 6.6)    | -22.1 (-46.6 to 16.5)  | -24.4 (-47.6 to 7.6)   |
|                                          |             | Deaths  | 113.2 (76.2 to 152.7)     | 136.6 (90.2 to 186.5)     | 86.8 (58.4 to 118.6)      | 121.3 (84.6 to 162)    | 150.3 (102.8 to 202.7)    | 91.6 (63 to 122)         | 7.2 (-7.6 to 27.1)      | 10 (-11.1 to 38.6)     | 5.6 (-13.2 to 28.8)    |
|                                          |             | Deaths  | 5.9 (-2.3 to 14.5)        | 5.9 (-2.3 to 14)          | 6 (-2.4 to 15.6)          | 4.8 (1.6 to 10.4)      | 4.9 (1.6 to 10)           | 4.7 (1.6 to 10.1)        | -18.5 (-94.9 to 22.6)   | -16.1 (-95 to 27.6)    | -21.7 (-94.9 to 16.2)  |
| Kidney dysfunction                       | YLLs        | Deaths  | 115.9 (-41.9 to 287.8)    | 115.9 (-42.8 to 278.7)    | 116.5 (-41.6 to 297.8)    | 89.3 (29.1 to 188.2)   | 91.1 (30.2 to 181.1)      | 87.4 (29.3 to 181.1)     | -23 (-95.2 to 17)       | -21.4 (-95.4 to 22.4)  | -25 (-95.2 to 11.1)    |
|                                          |             | Deaths  | 62.8 (38.9 to 94)         | 64.5 (39.8 to 96.4)       | 60.1 (36.5 to 90.1)       | 18.5 (10.5 to 28.3)    | 20.9 (12.2 to 32.1)       | 15.8 (8.3 to 25.9)       | -70.6 (-80.4 to -57.2)  | -67.6 (-78.3 to -52.1) | -73.6 (-83.5 to -60.6) |
|                                          |             | Deaths  | 1407.3 (914 to 2022.7)    | 1470.2 (954.5 to 2112.5)  | 1334.8 (835.7 to 1956.8)  | 429.4 (244.7 to 650)   | 493.4 (287.7 to 747.3)    | 363.5 (194.5 to 598.1)   | -69.5 (-80 to -55.2)    | -66.4 (-77.8 to -50.1) | -72.8 (-83 to -59.3)   |
| Lead exposure                            | YLLs        | Deaths  | 1309.3 (826.6 to 1908.3)  | 1355.2 (842.5 to 1971.3)  | 1256.3 (764.8 to 1864.7)  | 388.1 (218.6 to 599.1) | 440.5 (254.3 to 675.5)    | 334.2 (176.7 to 551.6)   | -70.4 (-80.8 to -55.3)  | -67.5 (-78.6 to -50.5) | -73.4 (-83.7 to -59.5) |
|                                          |             | Deaths  | 97.9 (64.3 to 137.1)      | 115 (76.1 to 159.3)       | 78.6 (51.1 to 110.8)      | 41.2 (23 to 62.4)      | 52.9 (30.7 to 78.7)       | 29.3 (15.4 to 46.7)      | -57.9 (-69.9 to -45.3)  | -54 (-66.8 to -41.5)   | -62.7 (-75.4 to -49.3) |
|                                          |             | Deaths  | 11.5 (7.4 to 16.1)        | 12.1 (7.4 to 17.5)        | 10.6 (7.2 to 14.9)        | 12.4 (7.9 to 17.7)     | 13.1 (8.2 to 19)          | 11.5 (7.4 to 16.7)       | 7.6 (-17.8 to 43.9)     | 8.7 (-19.4 to 54.9)    | 8.4 (-20 to 44)        |
| Low physical activity                    | DALYs       | Deaths  | 245.6 (166.2 to 338.4)    | 264.8 (171.8 to 373.9)    | 224.2 (157 to 309.1)      | 260.8 (184.9 to 351.9) | 283.5 (201 to 388.5)      | 237.4 (166.8 to 327.7)   | 6.2 (-18.3 to 40.9)     | 7.1 (-18.7 to 48.5)    | 5.9 (-20.8 to 39.5)    |
|                                          |             | Deaths  | 227.2 (150.3 to 318.5)    | 242.4 (150.9 to 347.1)    | 210.2 (144.2 to 294.2)    | 235.6 (163.5 to 324.4) | 252.4 (173.9 to 352.6)    | 218.3 (149 to 306.3)     | 3.7 (-21.6 to 41.1)     | 4.1 (-22.7 to 50)      | 3.9 (-23.6 to 39.6)    |
|                                          |             | Deaths  | 18.4 (12.6 to 24.7)       | 22.4 (15.3 to 30.2)       | 14 (9.5 to 19)            | 25.2 (17.1 to 34.5)    | 31.1 (21.1 to 42.8)       | 19.1 (12.9 to 26)        | 36.7 (25.4 to 50.2)     | 39 (24.4 to 58.2)      | 36.4 (22.2 to 52.5)    |
| Low temperature                          | DALYs       | Deaths  | 17.7 (10.7 to 25.4)       | 14.6 (8.5 to 21.4)        | 21.8 (13.4 to 31.8)       | 14.5 (9.4 to 20.9)     | 11.9 (7.3 to 17.4)        | 17.2 (11.2 to 25.4)      | -18 (-37.9 to 10.2)     | -18.3 (-38.1 to 12.6)  | -21.1 (-41.3 to 6.5)   |
|                                          |             | Deaths  | 416.6 (262.3 to 601.6)    | 342.5 (199.1 to 492.5)    | 500.8 (321.2 to 723.7)    | 301.9 (197.4 to 425.5) | 248.8 (152.3 to 360.9)    | 357.1 (237 to 516.6)     | -27.5 (-46 to -2.3)     | -27.4 (-46 to 0.8)     | -28.7 (-47.5 to -2.5)  |
|                                          |             | Deaths  | 389.7 (238.1 to 569.3)    | 317 (181.1 to 461.9)      | 472.5 (295.8 to 693.3)    | 276.5 (179.4 to 397.4) | 224.3 (135.9 to 332.7)    | 330.7 (213.5 to 485.4)   | -29 (-47.9 to -1.6)     | -29.2 (-48.6 to 0.8)   | -30 (-49.1 to -2.3)    |
| Secondhand smoke                         | YLLs        | Deaths  | 26.9 (17.5 to 37.6)       | 25.5 (16.2 to 36.9)       | 28.3 (18.5 to 38.9)       | 25.4 (16.3 to 36.1)    | 24.4 (15 to 35.5)         | 26.4 (17.3 to 36.9)      | -5.7 (-15 to 2.9)       | -4.3 (-16.2 to 7.2)    | -6.9 (-17 to 4.8)      |
|                                          |             | Deaths  | 6.5 (1.4 to 14.4)         | 6.4 (1.5 to 14.2)         | 6.6 (1.2 to 14.4)         | 7.6 (1.7 to 16.8)      | 7.9 (1.8 to 17.3)         | 7.3 (1.4 to 16.2)        | 18.1 (-7.9 to 52)       | 23.6 (-9 to 64.3)      | 11.6 (-16.4 to 49.4)   |
|                                          |             | Deaths  | 96.6 (19.7 to 227.1)      | 96.7 (21.1 to 220.6)      | 96.4 (16.7 to 230.5)      | 117.4 (23.3 to 274.9)  | 123.8 (27.1 to 289.2)     | 110.6 (19.5 to 268)      | 21.4 (-4.2 to 54.6)     | 28 (-3.5 to 67.2)      | 14.7 (-14.3 to 52.3)   |
| Smoking                                  | YLLs        | Deaths  | 86.2 (17.4 to 202.3)      | 84.7 (18.7 to 198.2)      | 88 (15.7 to 208.6)        | 105.2 (20.7 to 243.7)  | 109.2 (23.5 to 254.6)     | 101 (17.9 to 243.3)      | 22.1 (-6.2 to 60.8)     | 28.9 (-5.5 to 74.3)    | 14.8 (-16 to 56.8)     |
|                                          |             | Deaths  | 10.4 (2 to 26.6)          | 12 (2.3 to 30.1)          | 8.4 (1.3 to 22.4)         | 12.2 (2.1 to 31.1)     | 14.6 (2.7 to 36.2)        | 9.6 (1.5 to 25.8)        | 16.3 (2.1 to 28.5)      | 22 (4.5 to 38.4)       | 14.2 (-2 to 33.2)      |
|                                          |             | Deaths  | 4.8 (-0.7 to 11.2)        | 4.8 (-0.7 to 11)          | 4.9 (-0.7 to 11.2)        | 3.3 (-0.3 to 6.8)      | 3.4 (-0.4 to 7.1)         | 3.2 (-0.3 to 6.8)        | -32 (-68.8 to 18.8)     | -29.8 (-67.6 to 23.7)  | -35 (-68.6 to 17.8)    |
| Smoking                                  | DALYs       | Deaths  | 95 (-13.8 to 219.4)       | 94.7 (-13.6 to 218.1)     | 95.9 (-14.2 to 217)       | 60.9 (-6.2 to 127.1)   | 62.3 (-6.4 to 130.1)      | 59.6 (-6.2 to 126)       | -35.9 (-71.3 to 14.8)   | -34.2 (-71.6 to 19)    | -37.9 (-70.9 to 12.3)  |
|                                          |             | Deaths  | 6.7 (4.2 to 9.6)          | 7.5 (4.5 to 10.8)         | 5.8 (3.7 to 8.4)          | 5.2 (3.4 to 7.3)       | 5.7 (3.8 to 8.2)          | 4.6 (3 to 6.8)           | -22.2 (-40.6 to 4.1)    | -22.9 (-42 to 6.6)     | -21 (-41.2 to 8.1)     |
|                                          |             | Deaths  | 160.9 (102.8 to 231.8)    | 190.6 (119.7 to 275.8)    | 131.8 (82.8 to 192.4)     | 123.9 (82.1 to 177.5)  | 144.1 (95.9 to 207.4)     | 103.4 (67.5 to 152)      | -23 (-43.2 to 6)        | -24.4 (-44.7 to 7.9)   | -21.6 (-43.3 to 9.1)   |
| Smoking                                  | YLLs        | Deaths  | 153.9 (96.8 to 224.1)     | 181.3 (111.8 to 264.9)    | 127.2 (78.8 to 187.3)     | 116.5 (77.4 to 169.7)  | 134.4 (88.3 to 196)       | 98.5 (63.4 to 144.9)     | -24.3 (-44.9 to 6)      | -25.9 (-46.9 to 8.2)   | -22.6 (-44.6 to 9.1)   |
|                                          |             | Deaths  | 7 (4.5 to 9.6)            | 9.3 (6 to 12.8)           | 4.6 (3 to 6.4)            | 7.3 (4.7 to 10.1)      | 9.7 (6.2 to 13.5)         | 4.9 (3.2 to 6.9)         | 5.1 (-2.7 to 13.4)      | 4.3 (-5.2 to 14.8)     | 6.9 (-5.7 to 21.2)     |
|                                          |             | Deaths  | 26 (18 to 35.4)           | 16.4 (10.2 to 24.8)       | 38.2 (26.4 to 51.4)       | 18.7 (13.7 to 24.9)    | 12 (8.4 to 16.7)          | 25.7 (18.6 to 34.8)      | -28.2 (-47.1 to -0.7)   | -26.9 (-51.2 to 13.5)  | -32.8 (-51.2 to -6.6)  |
| Smoking                                  | DALYs       | Deaths  | 717.1 (498 to 985.3)      | 465 (292.8 to 699.7)      | 993.7 (685.1 to 1358.3)   | 500.7 (373.3 to 659.1) | 338.8 (240.6 to 464.2)    | 666.3 (490.7 to 912.1)   | -30.2 (-49.1 to -1.4)   | -27.1 (-51.9 to 12.4)  | -32.9 (-51.1 to -5.8)  |
|                                          |             | Deaths  | 668.6 (455.7 to 931)      | 427.7 (261.2 to 661.3)    | 933.3 (630.7 to 1288.7)   | 454.5 (329.2 to 612.4) | 301.3 (207.9 to 426.1)    | 611.3 (438.1 to 853.4)   | -32 (-51.5 to -1.6)     | -29.6 (-54.5 to 10.7)  | -34.5 (-53.7 to -5.6)  |
|                                          |             | Deaths  | 48.5 (35 to 63.7)         | 37.3 (24.9 to 53)         | 60.4 (42.8 to 77.8)       | 46.2 (33 to 59.4)      | 37.6 (26 to 50.3)         | 55 (39.4 to 70.1)        | -4.7 (-17.6 to 11.9)    | 0.7 (-24.4 to 37.4)    | -9 (-18.8 to 2.9)      |
