# Supplementary material for: Burden of stroke in North Africa and Middle East, 1990 to 2019: a systematic analysis for the global burden of disease study 2019
Source: Springer Nature journal article supplement (doi:10.1186/s12883-022-02793-0), 2022-07-27
Supplement: MOESM5 [file 23310060]

| Location                     |                            | Sex    | New cases |        | Expected new cases in 2019 |                           | % 1990 - 2019 new cases change cause |                      |                       | % 1990 - 2019 new cases overall change |
|------------------------------|----------------------------|--------|-----------|--------|----------------------------|---------------------------|--------------------------------------|----------------------|-----------------------|----------------------------------------|
|                              |                            |        | 1990      | 2019   | Population growth          | Population growth + Aging | Population growth                    | Age structure change | Incidence rate change |                                        |
| North Africa and Middle East |                            | Female | 191319    | 430334 | 332540                     | 458953                    | 73.8%                                | 66.1%                | -15%                  | 124.9%                                 |
|                              |                            | Male   | 168353    | 399469 | 301199                     | 415476                    | 78.9%                                | 67.9%                | -9.5%                 | 137.3%                                 |
| Country                      | Afghanistan                | Female | 9347      | 20456  | 30193                      | 21722                     | 223%                                 | -90.6%               | -13.5%                | 118.9%                                 |
|                              |                            | Male   | 8024      | 16329  | 27897                      | 16330                     | 247.7%                               | -144.2%              | 0%                    | 103.5%                                 |
|                              | Algeria                    | Female | 15131     | 32148  | 24996                      | 38892                     | 65.2%                                | 91.8%                | -44.6%                | 112.5%                                 |
|                              |                            | Male   | 12856     | 28904  | 21320                      | 34699                     | 65.8%                                | 104.1%               | -45.1%                | 124.8%                                 |
|                              | Bahrain                    | Female | 178       | 519    | 455                        | 774                       | 155.2%                               | 178.9%               | -142.8%               | 191.3%                                 |
|                              |                            | Male   | 185       | 717    | 564                        | 1030                      | 204.8%                               | 251.9%               | -169.1%               | 287.7%                                 |
|                              | Egypt                      | Female | 34321     | 79014  | 60217                      | 67198                     | 75.5%                                | 20.3%                | 34.4%                 | 130.2%                                 |
|                              |                            | Male   | 29602     | 73688  | 53335                      | 67829                     | 80.2%                                | 49%                  | 19.8%                 | 148.9%                                 |
|                              | Iran (Islamic Republic of) | Female | 23725     | 52562  | 34389                      | 62938                     | 44.9%                                | 120.3%               | -43.7%                | 121.5%                                 |
|                              |                            | Male   | 24549     | 50216  | 35128                      | 62645                     | 43.1%                                | 112.1%               | -50.6%                | 104.6%                                 |
|                              | Iraq                       | Female | 12476     | 31249  | 29747                      | 36014                     | 138.4%                               | 50.2%                | -38.2%                | 150.5%                                 |
|                              |                            | Male   | 11344     | 29154  | 27255                      | 33296                     | 140.3%                               | 53.3%                | -36.5%                | 157%                                   |
|                              | Jordan                     | Female | 2404      | 7566   | 7249                       | 10814                     | 201.6%                               | 148.3%               | -135.1%               | 214.8%                                 |
|                              |                            | Male   | 2170      | 7891   | 6826                       | 10368                     | 214.6%                               | 163.2%               | -114.1%               | 263.7%                                 |
|                              | Kuwait                     | Female | 468       | 1630   | 1279                       | 1966                      | 173.6%                               | 146.9%               | -71.9%                | 248.6%                                 |
|                              |                            | Male   | 612       | 2375   | 1440                       | 2170                      | 135.2%                               | 119.4%               | 33.4%                 | 288%                                   |
|                              | Lebanon                    | Female | 2250      | 4840   | 3651                       | 5399                      | 62.2%                                | 77.7%                | -24.8%                | 115.1%                                 |
|                              |                            | Male   | 1428      | 2960   | 2199                       | 2946                      | 54%                                  | 52.3%                | 1%                    | 107.3%                                 |
|                              | Libya                      | Female | 1868      | 5562   | 3009                       | 5000                      | 61.1%                                | 106.6%               | 30.1%                 | 197.8%                                 |
|                              |                            | Male   | 1465      | 3796   | 2301                       | 3510                      | 57%                                  | 82.5%                | 19.5%                 | 159.1%                                 |
| Morocco                      | Female                     | 16749  | 35310     | 23591  | 35797                      | 40.9%                     | 72.9%                                | -2.9%                | 110.8%                |                                        |
|                              | Male                       | 14086  | 28382     | 20200  | 30457                      | 43.4%                     | 72.8%                                | -14.7%               | 101.5%                |                                        |
| Oman                         | Female                     | 727    | 1501      | 1463   | 1794                       | 101.3%                    | 45.5%                                | -40.3%               | 106.5%                |                                        |
|                              | Male                       | 915    | 2200      | 2385   | 2758                       | 160.6%                    | 40.8%                                | -61%                 | 140.4%                |                                        |
| Palestine                    | Female                     | 1132   | 2654      | 2679   | 2889                       | 136.7%                    | 18.5%                                | -20.7%               | 134.6%                |                                        |
|                              | Male                       | 820    | 2091      | 1986   | 2319                       | 142.1%                    | 40.6%                                | -27.8%               | 154.9%                |                                        |
| Qatar                        | Female                     | 113    | 511       | 558    | 714                        | 392.2%                    | 137.7%                               | -178.4%              | 351.4%                |                                        |
|                              | Male                       | 208    | 1377      | 1497   | 1840                       | 618.7%                    | 164.5%                               | -222%                | 561.3%                |                                        |

| Location             | Sex    | New cases |       | Expected new cases in 2019 |                           | % 1990 - 2019 new cases change cause |                      |                       | % 1990 - 2019 new cases overall change |
|----------------------|--------|-----------|-------|----------------------------|---------------------------|--------------------------------------|----------------------|-----------------------|----------------------------------------|
|                      |        | 1990      | 2019  | Population growth          | Population growth + Aging | Population growth                    | Age structure change | Incidence rate change |                                        |
| Saudi Arabia         | Female | 5205      | 17995 | 10944                      | 14939                     | 110.2%                               | 76.8%                | 58.7%                 | 245.7%                                 |
|                      | Male   | 6366      | 23065 | 14801                      | 19695                     | 132.5%                               | 76.9%                | 52.9%                 | 262.3%                                 |
| Sudan                | Female | 12723     | 25520 | 25611                      | 25967                     | 101.3%                               | 2.8%                 | -3.5%                 | 100.6%                                 |
|                      | Male   | 11456     | 23075 | 23230                      | 24232                     | 102.8%                               | 8.7%                 | -10.1%                | 101.4%                                 |
| Syrian Arab Republic | Female | 6673      | 11090 | 7874                       | 14064                     | 18%                                  | 92.8%                | -44.6%                | 66.2%                                  |
|                      | Male   | 7058      | 11075 | 7552                       | 13782                     | 7%                                   | 88.3%                | -38.4%                | 56.9%                                  |
| Tunisia              | Female | 4291      | 10707 | 5991                       | 10726                     | 39.6%                                | 110.3%               | -0.4%                 | 149.5%                                 |
|                      | Male   | 4032      | 8952  | 5430                       | 9001                      | 34.7%                                | 88.6%                | -1.2%                 | 122%                                   |
| Turkey               | Female | 33864     | 68061 | 46269                      | 76703                     | 36.6%                                | 89.9%                | -25.5%                | 101%                                   |
|                      | Male   | 23786     | 57284 | 32257                      | 53175                     | 35.6%                                | 87.9%                | 17.3%                 | 140.8%                                 |
| United Arab Emirates | Female | 618       | 3827  | 2368                       | 4082                      | 282.9%                               | 277.3%               | -41.2%                | 519%                                   |
|                      | Male   | 1169      | 10655 | 6474                       | 11410                     | 454.1%                               | 422.4%               | -64.7%                | 811.8%                                 |
| Yemen                | Female | 6926      | 17173 | 16016                      | 18462                     | 131.2%                               | 35.3%                | -18.6%                | 148%                                   |
|                      | Male   | 6108      | 14878 | 13910                      | 16686                     | 127.7%                               | 45.4%                | -29.6%                | 143.6%                                 |
